# Supplementary material
Source: PubMed Central journal article supplement (PMC3172680)
Supplement: NIHMS305078-supplement-2.pdf [file NIHMS305078-supplement-2.pdf]

**Supplementary Figure 1. LD plot of the five MHC SNPs that showed suggestive or significant evidence of association with generalized vitiligo age-of-onset. Pair-wise LD ( $r^2$ ) values are shown.**

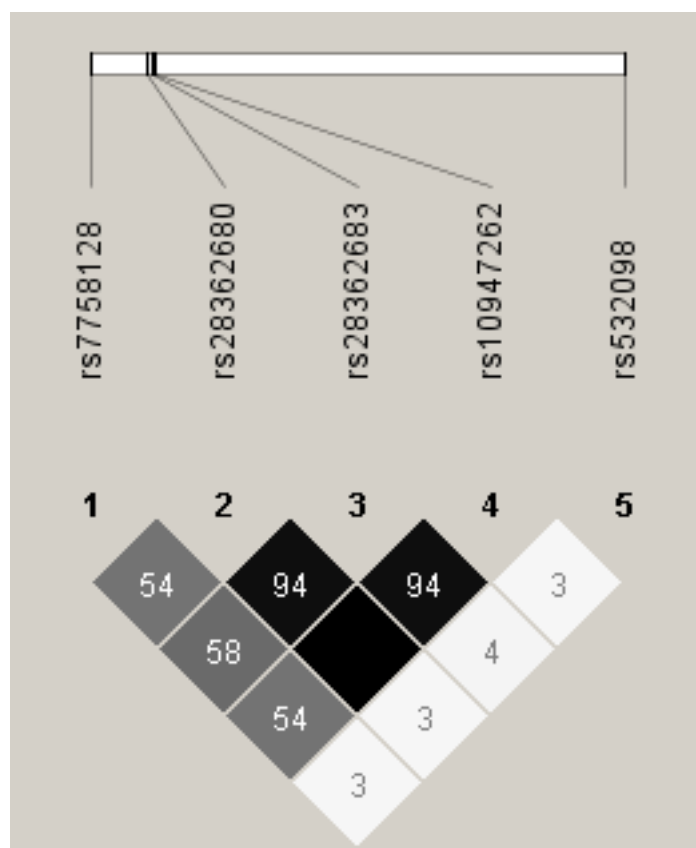

**Supplementary Table 1. SNPs with Strongest association with GV Age-of-Onset Genome-Wide**

| Chr.   | Locus Region <sup>a</sup> | SNP        | Location (nt) | Risk Allele | Risk Allele Frequency | Effect <sup>b</sup> (year) | p Value  | PC corrected p Value <sup>c</sup> |
|--------|---------------------------|------------|---------------|-------------|-----------------------|----------------------------|----------|-----------------------------------|
| 6p21.3 | <i>C6orf10/BTNL2</i>      | rs7758128  | 32345283      | A           | 0.06                  | -7.56                      | 5.98E-09 | 9.94E-09                          |
| 6p21.3 | <i>C6orf10/BTNL2</i>      | rs28362680 | 32370816      | T           | 0.11                  | -4.84                      | 1.48E-06 | 1.72E-06                          |
| 6p21.3 | <i>C6orf10/BTNL2</i>      | rs28362683 | 32372963      | T           | 0.11                  | -5.45                      | 1.09E-07 | 1.49E-07                          |
| 6p21.3 | <i>C6orf10/BTNL2</i>      | rs10947262 | 32373312      | T           | 0.11                  | -4.84                      | 1.48E-06 | 1.72E-06                          |
| 6p21.3 | <i>HLA-DRB1/-DQA1</i>     | rs532098   | 32578052      | T           | 0.60                  | -3.00                      | 2.03E-06 | 2.03E-06                          |

<sup>a</sup> Genes in close proximity to the designated SNP.

<sup>b</sup> Effect sizes are measured as additive effects, which correspond to the average change in phenotype with one wild-type allele is replaced with one risk allele.

<sup>c</sup> Statistics were adjusted for potential population stratification by including as continuous covariates in the linear regression analysis the three significant principal components (PC; Tracy-Widom  $p < 0.1$ ) in the GWA study samples detected by the EIGENSOFT package<sup>11</sup>. SNP nucleotide positions are from GRCh37.

Supplementary Table 2. Association Analysis of MHC Region SNPs with Generalized Vitiligo Age-of-Onset

| Chr. | SNP        | Location (nt) | Minor allele |           | Effect (year) | p        | PCA corrected p |
|------|------------|---------------|--------------|-----------|---------------|----------|-----------------|
|      |            |               | Minor allele | frequency |               |          |                 |
| 6    | rs6910741  | 25895575      | C            | 0.15      | -1.33         | 1.36E-01 | 1.48E-01        |
| 6    | rs7748167  | 25904652      | C            | 0.09      | 1.12          | 3.16E-01 | 3.49E-01        |
| 6    | rs1865760  | 25916979      | T            | 0.41      | -0.08         | 8.97E-01 | 9.92E-01        |
| 6    | rs7749342  | 25920265      | C            | 0.49      | 0.25          | 6.97E-01 | 6.30E-01        |
| 6    | rs2071297  | 25924513      | G            | 0.41      | -0.11         | 8.68E-01 | 9.79E-01        |
| 6    | rs7770139  | 25925823      | G            | 0.41      | -0.11         | 8.68E-01 | 9.79E-01        |
| 6    | rs3734523  | 25925987      | T            | 0.08      | 1.05          | 3.54E-01 | 3.92E-01        |
| 6    | rs10484431 | 25926674      | G            | 0.26      | -0.12         | 8.66E-01 | 7.99E-01        |
| 6    | rs9295676  | 25928376      | T            | 0.04      | -2.58         | 1.19E-01 | 1.18E-01        |
| 6    | rs199741   | 25931577      | A            | 0.22      | -0.55         | 4.62E-01 | 4.63E-01        |
| 6    | rs6940007  | 25931957      | C            | 0.08      | 1.05          | 3.54E-01 | 3.92E-01        |
| 6    | rs199736   | 25936787      | G            | 0.29      | -0.18         | 7.92E-01 | 7.54E-01        |
| 6    | rs1436307  | 25939723      | A            | 0.41      | -0.02         | 9.75E-01 | 9.15E-01        |
| 6    | rs7746105  | 25944278      | C            | 0.20      | -0.27         | 7.34E-01 | 6.93E-01        |
| 6    | rs2051541  | 25945211      | C            | 0.50      | 0.24          | 7.02E-01 | 6.38E-01        |
| 6    | rs6906576  | 25956501      | T            | 0.05      | -1.85         | 1.90E-01 | 2.12E-01        |
| 6    | rs169219   | 25957392      | G            | 0.38      | 0.28          | 6.70E-01 | 7.40E-01        |
| 6    | rs199738   | 25963456      | C            | 0.21      | -0.14         | 8.60E-01 | 8.19E-01        |
| 6    | rs2009610  | 25967068      | A            | 0.25      | 0.58          | 4.29E-01 | 3.50E-01        |
| 6    | rs2051538  | 25991620      | T            | 0.16      | 0.21          | 8.02E-01 | 8.59E-01        |
| 6    | rs2013063  | 25994098      | A            | 0.44      | -0.04         | 9.50E-01 | 9.32E-01        |
| 6    | rs12216125 | 25997458      | T            | 0.36      | 0.26          | 6.96E-01 | 5.90E-01        |
| 6    | rs10484432 | 26008876      | A            | 0.24      | 0.70          | 3.44E-01 | 2.66E-01        |
| 6    | rs199750   | 26016462      | C            | 0.29      | -0.65         | 3.54E-01 | 3.33E-01        |
| 6    | rs2237231  | 26017171      | A            | 0.07      | -1.61         | 1.82E-01 | 2.01E-01        |
| 6    | rs16891235 | 26017542      | C            | 0.09      | 1.70          | 1.21E-01 | 1.44E-01        |
| 6    | rs9379818  | 26023206      | T            | 0.43      | -0.56         | 3.93E-01 | 4.90E-01        |
| 6    | rs10484434 | 26031613      | A            | 0.15      | 0.14          | 8.77E-01 | 9.27E-01        |
| 6    | rs2213284  | 26031868      | C            | 0.31      | -0.55         | 4.24E-01 | 3.94E-01        |
| 6    | rs2230655  | 26033506      | C            | 0.30      | -0.55         | 4.24E-01 | 3.94E-01        |
| 6    | rs1540275  | 26036476      | A            | 0.31      | -0.55         | 4.24E-01 | 3.94E-01        |

|   |            |          |   |      |       |          |          |
|---|------------|----------|---|------|-------|----------|----------|
| 6 | rs2032447  | 26044369 | T | 0.32 | -0.36 | 5.97E-01 | 5.58E-01 |
| 6 | rs9689245  | 26050845 | T | 0.14 | 1.05  | 2.50E-01 | 2.65E-01 |
| 6 | rs9295684  | 26069669 | C | 0.42 | -0.58 | 3.78E-01 | 4.75E-01 |
| 6 | rs2794719  | 26088890 | C | 0.42 | -0.56 | 3.93E-01 | 4.89E-01 |
| 6 | rs9366637  | 26089098 | T | 0.06 | -1.83 | 1.68E-01 | 1.80E-01 |
| 6 | rs1800562  | 26093141 | A | 0.06 | 0.14  | 9.13E-01 | 9.12E-01 |
| 6 | rs1572982  | 26094367 | A | 0.46 | 0.11  | 8.54E-01 | 9.12E-01 |
| 6 | rs707889   | 26095931 | T | 0.23 | 0.30  | 6.82E-01 | 5.80E-01 |
| 6 | rs17596719 | 26097194 | A | 0.13 | 0.99  | 2.88E-01 | 2.88E-01 |
| 6 | rs6918586  | 26097384 | C | 0.40 | 0.41  | 5.10E-01 | 5.85E-01 |
| 6 | rs1543680  | 26103177 | A | 0.23 | 0.29  | 6.98E-01 | 5.96E-01 |
| 6 | rs198853   | 26104096 | C | 0.30 | -0.38 | 5.79E-01 | 5.49E-01 |
| 6 | rs198845   | 26107790 | T | 0.36 | -0.22 | 7.39E-01 | 7.03E-01 |
| 6 | rs2051542  | 26108168 | T | 0.06 | -1.93 | 1.35E-01 | 1.56E-01 |
| 6 | rs16891315 | 26111756 | C | 0.10 | 1.33  | 2.14E-01 | 2.58E-01 |
| 6 | rs933199   | 26112893 | G | 0.06 | -1.84 | 1.53E-01 | 1.71E-01 |
| 6 | rs198838   | 26113340 | A | 0.46 | 0.10  | 8.78E-01 | 9.37E-01 |
| 6 | rs198834   | 26114372 | A | 0.36 | -0.16 | 8.05E-01 | 7.70E-01 |
| 6 | rs707896   | 26116424 | A | 0.17 | 0.09  | 9.14E-01 | 7.89E-01 |
| 6 | rs198828   | 26119459 | G | 0.46 | 0.11  | 8.59E-01 | 9.14E-01 |
| 6 | rs16891334 | 26124303 | C | 0.09 | 1.33  | 2.14E-01 | 2.58E-01 |
| 6 | rs129128   | 26125342 | G | 0.14 | -1.03 | 2.52E-01 | 2.40E-01 |
| 6 | rs17531978 | 26129392 | C | 0.15 | 0.68  | 4.39E-01 | 4.57E-01 |
| 6 | rs707899   | 26129948 | T | 0.17 | 0.24  | 7.73E-01 | 6.56E-01 |
| 6 | rs198806   | 26133616 | A | 0.40 | 0.53  | 3.97E-01 | 4.59E-01 |
| 6 | rs2856646  | 26135498 | T | 0.29 | -0.19 | 7.81E-01 | 7.43E-01 |
| 6 | rs7760713  | 26137652 | G | 0.06 | -1.85 | 1.55E-01 | 1.81E-01 |
| 6 | rs806970   | 26141375 | T | 0.07 | 0.00  | 9.99E-01 | 9.17E-01 |
| 6 | rs806972   | 26148311 | G | 0.01 | -2.22 | 4.11E-01 | 3.60E-01 |
| 6 | rs806973   | 26148326 | G | 0.38 | -0.69 | 2.84E-01 | 3.01E-01 |
| 6 | rs16891359 | 26149000 | C | 0.04 | -1.25 | 4.17E-01 | 4.35E-01 |
| 6 | rs9379827  | 26153335 | A | 0.25 | -0.62 | 3.93E-01 | 4.74E-01 |
| 6 | rs3857546  | 26157762 | T | 0.11 | -0.18 | 8.53E-01 | 7.62E-01 |
| 6 | rs1009181  | 26158993 | G | 0.37 | -0.48 | 4.63E-01 | 4.90E-01 |

|   |            |          |   |      |       |          |          |
|---|------------|----------|---|------|-------|----------|----------|
| 6 | rs9379829  | 26172219 | T | 0.24 | -0.38 | 6.03E-01 | 6.91E-01 |
| 6 | rs9379831  | 26175852 | A | 0.34 | -0.59 | 3.82E-01 | 4.56E-01 |
| 6 | rs4496782  | 26184617 | C | 0.23 | -0.58 | 4.33E-01 | 4.40E-01 |
| 6 | rs11751812 | 26187334 | T | 0.09 | -1.08 | 3.17E-01 | 3.32E-01 |
| 6 | rs806977   | 26189615 | A | 0.48 | 0.86  | 1.77E-01 | 1.99E-01 |
| 6 | rs11753837 | 26190747 | A | 0.10 | -0.94 | 3.81E-01 | 3.99E-01 |
| 6 | rs1341758  | 26200518 | T | 0.05 | -0.09 | 9.48E-01 | 9.86E-01 |
| 6 | rs3757135  | 26200707 | A | 0.15 | -0.63 | 4.79E-01 | 5.26E-01 |
| 6 | rs2069018  | 26205718 | G | 0.15 | -0.66 | 4.54E-01 | 5.10E-01 |
| 6 | rs989710   | 26206074 | T | 0.06 | -0.07 | 9.61E-01 | 9.55E-01 |
| 6 | rs2022448  | 26207928 | A | 0.15 | -0.59 | 5.00E-01 | 5.58E-01 |
| 6 | rs11755943 | 26211368 | G | 0.15 | -0.33 | 7.12E-01 | 7.69E-01 |
| 6 | rs11753131 | 26219384 | A | 0.15 | -0.42 | 6.35E-01 | 6.92E-01 |
| 6 | rs11754368 | 26221173 | A | 0.09 | -0.54 | 6.23E-01 | 6.34E-01 |
| 6 | rs11757549 | 26231608 | A | 0.09 | -0.54 | 6.23E-01 | 6.34E-01 |
| 6 | rs10946808 | 26233387 | G | 0.30 | -0.35 | 6.03E-01 | 6.57E-01 |
| 6 | rs16891458 | 26234476 | C | 0.05 | -0.06 | 9.64E-01 | 9.47E-01 |
| 6 | rs9358913  | 26239404 | G | 0.28 | -0.05 | 9.43E-01 | 9.98E-01 |
| 6 | rs3734533  | 26240624 | G | 0.18 | -1.39 | 8.00E-02 | 8.69E-02 |
| 6 | rs1000308  | 26244580 | A | 0.05 | 0.24  | 8.70E-01 | 8.01E-01 |
| 6 | rs6913828  | 26246664 | T | 0.06 | 0.28  | 8.39E-01 | 7.75E-01 |
| 6 | rs11753610 | 26251601 | C | 0.13 | -1.82 | 4.36E-02 | 4.37E-02 |
| 6 | rs6935954  | 26255451 | A | 0.41 | 0.40  | 5.39E-01 | 5.68E-01 |
| 6 | rs7773163  | 26267800 | T | 0.16 | -1.53 | 7.44E-02 | 6.67E-02 |
| 6 | rs9393692  | 26276650 | A | 0.43 | 0.63  | 3.19E-01 | 3.40E-01 |
| 6 | rs6939589  | 26289203 | T | 0.44 | 0.41  | 5.11E-01 | 5.55E-01 |
| 6 | rs9379844  | 26291527 | A | 0.40 | 0.42  | 5.10E-01 | 4.44E-01 |
| 6 | rs1883214  | 26306684 | A | 0.18 | -1.03 | 2.03E-01 | 2.13E-01 |
| 6 | rs6923139  | 26313348 | T | 0.08 | 0.51  | 6.49E-01 | 7.10E-01 |
| 6 | rs6903015  | 26322526 | G | 0.08 | 0.51  | 6.49E-01 | 7.10E-01 |
| 6 | rs11754384 | 26322985 | G | 0.15 | -1.69 | 5.29E-02 | 4.81E-02 |
| 6 | rs3778279  | 26325463 | C | 0.44 | 0.32  | 6.11E-01 | 6.06E-01 |
| 6 | rs2179152  | 26325888 | T | 0.37 | 0.30  | 6.49E-01 | 6.71E-01 |
| 6 | rs6939048  | 26327953 | G | 0.37 | 0.30  | 6.49E-01 | 6.71E-01 |

|   |            |          |   |      |       |          |          |
|---|------------|----------|---|------|-------|----------|----------|
| 6 | rs9358927  | 26330492 | G | 0.40 | 0.48  | 4.45E-01 | 3.84E-01 |
| 6 | rs2893842  | 26338434 | G | 0.32 | 0.22  | 7.47E-01 | 7.23E-01 |
| 6 | rs9358929  | 26341062 | A | 0.19 | -2.33 | 3.41E-03 | 2.73E-03 |
| 6 | rs9467715  | 26341301 | C | 0.28 | 0.86  | 2.24E-01 | 2.16E-01 |
| 6 | rs9461245  | 26354572 | A | 0.11 | -1.10 | 2.61E-01 | 2.77E-01 |
| 6 | rs6933583  | 26355283 | C | 0.26 | -1.21 | 9.10E-02 | 9.98E-02 |
| 6 | rs4712981  | 26361430 | T | 0.26 | -1.27 | 7.67E-02 | 8.45E-02 |
| 6 | rs12199613 | 26367218 | T | 0.36 | -0.81 | 2.21E-01 | 2.73E-01 |
| 6 | rs9379859  | 26369549 | T | 0.09 | -0.05 | 9.65E-01 | 9.80E-01 |
| 6 | rs10946818 | 26371006 | A | 0.16 | -1.77 | 4.01E-02 | 3.15E-02 |
| 6 | rs12176317 | 26372786 | G | 0.09 | 0.03  | 9.77E-01 | 9.61E-01 |
| 6 | rs9379870  | 26374410 | G | 0.26 | -1.22 | 8.89E-02 | 9.83E-02 |
| 6 | rs13218591 | 26376832 | C | 0.27 | -1.03 | 1.45E-01 | 1.64E-01 |
| 6 | rs9461249  | 26383386 | C | 0.10 | -0.61 | 5.57E-01 | 6.20E-01 |
| 6 | rs1796518  | 26388672 | T | 0.35 | -1.48 | 2.30E-02 | 2.26E-02 |
| 6 | rs7756881  | 26389926 | T | 0.19 | -0.87 | 2.85E-01 | 3.33E-01 |
| 6 | rs7356849  | 26396739 | C | 0.14 | -1.71 | 5.93E-02 | 6.24E-02 |
| 6 | rs4712988  | 26399796 | G | 0.12 | -1.59 | 9.97E-02 | 1.10E-01 |
| 6 | rs1741738  | 26401252 | G | 0.15 | -2.48 | 5.38E-03 | 4.55E-03 |
| 6 | rs1796520  | 26410800 | C | 0.49 | 1.70  | 7.17E-03 | 9.40E-03 |
| 6 | rs6900725  | 26413088 | C | 0.16 | -1.23 | 1.48E-01 | 1.67E-01 |
| 6 | rs4712990  | 26413744 | A | 0.11 | -0.40 | 6.85E-01 | 7.12E-01 |
| 6 | rs4320356  | 26423560 | T | 0.41 | -0.58 | 3.62E-01 | 4.17E-01 |
| 6 | rs10946829 | 26426487 | A | 0.16 | -1.22 | 1.51E-01 | 1.71E-01 |
| 6 | rs1741740  | 26428842 | A | 0.16 | 1.36  | 1.14E-01 | 1.39E-01 |
| 6 | rs2893848  | 26430981 | G | 0.16 | -1.23 | 1.47E-01 | 1.67E-01 |
| 6 | rs1624440  | 26433329 | G | 0.49 | 1.72  | 6.44E-03 | 8.49E-03 |
| 6 | rs12208390 | 26437106 | T | 0.10 | 0.19  | 8.56E-01 | 7.47E-01 |
| 6 | rs2281027  | 26446705 | C | 0.02 | -2.33 | 3.03E-01 | 2.85E-01 |
| 6 | rs2237236  | 26451553 | G | 0.41 | -0.66 | 3.03E-01 | 3.56E-01 |
| 6 | rs9295690  | 26456069 | C | 0.21 | -1.13 | 1.54E-01 | 1.62E-01 |
| 6 | rs13195509 | 26463660 | A | 0.07 | 1.04  | 3.84E-01 | 3.97E-01 |
| 6 | rs3799380  | 26467182 | C | 0.18 | 0.17  | 8.33E-01 | 8.19E-01 |
| 6 | rs6927012  | 26471992 | A | 0.10 | -2.84 | 7.09E-03 | 7.07E-03 |

|   |            |          |   |      |       |          |          |
|---|------------|----------|---|------|-------|----------|----------|
| 6 | rs7763910  | 26472655 | A | 0.40 | -1.11 | 8.78E-02 | 1.00E-01 |
| 6 | rs1407045  | 26476155 | G | 0.50 | 1.18  | 6.19E-02 | 7.34E-02 |
| 6 | rs12208272 | 26477640 | A | 0.10 | -0.34 | 7.40E-01 | 7.63E-01 |
| 6 | rs9358946  | 26478927 | A | 0.17 | 0.01  | 9.88E-01 | 9.69E-01 |
| 6 | rs16891725 | 26479150 | T | 0.10 | 0.98  | 3.53E-01 | 3.44E-01 |
| 6 | rs9357008  | 26479891 | G | 0.22 | -1.64 | 3.14E-02 | 3.66E-02 |
| 6 | rs7756567  | 26481642 | G | 0.17 | 0.01  | 9.88E-01 | 9.69E-01 |
| 6 | rs6456730  | 26484376 | C | 0.01 | 1.68  | 5.67E-01 | 6.08E-01 |
| 6 | rs2093169  | 26495099 | T | 0.17 | 0.01  | 9.88E-01 | 9.69E-01 |
| 6 | rs13194984 | 26500563 | T | 0.13 | 1.25  | 1.81E-01 | 2.11E-01 |
| 6 | rs3736780  | 26505135 | C | 0.11 | -2.62 | 1.20E-02 | 1.21E-02 |
| 6 | rs3736781  | 26505362 | A | 0.47 | 1.05  | 9.90E-02 | 1.28E-01 |
| 6 | rs6911330  | 26524313 | G | 0.11 | -2.62 | 1.22E-02 | 1.24E-02 |
| 6 | rs15580    | 26546048 | C | 0.10 | -2.63 | 1.19E-02 | 1.21E-02 |
| 6 | rs9379892  | 26582414 | G | 0.21 | -1.26 | 1.03E-01 | 1.25E-01 |
| 6 | rs9379895  | 26592707 | G | 0.20 | 0.32  | 6.89E-01 | 6.24E-01 |
| 6 | rs12204145 | 26600156 | A | 0.10 | -0.33 | 7.46E-01 | 8.34E-01 |
| 6 | rs9379897  | 26601526 | C | 0.10 | 1.26  | 2.40E-01 | 2.26E-01 |
| 6 | rs12205310 | 26605864 | T | 0.14 | -0.41 | 6.48E-01 | 6.52E-01 |
| 6 | rs6919391  | 26608325 | G | 0.38 | -1.43 | 2.36E-02 | 2.92E-02 |
| 6 | rs6911476  | 26612363 | T | 0.01 | 0.68  | 8.38E-01 | 9.28E-01 |
| 6 | rs2451731  | 26624822 | G | 0.43 | 1.15  | 6.47E-02 | 9.02E-02 |
| 6 | rs2451741  | 26629404 | G | 0.43 | 1.19  | 5.61E-02 | 7.85E-02 |
| 6 | rs2451753  | 26649018 | C | 0.38 | -1.39 | 2.77E-02 | 3.43E-02 |
| 6 | rs2494711  | 26649421 | T | 0.38 | -1.39 | 2.77E-02 | 3.43E-02 |
| 6 | rs12201890 | 26662626 | C | 0.10 | -0.44 | 6.65E-01 | 7.47E-01 |
| 6 | rs7740197  | 26663478 | G | 0.20 | 0.43  | 5.85E-01 | 5.23E-01 |
| 6 | rs6901497  | 26700509 | A | 0.06 | -1.92 | 1.42E-01 | 1.62E-01 |
| 6 | rs2498399  | 26706544 | C | 0.40 | 1.23  | 5.49E-02 | 7.65E-02 |
| 6 | rs9467847  | 26709591 | C | 0.27 | -0.68 | 3.30E-01 | 3.66E-01 |
| 6 | rs3004047  | 26710391 | A | 0.14 | -1.66 | 6.98E-02 | 7.73E-02 |
| 6 | rs4711122  | 26758479 | T | 0.26 | -0.80 | 2.59E-01 | 2.94E-01 |
| 6 | rs9348738  | 26922906 | C | 0.12 | -2.74 | 6.62E-03 | 8.60E-03 |
| 6 | rs9393777  | 26942027 | C | 0.12 | 1.61  | 8.87E-02 | 8.00E-02 |



|   |            |          |   |      |       |          |          |
|---|------------|----------|---|------|-------|----------|----------|
| 6 | rs10946888 | 26951678 | T | 0.42 | -0.72 | 2.63E-01 | 3.22E-01 |
| 6 | rs7741445  | 26988992 | T | 0.10 | -2.00 | 5.90E-02 | 6.41E-02 |
| 6 | rs4358615  | 26998567 | A | 0.32 | -0.65 | 3.45E-01 | 3.89E-01 |
| 6 | rs4541737  | 27002821 | T | 0.09 | -0.49 | 6.46E-01 | 7.06E-01 |
| 6 | rs12527111 | 27006475 | C | 0.42 | -0.70 | 2.78E-01 | 3.43E-01 |
| 6 | rs12190473 | 27024687 | T | 0.19 | -0.19 | 8.19E-01 | 8.61E-01 |
| 6 | rs6916301  | 27042258 | T | 0.13 | 0.28  | 7.66E-01 | 7.19E-01 |
| 6 | rs6904071  | 27047256 | A | 0.16 | -0.72 | 4.07E-01 | 4.45E-01 |
| 6 | rs994690   | 27047916 | G | 0.02 | 2.50  | 2.60E-01 | 2.65E-01 |
| 6 | rs9368488  | 27052536 | G | 0.02 | 2.10  | 3.94E-01 | 3.72E-01 |
| 6 | rs6921388  | 27080205 | G | 0.31 | 0.04  | 9.58E-01 | 8.77E-01 |
| 6 | rs2393915  | 27080460 | C | 0.49 | -0.94 | 1.40E-01 | 1.78E-01 |
| 6 | rs7745603  | 27090404 | T | 0.21 | 0.36  | 6.37E-01 | 5.97E-01 |
| 6 | rs6913660  | 27091425 | A | 0.16 | -0.72 | 4.07E-01 | 4.45E-01 |
| 6 | rs1321578  | 27104783 | C | 0.04 | 3.96  | 1.45E-02 | 1.62E-02 |
| 6 | rs12193820 | 27113811 | G | 0.09 | -0.51 | 6.40E-01 | 7.06E-01 |
| 6 | rs9295730  | 27128806 | C | 0.31 | 0.01  | 9.85E-01 | 9.10E-01 |
| 6 | rs1028308  | 27129757 | T | 0.31 | 0.06  | 9.34E-01 | 8.59E-01 |
| 6 | rs858972   | 27154361 | A | 0.19 | -0.27 | 7.43E-01 | 7.92E-01 |
| 6 | rs1102563  | 27160095 | A | 0.25 | 0.66  | 3.67E-01 | 3.49E-01 |
| 6 | rs7755577  | 27171437 | C | 0.12 | 0.23  | 8.16E-01 | 8.30E-01 |
| 6 | rs12210982 | 27174235 | T | 0.06 | -0.97 | 4.75E-01 | 5.17E-01 |
| 6 | rs858985   | 27178028 | A | 0.10 | -0.33 | 7.50E-01 | 8.15E-01 |
| 6 | rs12153912 | 27179829 | A | 0.09 | -0.54 | 6.21E-01 | 6.85E-01 |
| 6 | rs13219354 | 27185664 | C | 0.09 | 0.40  | 7.15E-01 | 7.22E-01 |
| 6 | rs1156086  | 27187355 | G | 0.27 | 0.67  | 3.53E-01 | 3.41E-01 |
| 6 | rs996247   | 27193095 | A | 0.27 | 0.70  | 3.25E-01 | 3.08E-01 |
| 6 | rs6918423  | 27194072 | G | 0.17 | 1.11  | 1.92E-01 | 2.02E-01 |
| 6 | rs3800312  | 27210614 | A | 0.17 | 1.16  | 1.69E-01 | 1.78E-01 |
| 6 | rs9393796  | 27226965 | G | 0.10 | 0.07  | 9.49E-01 | 8.98E-01 |
| 6 | rs11758636 | 27229561 | A | 0.05 | 2.77  | 4.42E-02 | 4.61E-02 |
| 6 | rs9295732  | 27230815 | C | 0.02 | 1.00  | 6.44E-01 | 6.80E-01 |
| 6 | rs6915678  | 27235866 | G | 0.34 | 0.47  | 4.79E-01 | 4.29E-01 |
| 6 | rs17687319 | 27238000 | C | 0.08 | -0.01 | 9.94E-01 | 1.00E+00 |

|   |            |          |   |      |       |          |          |
|---|------------|----------|---|------|-------|----------|----------|
| 6 | rs6917419  | 27243480 | T | 0.11 | -0.01 | 9.91E-01 | 9.61E-01 |
| 6 | rs9379968  | 27244590 | A | 0.46 | 0.28  | 6.64E-01 | 6.23E-01 |
| 6 | rs6932590  | 27248931 | C | 0.23 | -0.35 | 6.47E-01 | 6.51E-01 |
| 6 | rs7746199  | 27261324 | T | 0.15 | 0.13  | 8.80E-01 | 9.43E-01 |
| 6 | rs7771953  | 27271343 | A | 0.41 | 0.37  | 5.63E-01 | 5.55E-01 |
| 6 | rs9379976  | 27298200 | C | 0.24 | 0.44  | 5.53E-01 | 4.69E-01 |
| 6 | rs9379977  | 27298279 | C | 0.24 | 0.43  | 5.59E-01 | 4.77E-01 |
| 6 | rs721600   | 27298905 | A | 0.25 | 0.41  | 5.78E-01 | 4.92E-01 |
| 6 | rs1156457  | 27300580 | C | 0.13 | 0.30  | 7.54E-01 | 7.40E-01 |
| 6 | rs9461362  | 27303927 | T | 0.16 | 0.34  | 6.93E-01 | 6.46E-01 |
| 6 | rs9461366  | 27310533 | A | 0.40 | 0.48  | 4.49E-01 | 3.77E-01 |
| 6 | rs1011665  | 27332298 | G | 0.45 | -0.01 | 9.88E-01 | 8.91E-01 |
| 6 | rs6914864  | 27336489 | T | 0.36 | -0.46 | 4.84E-01 | 4.49E-01 |
| 6 | rs9468076  | 27338890 | T | 0.20 | 0.49  | 5.38E-01 | 4.44E-01 |
| 6 | rs1883403  | 27350329 | G | 0.46 | -0.04 | 9.53E-01 | 9.16E-01 |
| 6 | rs2143062  | 27353852 | A | 0.23 | -0.27 | 7.18E-01 | 7.79E-01 |
| 6 | rs13220817 | 27356527 | T | 0.46 | -0.11 | 8.59E-01 | 9.88E-01 |
| 6 | rs10807020 | 27356902 | A | 0.25 | -0.43 | 5.62E-01 | 6.01E-01 |
| 6 | rs10807021 | 27356925 | T | 0.25 | -0.50 | 5.03E-01 | 5.38E-01 |
| 6 | rs2206251  | 27358392 | C | 0.25 | -0.43 | 5.62E-01 | 6.01E-01 |
| 6 | rs2076305  | 27375611 | T | 0.32 | 0.04  | 9.59E-01 | 9.40E-01 |
| 6 | rs6938943  | 27376910 | G | 0.36 | -0.17 | 7.99E-01 | 8.04E-01 |
| 6 | rs7744655  | 27384069 | A | 0.01 | 2.47  | 4.57E-01 | 5.35E-01 |
| 6 | rs6456785  | 27390399 | T | 0.43 | 0.04  | 9.56E-01 | 8.75E-01 |
| 6 | rs6926142  | 27395764 | T | 0.44 | 0.17  | 7.90E-01 | 7.37E-01 |
| 6 | rs1569566  | 27400031 | G | 0.35 | -0.23 | 7.32E-01 | 7.58E-01 |
| 6 | rs760880   | 27408181 | C | 0.34 | 0.06  | 9.29E-01 | 8.82E-01 |
| 6 | rs7772160  | 27412386 | C | 0.44 | 0.05  | 9.36E-01 | 8.88E-01 |
| 6 | rs1883216  | 27425185 | C | 0.36 | -0.12 | 8.54E-01 | 8.84E-01 |
| 6 | rs10946921 | 27431855 | A | 0.29 | -0.65 | 3.61E-01 | 3.93E-01 |
| 6 | rs7761966  | 27445703 | T | 0.47 | -0.40 | 5.25E-01 | 4.51E-01 |
| 6 | rs4713108  | 27458013 | A | 0.37 | -0.09 | 8.85E-01 | 9.73E-01 |
| 6 | rs10456051 | 27463436 | C | 0.08 | 1.34  | 2.49E-01 | 2.09E-01 |
| 6 | rs16867808 | 27463684 | C | 0.08 | -0.24 | 8.36E-01 | 9.00E-01 |

|   |            |          |   |      |       |          |          |
|---|------------|----------|---|------|-------|----------|----------|
| 6 | rs6903282  | 27466712 | A | 0.37 | -0.14 | 8.30E-01 | 9.16E-01 |
| 6 | rs12189640 | 27474657 | C | 0.08 | 1.34  | 2.49E-01 | 2.09E-01 |
| 6 | rs2205829  | 27480227 | G | 0.48 | -0.21 | 7.39E-01 | 8.39E-01 |
| 6 | rs2205831  | 27480308 | C | 0.38 | -0.34 | 6.06E-01 | 6.86E-01 |
| 6 | rs6918131  | 27480917 | G | 0.30 | -0.94 | 1.84E-01 | 2.06E-01 |
| 6 | rs970668   | 27488602 | T | 0.11 | -0.13 | 8.98E-01 | 8.88E-01 |
| 6 | rs6904596  | 27491299 | A | 0.07 | 1.62  | 1.76E-01 | 1.93E-01 |
| 6 | rs2064092  | 27511371 | A | 0.07 | -1.15 | 3.31E-01 | 3.32E-01 |
| 6 | rs6934794  | 27519345 | A | 0.19 | -0.55 | 4.88E-01 | 4.88E-01 |
| 6 | rs6908024  | 27526897 | G | 0.11 | -0.35 | 7.39E-01 | 7.24E-01 |
| 6 | rs10484399 | 27534528 | G | 0.07 | 1.48  | 2.32E-01 | 2.41E-01 |
| 6 | rs6903982  | 27545744 | C | 0.07 | -1.20 | 3.23E-01 | 3.04E-01 |
| 6 | rs7774939  | 27547792 | A | 0.20 | -0.40 | 6.13E-01 | 5.91E-01 |
| 6 | rs4713113  | 27555126 | A | 0.20 | -0.46 | 5.52E-01 | 5.38E-01 |
| 6 | rs10946940 | 27560587 | A | 0.35 | 0.34  | 6.07E-01 | 5.84E-01 |
| 6 | rs9461392  | 27566169 | T | 0.11 | -0.41 | 6.93E-01 | 6.80E-01 |
| 6 | rs2143082  | 27601587 | G | 0.13 | 0.16  | 8.70E-01 | 9.01E-01 |
| 6 | rs6917366  | 27634640 | T | 0.19 | 0.47  | 5.69E-01 | 5.38E-01 |
| 6 | rs9368521  | 27645278 | C | 0.09 | -0.49 | 6.64E-01 | 6.44E-01 |
| 6 | rs1010261  | 27655564 | A | 0.02 | 3.04  | 2.17E-01 | 2.38E-01 |
| 6 | rs9348772  | 27656090 | T | 0.31 | 0.27  | 6.91E-01 | 6.84E-01 |
| 6 | rs10946943 | 27656255 | A | 0.09 | -0.49 | 6.64E-01 | 6.44E-01 |
| 6 | rs9380006  | 27656499 | C | 0.18 | 0.51  | 5.42E-01 | 5.25E-01 |
| 6 | rs6920044  | 27657647 | A | 0.09 | -0.33 | 7.67E-01 | 7.47E-01 |
| 6 | rs9380007  | 27660508 | C | 0.36 | 0.61  | 3.49E-01 | 3.54E-01 |
| 6 | rs12663707 | 27668013 | A | 0.09 | -0.33 | 7.67E-01 | 7.47E-01 |
| 6 | rs17749927 | 27669976 | G | 0.07 | 1.48  | 2.32E-01 | 2.41E-01 |
| 6 | rs2393997  | 27670697 | T | 0.13 | -1.15 | 2.15E-01 | 2.37E-01 |
| 6 | rs10484400 | 27670917 | C | 0.09 | -0.33 | 7.67E-01 | 7.47E-01 |
| 6 | rs4713118  | 27676794 | G | 0.24 | 0.80  | 2.62E-01 | 2.43E-01 |
| 6 | rs9380010  | 27683572 | G | 0.22 | 0.36  | 6.30E-01 | 5.98E-01 |
| 6 | rs9295740  | 27689502 | A | 0.16 | 0.03  | 9.73E-01 | 9.99E-01 |
| 6 | rs9468209  | 27694421 | T | 0.36 | 0.47  | 4.68E-01 | 4.72E-01 |
| 6 | rs9468213  | 27706180 | A | 0.32 | 0.14  | 8.38E-01 | 8.23E-01 |

|   |            |          |   |      |       |          |          |
|---|------------|----------|---|------|-------|----------|----------|
| 6 | rs4713119  | 27712825 | G | 0.14 | -1.32 | 1.50E-01 | 1.66E-01 |
| 6 | rs9283880  | 27715243 | C | 0.23 | 0.40  | 5.87E-01 | 5.61E-01 |
| 6 | rs4713120  | 27721835 | A | 0.35 | 0.55  | 3.93E-01 | 3.98E-01 |
| 6 | rs7776351  | 27726731 | T | 0.23 | 0.47  | 5.18E-01 | 4.98E-01 |
| 6 | rs9295746  | 27730064 | C | 0.22 | 0.33  | 6.61E-01 | 6.17E-01 |
| 6 | rs742047   | 27739380 | G | 0.21 | 0.70  | 3.61E-01 | 3.15E-01 |
| 6 | rs6915101  | 27741682 | T | 0.01 | 1.46  | 5.84E-01 | 6.46E-01 |
| 6 | rs9468226  | 27746178 | G | 0.04 | -1.14 | 4.75E-01 | 5.08E-01 |
| 6 | rs9295749  | 27767395 | T | 0.06 | -1.05 | 4.30E-01 | 4.70E-01 |
| 6 | rs9461412  | 27771654 | C | 0.04 | -1.14 | 4.75E-01 | 5.08E-01 |
| 6 | rs200479   | 27771684 | C | 0.02 | 1.67  | 4.19E-01 | 4.62E-01 |
| 6 | rs200480   | 27773664 | C | 0.32 | 0.83  | 2.12E-01 | 2.13E-01 |
| 6 | rs9295750  | 27784428 | G | 0.07 | -0.98 | 4.20E-01 | 4.62E-01 |
| 6 | rs12196939 | 27787990 | A | 0.17 | -0.01 | 9.92E-01 | 9.30E-01 |
| 6 | rs175597   | 27810626 | G | 0.08 | 1.81  | 1.12E-01 | 1.25E-01 |
| 6 | rs200997   | 27811815 | T | 0.28 | 0.58  | 4.01E-01 | 3.89E-01 |
| 6 | rs200991   | 27815494 | T | 0.13 | 1.04  | 2.75E-01 | 2.77E-01 |
| 6 | rs13194781 | 27815639 | G | 0.07 | 1.68  | 1.74E-01 | 1.83E-01 |
| 6 | rs9461416  | 27825860 | A | 0.04 | -0.77 | 6.29E-01 | 6.84E-01 |
| 6 | rs200951   | 27835930 | G | 0.25 | 0.82  | 2.57E-01 | 2.52E-01 |
| 6 | rs200953   | 27837267 | C | 0.08 | 1.81  | 1.12E-01 | 1.25E-01 |
| 6 | rs510987   | 27847517 | A | 0.25 | 0.87  | 2.34E-01 | 2.28E-01 |
| 6 | rs200969   | 27859453 | G | 0.20 | 0.66  | 3.96E-01 | 3.79E-01 |
| 6 | rs200968   | 27859568 | G | 0.15 | 1.45  | 9.59E-02 | 8.92E-02 |
| 6 | rs1873213  | 27869321 | C | 0.03 | -0.73 | 6.78E-01 | 7.17E-01 |
| 6 | rs9468254  | 27884916 | A | 0.04 | -0.37 | 8.26E-01 | 8.64E-01 |
| 6 | rs731132   | 27885356 | G | 0.37 | -0.03 | 9.60E-01 | 9.96E-01 |
| 6 | rs2130357  | 27886830 | T | 0.26 | 0.06  | 9.34E-01 | 9.90E-01 |
| 6 | rs6933825  | 27890631 | G | 0.13 | 0.13  | 8.87E-01 | 9.99E-01 |
| 6 | rs156737   | 27895213 | C | 0.36 | 0.31  | 6.30E-01 | 6.94E-01 |
| 6 | rs9468256  | 27895504 | A | 0.13 | 0.13  | 8.87E-01 | 9.99E-01 |
| 6 | rs6910968  | 27904181 | T | 0.09 | -0.05 | 9.61E-01 | 8.40E-01 |
| 6 | rs7767176  | 27925367 | A | 0.07 | -1.09 | 3.64E-01 | 2.85E-01 |
| 6 | rs9380030  | 27925827 | G | 0.03 | -1.78 | 3.50E-01 | 3.50E-01 |

|   |            |          |   |      |       |          |          |
|---|------------|----------|---|------|-------|----------|----------|
| 6 | rs2116984  | 27932762 | A | 0.13 | 0.21  | 8.15E-01 | 9.23E-01 |
| 6 | rs13214703 | 27941387 | C | 0.08 | 0.49  | 6.72E-01 | 7.31E-01 |
| 6 | rs12332927 | 27955115 | C | 0.12 | -0.10 | 9.20E-01 | 9.57E-01 |
| 6 | rs9357054  | 27957079 | C | 0.04 | 0.03  | 9.85E-01 | 9.98E-01 |
| 6 | rs16893540 | 27958111 | A | 0.04 | -0.45 | 7.83E-01 | 8.05E-01 |
| 6 | rs149971   | 27982152 | A | 0.37 | 0.47  | 4.67E-01 | 5.24E-01 |
| 6 | rs149990   | 27998258 | A | 0.10 | 0.83  | 4.30E-01 | 4.52E-01 |
| 6 | rs17709145 | 28004556 | G | 0.06 | 0.60  | 6.49E-01 | 6.80E-01 |
| 6 | rs2394044  | 28008331 | C | 0.05 | -0.12 | 9.36E-01 | 9.57E-01 |
| 6 | rs149900   | 28014597 | T | 0.21 | 0.46  | 5.47E-01 | 5.53E-01 |
| 6 | rs9393879  | 28018944 | A | 0.05 | 0.45  | 7.55E-01 | 7.16E-01 |
| 6 | rs203888   | 28021589 | A | 0.21 | 0.26  | 7.27E-01 | 7.51E-01 |
| 6 | rs203890   | 28022248 | C | 0.21 | 0.26  | 7.27E-01 | 7.58E-01 |
| 6 | rs9468276  | 28027688 | C | 0.22 | 0.34  | 6.52E-01 | 6.66E-01 |
| 6 | rs149951   | 28033087 | C | 0.27 | 0.37  | 5.99E-01 | 5.94E-01 |
| 6 | rs149957   | 28037020 | T | 0.08 | -0.30 | 7.95E-01 | 8.14E-01 |
| 6 | rs203877   | 28048624 | C | 0.27 | 0.50  | 4.80E-01 | 4.73E-01 |
| 6 | rs17767294 | 28054198 | G | 0.09 | 0.62  | 5.67E-01 | 5.18E-01 |
| 6 | rs10484404 | 28055495 | T | 0.10 | -0.06 | 9.54E-01 | 8.22E-01 |
| 6 | rs3734572  | 28059458 | G | 0.04 | 1.43  | 3.98E-01 | 4.36E-01 |
| 6 | rs13197574 | 28060239 | C | 0.07 | 2.02  | 1.00E-01 | 1.05E-01 |
| 6 | rs203885   | 28076886 | A | 0.05 | 0.78  | 5.82E-01 | 5.75E-01 |
| 6 | rs1654774  | 28096280 | C | 0.42 | 0.34  | 5.87E-01 | 6.37E-01 |
| 6 | rs6929559  | 28134106 | C | 0.09 | 0.16  | 8.83E-01 | 9.86E-01 |
| 6 | rs9393902  | 28137730 | G | 0.04 | -1.52 | 3.16E-01 | 3.13E-01 |
| 6 | rs9380064  | 28143118 | G | 0.11 | 0.63  | 5.24E-01 | 5.44E-01 |
| 6 | rs1150683  | 28155314 | T | 0.05 | 0.74  | 5.99E-01 | 6.07E-01 |
| 6 | rs1233708  | 28173219 | A | 0.28 | 0.62  | 3.76E-01 | 3.80E-01 |
| 6 | rs1233665  | 28178512 | G | 0.13 | 0.57  | 5.51E-01 | 6.54E-01 |
| 6 | rs1150699  | 28181675 | T | 0.13 | 0.56  | 5.53E-01 | 6.63E-01 |
| 6 | rs1150704  | 28184371 | C | 0.13 | 0.56  | 5.53E-01 | 6.63E-01 |
| 6 | rs1233664  | 28185726 | A | 0.13 | 0.56  | 5.53E-01 | 6.63E-01 |
| 6 | rs1736894  | 28186554 | T | 0.13 | 0.56  | 5.51E-01 | 6.61E-01 |
| 6 | rs1736890  | 28189389 | C | 0.13 | 0.56  | 5.53E-01 | 6.63E-01 |

|   |            |          |   |      |       |          |          |
|---|------------|----------|---|------|-------|----------|----------|
| 6 | rs9380069  | 28203300 | G | 0.11 | 1.20  | 2.25E-01 | 2.30E-01 |
| 6 | rs11752073 | 28204793 | T | 0.10 | -0.20 | 8.51E-01 | 7.35E-01 |
| 6 | rs9295768  | 28209102 | A | 0.17 | 0.79  | 3.53E-01 | 3.51E-01 |
| 6 | rs967005   | 28210688 | A | 0.17 | 0.78  | 3.54E-01 | 3.51E-01 |
| 6 | rs7757215  | 28212489 | A | 0.05 | 0.08  | 9.53E-01 | 9.31E-01 |
| 6 | rs1233710  | 28215446 | T | 0.05 | 0.37  | 7.96E-01 | 7.25E-01 |
| 6 | rs2235359  | 28215641 | C | 0.14 | -0.25 | 7.88E-01 | 6.62E-01 |
| 6 | rs12214383 | 28223731 | T | 0.40 | 0.48  | 4.60E-01 | 5.25E-01 |
| 6 | rs12000    | 28227436 | G | 0.20 | -0.33 | 6.77E-01 | 5.82E-01 |
| 6 | rs1635     | 28227604 | T | 0.06 | -0.41 | 7.55E-01 | 7.67E-01 |
| 6 | rs9461446  | 28227633 | T | 0.05 | -1.41 | 3.41E-01 | 3.33E-01 |
| 6 | rs1778507  | 28230717 | A | 0.05 | -1.46 | 3.13E-01 | 3.14E-01 |
| 6 | rs2179174  | 28238969 | C | 0.20 | -0.42 | 5.92E-01 | 5.00E-01 |
| 6 | rs1419183  | 28242794 | G | 0.13 | 0.82  | 3.86E-01 | 4.06E-01 |
| 6 | rs1150724  | 28250236 | A | 0.33 | 0.22  | 7.42E-01 | 8.50E-01 |
| 6 | rs13211507 | 28257377 | C | 0.07 | 2.24  | 6.71E-02 | 7.04E-02 |
| 6 | rs9461448  | 28263721 | G | 0.05 | -1.97 | 1.69E-01 | 1.41E-01 |
| 6 | rs3800324  | 28264681 | A | 0.06 | 0.35  | 7.99E-01 | 7.38E-01 |
| 6 | rs2743554  | 28265640 | C | 0.06 | -1.59 | 2.22E-01 | 1.87E-01 |
| 6 | rs2281043  | 28268497 | A | 0.12 | 0.02  | 9.86E-01 | 8.83E-01 |
| 6 | rs1997660  | 28269663 | C | 0.30 | 0.39  | 5.63E-01 | 6.60E-01 |
| 6 | rs853693   | 28282648 | T | 0.30 | 0.35  | 6.03E-01 | 7.03E-01 |
| 6 | rs853690   | 28285482 | T | 0.30 | 0.35  | 6.03E-01 | 7.03E-01 |
| 6 | rs742107   | 28290714 | G | 0.06 | 0.34  | 8.06E-01 | 7.44E-01 |
| 6 | rs853684   | 28294550 | G | 0.38 | 0.65  | 3.13E-01 | 3.63E-01 |
| 6 | rs853679   | 28296863 | T | 0.13 | 0.56  | 5.49E-01 | 6.09E-01 |
| 6 | rs853676   | 28299687 | A | 0.13 | 0.65  | 4.91E-01 | 5.47E-01 |
| 6 | rs17312661 | 28300336 | G | 0.15 | 1.04  | 2.27E-01 | 2.68E-01 |
| 6 | rs7772827  | 28301143 | C | 0.25 | 0.87  | 2.24E-01 | 2.71E-01 |
| 6 | rs1416920  | 28302784 | C | 0.25 | 1.02  | 1.50E-01 | 1.86E-01 |
| 6 | rs6912584  | 28309590 | C | 0.20 | 0.84  | 2.79E-01 | 3.63E-01 |
| 6 | rs213240   | 28315875 | C | 0.38 | 0.73  | 2.55E-01 | 3.06E-01 |
| 6 | rs1474589  | 28321544 | A | 0.12 | -0.79 | 4.27E-01 | 3.18E-01 |
| 6 | rs6922111  | 28325308 | T | 0.18 | 0.37  | 6.44E-01 | 7.85E-01 |

|   |            |          |   |      |       |          |          |
|---|------------|----------|---|------|-------|----------|----------|
| 6 | rs213230   | 28330264 | G | 0.23 | 0.38  | 6.02E-01 | 7.00E-01 |
| 6 | rs213228   | 28331252 | G | 0.29 | 0.23  | 7.35E-01 | 8.79E-01 |
| 6 | rs12661831 | 28337769 | A | 0.11 | 0.94  | 3.55E-01 | 3.41E-01 |
| 6 | rs7774981  | 28346910 | C | 0.22 | 0.01  | 9.84E-01 | 8.58E-01 |
| 6 | rs1556957  | 28349926 | C | 0.05 | 0.39  | 7.80E-01 | 7.75E-01 |
| 6 | rs3799499  | 28354250 | A | 0.22 | 0.01  | 9.84E-01 | 8.58E-01 |
| 6 | rs1361385  | 28358320 | C | 0.28 | 0.11  | 8.76E-01 | 9.80E-01 |
| 6 | rs2232434  | 28358893 | G | 0.05 | 0.39  | 7.80E-01 | 7.75E-01 |
| 6 | rs2232430  | 28359186 | A | 0.08 | 1.49  | 1.81E-01 | 1.62E-01 |
| 6 | rs2232422  | 28366262 | T | 0.09 | -0.78 | 4.97E-01 | 4.10E-01 |
| 6 | rs2232419  | 28367768 | T | 0.04 | -0.23 | 8.82E-01 | 9.22E-01 |
| 6 | rs10484540 | 28387443 | G | 0.05 | 0.39  | 7.80E-01 | 7.75E-01 |
| 6 | rs3800328  | 28390843 | T | 0.27 | 0.10  | 8.85E-01 | 9.67E-01 |
| 6 | rs2859365  | 28391465 | G | 0.38 | 0.72  | 2.60E-01 | 3.22E-01 |
| 6 | rs11752919 | 28403603 | C | 0.36 | 0.41  | 5.30E-01 | 6.78E-01 |
| 6 | rs719370   | 28404353 | T | 0.02 | 1.73  | 4.54E-01 | 4.66E-01 |
| 6 | rs916403   | 28408258 | G | 0.46 | 0.99  | 1.14E-01 | 1.55E-01 |
| 6 | rs13190937 | 28411244 | A | 0.30 | 0.32  | 6.41E-01 | 8.12E-01 |
| 6 | rs13215804 | 28415572 | G | 0.30 | 0.33  | 6.28E-01 | 7.97E-01 |
| 6 | rs6903535  | 28417222 | G | 0.35 | 0.37  | 5.70E-01 | 7.24E-01 |
| 6 | rs2531809  | 28421368 | A | 0.16 | 1.62  | 5.75E-02 | 4.97E-02 |
| 6 | rs2859369  | 28421567 | T | 0.10 | 1.76  | 8.66E-02 | 7.42E-02 |
| 6 | rs2859374  | 28428145 | T | 0.16 | 1.74  | 4.14E-02 | 3.54E-02 |
| 6 | rs2531815  | 28436060 | T | 0.31 | 0.99  | 1.48E-01 | 1.71E-01 |
| 6 | rs12663002 | 28441634 | T | 0.14 | 1.36  | 1.27E-01 | 1.12E-01 |
| 6 | rs1029328  | 28447915 | C | 0.12 | 0.77  | 4.23E-01 | 4.89E-01 |
| 6 | rs1015811  | 28448086 | G | 0.27 | 1.04  | 1.35E-01 | 1.51E-01 |
| 6 | rs7770236  | 28450437 | A | 0.08 | 1.24  | 2.84E-01 | 2.67E-01 |
| 6 | rs2859355  | 28461221 | T | 0.33 | 1.29  | 5.57E-02 | 6.55E-02 |
| 6 | rs2191037  | 28466988 | C | 0.18 | 1.41  | 8.34E-02 | 6.91E-02 |
| 6 | rs406113   | 28483482 | C | 0.33 | 1.32  | 5.07E-02 | 5.99E-02 |
| 6 | rs11757000 | 28484869 | C | 0.15 | 0.58  | 5.16E-01 | 6.49E-01 |
| 6 | rs445870   | 28494327 | G | 0.30 | 1.56  | 2.30E-02 | 2.53E-02 |
| 6 | rs2064424  | 28495962 | C | 0.09 | 0.89  | 4.19E-01 | 3.79E-01 |

|   |            |          |   |      |       |          |          |
|---|------------|----------|---|------|-------|----------|----------|
| 6 | rs380879   | 28500449 | G | 0.09 | 1.45  | 1.84E-01 | 1.54E-01 |
| 6 | rs448450   | 28501006 | C | 0.09 | 1.45  | 1.84E-01 | 1.54E-01 |
| 6 | rs451774   | 28502550 | G | 0.29 | 1.05  | 1.26E-01 | 1.40E-01 |
| 6 | rs13215054 | 28502794 | A | 0.21 | 1.04  | 1.75E-01 | 2.24E-01 |
| 6 | rs392230   | 28504639 | G | 0.13 | 1.96  | 3.95E-02 | 3.41E-02 |
| 6 | rs2394102  | 28512017 | G | 0.11 | -0.94 | 3.60E-01 | 2.84E-01 |
| 6 | rs393414   | 28521316 | T | 0.22 | 1.50  | 4.84E-02 | 4.79E-02 |
| 6 | rs4711174  | 28532960 | A | 0.09 | 1.37  | 2.28E-01 | 2.07E-01 |
| 6 | rs442439   | 28573006 | A | 0.31 | 1.08  | 1.05E-01 | 1.53E-01 |
| 6 | rs911178   | 28574415 | T | 0.08 | 1.67  | 1.30E-01 | 1.26E-01 |
| 6 | rs13193532 | 28622914 | G | 0.11 | 1.75  | 6.72E-02 | 8.07E-02 |
| 6 | rs9295775  | 28627469 | G | 0.16 | 0.36  | 6.74E-01 | 7.18E-01 |
| 6 | rs13194504 | 28630691 | A | 0.07 | 2.49  | 4.13E-02 | 4.27E-02 |
| 6 | rs7767008  | 28630793 | G | 0.26 | 1.37  | 4.84E-02 | 6.51E-02 |
| 6 | rs4713175  | 28635592 | A | 0.09 | 0.19  | 8.66E-01 | 8.89E-01 |
| 6 | rs3864294  | 28641957 | G | 0.41 | -1.39 | 3.06E-02 | 3.61E-02 |
| 6 | rs9393921  | 28645170 | T | 0.44 | 1.55  | 1.46E-02 | 2.33E-02 |
| 6 | rs9885928  | 28650353 | A | 0.44 | 1.55  | 1.46E-02 | 2.33E-02 |
| 6 | rs1319075  | 28662521 | C | 0.43 | 1.62  | 1.14E-02 | 1.73E-02 |
| 6 | rs7382112  | 28665109 | G | 0.41 | 1.47  | 2.14E-02 | 3.03E-02 |
| 6 | rs6939576  | 28669315 | A | 0.29 | 1.80  | 8.21E-03 | 1.18E-02 |
| 6 | rs1107159  | 28671723 | C | 0.08 | 0.99  | 3.96E-01 | 4.22E-01 |
| 6 | rs9366725  | 28685981 | C | 0.48 | 0.68  | 2.70E-01 | 3.25E-01 |
| 6 | rs6909960  | 28688921 | A | 0.08 | 0.99  | 3.96E-01 | 4.22E-01 |
| 6 | rs9468413  | 28689672 | C | 0.14 | 0.62  | 4.86E-01 | 5.72E-01 |
| 6 | rs1954407  | 28695149 | G | 0.10 | 0.73  | 4.86E-01 | 5.17E-01 |
| 6 | rs7755641  | 28699369 | C | 0.05 | 1.80  | 2.20E-01 | 2.49E-01 |
| 6 | rs6456834  | 28700352 | T | 0.14 | 0.64  | 4.74E-01 | 5.60E-01 |
| 6 | rs7766599  | 28703432 | T | 0.06 | 1.76  | 2.00E-01 | 2.23E-01 |
| 6 | rs1233579  | 28712663 | G | 0.07 | 2.39  | 4.90E-02 | 5.13E-02 |
| 6 | rs1233585  | 28716345 | G | 0.15 | 1.77  | 4.13E-02 | 4.60E-02 |
| 6 | rs1233602  | 28733403 | G | 0.50 | -0.38 | 5.49E-01 | 6.25E-01 |
| 6 | rs1233615  | 28739584 | A | 0.47 | 0.61  | 3.37E-01 | 3.78E-01 |
| 6 | rs1233621  | 28747643 | C | 0.46 | 0.88  | 1.65E-01 | 1.92E-01 |



|   |            |          |   |      |       |          |          |
|---|------------|----------|---|------|-------|----------|----------|
| 6 | rs1233627  | 28751727 | C | 0.49 | 0.62  | 3.21E-01 | 3.87E-01 |
| 6 | rs9257181  | 28754520 | T | 0.28 | -0.43 | 5.34E-01 | 5.16E-01 |
| 6 | rs1810750  | 28762999 | C | 0.04 | 1.09  | 5.09E-01 | 5.36E-01 |
| 6 | rs7767099  | 28768698 | T | 0.07 | 2.42  | 4.29E-02 | 4.38E-02 |
| 6 | rs4324798  | 28776117 | A | 0.07 | 2.45  | 4.01E-02 | 4.08E-02 |
| 6 | rs209181   | 28792477 | T | 0.11 | 2.01  | 3.64E-02 | 4.01E-02 |
| 6 | rs4713182  | 28833225 | A | 0.09 | 0.91  | 3.94E-01 | 4.26E-01 |
| 6 | rs3131093  | 28837437 | T | 0.07 | 2.42  | 4.29E-02 | 4.38E-02 |
| 6 | rs209160   | 28839879 | C | 0.50 | 0.67  | 2.82E-01 | 3.33E-01 |
| 6 | rs209152   | 28846462 | C | 0.47 | 0.60  | 3.41E-01 | 3.99E-01 |
| 6 | rs1016472  | 28851367 | C | 0.27 | -0.79 | 2.67E-01 | 2.47E-01 |
| 6 | rs9257319  | 28851637 | G | 0.16 | -1.24 | 1.57E-01 | 1.72E-01 |
| 6 | rs209139   | 28863483 | T | 0.05 | 0.21  | 8.84E-01 | 9.48E-01 |
| 6 | rs2269553  | 28876509 | A | 0.22 | -0.91 | 2.36E-01 | 2.32E-01 |
| 6 | rs2894066  | 28893927 | A | 0.37 | 0.29  | 6.57E-01 | 7.07E-01 |
| 6 | rs3763338  | 28894311 | T | 0.10 | 0.75  | 4.77E-01 | 5.17E-01 |
| 6 | rs2071790  | 28911802 | T | 0.49 | 0.46  | 4.65E-01 | 5.41E-01 |
| 6 | rs2071789  | 28912076 | A | 0.16 | -0.95 | 2.74E-01 | 2.93E-01 |
| 6 | rs2071788  | 28912307 | A | 0.09 | 0.74  | 4.94E-01 | 5.33E-01 |
| 6 | rs9257403  | 28916972 | T | 0.32 | -0.27 | 6.90E-01 | 6.55E-01 |
| 6 | rs1476016  | 28922719 | T | 0.49 | 0.55  | 3.83E-01 | 4.54E-01 |
| 6 | rs9257425  | 28936556 | G | 0.29 | -0.83 | 2.39E-01 | 2.09E-01 |
| 6 | rs3135322  | 28946920 | G | 0.49 | 0.57  | 3.61E-01 | 4.31E-01 |
| 6 | rs3130837  | 28948092 | T | 0.07 | 2.52  | 3.50E-02 | 3.50E-02 |
| 6 | rs3129791  | 28954293 | A | 0.07 | 2.63  | 2.73E-02 | 2.71E-02 |
| 6 | rs6456880  | 28963248 | G | 0.42 | -0.15 | 8.13E-01 | 7.12E-01 |
| 6 | rs9257453  | 28968930 | G | 0.09 | -2.45 | 2.51E-02 | 2.47E-02 |
| 6 | rs9295784  | 28969148 | C | 0.04 | 1.36  | 3.75E-01 | 4.12E-01 |
| 6 | rs6923005  | 28976071 | C | 0.26 | -0.11 | 8.77E-01 | 8.10E-01 |
| 6 | rs3130893  | 28980707 | G | 0.07 | 2.62  | 2.78E-02 | 2.76E-02 |
| 6 | rs6930903  | 28981244 | G | 0.26 | -0.15 | 8.29E-01 | 7.63E-01 |
| 6 | rs2394512  | 28992184 | G | 0.41 | -0.18 | 7.76E-01 | 6.68E-01 |
| 6 | rs7741520  | 28994570 | G | 0.24 | -0.15 | 8.32E-01 | 7.39E-01 |
| 6 | rs10484544 | 28995719 | C | 0.16 | -0.17 | 8.40E-01 | 8.02E-01 |

|   |            |          |   |      |       |          |          |
|---|------------|----------|---|------|-------|----------|----------|
| 6 | rs16894557 | 28999826 | A | 0.08 | 1.01  | 3.93E-01 | 3.70E-01 |
| 6 | rs6456889  | 29010824 | C | 0.24 | -0.19 | 7.92E-01 | 7.05E-01 |
| 6 | rs7341218  | 29012116 | A | 0.16 | -0.23 | 7.84E-01 | 7.43E-01 |
| 6 | rs2143574  | 29014026 | T | 0.41 | -0.11 | 8.67E-01 | 7.43E-01 |
| 6 | rs9501294  | 29021017 | A | 0.16 | 1.29  | 1.23E-01 | 1.50E-01 |
| 6 | rs7747023  | 29025680 | G | 0.16 | 1.25  | 1.34E-01 | 1.62E-01 |
| 6 | rs3117143  | 29031142 | A | 0.07 | 2.50  | 3.67E-02 | 3.60E-02 |
| 6 | rs9348821  | 29047203 | G | 0.16 | 1.25  | 1.34E-01 | 1.62E-01 |
| 6 | rs7752270  | 29053998 | A | 0.08 | -2.83 | 1.48E-02 | 1.28E-02 |
| 6 | rs2142905  | 29064772 | C | 0.16 | 0.08  | 9.24E-01 | 9.81E-01 |
| 6 | rs4713201  | 29067263 | C | 0.09 | 0.90  | 3.97E-01 | 4.22E-01 |
| 6 | rs3129106  | 29081161 | G | 0.16 | -0.03 | 9.73E-01 | 8.82E-01 |
| 6 | rs3129110  | 29085228 | G | 0.41 | -0.03 | 9.63E-01 | 8.33E-01 |
| 6 | rs3130778  | 29099579 | T | 0.40 | -0.01 | 9.86E-01 | 8.53E-01 |
| 6 | rs9295794  | 29104935 | A | 0.09 | 0.90  | 3.97E-01 | 4.22E-01 |
| 6 | rs3130718  | 29114621 | G | 0.48 | 0.70  | 2.62E-01 | 3.37E-01 |
| 6 | rs3116847  | 29118813 | C | 0.15 | 0.24  | 7.87E-01 | 8.48E-01 |
| 6 | rs3130729  | 29125747 | G | 0.48 | 0.70  | 2.61E-01 | 3.37E-01 |
| 6 | rs3129157  | 29141743 | A | 0.03 | -2.00 | 2.61E-01 | 2.14E-01 |
| 6 | rs3116817  | 29149561 | G | 0.43 | 0.56  | 3.80E-01 | 4.59E-01 |
| 6 | rs1883329  | 29177102 | T | 0.23 | -0.92 | 2.21E-01 | 1.86E-01 |
| 6 | rs2206040  | 29178514 | T | 0.48 | 0.73  | 2.40E-01 | 3.11E-01 |
| 6 | rs2206041  | 29178606 | T | 0.48 | 0.73  | 2.40E-01 | 3.11E-01 |
| 6 | rs3130817  | 29179237 | G | 0.18 | 1.75  | 2.69E-02 | 3.06E-02 |
| 6 | rs3130826  | 29181314 | G | 0.23 | -0.92 | 2.21E-01 | 1.86E-01 |
| 6 | rs3116837  | 29184660 | T | 0.23 | -0.92 | 2.21E-01 | 1.86E-01 |
| 6 | rs3129105  | 29213070 | A | 0.48 | 0.60  | 3.36E-01 | 4.25E-01 |
| 6 | rs3117328  | 29230577 | G | 0.45 | 0.51  | 4.12E-01 | 4.97E-01 |
| 6 | rs3130827  | 29230683 | T | 0.34 | 1.09  | 9.91E-02 | 1.20E-01 |
| 6 | rs6904130  | 29235193 | C | 0.08 | -2.31 | 5.09E-02 | 4.45E-02 |
| 6 | rs7766902  | 29236645 | T | 0.11 | 0.34  | 7.25E-01 | 7.70E-01 |
| 6 | rs3130830  | 29236722 | G | 0.45 | 0.55  | 3.77E-01 | 4.57E-01 |
| 6 | rs3117326  | 29240378 | A | 0.07 | 2.52  | 3.50E-02 | 3.50E-02 |
| 6 | rs9468508  | 29253756 | T | 0.04 | 1.38  | 3.85E-01 | 4.16E-01 |

|   |            |          |   |      |       |          |          |
|---|------------|----------|---|------|-------|----------|----------|
| 6 | rs1884123  | 29256420 | T | 0.34 | 1.14  | 8.23E-02 | 1.01E-01 |
| 6 | rs1033569  | 29257772 | G | 0.37 | 1.03  | 1.07E-01 | 1.32E-01 |
| 6 | rs16867628 | 29266497 | A | 0.08 | 1.26  | 2.85E-01 | 2.72E-01 |
| 6 | rs4594993  | 29270498 | G | 0.09 | -1.63 | 1.31E-01 | 1.15E-01 |
| 6 | rs3117426  | 29272012 | T | 0.18 | 1.38  | 8.31E-02 | 9.18E-02 |
| 6 | rs9257694  | 29274486 | T | 0.45 | 0.71  | 2.60E-01 | 3.20E-01 |
| 6 | rs17404424 | 29275298 | A | 0.04 | -1.34 | 3.80E-01 | 3.37E-01 |
| 6 | rs9257696  | 29275507 | C | 0.16 | -0.01 | 9.86E-01 | 9.40E-01 |
| 6 | rs10456370 | 29280736 | C | 0.49 | -0.78 | 2.17E-01 | 2.52E-01 |
| 6 | rs4713208  | 29283579 | T | 0.35 | 0.45  | 4.87E-01 | 5.86E-01 |
| 6 | rs720831   | 29284518 | T | 0.35 | 0.46  | 4.71E-01 | 5.67E-01 |
| 6 | rs12660111 | 29296148 | T | 0.15 | 0.43  | 6.28E-01 | 5.78E-01 |
| 6 | rs9357078  | 29297666 | T | 0.11 | 0.06  | 9.50E-01 | 1.00E+00 |
| 6 | rs6930435  | 29301222 | A | 0.20 | 0.70  | 3.56E-01 | 4.17E-01 |
| 6 | rs1014258  | 29310681 | A | 0.20 | 0.69  | 3.66E-01 | 4.29E-01 |
| 6 | rs6930033  | 29323905 | C | 0.15 | 0.53  | 5.45E-01 | 4.96E-01 |
| 6 | rs10484546 | 29324599 | C | 0.15 | 0.50  | 5.72E-01 | 5.22E-01 |
| 6 | rs9380120  | 29335537 | C | 0.11 | 0.09  | 9.27E-01 | 9.76E-01 |
| 6 | rs9257794  | 29335661 | T | 0.19 | 2.04  | 9.08E-03 | 8.31E-03 |
| 6 | rs6934993  | 29337500 | G | 0.19 | 2.02  | 9.91E-03 | 9.17E-03 |
| 6 | rs7753474  | 29341308 | A | 0.21 | -0.25 | 7.36E-01 | 6.96E-01 |
| 6 | rs3749971  | 29342775 | T | 0.08 | 2.09  | 7.28E-02 | 7.09E-02 |
| 6 | rs9257802  | 29343355 | T | 0.17 | 0.83  | 3.15E-01 | 3.18E-01 |
| 6 | rs4598109  | 29344704 | C | 0.49 | 0.97  | 1.27E-01 | 1.54E-01 |
| 6 | rs238883   | 29346226 | C | 0.31 | 0.67  | 3.21E-01 | 3.61E-01 |
| 6 | rs238872   | 29351873 | G | 0.43 | 0.83  | 1.90E-01 | 2.22E-01 |
| 6 | rs3094556  | 29353408 | A | 0.43 | 0.73  | 2.49E-01 | 2.87E-01 |
| 6 | rs3094551  | 29354799 | T | 0.39 | 0.70  | 2.78E-01 | 3.00E-01 |
| 6 | rs3094550  | 29354809 | G | 0.39 | 0.71  | 2.71E-01 | 2.92E-01 |
| 6 | rs238869   | 29355113 | G | 0.32 | 0.98  | 1.46E-01 | 1.69E-01 |
| 6 | rs3094549  | 29355148 | G | 0.32 | -0.12 | 8.63E-01 | 8.50E-01 |
| 6 | rs1419638  | 29355519 | A | 0.37 | -0.36 | 5.81E-01 | 4.90E-01 |
| 6 | rs4711185  | 29356046 | A | 0.42 | -0.82 | 1.93E-01 | 1.92E-01 |
| 6 | rs9257809  | 29356331 | G | 0.08 | 2.77  | 1.66E-02 | 1.60E-02 |

|   |            |          |   |      |       |          |          |
|---|------------|----------|---|------|-------|----------|----------|
| 6 | rs379157   | 29356587 | C | 0.42 | 0.81  | 2.02E-01 | 2.33E-01 |
| 6 | rs9393956  | 29357645 | G | 0.05 | -1.45 | 3.05E-01 | 3.33E-01 |
| 6 | rs16894836 | 29361707 | G | 0.13 | -0.31 | 7.45E-01 | 7.52E-01 |
| 6 | rs1028411  | 29367399 | C | 0.47 | -0.75 | 2.25E-01 | 2.10E-01 |
| 6 | rs9257837  | 29368021 | T | 0.15 | -0.52 | 5.45E-01 | 5.02E-01 |
| 6 | rs9257843  | 29368665 | C | 0.49 | -0.45 | 4.65E-01 | 4.30E-01 |
| 6 | rs9405124  | 29368813 | G | 0.32 | -0.67 | 3.24E-01 | 3.33E-01 |
| 6 | rs2394604  | 29369268 | A | 0.15 | -0.34 | 6.90E-01 | 6.38E-01 |
| 6 | rs1419633  | 29373213 | A | 0.49 | -0.51 | 4.15E-01 | 3.80E-01 |
| 6 | rs1419632  | 29373249 | G | 0.49 | -0.49 | 4.33E-01 | 3.98E-01 |
| 6 | rs3131024  | 29385237 | T | 0.10 | 0.40  | 7.20E-01 | 7.42E-01 |
| 6 | rs2523421  | 29390440 | C | 0.10 | -0.83 | 4.31E-01 | 4.93E-01 |
| 6 | rs7770592  | 29395747 | A | 0.34 | -0.27 | 6.80E-01 | 6.69E-01 |
| 6 | rs9295805  | 29397779 | T | 0.32 | -0.70 | 3.04E-01 | 3.11E-01 |
| 6 | rs3131025  | 29398815 | A | 0.30 | -0.46 | 5.04E-01 | 4.76E-01 |
| 6 | rs2074469  | 29407970 | G | 0.18 | 0.29  | 7.22E-01 | 7.73E-01 |
| 6 | rs2074466  | 29408313 | T | 0.15 | -0.37 | 6.63E-01 | 6.21E-01 |
| 6 | rs2074464  | 29408528 | T | 0.47 | -0.73 | 2.57E-01 | 2.60E-01 |
| 6 | rs7765791  | 29410093 | C | 0.03 | 0.85  | 6.55E-01 | 7.06E-01 |
| 6 | rs2523442  | 29417817 | G | 0.25 | -0.24 | 7.38E-01 | 7.96E-01 |
| 6 | rs9257863  | 29425584 | G | 0.15 | -0.31 | 7.18E-01 | 6.69E-01 |
| 6 | rs2107191  | 29434295 | G | 0.45 | -0.73 | 2.52E-01 | 2.70E-01 |
| 6 | rs4713226  | 29434414 | A | 0.10 | -0.46 | 6.51E-01 | 6.41E-01 |
| 6 | rs1362076  | 29441169 | A | 0.01 | 0.40  | 8.92E-01 | 9.31E-01 |
| 6 | rs7751705  | 29441618 | T | 0.03 | -0.97 | 6.15E-01 | 5.36E-01 |
| 6 | rs2746150  | 29442701 | T | 0.08 | 2.65  | 2.29E-02 | 2.24E-02 |
| 6 | rs2523444  | 29442831 | T | 0.07 | -1.29 | 2.97E-01 | 3.39E-01 |
| 6 | rs1233492  | 29458477 | C | 0.26 | -0.16 | 8.17E-01 | 8.79E-01 |
| 6 | rs6906307  | 29463892 | G | 0.03 | -0.72 | 7.13E-01 | 6.29E-01 |
| 6 | rs1345227  | 29466956 | G | 0.40 | -0.59 | 3.68E-01 | 3.75E-01 |
| 6 | rs7746192  | 29468207 | T | 0.01 | -0.86 | 7.71E-01 | 7.56E-01 |
| 6 | rs1233487  | 29468809 | C | 0.23 | 0.85  | 2.42E-01 | 2.68E-01 |
| 6 | rs757256   | 29472916 | A | 0.42 | 0.89  | 1.64E-01 | 1.43E-01 |
| 6 | rs734959   | 29474662 | C | 0.41 | -0.53 | 4.14E-01 | 4.23E-01 |

|   |            |          |   |      |       |          |          |
|---|------------|----------|---|------|-------|----------|----------|
| 6 | rs3131020  | 29475902 | T | 0.42 | 0.88  | 1.67E-01 | 1.47E-01 |
| 6 | rs3131021  | 29476142 | A | 0.43 | -0.71 | 2.66E-01 | 2.51E-01 |
| 6 | rs3094572  | 29480993 | A | 0.41 | -0.69 | 2.88E-01 | 2.94E-01 |
| 6 | rs1592411  | 29483911 | A | 0.43 | 0.63  | 3.25E-01 | 3.07E-01 |
| 6 | rs3094564  | 29486345 | G | 0.41 | -0.62 | 3.38E-01 | 3.43E-01 |
| 6 | rs969931   | 29494897 | C | 0.49 | 0.57  | 3.56E-01 | 3.78E-01 |
| 6 | rs9501676  | 29496776 | A | 0.01 | 2.10  | 4.25E-01 | 4.98E-01 |
| 6 | rs9501677  | 29497002 | A | 0.03 | 1.13  | 5.42E-01 | 6.65E-01 |
| 6 | rs909968   | 29499505 | A | 0.45 | 0.39  | 5.36E-01 | 5.24E-01 |
| 6 | rs9461533  | 29501422 | G | 0.02 | 2.68  | 3.03E-01 | 3.61E-01 |
| 6 | rs446198   | 29507426 | A | 0.46 | 0.49  | 4.37E-01 | 4.34E-01 |
| 6 | rs2534795  | 29511341 | A | 0.26 | -0.28 | 6.93E-01 | 7.36E-01 |
| 6 | rs3094575  | 29515802 | T | 0.25 | -0.52 | 4.72E-01 | 4.44E-01 |
| 6 | rs3094576  | 29516242 | A | 0.14 | -0.61 | 5.10E-01 | 5.08E-01 |
| 6 | rs376681   | 29517093 | C | 0.46 | 0.46  | 4.61E-01 | 4.56E-01 |
| 6 | rs17351888 | 29519173 | C | 0.07 | -0.49 | 6.92E-01 | 6.18E-01 |
| 6 | rs2534790  | 29524168 | A | 0.26 | -0.47 | 5.07E-01 | 5.49E-01 |
| 6 | rs2745412  | 29524401 | T | 0.07 | -1.63 | 1.83E-01 | 2.13E-01 |
| 6 | rs2272991  | 29527599 | G | 0.03 | 1.26  | 4.69E-01 | 5.78E-01 |
| 6 | rs362511   | 29530850 | C | 0.22 | -0.54 | 4.76E-01 | 5.01E-01 |
| 6 | rs362529   | 29530868 | A | 0.15 | -0.38 | 6.69E-01 | 6.24E-01 |
| 6 | rs459970   | 29531253 | T | 0.08 | -1.61 | 1.63E-01 | 1.70E-01 |
| 6 | rs388234   | 29533295 | G | 0.36 | 0.04  | 9.56E-01 | 9.51E-01 |
| 6 | rs3094577  | 29533870 | A | 0.41 | -0.62 | 3.42E-01 | 3.45E-01 |
| 6 | rs1235162  | 29537224 | C | 0.08 | 2.49  | 2.93E-02 | 2.97E-02 |
| 6 | rs1233400  | 29537975 | T | 0.17 | -0.14 | 8.74E-01 | 9.29E-01 |
| 6 | rs1233399  | 29539482 | T | 0.21 | 0.19  | 8.09E-01 | 7.53E-01 |
| 6 | rs3025652  | 29539765 | T | 0.14 | -0.90 | 3.38E-01 | 2.99E-01 |
| 6 | rs362510   | 29540745 | A | 0.21 | 0.17  | 8.25E-01 | 7.63E-01 |
| 6 | rs3117073  | 29544825 | G | 0.31 | -1.26 | 6.72E-02 | 7.57E-02 |
| 6 | rs1233397  | 29545715 | C | 0.23 | -0.04 | 9.57E-01 | 9.71E-01 |
| 6 | rs12530421 | 29549443 | C | 0.05 | 0.24  | 8.66E-01 | 9.31E-01 |
| 6 | rs1233391  | 29550618 | G | 0.20 | 0.33  | 6.67E-01 | 6.59E-01 |
| 6 | rs362521   | 29556759 | A | 0.05 | -0.28 | 8.49E-01 | 7.67E-01 |

|   |            |          |   |      |       |          |          |
|---|------------|----------|---|------|-------|----------|----------|
| 6 | rs1233386  | 29558190 | A | 0.14 | 0.06  | 9.44E-01 | 9.03E-01 |
| 6 | rs1233384  | 29559295 | A | 0.14 | 0.06  | 9.44E-01 | 9.03E-01 |
| 6 | rs3025646  | 29566842 | G | 0.05 | -0.48 | 7.31E-01 | 6.50E-01 |
| 6 | rs3025643  | 29569955 | T | 0.37 | -1.64 | 1.32E-02 | 1.42E-02 |
| 6 | rs3025642  | 29570316 | T | 0.04 | 4.41  | 8.89E-03 | 6.69E-03 |
| 6 | rs2267633  | 29570841 | G | 0.10 | 2.00  | 6.30E-02 | 6.39E-02 |
| 6 | rs2076483  | 29571545 | C | 0.10 | 2.02  | 6.13E-02 | 6.22E-02 |
| 6 | rs10946999 | 29571609 | T | 0.11 | 0.23  | 8.19E-01 | 8.05E-01 |
| 6 | rs740884   | 29574631 | T | 0.05 | 2.06  | 1.43E-01 | 1.33E-01 |
| 6 | rs740882   | 29575456 | A | 0.08 | 3.17  | 5.88E-03 | 4.28E-03 |
| 6 | rs29230    | 29576393 | C | 0.14 | 2.00  | 3.02E-02 | 2.92E-02 |
| 6 | rs29225    | 29581041 | C | 0.08 | 3.17  | 5.88E-03 | 4.28E-03 |
| 6 | rs29246    | 29588146 | C | 0.04 | 1.59  | 3.23E-01 | 3.13E-01 |
| 6 | rs1233374  | 29608694 | G | 0.08 | 2.40  | 4.60E-02 | 3.52E-02 |
| 6 | rs29232    | 29611431 | A | 0.35 | -1.31 | 4.56E-02 | 4.10E-02 |
| 6 | rs3131854  | 29611885 | A | 0.21 | -0.11 | 8.94E-01 | 8.58E-01 |
| 6 | rs3129073  | 29615822 | C | 0.16 | 1.41  | 9.12E-02 | 9.37E-02 |
| 6 | rs29234    | 29624112 | G | 0.04 | 5.22  | 9.76E-04 | 1.04E-03 |
| 6 | rs3135050  | 29628437 | T | 0.16 | -0.23 | 7.91E-01 | 7.85E-01 |
| 6 | rs3130252  | 29631744 | C | 0.16 | -0.19 | 8.30E-01 | 8.22E-01 |
| 6 | rs3130253  | 29634012 | A | 0.09 | -0.23 | 8.35E-01 | 8.52E-01 |
| 6 | rs1318631  | 29635508 | A | 0.29 | -0.40 | 5.66E-01 | 5.69E-01 |
| 6 | rs2071653  | 29635928 | T | 0.20 | -0.14 | 8.59E-01 | 8.25E-01 |
| 6 | rs2535246  | 29636409 | C | 0.19 | -2.41 | 2.48E-03 | 2.50E-03 |
| 6 | rs9257936  | 29639776 | T | 0.13 | -1.05 | 2.62E-01 | 3.08E-01 |
| 6 | rs9257940  | 29642509 | G | 0.03 | 0.09  | 9.62E-01 | 9.91E-01 |
| 6 | rs2535238  | 29645038 | T | 0.19 | 1.44  | 7.25E-02 | 7.43E-02 |
| 6 | rs2747430  | 29648506 | A | 0.25 | 2.54  | 6.33E-04 | 5.82E-04 |
| 6 | rs3129054  | 29649056 | A | 0.32 | -0.50 | 4.56E-01 | 4.77E-01 |
| 6 | rs3117292  | 29652199 | G | 0.37 | 0.05  | 9.36E-01 | 8.97E-01 |
| 6 | rs3117294  | 29653329 | G | 0.33 | -0.15 | 8.17E-01 | 8.50E-01 |
| 6 | rs2747453  | 29654943 | C | 0.18 | -2.24 | 5.87E-03 | 6.39E-03 |
| 6 | rs2747454  | 29655113 | A | 0.26 | -1.74 | 1.59E-02 | 1.58E-02 |
| 6 | rs2747457  | 29656417 | G | 0.19 | 1.33  | 9.45E-02 | 9.64E-02 |

|   |            |          |   |      |       |          |          |
|---|------------|----------|---|------|-------|----------|----------|
| 6 | rs3131888  | 29663889 | G | 0.39 | -0.43 | 4.98E-01 | 4.85E-01 |
| 6 | rs3131875  | 29666111 | G | 0.50 | 0.77  | 2.28E-01 | 2.28E-01 |
| 6 | rs7776082  | 29667273 | A | 0.41 | -0.07 | 9.06E-01 | 8.88E-01 |
| 6 | rs3129066  | 29668537 | C | 0.21 | 1.77  | 2.30E-02 | 2.35E-02 |
| 6 | rs3129055  | 29670261 | C | 0.21 | 1.77  | 2.30E-02 | 2.35E-02 |
| 6 | rs3131863  | 29673483 | C | 0.26 | 0.82  | 2.46E-01 | 2.54E-01 |
| 6 | rs3871468  | 29677641 | G | 0.29 | -0.49 | 4.83E-01 | 4.84E-01 |
| 6 | rs1610594  | 29679047 | G | 0.26 | 0.81  | 2.47E-01 | 2.55E-01 |
| 6 | rs1611371  | 29680021 | C | 0.22 | 0.13  | 8.69E-01 | 9.14E-01 |
| 6 | rs9258170  | 29689590 | G | 0.10 | 1.93  | 6.89E-02 | 6.96E-02 |
| 6 | rs1362126  | 29691019 | T | 0.47 | -1.53 | 1.44E-02 | 1.48E-02 |
| 6 | rs9258186  | 29692334 | G | 0.10 | 1.93  | 6.89E-02 | 6.96E-02 |
| 6 | rs2235383  | 29693499 | C | 0.10 | 1.93  | 6.89E-02 | 6.96E-02 |
| 6 | rs2523404  | 29695713 | G | 0.49 | 1.61  | 1.02E-02 | 1.06E-02 |
| 6 | rs2272874  | 29696245 | G | 0.10 | 1.93  | 6.89E-02 | 6.96E-02 |
| 6 | rs2743925  | 29698050 | C | 0.20 | -1.67 | 3.54E-02 | 3.96E-02 |
| 6 | rs1611350  | 29698821 | C | 0.27 | 0.48  | 4.92E-01 | 4.98E-01 |
| 6 | rs2523399  | 29700079 | G | 0.41 | 0.59  | 3.57E-01 | 3.60E-01 |
| 6 | rs1610601  | 29700183 | T | 0.20 | 0.80  | 3.09E-01 | 3.18E-01 |
| 6 | rs7773358  | 29701800 | T | 0.09 | 1.82  | 9.31E-02 | 8.98E-02 |
| 6 | rs1610602  | 29702061 | T | 0.23 | 0.70  | 3.40E-01 | 3.45E-01 |
| 6 | rs2844833  | 29702206 | C | 0.18 | -2.09 | 1.07E-02 | 1.15E-02 |
| 6 | rs2523395  | 29702510 | T | 0.50 | -1.15 | 6.34E-02 | 6.33E-02 |
| 6 | rs2394160  | 29703262 | A | 0.50 | 1.16  | 6.18E-02 | 6.14E-02 |
| 6 | rs9258209  | 29705402 | T | 0.02 | 1.31  | 5.55E-01 | 5.89E-01 |
| 6 | rs932338   | 29706933 | T | 0.18 | 0.05  | 9.55E-01 | 9.46E-01 |
| 6 | rs1633096  | 29707267 | A | 0.21 | 0.65  | 3.86E-01 | 3.84E-01 |
| 6 | rs9258218  | 29708028 | A | 0.09 | 1.82  | 9.24E-02 | 8.91E-02 |
| 6 | rs1610603  | 29708222 | A | 0.18 | 0.10  | 9.05E-01 | 9.01E-01 |
| 6 | rs2517938  | 29709840 | G | 0.19 | -1.81 | 2.63E-02 | 2.64E-02 |
| 6 | rs2523386  | 29711747 | T | 0.18 | -1.99 | 1.72E-02 | 1.96E-02 |
| 6 | rs9258225  | 29712704 | G | 0.08 | 2.81  | 1.69E-02 | 1.63E-02 |
| 6 | rs1633091  | 29712866 | A | 0.18 | 0.10  | 9.08E-01 | 9.07E-01 |
| 6 | rs34260811 | 29715332 | A | 0.30 | -0.33 | 6.32E-01 | 6.25E-01 |

|   |            |          |   |      |       |          |          |
|---|------------|----------|---|------|-------|----------|----------|
| 6 | rs1633085  | 29715997 | A | 0.48 | -0.33 | 5.91E-01 | 5.83E-01 |
| 6 | rs1610621  | 29718790 | T | 0.20 | 0.68  | 3.84E-01 | 3.95E-01 |
| 6 | rs909728   | 29719561 | A | 0.48 | -0.28 | 6.52E-01 | 6.43E-01 |
| 6 | rs4713244  | 29721146 | A | 0.30 | -0.42 | 5.39E-01 | 5.30E-01 |
| 6 | rs1611297  | 29721755 | C | 0.18 | 0.15  | 8.56E-01 | 8.56E-01 |
| 6 | rs17438538 | 29723144 | C | 0.03 | -2.90 | 1.09E-01 | 1.00E-01 |
| 6 | rs9258260  | 29723161 | T | 0.07 | 2.97  | 1.35E-02 | 1.27E-02 |
| 6 | rs1633068  | 29724310 | A | 0.18 | 0.15  | 8.56E-01 | 8.56E-01 |
| 6 | rs1737078  | 29724939 | A | 0.44 | -0.79 | 2.03E-01 | 2.06E-01 |
| 6 | rs1737076  | 29725321 | C | 0.44 | -0.79 | 2.03E-01 | 2.06E-01 |
| 6 | rs1633059  | 29726550 | A | 0.48 | -0.29 | 6.39E-01 | 6.69E-01 |
| 6 | rs1610628  | 29728209 | G | 0.18 | 0.13  | 8.74E-01 | 8.73E-01 |
| 6 | rs1610630  | 29729286 | G | 0.18 | 0.15  | 8.56E-01 | 8.56E-01 |
| 6 | rs9258275  | 29730504 | G | 0.39 | 0.82  | 2.11E-01 | 2.13E-01 |
| 6 | rs1633048  | 29730642 | T | 0.18 | 0.15  | 8.56E-01 | 8.56E-01 |
| 6 | rs1737069  | 29730730 | A | 0.25 | 1.23  | 8.87E-02 | 8.71E-02 |
| 6 | rs1611285  | 29731787 | C | 0.19 | -1.90 | 1.91E-02 | 1.99E-02 |
| 6 | rs1737060  | 29732969 | C | 0.18 | 0.20  | 8.07E-01 | 8.09E-01 |
| 6 | rs1633041  | 29733223 | T | 0.25 | 0.49  | 4.94E-01 | 4.99E-01 |
| 6 | rs1737058  | 29733375 | C | 0.07 | -0.18 | 8.90E-01 | 8.63E-01 |
| 6 | rs2735046  | 29734098 | T | 0.47 | -0.59 | 3.48E-01 | 3.29E-01 |
| 6 | rs1737046  | 29735693 | T | 0.27 | -0.09 | 8.98E-01 | 9.31E-01 |
| 6 | rs1737041  | 29736229 | T | 0.25 | 0.46  | 5.20E-01 | 5.27E-01 |
| 6 | rs11753872 | 29736942 | A | 0.02 | 5.30  | 2.97E-02 | 2.82E-02 |
| 6 | rs1737031  | 29737481 | A | 0.26 | 0.79  | 2.61E-01 | 2.68E-01 |
| 6 | rs6932033  | 29737846 | G | 0.02 | 5.30  | 2.97E-02 | 2.82E-02 |
| 6 | rs12662393 | 29738569 | T | 0.03 | 4.12  | 3.86E-02 | 4.45E-02 |
| 6 | rs9258302  | 29741338 | C | 0.06 | -2.05 | 1.17E-01 | 1.22E-01 |
| 6 | rs1362070  | 29742299 | G | 0.30 | 1.44  | 3.14E-02 | 3.37E-02 |
| 6 | rs9258303  | 29742930 | T | 0.06 | -2.05 | 1.17E-01 | 1.22E-01 |
| 6 | rs9500845  | 29743117 | G | 0.03 | 4.12  | 3.86E-02 | 4.45E-02 |
| 6 | rs2517930  | 29745075 | A | 0.41 | -0.58 | 3.46E-01 | 3.47E-01 |
| 6 | rs2844836  | 29746023 | G | 0.03 | -2.95 | 8.72E-02 | 7.68E-02 |
| 6 | rs1633021  | 29746869 | G | 0.20 | 0.90  | 2.37E-01 | 2.52E-01 |



|   |            |          |   |      |       |          |          |
|---|------------|----------|---|------|-------|----------|----------|
| 6 | rs2735042  | 29747373 | C | 0.26 | 0.92  | 1.88E-01 | 1.89E-01 |
| 6 | rs17185076 | 29747389 | T | 0.04 | 4.57  | 3.15E-03 | 3.43E-03 |
| 6 | rs2394686  | 29749292 | G | 0.03 | -2.89 | 1.46E-01 | 1.41E-01 |
| 6 | rs1002046  | 29754016 | T | 0.25 | 0.48  | 5.03E-01 | 5.09E-01 |
| 6 | rs1610642  | 29759078 | A | 0.29 | 1.33  | 4.86E-02 | 5.14E-02 |
| 6 | rs1610644  | 29759445 | A | 0.24 | 0.35  | 6.25E-01 | 6.28E-01 |
| 6 | rs17185132 | 29759511 | T | 0.02 | 3.34  | 1.14E-01 | 1.33E-01 |
| 6 | rs35728173 | 29761652 | T | 0.02 | 5.30  | 2.97E-02 | 2.82E-02 |
| 6 | rs16895757 | 29762178 | T | 0.05 | 3.06  | 4.24E-02 | 3.43E-02 |
| 6 | rs1633011  | 29762693 | A | 0.25 | 0.51  | 4.77E-01 | 4.83E-01 |
| 6 | rs11758087 | 29764443 | A | 0.02 | 5.30  | 2.97E-02 | 2.82E-02 |
| 6 | rs2523414  | 29765087 | G | 0.06 | -0.19 | 8.84E-01 | 8.92E-01 |
| 6 | rs1736991  | 29766926 | G | 0.27 | 0.96  | 1.67E-01 | 1.70E-01 |
| 6 | rs9258437  | 29767611 | A | 0.02 | -0.10 | 9.65E-01 | 9.59E-01 |
| 6 | rs28634576 | 29767743 | G | 0.02 | 3.69  | 7.42E-02 | 8.80E-02 |
| 6 | rs7741100  | 29768123 | A | 0.05 | -1.20 | 4.25E-01 | 4.44E-01 |
| 6 | rs1611185  | 29768344 | C | 0.48 | -0.50 | 4.20E-01 | 4.29E-01 |
| 6 | rs2017525  | 29768503 | A | 0.05 | -1.22 | 3.67E-01 | 4.02E-01 |
| 6 | rs1632988  | 29772395 | T | 0.23 | 0.29  | 7.00E-01 | 7.16E-01 |
| 6 | rs17178826 | 29773537 | G | 0.02 | 5.30  | 2.97E-02 | 2.82E-02 |
| 6 | rs9468630  | 29773541 | A | 0.03 | 3.78  | 5.66E-02 | 6.35E-02 |
| 6 | rs9258447  | 29773852 | T | 0.07 | -0.89 | 4.55E-01 | 4.84E-01 |
| 6 | rs11757182 | 29775525 | C | 0.02 | 5.30  | 2.97E-02 | 2.82E-02 |
| 6 | rs9468632  | 29775939 | T | 0.03 | 4.15  | 3.73E-02 | 4.25E-02 |
| 6 | rs1736971  | 29776322 | A | 0.25 | 0.49  | 4.88E-01 | 4.95E-01 |
| 6 | rs1632971  | 29777911 | A | 0.15 | -1.02 | 2.48E-01 | 2.41E-01 |
| 6 | rs9295820  | 29778501 | G | 0.01 | 1.95  | 5.05E-01 | 5.52E-01 |
| 6 | rs1610699  | 29778987 | C | 0.27 | 0.95  | 1.67E-01 | 1.74E-01 |
| 6 | rs9258468  | 29781328 | A | 0.02 | 0.96  | 6.95E-01 | 7.17E-01 |
| 6 | rs1610707  | 29782048 | T | 0.30 | 0.19  | 7.82E-01 | 7.67E-01 |
| 6 | rs11753629 | 29782331 | A | 0.10 | 1.54  | 1.31E-01 | 1.25E-01 |
| 6 | rs11753654 | 29782621 | T | 0.07 | 0.26  | 8.26E-01 | 7.60E-01 |
| 6 | rs1736956  | 29782690 | T | 0.35 | 0.95  | 1.38E-01 | 1.43E-01 |
| 6 | rs1619379  | 29785235 | A | 0.34 | 1.58  | 1.43E-02 | 1.48E-02 |

|   |            |          |   |      |       |          |          |
|---|------------|----------|---|------|-------|----------|----------|
| 6 | rs2743931  | 29787072 | G | 0.15 | -1.02 | 2.48E-01 | 2.41E-01 |
| 6 | rs1155143  | 29788392 | C | 0.26 | 0.36  | 6.17E-01 | 6.25E-01 |
| 6 | rs1611149  | 29789999 | T | 0.41 | 1.56  | 1.22E-02 | 1.11E-02 |
| 6 | rs1611139  | 29799116 | T | 0.26 | 0.43  | 5.39E-01 | 5.48E-01 |
| 6 | rs11753296 | 29801110 | A | 0.11 | 1.30  | 1.96E-01 | 2.02E-01 |
| 6 | rs16896052 | 29804176 | G | 0.05 | 2.93  | 5.26E-02 | 4.39E-02 |
| 6 | rs2394178  | 29804845 | A | 0.19 | 0.68  | 3.92E-01 | 3.96E-01 |
| 6 | rs2394180  | 29805199 | C | 0.11 | 1.30  | 1.96E-01 | 2.02E-01 |
| 6 | rs9258525  | 29806341 | C | 0.05 | -1.30 | 3.89E-01 | 4.05E-01 |
| 6 | rs2523779  | 29806622 | A | 0.08 | -0.31 | 7.88E-01 | 8.01E-01 |
| 6 | rs2743937  | 29807923 | G | 0.19 | 0.67  | 3.98E-01 | 4.02E-01 |
| 6 | rs2735003  | 29808634 | C | 0.19 | 0.68  | 3.92E-01 | 3.96E-01 |
| 6 | rs9258537  | 29808861 | A | 0.19 | 0.67  | 3.97E-01 | 4.02E-01 |
| 6 | rs2734999  | 29808917 | A | 0.08 | -0.28 | 8.09E-01 | 8.22E-01 |
| 6 | rs2523777  | 29809087 | A | 0.19 | 0.68  | 3.92E-01 | 3.96E-01 |
| 6 | rs2523776  | 29809194 | C | 0.08 | -0.28 | 8.11E-01 | 8.23E-01 |
| 6 | rs1611133  | 29809382 | T | 0.20 | 0.57  | 4.61E-01 | 4.81E-01 |
| 6 | rs2523769  | 29811022 | G | 0.24 | 1.28  | 8.17E-02 | 7.54E-02 |
| 6 | rs16896081 | 29811709 | T | 0.05 | 2.92  | 5.27E-02 | 4.40E-02 |
| 6 | rs2734994  | 29812030 | A | 0.08 | -0.40 | 7.29E-01 | 7.39E-01 |
| 6 | rs5013310  | 29812404 | T | 0.12 | 1.09  | 2.64E-01 | 2.33E-01 |
| 6 | rs2523767  | 29812807 | C | 0.20 | 0.57  | 4.64E-01 | 4.24E-01 |
| 6 | rs2517879  | 29812974 | T | 0.20 | 0.57  | 4.64E-01 | 4.24E-01 |
| 6 | rs9258555  | 29813016 | C | 0.08 | -0.40 | 7.29E-01 | 7.39E-01 |
| 6 | rs3873260  | 29813682 | C | 0.20 | 0.60  | 4.46E-01 | 4.07E-01 |
| 6 | rs9258557  | 29813942 | T | 0.08 | -0.31 | 7.92E-01 | 8.05E-01 |
| 6 | rs2394185  | 29816371 | G | 0.06 | -1.38 | 2.97E-01 | 3.02E-01 |
| 6 | rs2734986  | 29818568 | G | 0.12 | 1.56  | 9.46E-02 | 1.09E-01 |
| 6 | rs2734985  | 29818662 | G | 0.18 | 2.27  | 5.48E-03 | 6.33E-03 |
| 6 | rs2523759  | 29819093 | C | 0.18 | 2.36  | 3.56E-03 | 3.97E-03 |
| 6 | rs2508050  | 29820047 | G | 0.08 | -2.10 | 6.42E-02 | 6.32E-02 |
| 6 | rs5013093  | 29820586 | T | 0.18 | 2.30  | 4.43E-03 | 4.94E-03 |
| 6 | rs2734984  | 29820831 | G | 0.18 | 2.28  | 4.83E-03 | 5.40E-03 |
| 6 | rs2517861  | 29821982 | A | 0.18 | 2.38  | 3.92E-03 | 4.37E-03 |

|   |            |          |   |      |       |          |          |
|---|------------|----------|---|------|-------|----------|----------|
| 6 | rs2975033  | 29822261 | T | 0.39 | -0.27 | 6.64E-01 | 6.85E-01 |
| 6 | rs2517855  | 29823164 | T | 0.13 | 1.62  | 8.16E-02 | 9.37E-02 |
| 6 | rs2517854  | 29823296 | G | 0.36 | 1.12  | 8.59E-02 | 8.74E-02 |
| 6 | rs2844826  | 29823319 | C | 0.36 | 1.12  | 8.59E-02 | 8.74E-02 |
| 6 | rs3132726  | 29823606 | T | 0.22 | -0.52 | 4.95E-01 | 4.91E-01 |
| 6 | rs1611684  | 29825846 | A | 0.36 | 1.12  | 8.59E-02 | 8.74E-02 |
| 6 | rs9258738  | 29827390 | C | 0.23 | 0.41  | 5.77E-01 | 5.46E-01 |
| 6 | rs17185692 | 29828316 | A | 0.06 | 3.05  | 2.67E-02 | 2.33E-02 |
| 6 | rs1611710  | 29828916 | T | 0.36 | 1.12  | 8.59E-02 | 8.74E-02 |
| 6 | rs3094170  | 29829265 | A | 0.15 | -1.02 | 2.49E-01 | 2.43E-01 |
| 6 | rs3094169  | 29829986 | A | 0.19 | -1.20 | 1.35E-01 | 1.36E-01 |
| 6 | rs7760172  | 29830074 | C | 0.03 | 3.43  | 5.40E-02 | 5.76E-02 |
| 6 | rs9258766  | 29830411 | A | 0.23 | 0.37  | 6.13E-01 | 5.82E-01 |
| 6 | rs9258771  | 29830652 | G | 0.23 | 0.37  | 6.13E-01 | 5.82E-01 |
| 6 | rs1611732  | 29831008 | T | 0.36 | 1.09  | 9.45E-02 | 9.63E-02 |
| 6 | rs1611738  | 29831706 | A | 0.13 | 1.62  | 8.16E-02 | 9.37E-02 |
| 6 | rs2524035  | 29832332 | T | 0.18 | -0.03 | 9.70E-01 | 9.57E-01 |
| 6 | rs7760545  | 29833472 | A | 0.01 | 0.92  | 7.87E-01 | 8.86E-01 |
| 6 | rs3094165  | 29833541 | T | 0.29 | -1.20 | 8.13E-02 | 8.42E-02 |
| 6 | rs2734973  | 29833948 | A | 0.11 | -1.49 | 1.36E-01 | 1.30E-01 |
| 6 | rs2517826  | 29834041 | T | 0.18 | 0.46  | 5.64E-01 | 6.01E-01 |
| 6 | rs11967812 | 29835632 | C | 0.05 | -2.73 | 6.04E-02 | 6.24E-02 |
| 6 | rs9258866  | 29836524 | A | 0.05 | -1.19 | 4.29E-01 | 4.48E-01 |
| 6 | rs3132718  | 29836577 | A | 0.31 | 0.49  | 4.65E-01 | 4.40E-01 |
| 6 | rs9258883  | 29837188 | C | 0.23 | 0.55  | 4.54E-01 | 4.44E-01 |
| 6 | rs3094654  | 29839816 | A | 0.31 | 0.49  | 4.65E-01 | 4.40E-01 |
| 6 | rs9258966  | 29840382 | C | 0.31 | 0.49  | 4.65E-01 | 4.40E-01 |
| 6 | rs3132714  | 29840648 | A | 0.31 | 0.49  | 4.65E-01 | 4.40E-01 |
| 6 | rs2523809  | 29849619 | A | 0.11 | -1.50 | 1.34E-01 | 1.27E-01 |
| 6 | rs2734959  | 29849687 | C | 0.43 | -0.19 | 7.67E-01 | 7.87E-01 |
| 6 | rs1611599  | 29853955 | G | 0.04 | -2.60 | 9.72E-02 | 9.19E-02 |
| 6 | rs9259705  | 29881038 | C | 0.05 | -0.50 | 7.50E-01 | 7.77E-01 |
| 6 | rs2524005  | 29899677 | T | 0.15 | 2.16  | 1.08E-02 | 1.30E-02 |
| 6 | rs1062405  | 29913509 | T | 0.05 | -1.32 | 3.69E-01 | 3.81E-01 |

|   |            |          |   |      |       |          |          |
|---|------------|----------|---|------|-------|----------|----------|
| 6 | rs2571382  | 29913727 | T | 0.17 | -0.94 | 2.51E-01 | 2.41E-01 |
| 6 | rs1655900  | 29916618 | A | 0.12 | 1.41  | 1.30E-01 | 1.48E-01 |
| 6 | rs2517715  | 29917439 | G | 0.42 | -0.51 | 4.15E-01 | 4.41E-01 |
| 6 | rs404046   | 29923817 | A | 0.07 | -0.87 | 4.76E-01 | 4.29E-01 |
| 6 | rs12665039 | 29924779 | C | 0.02 | 4.62  | 2.39E-02 | 2.46E-02 |
| 6 | rs429511   | 29924831 | C | 0.13 | 1.55  | 8.57E-02 | 9.43E-02 |
| 6 | rs2523940  | 29925817 | C | 0.06 | -1.32 | 3.04E-01 | 2.80E-01 |
| 6 | rs9260679  | 29926377 | G | 0.03 | 0.79  | 6.70E-01 | 6.80E-01 |
| 6 | rs441808   | 29928137 | A | 0.44 | 0.36  | 5.67E-01 | 5.85E-01 |
| 6 | rs2428521  | 29928649 | A | 0.45 | 0.52  | 4.06E-01 | 4.23E-01 |
| 6 | rs2517689  | 29929253 | G | 0.45 | 0.52  | 4.06E-01 | 4.23E-01 |
| 6 | rs3903160  | 29932897 | T | 0.38 | -0.26 | 6.84E-01 | 7.10E-01 |
| 6 | rs6457109  | 29933261 | C | 0.14 | -1.10 | 2.30E-01 | 2.41E-01 |
| 6 | rs6457110  | 29933881 | A | 0.49 | -0.79 | 2.06E-01 | 2.22E-01 |
| 6 | rs3869062  | 29934891 | G | 0.05 | 2.18  | 1.56E-01 | 1.41E-01 |
| 6 | rs3893464  | 29935250 | T | 0.37 | 1.19  | 6.42E-02 | 6.65E-02 |
| 6 | rs9260759  | 29935372 | T | 0.09 | -1.30 | 2.38E-01 | 2.36E-01 |
| 6 | rs12206499 | 29937127 | G | 0.40 | -0.43 | 4.98E-01 | 5.27E-01 |
| 6 | rs2517673  | 29937242 | T | 0.09 | 0.57  | 5.90E-01 | 6.28E-01 |
| 6 | rs2256539  | 29937740 | C | 0.36 | -0.25 | 6.96E-01 | 6.75E-01 |
| 6 | rs2256543  | 29937833 | T | 0.37 | 0.25  | 7.03E-01 | 7.25E-01 |
| 6 | rs1061535  | 29937924 | A | 0.19 | -0.91 | 2.63E-01 | 2.50E-01 |
| 6 | rs2523971  | 29938258 | T | 0.22 | 0.58  | 4.37E-01 | 4.42E-01 |
| 6 | rs2256919  | 29940750 | C | 0.37 | -0.33 | 6.07E-01 | 5.90E-01 |
| 6 | rs2735078  | 29941400 | C | 0.24 | 0.66  | 3.65E-01 | 3.69E-01 |
| 6 | rs2523946  | 29941943 | G | 0.47 | 0.53  | 4.04E-01 | 4.01E-01 |
| 6 | rs3823355  | 29942083 | T | 0.39 | -0.38 | 5.50E-01 | 5.75E-01 |
| 6 | rs2232236  | 29942191 | T | 0.18 | 0.25  | 7.57E-01 | 7.61E-01 |
| 6 | rs400488   | 29943035 | T | 0.14 | -0.34 | 7.14E-01 | 6.72E-01 |
| 6 | rs6904029  | 29943067 | A | 0.39 | -0.37 | 5.58E-01 | 5.85E-01 |
| 6 | rs2735076  | 29943490 | T | 0.24 | -0.35 | 6.29E-01 | 5.65E-01 |
| 6 | rs2394250  | 29943656 | T | 0.50 | -0.08 | 9.00E-01 | 9.66E-01 |
| 6 | rs2245961  | 29944004 | C | 0.34 | -0.07 | 9.13E-01 | 8.80E-01 |
| 6 | rs3823375  | 29944158 | C | 0.42 | -0.14 | 8.26E-01 | 8.49E-01 |

|   |            |          |   |      |       |          |          |
|---|------------|----------|---|------|-------|----------|----------|
| 6 | rs2571375  | 29945270 | C | 0.08 | -1.02 | 3.71E-01 | 3.77E-01 |
| 6 | rs2246199  | 29945620 | T | 0.09 | -0.39 | 7.16E-01 | 6.57E-01 |
| 6 | rs3132685  | 29945949 | T | 0.09 | 2.35  | 3.29E-02 | 3.21E-02 |
| 6 | rs2108691  | 29948365 | A | 0.12 | -0.81 | 4.03E-01 | 3.84E-01 |
| 6 | rs9260916  | 29948708 | T | 0.04 | -1.12 | 4.65E-01 | 4.84E-01 |
| 6 | rs2394255  | 29949821 | G | 0.42 | -0.05 | 9.39E-01 | 9.33E-01 |
| 6 | rs401618   | 29950210 | C | 0.22 | 0.70  | 3.46E-01 | 3.51E-01 |
| 6 | rs11757750 | 29952162 | C | 0.06 | 1.17  | 3.65E-01 | 4.03E-01 |
| 6 | rs17186937 | 29952814 | C | 0.06 | 1.17  | 3.65E-01 | 4.03E-01 |
| 6 | rs4947244  | 29954364 | G | 0.37 | -0.24 | 7.16E-01 | 7.31E-01 |
| 6 | rs5025708  | 29955199 | G | 0.12 | -0.31 | 7.46E-01 | 7.47E-01 |
| 6 | rs12665186 | 29956842 | G | 0.06 | 1.10  | 3.95E-01 | 4.29E-01 |
| 6 | rs9260930  | 29956953 | C | 0.05 | -0.95 | 5.35E-01 | 5.45E-01 |
| 6 | rs4959039  | 29957069 | G | 0.37 | -0.22 | 7.37E-01 | 7.53E-01 |
| 6 | rs12662611 | 29957077 | T | 0.06 | 1.10  | 3.95E-01 | 4.29E-01 |
| 6 | rs9260967  | 29961367 | A | 0.11 | 0.25  | 8.03E-01 | 8.30E-01 |
| 6 | rs9260984  | 29962268 | A | 0.05 | -0.95 | 5.33E-01 | 5.43E-01 |
| 6 | rs6910898  | 29963179 | C | 0.11 | 0.15  | 8.79E-01 | 8.98E-01 |
| 6 | rs9261035  | 29966175 | A | 0.05 | -0.95 | 5.33E-01 | 5.43E-01 |
| 6 | rs9261040  | 29966620 | G | 0.04 | -0.08 | 9.60E-01 | 9.86E-01 |
| 6 | rs356960   | 29968275 | A | 0.06 | -3.10 | 2.02E-02 | 2.15E-02 |
| 6 | rs9261082  | 29969199 | T | 0.04 | -0.69 | 6.56E-01 | 6.69E-01 |
| 6 | rs7758512  | 29970589 | G | 0.11 | 0.16  | 8.71E-01 | 9.00E-01 |
| 6 | rs9261093  | 29970685 | C | 0.05 | -0.95 | 5.33E-01 | 5.43E-01 |
| 6 | rs11965524 | 29973187 | A | 0.11 | 0.25  | 8.03E-01 | 8.30E-01 |
| 6 | rs9261105  | 29974500 | G | 0.11 | 0.26  | 7.93E-01 | 8.21E-01 |
| 6 | rs6940082  | 29975095 | C | 0.04 | -1.16 | 4.47E-01 | 4.53E-01 |
| 6 | rs9261108  | 29975587 | A | 0.04 | -0.69 | 6.56E-01 | 6.69E-01 |
| 6 | rs9261115  | 29977973 | C | 0.11 | 0.25  | 8.03E-01 | 8.30E-01 |
| 6 | rs9261129  | 29979579 | C | 0.11 | 0.25  | 8.07E-01 | 8.34E-01 |
| 6 | rs9261130  | 29980445 | A | 0.04 | -0.10 | 9.51E-01 | 9.82E-01 |
| 6 | rs16896044 | 29981750 | A | 0.05 | 2.23  | 1.48E-01 | 1.33E-01 |
| 6 | rs356954   | 29983538 | G | 0.22 | 0.57  | 4.43E-01 | 4.49E-01 |
| 6 | rs9357092  | 29984252 | A | 0.37 | -0.05 | 9.33E-01 | 9.55E-01 |

|   |            |          |   |      |       |          |          |
|---|------------|----------|---|------|-------|----------|----------|
| 6 | rs6931776  | 29986427 | G | 0.11 | 0.25  | 8.03E-01 | 8.30E-01 |
| 6 | rs165256   | 29986684 | G | 0.12 | -0.90 | 3.52E-01 | 3.38E-01 |
| 6 | rs9261151  | 29987738 | A | 0.05 | -0.95 | 5.33E-01 | 5.43E-01 |
| 6 | rs3129012  | 29988642 | T | 0.13 | 1.57  | 8.39E-02 | 9.33E-02 |
| 6 | rs3891156  | 29988740 | T | 0.05 | -0.95 | 5.33E-01 | 5.43E-01 |
| 6 | rs9261154  | 29990937 | T | 0.05 | -0.13 | 9.23E-01 | 9.10E-01 |
| 6 | rs1150743  | 29992261 | A | 0.09 | -1.10 | 3.23E-01 | 3.49E-01 |
| 6 | rs6925061  | 29992286 | T | 0.05 | -0.95 | 5.33E-01 | 5.43E-01 |
| 6 | rs166325   | 29993196 | G | 0.06 | -3.10 | 2.02E-02 | 2.15E-02 |
| 6 | rs9261171  | 29996121 | G | 0.05 | -0.95 | 5.33E-01 | 5.43E-01 |
| 6 | rs9261174  | 29996855 | C | 0.10 | -0.12 | 9.05E-01 | 8.98E-01 |
| 6 | rs9261189  | 30000280 | T | 0.11 | 0.27  | 7.89E-01 | 8.15E-01 |
| 6 | rs16896923 | 30000687 | C | 0.04 | 1.94  | 2.09E-01 | 1.95E-01 |
| 6 | rs10947046 | 30000973 | G | 0.06 | 1.10  | 3.95E-01 | 4.29E-01 |
| 6 | rs9261193  | 30002173 | C | 0.05 | -0.95 | 5.33E-01 | 5.43E-01 |
| 6 | rs166327   | 30002881 | G | 0.36 | 0.48  | 4.55E-01 | 4.64E-01 |
| 6 | rs3869067  | 30003797 | C | 0.11 | 0.25  | 8.03E-01 | 8.30E-01 |
| 6 | rs3869068  | 30004052 | A | 0.11 | 0.25  | 8.03E-01 | 8.30E-01 |
| 6 | rs9261203  | 30005043 | G | 0.05 | -0.95 | 5.33E-01 | 5.43E-01 |
| 6 | rs4711207  | 30005754 | A | 0.38 | -0.18 | 7.87E-01 | 8.26E-01 |
| 6 | rs9261207  | 30006482 | C | 0.05 | -0.95 | 5.33E-01 | 5.43E-01 |
| 6 | rs259937   | 30007493 | G | 0.06 | -3.10 | 2.02E-02 | 2.15E-02 |
| 6 | rs9261212  | 30008996 | C | 0.13 | -0.64 | 4.91E-01 | 4.72E-01 |
| 6 | rs9261216  | 30010139 | G | 0.11 | 0.25  | 8.03E-01 | 8.30E-01 |
| 6 | rs259940   | 30011934 | C | 0.22 | 0.53  | 4.81E-01 | 4.88E-01 |
| 6 | rs9261224  | 30013887 | T | 0.09 | -0.66 | 5.48E-01 | 5.22E-01 |
| 6 | rs259942   | 30015167 | A | 0.13 | -1.26 | 1.67E-01 | 1.64E-01 |
| 6 | rs3132128  | 30016190 | C | 0.13 | -0.65 | 4.79E-01 | 4.61E-01 |
| 6 | rs7771476  | 30016573 | G | 0.05 | -0.95 | 5.33E-01 | 5.43E-01 |
| 6 | rs28570682 | 30021740 | C | 0.04 | -0.33 | 8.32E-01 | 7.80E-01 |
| 6 | rs9261256  | 30021941 | G | 0.09 | -0.66 | 5.48E-01 | 5.22E-01 |
| 6 | rs7761314  | 30022153 | T | 0.09 | -0.66 | 5.48E-01 | 5.22E-01 |
| 6 | rs9261258  | 30022808 | A | 0.09 | -0.66 | 5.48E-01 | 5.22E-01 |
| 6 | rs3869070  | 30023868 | T | 0.49 | -0.23 | 7.18E-01 | 6.75E-01 |

|   |            |          |   |      |       |          |          |
|---|------------|----------|---|------|-------|----------|----------|
| 6 | rs9366752  | 30024677 | T | 0.31 | -0.17 | 8.05E-01 | 8.75E-01 |
| 6 | rs9261263  | 30024749 | G | 0.05 | -0.95 | 5.33E-01 | 5.43E-01 |
| 6 | rs259919   | 30025503 | T | 0.28 | 0.50  | 4.66E-01 | 5.09E-01 |
| 6 | rs3757333  | 30028606 | A | 0.04 | -0.33 | 8.32E-01 | 7.80E-01 |
| 6 | rs1150740  | 30030689 | T | 0.08 | -1.34 | 2.50E-01 | 2.58E-01 |
| 6 | rs9261277  | 30031091 | C | 0.09 | -0.66 | 5.48E-01 | 5.22E-01 |
| 6 | rs1150739  | 30031345 | G | 0.35 | 0.14  | 8.28E-01 | 8.42E-01 |
| 6 | rs8321     | 30032522 | G | 0.08 | 2.73  | 1.68E-02 | 1.66E-02 |
| 6 | rs3807031  | 30033884 | A | 0.27 | 0.51  | 4.73E-01 | 4.75E-01 |
| 6 | rs9261281  | 30035341 | A | 0.08 | -0.38 | 7.46E-01 | 7.26E-01 |
| 6 | rs9261285  | 30036083 | A | 0.05 | -0.95 | 5.33E-01 | 5.43E-01 |
| 6 | rs17187693 | 30036333 | C | 0.05 | 2.23  | 1.48E-01 | 1.32E-01 |
| 6 | rs17187707 | 30036528 | G | 0.06 | -0.77 | 5.73E-01 | 5.90E-01 |
| 6 | rs9261288  | 30037353 | T | 0.04 | -0.40 | 8.12E-01 | 8.39E-01 |
| 6 | rs1245371  | 30038352 | C | 0.22 | 0.39  | 5.96E-01 | 6.14E-01 |
| 6 | rs9261290  | 30038647 | C | 0.08 | 2.56  | 2.50E-02 | 2.50E-02 |
| 6 | rs2301753  | 30039240 | A | 0.10 | 0.43  | 6.73E-01 | 6.99E-01 |
| 6 | rs2074480  | 30040810 | C | 0.11 | 0.25  | 8.03E-01 | 8.30E-01 |
| 6 | rs2074479  | 30041009 | C | 0.11 | 0.25  | 8.03E-01 | 8.30E-01 |
| 6 | rs9261301  | 30041559 | A | 0.48 | -0.40 | 5.17E-01 | 5.22E-01 |
| 6 | rs3807034  | 30043992 | C | 0.13 | 0.45  | 6.21E-01 | 6.55E-01 |
| 6 | rs3807035  | 30044827 | T | 0.13 | 0.51  | 5.78E-01 | 6.14E-01 |
| 6 | rs1150735  | 30045199 | T | 0.30 | 0.68  | 3.19E-01 | 3.01E-01 |
| 6 | rs2394734  | 30046246 | A | 0.16 | -0.06 | 9.42E-01 | 9.28E-01 |
| 6 | rs1150733  | 30046427 | T | 0.03 | -2.75 | 1.19E-01 | 1.12E-01 |
| 6 | rs4711209  | 30047403 | A | 0.37 | -0.05 | 9.33E-01 | 9.54E-01 |
| 6 | rs9261316  | 30047837 | A | 0.05 | -0.95 | 5.33E-01 | 5.43E-01 |
| 6 | rs9261317  | 30048305 | T | 0.05 | -0.95 | 5.33E-01 | 5.43E-01 |
| 6 | rs6909253  | 30055643 | T | 0.49 | 0.17  | 7.82E-01 | 7.74E-01 |
| 6 | rs9261361  | 30055933 | G | 0.05 | -0.95 | 5.33E-01 | 5.43E-01 |
| 6 | rs1264708  | 30057154 | C | 0.19 | -1.11 | 1.63E-01 | 1.86E-01 |
| 6 | rs9261371  | 30058988 | T | 0.13 | 0.38  | 6.77E-01 | 6.99E-01 |
| 6 | rs9261375  | 30059451 | G | 0.05 | -0.77 | 6.12E-01 | 6.20E-01 |
| 6 | rs7753935  | 30060783 | A | 0.13 | 0.56  | 5.45E-01 | 6.21E-01 |

|   |            |          |   |      |       |          |          |
|---|------------|----------|---|------|-------|----------|----------|
| 6 | rs17187805 | 30061202 | A | 0.13 | 0.54  | 5.57E-01 | 6.33E-01 |
| 6 | rs9261387  | 30061361 | T | 0.09 | -0.41 | 7.08E-01 | 7.35E-01 |
| 6 | rs6923832  | 30062058 | A | 0.05 | -0.95 | 5.33E-01 | 5.43E-01 |
| 6 | rs7765810  | 30063496 | A | 0.16 | 0.14  | 8.70E-01 | 9.44E-01 |
| 6 | rs1264706  | 30063652 | G | 0.08 | 2.85  | 1.21E-02 | 1.16E-02 |
| 6 | rs9261394  | 30064562 | G | 0.49 | 0.30  | 6.29E-01 | 6.06E-01 |
| 6 | rs1264704  | 30065319 | T | 0.24 | -0.91 | 2.21E-01 | 2.64E-01 |
| 6 | rs1264702  | 30065575 | G | 0.19 | 1.44  | 6.07E-02 | 7.08E-02 |
| 6 | rs916570   | 30066031 | C | 0.22 | 1.63  | 2.82E-02 | 3.52E-02 |
| 6 | rs1264701  | 30066358 | A | 0.17 | -0.78 | 3.53E-01 | 3.89E-01 |
| 6 | rs1264695  | 30067892 | C | 0.20 | 1.61  | 3.27E-02 | 3.91E-02 |
| 6 | rs9261403  | 30069525 | T | 0.04 | -0.48 | 7.76E-01 | 8.25E-01 |
| 6 | rs1116221  | 30071330 | A | 0.22 | 0.76  | 3.05E-01 | 3.26E-01 |
| 6 | rs11964542 | 30071760 | C | 0.04 | -1.53 | 3.74E-01 | 3.66E-01 |
| 6 | rs2844796  | 30072511 | T | 0.20 | 1.16  | 1.30E-01 | 1.45E-01 |
| 6 | rs3132680  | 30073195 | T | 0.39 | 0.09  | 8.81E-01 | 8.88E-01 |
| 6 | rs2844795  | 30073847 | G | 0.50 | 0.71  | 2.54E-01 | 2.58E-01 |
| 6 | rs3132679  | 30075843 | A | 0.16 | -0.59 | 4.87E-01 | 4.77E-01 |
| 6 | rs2023472  | 30075864 | T | 0.40 | 0.46  | 4.74E-01 | 4.38E-01 |
| 6 | rs2074483  | 30076755 | T | 0.36 | -0.11 | 8.65E-01 | 8.78E-01 |
| 6 | rs9378220  | 30077135 | A | 0.12 | 0.49  | 6.08E-01 | 5.95E-01 |
| 6 | rs2523990  | 30077229 | T | 0.43 | -0.64 | 3.27E-01 | 2.86E-01 |
| 6 | rs4959041  | 30077967 | C | 0.38 | -0.04 | 9.46E-01 | 9.58E-01 |
| 6 | rs2523989  | 30078275 | A | 0.11 | 1.68  | 8.08E-02 | 7.71E-02 |
| 6 | rs2523987  | 30079993 | G | 0.10 | 2.00  | 4.36E-02 | 4.46E-02 |
| 6 | rs3734838  | 30080231 | A | 0.07 | -1.43 | 2.58E-01 | 2.83E-01 |
| 6 | rs2517598  | 30080274 | T | 0.12 | 1.77  | 6.33E-02 | 6.14E-02 |
| 6 | rs2523984  | 30082003 | A | 0.12 | 1.77  | 6.29E-02 | 6.10E-02 |
| 6 | rs2245420  | 30082688 | C | 0.12 | 1.82  | 5.59E-02 | 5.41E-02 |
| 6 | rs2523981  | 30083182 | A | 0.11 | 1.98  | 4.56E-02 | 4.61E-02 |
| 6 | rs2523979  | 30083515 | T | 0.11 | 1.87  | 5.66E-02 | 5.72E-02 |
| 6 | rs9261434  | 30087776 | G | 0.13 | -0.73 | 4.34E-01 | 4.49E-01 |
| 6 | rs9261441  | 30091758 | A | 0.09 | -0.63 | 5.72E-01 | 6.12E-01 |
| 6 | rs17455565 | 30092308 | A | 0.01 | -0.89 | 7.66E-01 | 8.20E-01 |



|   |            |          |   |      |       |          |          |
|---|------------|----------|---|------|-------|----------|----------|
| 6 | rs1419675  | 30092707 | C | 0.25 | -1.14 | 1.21E-01 | 9.70E-02 |
| 6 | rs1419674  | 30092935 | A | 0.03 | -2.89 | 9.94E-02 | 9.05E-02 |
| 6 | rs2517592  | 30093137 | A | 0.19 | 0.54  | 4.97E-01 | 4.78E-01 |
| 6 | rs10947055 | 30093364 | C | 0.09 | -0.73 | 5.01E-01 | 5.54E-01 |
| 6 | rs9261442  | 30093744 | G | 0.29 | 0.74  | 2.81E-01 | 2.80E-01 |
| 6 | rs9261444  | 30094611 | T | 0.29 | 0.59  | 3.99E-01 | 4.05E-01 |
| 6 | rs9261447  | 30095202 | C | 0.30 | 0.71  | 3.01E-01 | 2.93E-01 |
| 6 | rs9261448  | 30095329 | C | 0.29 | 0.79  | 2.50E-01 | 2.49E-01 |
| 6 | rs10947056 | 30095603 | G | 0.09 | -0.82 | 4.55E-01 | 5.05E-01 |
| 6 | rs9261450  | 30097818 | G | 0.30 | 0.64  | 3.53E-01 | 3.42E-01 |
| 6 | rs757263   | 30098323 | A | 0.30 | 0.68  | 3.21E-01 | 3.10E-01 |
| 6 | rs9261453  | 30099948 | G | 0.30 | 0.63  | 3.60E-01 | 3.54E-01 |
| 6 | rs9261455  | 30099996 | G | 0.30 | 0.63  | 3.60E-01 | 3.54E-01 |
| 6 | rs1362104  | 30101656 | T | 0.31 | 0.53  | 4.36E-01 | 4.14E-01 |
| 6 | rs1541268  | 30103394 | C | 0.29 | 0.80  | 2.49E-01 | 2.56E-01 |
| 6 | rs2021723  | 30103923 | T | 0.13 | -1.19 | 2.05E-01 | 1.52E-01 |
| 6 | rs9261468  | 30104480 | G | 0.29 | 0.65  | 3.50E-01 | 3.57E-01 |
| 6 | rs2107202  | 30105743 | A | 0.25 | -1.20 | 1.01E-01 | 8.10E-02 |
| 6 | rs2857440  | 30106493 | C | 0.29 | 0.82  | 2.35E-01 | 2.43E-01 |
| 6 | rs9261487  | 30109207 | A | 0.02 | 0.82  | 7.53E-01 | 6.81E-01 |
| 6 | rs9261488  | 30109412 | T | 0.29 | 0.76  | 2.72E-01 | 2.74E-01 |
| 6 | rs9261492  | 30110058 | A | 0.31 | 0.65  | 3.43E-01 | 3.45E-01 |
| 6 | rs9261505  | 30112408 | G | 0.29 | 0.76  | 2.71E-01 | 2.76E-01 |
| 6 | rs9261511  | 30113245 | A | 0.29 | 0.62  | 3.70E-01 | 3.77E-01 |
| 6 | rs3815081  | 30114074 | C | 0.13 | 0.35  | 7.14E-01 | 6.94E-01 |
| 6 | rs757262   | 30114955 | A | 0.29 | 0.78  | 2.61E-01 | 2.65E-01 |
| 6 | rs757260   | 30115204 | A | 0.13 | 0.17  | 8.60E-01 | 9.38E-01 |
| 6 | rs757259   | 30115542 | T | 0.29 | 0.79  | 2.53E-01 | 2.58E-01 |
| 6 | rs3132676  | 30116078 | T | 0.16 | -0.63 | 4.57E-01 | 4.93E-01 |
| 6 | rs9261519  | 30117101 | C | 0.31 | 0.66  | 3.36E-01 | 3.39E-01 |
| 6 | rs1557611  | 30118360 | A | 0.29 | 0.82  | 2.39E-01 | 2.42E-01 |
| 6 | rs1557608  | 30118582 | C | 0.35 | 0.67  | 3.12E-01 | 3.08E-01 |
| 6 | rs1557607  | 30118637 | C | 0.29 | 0.79  | 2.56E-01 | 2.58E-01 |
| 6 | rs9468692  | 30119890 | T | 0.09 | 0.08  | 9.39E-01 | 8.97E-01 |

|   |            |          |   |      |       |          |          |
|---|------------|----------|---|------|-------|----------|----------|
| 6 | rs2257914  | 30120563 | T | 0.13 | -1.38 | 1.40E-01 | 1.06E-01 |
| 6 | rs2022065  | 30121460 | A | 0.35 | 0.28  | 6.76E-01 | 6.85E-01 |
| 6 | rs3734840  | 30121605 | C | 0.16 | -0.28 | 7.49E-01 | 7.72E-01 |
| 6 | rs2517646  | 30122575 | G | 0.35 | -1.27 | 5.66E-02 | 5.83E-02 |
| 6 | rs9261535  | 30127323 | A | 0.29 | 0.69  | 3.19E-01 | 3.27E-01 |
| 6 | rs12212092 | 30128442 | T | 0.09 | 0.11  | 9.19E-01 | 8.84E-01 |
| 6 | rs9261536  | 30131349 | T | 0.12 | -1.13 | 2.32E-01 | 2.41E-01 |
| 6 | rs17188127 | 30135102 | T | 0.02 | -0.10 | 9.65E-01 | 9.94E-01 |
| 6 | rs9368624  | 30135977 | A | 0.15 | -0.03 | 9.78E-01 | 9.87E-01 |
| 6 | rs929157   | 30137209 | T | 0.12 | 1.55  | 1.06E-01 | 1.04E-01 |
| 6 | rs2074475  | 30137890 | G | 0.01 | -3.86 | 1.96E-01 | 2.12E-01 |
| 6 | rs1029238  | 30138645 | T | 0.09 | -0.58 | 6.03E-01 | 5.91E-01 |
| 6 | rs929156   | 30139699 | T | 0.31 | 0.49  | 4.69E-01 | 4.77E-01 |
| 6 | rs6905949  | 30140525 | C | 0.14 | -0.46 | 6.08E-01 | 5.55E-01 |
| 6 | rs13212414 | 30140540 | T | 0.08 | -0.34 | 7.75E-01 | 8.34E-01 |
| 6 | rs2844787  | 30140913 | C | 0.22 | -1.67 | 2.63E-02 | 2.93E-02 |
| 6 | rs9380156  | 30141042 | G | 0.13 | 0.14  | 8.81E-01 | 8.61E-01 |
| 6 | rs957765   | 30142690 | A | 0.29 | 0.70  | 3.14E-01 | 3.20E-01 |
| 6 | rs9261538  | 30143491 | C | 0.09 | -0.65 | 5.38E-01 | 5.86E-01 |
| 6 | rs2844786  | 30144420 | T | 0.37 | 0.08  | 9.05E-01 | 9.39E-01 |
| 6 | rs9261539  | 30145083 | G | 0.50 | -0.66 | 2.91E-01 | 3.00E-01 |
| 6 | rs9261543  | 30146650 | A | 0.50 | -0.74 | 2.39E-01 | 2.44E-01 |
| 6 | rs28743267 | 30147689 | G | 0.13 | 0.11  | 9.03E-01 | 9.82E-01 |
| 6 | rs2844782  | 30150043 | A | 0.37 | 0.06  | 9.22E-01 | 9.59E-01 |
| 6 | rs2428504  | 30151370 | G | 0.07 | -1.59 | 1.93E-01 | 1.84E-01 |
| 6 | rs9366754  | 30152033 | C | 0.13 | 0.11  | 9.11E-01 | 8.92E-01 |
| 6 | rs9261547  | 30154928 | G | 0.12 | -1.15 | 2.23E-01 | 2.32E-01 |
| 6 | rs6457164  | 30155108 | C | 0.50 | -0.64 | 3.11E-01 | 3.23E-01 |
| 6 | rs6457167  | 30155313 | C | 0.50 | -0.65 | 2.99E-01 | 3.07E-01 |
| 6 | rs2074471  | 30156802 | T | 0.01 | -3.91 | 1.52E-01 | 1.65E-01 |
| 6 | rs765977   | 30157654 | G | 0.50 | -0.65 | 3.02E-01 | 3.12E-01 |
| 6 | rs718254   | 30159039 | G | 0.50 | -0.63 | 3.14E-01 | 3.25E-01 |
| 6 | rs2284165  | 30160055 | G | 0.22 | -1.02 | 1.76E-01 | 1.99E-01 |
| 6 | rs4711211  | 30162809 | G | 0.29 | 0.70  | 3.14E-01 | 3.20E-01 |

|   |            |          |   |      |       |          |          |
|---|------------|----------|---|------|-------|----------|----------|
| 6 | rs2517614  | 30163955 | T | 0.19 | 0.39  | 6.22E-01 | 6.27E-01 |
| 6 | rs3778622  | 30165316 | A | 0.29 | 0.74  | 2.88E-01 | 2.93E-01 |
| 6 | rs28360011 | 30166945 | G | 0.03 | -2.61 | 1.24E-01 | 1.10E-01 |
| 6 | rs28360013 | 30168202 | C | 0.07 | -1.59 | 1.93E-01 | 1.84E-01 |
| 6 | rs2517612  | 30169092 | C | 0.12 | 1.55  | 1.06E-01 | 1.04E-01 |
| 6 | rs2517611  | 30169327 | C | 0.19 | 0.39  | 6.22E-01 | 6.27E-01 |
| 6 | rs28730510 | 30170057 | G | 0.14 | 0.03  | 9.72E-01 | 9.43E-01 |
| 6 | rs2844776  | 30171827 | G | 0.20 | 0.41  | 6.03E-01 | 6.11E-01 |
| 6 | rs971570   | 30172513 | G | 0.20 | 0.42  | 5.95E-01 | 6.06E-01 |
| 6 | rs885913   | 30174428 | A | 0.12 | 1.60  | 9.51E-02 | 9.39E-02 |
| 6 | rs9261564  | 30174590 | T | 0.06 | -1.68 | 2.01E-01 | 2.20E-01 |
| 6 | rs10947058 | 30176122 | T | 0.07 | 0.07  | 9.56E-01 | 9.00E-01 |
| 6 | rs3132671  | 30178287 | A | 0.50 | 0.69  | 2.70E-01 | 2.83E-01 |
| 6 | rs3130383  | 30179026 | A | 0.50 | -0.69 | 2.69E-01 | 2.82E-01 |
| 6 | rs11967808 | 30179188 | C | 0.02 | 0.13  | 9.53E-01 | 9.12E-01 |
| 6 | rs2844775  | 30179422 | T | 0.31 | 0.50  | 4.61E-01 | 4.72E-01 |
| 6 | rs2188100  | 30181883 | T | 0.12 | 1.55  | 1.06E-01 | 1.04E-01 |
| 6 | rs1345229  | 30182395 | T | 0.08 | -0.40 | 7.25E-01 | 7.30E-01 |
| 6 | rs9261567  | 30185244 | C | 0.12 | -0.78 | 4.12E-01 | 3.83E-01 |
| 6 | rs2106070  | 30186863 | C | 0.49 | 0.78  | 2.17E-01 | 2.25E-01 |
| 6 | rs3094132  | 30187434 | G | 0.50 | 0.63  | 3.16E-01 | 3.34E-01 |
| 6 | rs3130391  | 30190640 | T | 0.50 | 0.63  | 3.16E-01 | 3.34E-01 |
| 6 | rs9261578  | 30192467 | G | 0.15 | -0.07 | 9.40E-01 | 8.90E-01 |
| 6 | rs2040486  | 30194103 | G | 0.50 | 0.63  | 3.16E-01 | 3.34E-01 |
| 6 | rs3129690  | 30196855 | C | 0.50 | 0.60  | 3.36E-01 | 3.57E-01 |
| 6 | rs3094138  | 30199016 | G | 0.14 | -1.34 | 1.38E-01 | 1.47E-01 |
| 6 | rs1573295  | 30199067 | T | 0.50 | 0.63  | 3.16E-01 | 3.34E-01 |
| 6 | rs17188268 | 30199358 | A | 0.02 | -0.13 | 9.52E-01 | 9.85E-01 |
| 6 | rs3132674  | 30202429 | A | 0.50 | 0.61  | 3.32E-01 | 3.47E-01 |
| 6 | rs885916   | 30202571 | A | 0.12 | 1.65  | 8.47E-02 | 8.36E-02 |
| 6 | rs885914   | 30202767 | G | 0.38 | -0.10 | 8.76E-01 | 8.45E-01 |
| 6 | rs2844780  | 30204526 | A | 0.38 | -0.08 | 9.06E-01 | 8.69E-01 |
| 6 | rs2844779  | 30205407 | A | 0.37 | -0.31 | 6.30E-01 | 5.92E-01 |
| 6 | rs10456378 | 30206186 | A | 0.07 | -0.15 | 9.02E-01 | 9.58E-01 |

|   |            |          |   |      |       |          |          |
|---|------------|----------|---|------|-------|----------|----------|
| 6 | rs2844773  | 30207495 | T | 0.13 | 1.45  | 1.15E-01 | 1.10E-01 |
| 6 | rs2285801  | 30209493 | T | 0.49 | -0.38 | 5.47E-01 | 5.60E-01 |
| 6 | rs1362089  | 30209802 | A | 0.49 | -0.38 | 5.47E-01 | 5.60E-01 |
| 6 | rs1362088  | 30209836 | G | 0.01 | -3.70 | 2.01E-01 | 2.20E-01 |
| 6 | rs9261588  | 30210807 | T | 0.12 | -1.07 | 2.55E-01 | 2.67E-01 |
| 6 | rs12176323 | 30212504 | T | 0.01 | -3.70 | 2.01E-01 | 2.20E-01 |
| 6 | rs3132662  | 30215592 | T | 0.49 | 0.43  | 4.95E-01 | 5.22E-01 |
| 6 | rs2516723  | 30221442 | G | 0.49 | 0.42  | 4.97E-01 | 5.29E-01 |
| 6 | rs1579219  | 30224305 | A | 0.13 | -1.19 | 2.02E-01 | 2.10E-01 |
| 6 | rs3094078  | 30224970 | T | 0.08 | 2.27  | 4.21E-02 | 4.13E-02 |
| 6 | rs962899   | 30226811 | C | 0.18 | -1.45 | 8.60E-02 | 7.27E-02 |
| 6 | rs2844766  | 30230661 | G | 0.33 | -0.31 | 6.46E-01 | 6.44E-01 |
| 6 | rs3094073  | 30231224 | T | 0.13 | 1.18  | 2.01E-01 | 1.89E-01 |
| 6 | rs3129831  | 30234627 | T | 0.13 | 1.18  | 2.01E-01 | 1.89E-01 |
| 6 | rs9378145  | 30236331 | C | 0.13 | -1.22 | 1.93E-01 | 1.99E-01 |
| 6 | rs2844761  | 30237454 | C | 0.19 | -1.36 | 8.99E-02 | 8.30E-02 |
| 6 | rs2097773  | 30240926 | T | 0.19 | -1.36 | 8.99E-02 | 8.30E-02 |
| 6 | rs9393999  | 30241114 | G | 0.13 | -1.17 | 2.11E-01 | 2.18E-01 |
| 6 | rs28780093 | 30242171 | G | 0.10 | -0.03 | 9.76E-01 | 8.96E-01 |
| 6 | rs968909   | 30244579 | A | 0.24 | -1.27 | 8.71E-02 | 8.43E-02 |
| 6 | rs2844754  | 30246212 | T | 0.05 | -2.40 | 9.92E-02 | 8.74E-02 |
| 6 | rs2844753  | 30248424 | G | 0.09 | -0.37 | 7.40E-01 | 8.26E-01 |
| 6 | rs2394779  | 30252606 | C | 0.13 | -1.17 | 2.11E-01 | 2.18E-01 |
| 6 | rs1132547  | 30253339 | C | 0.06 | -1.43 | 2.81E-01 | 2.44E-01 |
| 6 | rs10484551 | 30256838 | A | 0.05 | -0.65 | 6.60E-01 | 7.03E-01 |
| 6 | rs17194767 | 30256885 | T | 0.05 | -0.65 | 6.60E-01 | 7.03E-01 |
| 6 | rs1264622  | 30256936 | A | 0.17 | 1.00  | 2.31E-01 | 2.04E-01 |
| 6 | rs2285799  | 30257693 | G | 0.05 | -0.65 | 6.60E-01 | 7.03E-01 |
| 6 | rs4713309  | 30258708 | T | 0.05 | -0.65 | 6.60E-01 | 7.03E-01 |
| 6 | rs1045251  | 30259657 | A | 0.19 | -1.36 | 8.99E-02 | 8.30E-02 |
| 6 | rs11752362 | 30260982 | T | 0.11 | 0.53  | 6.00E-01 | 6.65E-01 |
| 6 | rs1048664  | 30262512 | C | 0.05 | -2.40 | 9.92E-02 | 8.74E-02 |
| 6 | rs1264616  | 30264307 | A | 0.19 | -1.36 | 8.99E-02 | 8.30E-02 |
| 6 | rs261950   | 30269561 | A | 0.25 | -1.40 | 5.65E-02 | 5.14E-02 |

|   |            |          |   |      |       |          |          |
|---|------------|----------|---|------|-------|----------|----------|
| 6 | rs261949   | 30270080 | T | 0.19 | -1.29 | 1.07E-01 | 9.74E-02 |
| 6 | rs261946   | 30271334 | C | 0.31 | 0.76  | 2.63E-01 | 2.59E-01 |
| 6 | rs4713310  | 30271792 | A | 0.05 | -1.14 | 4.09E-01 | 4.17E-01 |
| 6 | rs9380167  | 30274461 | G | 0.25 | -1.46 | 4.72E-02 | 4.38E-02 |
| 6 | rs928822   | 30275246 | C | 0.47 | 0.27  | 6.67E-01 | 6.51E-01 |
| 6 | rs1264608  | 30278112 | A | 0.09 | -0.25 | 8.22E-01 | 9.03E-01 |
| 6 | rs3130380  | 30279130 | A | 0.08 | 2.32  | 3.72E-02 | 3.67E-02 |
| 6 | rs3094065  | 30282332 | A | 0.12 | -1.06 | 2.59E-01 | 2.68E-01 |
| 6 | rs6912771  | 30284375 | A | 0.25 | -1.46 | 4.72E-02 | 4.41E-02 |
| 6 | rs9357097  | 30285121 | T | 0.23 | -1.11 | 1.34E-01 | 1.24E-01 |
| 6 | rs6924282  | 30285883 | A | 0.25 | -1.57 | 3.16E-02 | 2.87E-02 |
| 6 | rs9366755  | 30286729 | T | 0.13 | -1.10 | 2.40E-01 | 2.49E-01 |
| 6 | rs6900042  | 30289271 | T | 0.25 | -1.57 | 3.16E-02 | 2.87E-02 |
| 6 | rs12174823 | 30292083 | C | 0.12 | -0.71 | 4.71E-01 | 4.69E-01 |
| 6 | rs28360024 | 30292147 | T | 0.06 | -1.39 | 2.97E-01 | 2.60E-01 |
| 6 | rs17194824 | 30293186 | A | 0.05 | -2.40 | 9.92E-02 | 8.74E-02 |
| 6 | rs1264583  | 30293483 | A | 0.09 | -0.25 | 8.22E-01 | 9.03E-01 |
| 6 | rs3094064  | 30296253 | T | 0.09 | 1.95  | 7.44E-02 | 7.49E-02 |
| 6 | rs1264581  | 30297505 | A | 0.09 | -0.09 | 9.34E-01 | 9.86E-01 |
| 6 | rs3094067  | 30299245 | C | 0.08 | 2.18  | 5.02E-02 | 4.92E-02 |
| 6 | rs12663184 | 30301600 | T | 0.10 | 0.04  | 9.71E-01 | 9.51E-01 |
| 6 | rs3778624  | 30302600 | G | 0.20 | -1.29 | 9.99E-02 | 8.71E-02 |
| 6 | rs7767653  | 30304816 | A | 0.06 | -1.28 | 3.37E-01 | 2.96E-01 |
| 6 | rs3129840  | 30307342 | C | 0.13 | 1.01  | 2.76E-01 | 2.60E-01 |
| 6 | rs9380173  | 30309105 | A | 0.12 | -0.73 | 4.53E-01 | 4.50E-01 |
| 6 | rs2240058  | 30310500 | G | 0.12 | -0.73 | 4.53E-01 | 4.50E-01 |
| 6 | rs6931763  | 30311932 | C | 0.11 | 0.65  | 5.17E-01 | 5.87E-01 |
| 6 | rs974962   | 30314607 | C | 0.12 | -0.72 | 4.58E-01 | 4.57E-01 |
| 6 | rs974961   | 30315011 | T | 0.31 | 0.77  | 2.59E-01 | 2.56E-01 |
| 6 | rs9394003  | 30315210 | G | 0.20 | -1.43 | 6.87E-02 | 5.98E-02 |
| 6 | rs9380174  | 30316739 | T | 0.19 | -1.26 | 1.17E-01 | 1.09E-01 |
| 6 | rs34266569 | 30316980 | C | 0.05 | 2.74  | 6.30E-02 | 6.14E-02 |
| 6 | rs3130364  | 30319154 | T | 0.08 | 2.73  | 1.38E-02 | 1.30E-02 |
| 6 | rs3132649  | 30321057 | T | 0.10 | 1.91  | 5.69E-02 | 5.17E-02 |

|   |            |          |   |      |       |          |          |
|---|------------|----------|---|------|-------|----------|----------|
| 6 | rs3094061  | 30321189 | G | 0.10 | 1.91  | 5.69E-02 | 5.17E-02 |
| 6 | rs984802   | 30321361 | A | 0.24 | -0.96 | 1.92E-01 | 1.65E-01 |
| 6 | rs3130377  | 30323393 | T | 0.08 | 2.30  | 4.03E-02 | 3.74E-02 |
| 6 | rs3094626  | 30323623 | G | 0.37 | 0.32  | 6.28E-01 | 6.88E-01 |
| 6 | rs3130379  | 30325531 | T | 0.21 | -0.99 | 1.94E-01 | 1.76E-01 |
| 6 | rs3130350  | 30327839 | T | 0.08 | 2.20  | 5.01E-02 | 4.64E-02 |
| 6 | rs3130351  | 30328192 | T | 0.08 | 2.28  | 4.24E-02 | 3.96E-02 |
| 6 | rs3094621  | 30328753 | G | 0.09 | 2.40  | 2.97E-02 | 2.71E-02 |
| 6 | rs3132647  | 30330737 | C | 0.08 | 2.30  | 4.03E-02 | 3.74E-02 |
| 6 | rs1012411  | 30332555 | C | 0.28 | 0.45  | 5.17E-01 | 4.90E-01 |
| 6 | rs3094054  | 30333505 | A | 0.09 | 1.96  | 7.28E-02 | 7.19E-02 |
| 6 | rs2040450  | 30334339 | A | 0.14 | -0.09 | 9.24E-01 | 9.65E-01 |
| 6 | rs2057726  | 30335350 | G | 0.13 | -0.89 | 3.36E-01 | 3.49E-01 |
| 6 | rs2022079  | 30337738 | A | 0.28 | -0.68 | 3.35E-01 | 2.98E-01 |
| 6 | rs17839997 | 30339293 | C | 0.05 | -1.96 | 1.88E-01 | 1.67E-01 |
| 6 | rs3130361  | 30339564 | A | 0.21 | -0.80 | 2.93E-01 | 2.70E-01 |
| 6 | rs2844746  | 30339602 | A | 0.36 | -0.59 | 3.74E-01 | 4.02E-01 |
| 6 | rs2844745  | 30343703 | G | 0.43 | -0.04 | 9.51E-01 | 9.64E-01 |
| 6 | rs3132631  | 30344645 | A | 0.09 | 2.36  | 3.00E-02 | 3.31E-02 |
| 6 | rs3094062  | 30344690 | T | 0.43 | 0.02  | 9.70E-01 | 9.43E-01 |
| 6 | rs3132630  | 30345118 | A | 0.09 | 2.36  | 3.00E-02 | 3.31E-02 |
| 6 | rs1419653  | 30345139 | A | 0.43 | 0.02  | 9.70E-01 | 9.43E-01 |
| 6 | rs3129822  | 30346208 | T | 0.09 | 2.36  | 3.00E-02 | 3.31E-02 |
| 6 | rs9404964  | 30347833 | C | 0.28 | -0.56 | 4.26E-01 | 3.88E-01 |
| 6 | rs3132622  | 30348674 | A | 0.43 | 0.07  | 9.12E-01 | 9.96E-01 |
| 6 | rs3094623  | 30349201 | T | 0.43 | 0.07  | 9.12E-01 | 9.96E-01 |
| 6 | rs2524211  | 30350660 | T | 0.14 | 0.00  | 9.97E-01 | 8.98E-01 |
| 6 | rs28780099 | 30351417 | G | 0.06 | 0.04  | 9.77E-01 | 9.39E-01 |
| 6 | rs3130126  | 30353739 | A | 0.09 | 2.36  | 3.00E-02 | 3.31E-02 |
| 6 | rs3094028  | 30354642 | T | 0.43 | 0.07  | 9.11E-01 | 9.96E-01 |
| 6 | rs3130140  | 30357780 | C | 0.41 | -0.09 | 8.91E-01 | 8.02E-01 |
| 6 | rs3094051  | 30358151 | C | 0.43 | 0.08  | 9.06E-01 | 9.93E-01 |
| 6 | rs3130143  | 30358216 | C | 0.43 | 0.08  | 9.06E-01 | 9.93E-01 |
| 6 | rs3094050  | 30358591 | C | 0.09 | 2.27  | 3.59E-02 | 3.97E-02 |

|   |            |          |   |      |       |          |          |
|---|------------|----------|---|------|-------|----------|----------|
| 6 | rs3094700  | 30360068 | A | 0.43 | 0.00  | 9.95E-01 | 9.16E-01 |
| 6 | rs3094697  | 30361232 | G | 0.43 | 0.00  | 9.95E-01 | 9.16E-01 |
| 6 | rs3094042  | 30361418 | T | 0.43 | 0.00  | 9.95E-01 | 9.16E-01 |
| 6 | rs2516685  | 30361608 | C | 0.43 | -0.04 | 9.51E-01 | 9.64E-01 |
| 6 | rs2516684  | 30362995 | T | 0.14 | 0.04  | 9.68E-01 | 8.66E-01 |
| 6 | rs3130113  | 30363945 | T | 0.43 | 0.01  | 9.91E-01 | 9.21E-01 |
| 6 | rs17475879 | 30364508 | T | 0.06 | -0.07 | 9.59E-01 | 8.69E-01 |
| 6 | rs1264569  | 30365320 | G | 0.23 | -0.60 | 4.17E-01 | 4.24E-01 |
| 6 | rs1264567  | 30366100 | G | 0.18 | -0.06 | 9.42E-01 | 9.94E-01 |
| 6 | rs12203316 | 30368012 | C | 0.21 | 0.91  | 2.44E-01 | 2.21E-01 |
| 6 | rs1034323  | 30368635 | A | 0.46 | -0.04 | 9.47E-01 | 9.09E-01 |
| 6 | rs9261743  | 30369040 | T | 0.25 | -0.85 | 2.47E-01 | 2.04E-01 |
| 6 | rs10947072 | 30372278 | T | 0.22 | 0.82  | 2.79E-01 | 2.51E-01 |
| 6 | rs7741364  | 30372570 | A | 0.42 | 0.48  | 4.59E-01 | 4.66E-01 |
| 6 | rs9261761  | 30372987 | A | 0.19 | -0.22 | 7.87E-01 | 7.25E-01 |
| 6 | rs1264551  | 30377173 | T | 0.22 | -0.19 | 8.03E-01 | 7.55E-01 |
| 6 | rs1264550  | 30377198 | T | 0.37 | -0.23 | 7.17E-01 | 7.60E-01 |
| 6 | rs1264547  | 30378447 | T | 0.22 | -0.19 | 8.03E-01 | 7.55E-01 |
| 6 | rs9261817  | 30378601 | C | 0.19 | -0.22 | 7.87E-01 | 7.25E-01 |
| 6 | rs9261821  | 30379074 | C | 0.19 | -0.22 | 7.87E-01 | 7.25E-01 |
| 6 | rs9261846  | 30382440 | C | 0.19 | -0.42 | 6.13E-01 | 5.33E-01 |
| 6 | rs9261847  | 30382647 | G | 0.19 | -0.35 | 6.66E-01 | 6.02E-01 |
| 6 | rs9261858  | 30384317 | A | 0.19 | -0.29 | 7.17E-01 | 6.58E-01 |
| 6 | rs2074502  | 30384322 | T | 0.22 | 0.81  | 2.93E-01 | 2.65E-01 |
| 6 | rs9261860  | 30384503 | A | 0.19 | -0.43 | 6.04E-01 | 5.30E-01 |
| 6 | rs9261862  | 30384738 | G | 0.19 | -0.29 | 7.17E-01 | 6.58E-01 |
| 6 | rs9261871  | 30385894 | G | 0.19 | -0.31 | 6.99E-01 | 6.41E-01 |
| 6 | rs1264542  | 30386996 | C | 0.41 | 0.15  | 8.21E-01 | 8.05E-01 |
| 6 | rs9261919  | 30391723 | A | 0.19 | -0.29 | 7.17E-01 | 6.58E-01 |
| 6 | rs9261922  | 30392146 | T | 0.21 | -0.17 | 8.24E-01 | 7.67E-01 |
| 6 | rs9261923  | 30392160 | A | 0.19 | -0.29 | 7.17E-01 | 6.58E-01 |
| 6 | rs9261926  | 30392406 | A | 0.19 | -0.29 | 7.17E-01 | 6.58E-01 |
| 6 | rs9261947  | 30394628 | T | 0.19 | -0.28 | 7.31E-01 | 6.81E-01 |
| 6 | rs9501447  | 30397840 | G | 0.19 | -0.29 | 7.17E-01 | 6.58E-01 |

|   |            |          |   |      |       |          |          |
|---|------------|----------|---|------|-------|----------|----------|
| 6 | rs1079541  | 30406756 | T | 0.19 | -0.28 | 7.24E-01 | 6.62E-01 |
| 6 | rs9501467  | 30408970 | T | 0.20 | -0.43 | 5.77E-01 | 5.21E-01 |
| 6 | rs1264518  | 30410206 | A | 0.15 | 0.04  | 9.60E-01 | 8.98E-01 |
| 6 | rs9295871  | 30411089 | C | 0.19 | -0.29 | 7.17E-01 | 6.58E-01 |
| 6 | rs1264514  | 30412045 | C | 0.42 | 0.23  | 7.16E-01 | 7.11E-01 |
| 6 | rs28512317 | 30413182 | C | 0.21 | -0.46 | 5.49E-01 | 5.10E-01 |
| 6 | rs9295873  | 30414235 | G | 0.19 | -0.29 | 7.17E-01 | 6.58E-01 |
| 6 | rs2524201  | 30415904 | G | 0.36 | 0.07  | 9.18E-01 | 8.84E-01 |
| 6 | rs4959047  | 30416553 | A | 0.21 | -0.46 | 5.49E-01 | 5.10E-01 |
| 6 | rs2844730  | 30417614 | T | 0.37 | 0.05  | 9.43E-01 | 9.09E-01 |
| 6 | rs4947284  | 30418662 | A | 0.02 | -1.52 | 4.80E-01 | 5.06E-01 |
| 6 | rs9295886  | 30421397 | T | 0.19 | -0.30 | 7.08E-01 | 6.46E-01 |
| 6 | rs2844729  | 30422632 | T | 0.42 | 0.31  | 6.25E-01 | 6.21E-01 |
| 6 | rs35407515 | 30423223 | G | 0.19 | -0.34 | 6.74E-01 | 6.16E-01 |
| 6 | rs34101875 | 30423358 | A | 0.19 | -0.34 | 6.74E-01 | 6.16E-01 |
| 6 | rs33986393 | 30424074 | G | 0.19 | -0.34 | 6.74E-01 | 6.16E-01 |
| 6 | rs28780104 | 30424655 | G | 0.06 | 0.64  | 6.24E-01 | 7.17E-01 |
| 6 | rs9501336  | 30427510 | A | 0.19 | -0.34 | 6.74E-01 | 6.16E-01 |
| 6 | rs2516676  | 30430482 | C | 0.16 | -0.45 | 5.92E-01 | 6.03E-01 |
| 6 | rs35792611 | 30430875 | G | 0.19 | -0.41 | 6.14E-01 | 5.70E-01 |
| 6 | rs10456384 | 30433090 | G | 0.05 | -0.25 | 8.54E-01 | 8.74E-01 |
| 6 | rs2524172  | 30433611 | T | 0.15 | -0.47 | 5.87E-01 | 6.13E-01 |
| 6 | rs7764934  | 30434566 | G | 0.45 | -0.24 | 7.08E-01 | 6.86E-01 |
| 6 | rs7747873  | 30434900 | C | 0.45 | -0.24 | 7.08E-01 | 6.86E-01 |
| 6 | rs6930977  | 30435288 | G | 0.18 | 0.77  | 3.45E-01 | 3.09E-01 |
| 6 | rs12174870 | 30436681 | A | 0.44 | -0.26 | 6.82E-01 | 6.61E-01 |
| 6 | rs12174433 | 30445476 | A | 0.05 | -2.31 | 9.85E-02 | 8.40E-02 |
| 6 | rs9295898  | 30449046 | T | 0.44 | -0.26 | 6.87E-01 | 6.66E-01 |
| 6 | rs2021720  | 30449244 | C | 0.44 | -0.29 | 6.54E-01 | 6.36E-01 |
| 6 | rs2021719  | 30449482 | T | 0.44 | -0.26 | 6.82E-01 | 6.61E-01 |
| 6 | rs28780106 | 30451515 | A | 0.06 | 0.56  | 6.72E-01 | 7.67E-01 |
| 6 | rs3094694  | 30451904 | G | 0.15 | 0.86  | 3.25E-01 | 3.22E-01 |
| 6 | rs1264459  | 30455920 | C | 0.17 | 0.04  | 9.63E-01 | 9.71E-01 |
| 6 | rs1264456  | 30462084 | T | 0.33 | 0.59  | 3.81E-01 | 3.58E-01 |



|   |            |          |   |      |       |          |          |
|---|------------|----------|---|------|-------|----------|----------|
| 6 | rs2508024  | 30465512 | A | 0.37 | 0.47  | 4.75E-01 | 4.54E-01 |
| 6 | rs34372168 | 30467745 | G | 0.02 | -2.69 | 2.90E-01 | 2.72E-01 |
| 6 | rs31311115 | 30468791 | T | 0.35 | -0.23 | 7.38E-01 | 6.63E-01 |
| 6 | rs2844724  | 30469190 | G | 0.35 | 0.70  | 2.92E-01 | 2.71E-01 |
| 6 | rs2429657  | 30471520 | C | 0.21 | -0.21 | 7.91E-01 | 8.39E-01 |
| 6 | rs2844720  | 30475717 | A | 0.35 | 0.68  | 3.10E-01 | 2.89E-01 |
| 6 | rs2844718  | 30477276 | A | 0.35 | 0.62  | 3.52E-01 | 3.30E-01 |
| 6 | rs975195   | 30477947 | C | 0.35 | 0.66  | 3.20E-01 | 2.98E-01 |
| 6 | rs2534812  | 30482993 | G | 0.37 | 0.44  | 5.01E-01 | 4.77E-01 |
| 6 | rs7746096  | 30483919 | A | 0.02 | -2.48 | 2.60E-01 | 2.41E-01 |
| 6 | rs10484552 | 30484036 | C | 0.06 | 0.21  | 8.82E-01 | 9.61E-01 |
| 6 | rs7767714  | 30488033 | G | 0.02 | -2.48 | 2.60E-01 | 2.41E-01 |
| 6 | rs7768140  | 30488203 | T | 0.02 | -2.52 | 2.51E-01 | 2.35E-01 |
| 6 | rs2534824  | 30496160 | T | 0.35 | 0.68  | 3.10E-01 | 2.89E-01 |
| 6 | rs2534823  | 30496816 | G | 0.35 | 0.68  | 3.10E-01 | 2.89E-01 |
| 6 | rs2516649  | 30496882 | C | 0.35 | 0.68  | 3.10E-01 | 2.89E-01 |
| 6 | rs2524226  | 30497490 | T | 0.33 | 0.56  | 4.02E-01 | 3.79E-01 |
| 6 | rs2534815  | 30499127 | G | 0.35 | 0.68  | 3.10E-01 | 2.89E-01 |
| 6 | rs2524224  | 30505948 | T | 0.36 | 0.42  | 5.23E-01 | 4.95E-01 |
| 6 | rs1058318  | 30512163 | A | 0.33 | 0.56  | 4.02E-01 | 3.79E-01 |
| 6 | rs12192673 | 30512505 | G | 0.05 | 0.41  | 7.74E-01 | 7.33E-01 |
| 6 | rs2844713  | 30519258 | T | 0.36 | 0.41  | 5.33E-01 | 5.10E-01 |
| 6 | rs3130240  | 30536071 | C | 0.34 | 0.53  | 4.27E-01 | 3.97E-01 |
| 6 | rs3130041  | 30536133 | C | 0.35 | 0.25  | 7.07E-01 | 6.80E-01 |
| 6 | rs3130242  | 30537339 | G | 0.34 | 0.57  | 3.92E-01 | 3.69E-01 |
| 6 | rs3132613  | 30537606 | G | 0.34 | 0.57  | 3.92E-01 | 3.69E-01 |
| 6 | rs3130243  | 30537853 | C | 0.35 | 0.26  | 6.95E-01 | 6.68E-01 |
| 6 | rs2269710  | 30539952 | G | 0.36 | 0.05  | 9.36E-01 | 9.31E-01 |
| 6 | rs1264451  | 30541237 | C | 0.33 | 0.54  | 4.16E-01 | 3.90E-01 |
| 6 | rs3132611  | 30541852 | C | 0.08 | 0.68  | 5.33E-01 | 5.27E-01 |
| 6 | rs3132610  | 30544401 | C | 0.10 | 1.65  | 1.15E-01 | 1.20E-01 |
| 6 | rs3130043  | 30545022 | G | 0.37 | 0.36  | 5.82E-01 | 5.55E-01 |
| 6 | rs1264440  | 30551286 | T | 0.35 | 0.31  | 6.39E-01 | 6.06E-01 |
| 6 | rs1264439  | 30552502 | T | 0.33 | 0.57  | 3.93E-01 | 3.67E-01 |

|   |            |          |   |      |       |          |          |
|---|------------|----------|---|------|-------|----------|----------|
| 6 | rs3130244  | 30552937 | A | 0.37 | 0.32  | 6.31E-01 | 6.02E-01 |
| 6 | rs17195446 | 30553853 | G | 0.01 | -0.59 | 8.41E-01 | 7.57E-01 |
| 6 | rs1264437  | 30553871 | G | 0.33 | 0.63  | 3.42E-01 | 3.16E-01 |
| 6 | rs9671     | 30559034 | C | 0.02 | -4.11 | 8.54E-02 | 8.20E-02 |
| 6 | rs13195066 | 30560796 | G | 0.20 | -0.49 | 5.39E-01 | 5.01E-01 |
| 6 | rs7749109  | 30561724 | G | 0.02 | -4.11 | 8.54E-02 | 8.20E-02 |
| 6 | rs1264432  | 30562021 | C | 0.33 | 0.63  | 3.42E-01 | 3.16E-01 |
| 6 | rs7749978  | 30562041 | A | 0.02 | -4.11 | 8.54E-02 | 8.20E-02 |
| 6 | rs6934466  | 30563608 | T | 0.02 | -4.11 | 8.55E-02 | 8.23E-02 |
| 6 | rs1264429  | 30565101 | G | 0.01 | -1.33 | 6.21E-01 | 6.24E-01 |
| 6 | rs7759666  | 30569489 | T | 0.15 | -0.32 | 7.19E-01 | 8.32E-01 |
| 6 | rs17195474 | 30571197 | A | 0.02 | -4.11 | 8.54E-02 | 8.20E-02 |
| 6 | rs7742291  | 30573139 | C | 0.02 | -4.11 | 8.54E-02 | 8.20E-02 |
| 6 | rs9262122  | 30573842 | C | 0.15 | -0.32 | 7.19E-01 | 8.29E-01 |
| 6 | rs1264420  | 30575603 | T | 0.33 | -0.32 | 6.25E-01 | 6.11E-01 |
| 6 | rs2267637  | 30578335 | T | 0.11 | -1.85 | 6.65E-02 | 5.81E-02 |
| 6 | rs2252745  | 30579315 | C | 0.33 | 0.58  | 3.84E-01 | 3.58E-01 |
| 6 | rs2267638  | 30580626 | A | 0.02 | -4.11 | 8.54E-02 | 8.20E-02 |
| 6 | rs16867845 | 30585333 | G | 0.02 | -3.76 | 1.19E-01 | 1.14E-01 |
| 6 | rs2270172  | 30592414 | G | 0.02 | -2.73 | 2.08E-01 | 2.04E-01 |
| 6 | rs2517565  | 30594394 | A | 0.04 | -1.48 | 3.49E-01 | 3.29E-01 |
| 6 | rs6904236  | 30596135 | G | 0.02 | -3.76 | 1.19E-01 | 1.14E-01 |
| 6 | rs12665339 | 30601232 | G | 0.17 | 0.88  | 2.87E-01 | 2.44E-01 |
| 6 | rs17195551 | 30601395 | T | 0.02 | -0.42 | 8.45E-01 | 8.53E-01 |
| 6 | rs3094104  | 30609629 | C | 0.04 | -1.48 | 3.49E-01 | 3.29E-01 |
| 6 | rs3132608  | 30609661 | G | 0.04 | -0.84 | 6.26E-01 | 6.07E-01 |
| 6 | rs1140809  | 30611676 | A | 0.47 | -0.09 | 8.93E-01 | 8.87E-01 |
| 6 | rs9262135  | 30618906 | G | 0.09 | 1.92  | 7.51E-02 | 7.66E-02 |
| 6 | rs17281677 | 30622459 | A | 0.03 | -2.93 | 1.08E-01 | 1.00E-01 |
| 6 | rs34057232 | 30623069 | G | 0.02 | -0.70 | 7.32E-01 | 7.41E-01 |
| 6 | rs3094100  | 30625155 | G | 0.06 | -1.34 | 3.23E-01 | 3.12E-01 |
| 6 | rs9262138  | 30627867 | C | 0.08 | -0.88 | 4.55E-01 | 5.39E-01 |
| 6 | rs3130000  | 30628082 | A | 0.09 | 0.72  | 5.08E-01 | 5.04E-01 |
| 6 | rs1076828  | 30628252 | T | 0.32 | 0.77  | 2.62E-01 | 2.40E-01 |

|   |            |          |   |      |       |          |          |
|---|------------|----------|---|------|-------|----------|----------|
| 6 | rs4713346  | 30631063 | A | 0.01 | -3.49 | 2.21E-01 | 2.40E-01 |
| 6 | rs3094097  | 30633875 | C | 0.06 | -1.31 | 3.30E-01 | 3.18E-01 |
| 6 | rs2285321  | 30637998 | C | 0.02 | -3.51 | 1.58E-01 | 1.38E-01 |
| 6 | rs9295901  | 30639157 | C | 0.02 | -1.34 | 5.61E-01 | 4.90E-01 |
| 6 | rs6937357  | 30640324 | C | 0.02 | -3.21 | 1.92E-01 | 1.66E-01 |
| 6 | rs28360604 | 30643767 | G | 0.19 | -0.06 | 9.42E-01 | 9.35E-01 |
| 6 | rs2394392  | 30650318 | G | 0.06 | -0.67 | 6.10E-01 | 5.46E-01 |
| 6 | rs9262143  | 30652781 | T | 0.09 | 1.84  | 8.58E-02 | 8.74E-02 |
| 6 | rs2269706  | 30652872 | T | 0.08 | -2.25 | 5.40E-02 | 5.00E-02 |
| 6 | rs17189280 | 30656382 | C | 0.02 | 0.08  | 9.71E-01 | 9.92E-01 |
| 6 | rs3094092  | 30657015 | A | 0.08 | 0.68  | 5.36E-01 | 5.34E-01 |
| 6 | rs1075496  | 30658239 | T | 0.40 | 0.27  | 6.76E-01 | 6.52E-01 |
| 6 | rs7565     | 30668159 | A | 0.02 | -0.86 | 7.19E-01 | 7.25E-01 |
| 6 | rs9405048  | 30670292 | T | 0.17 | 1.06  | 2.06E-01 | 1.79E-01 |
| 6 | rs2239886  | 30670700 | G | 0.03 | -2.02 | 2.41E-01 | 2.21E-01 |
| 6 | rs28994872 | 30671650 | C | 0.01 | -1.28 | 6.95E-01 | 7.63E-01 |
| 6 | rs28994868 | 30673681 | T | 0.02 | -0.86 | 7.19E-01 | 7.25E-01 |
| 6 | rs28986466 | 30676046 | C | 0.02 | -0.21 | 9.22E-01 | 9.33E-01 |
| 6 | rs3094093  | 30679628 | A | 0.06 | 0.85  | 4.95E-01 | 4.83E-01 |
| 6 | rs9262152  | 30680916 | T | 0.15 | -0.36 | 6.93E-01 | 8.00E-01 |
| 6 | rs6924270  | 30681980 | G | 0.03 | -2.02 | 2.41E-01 | 2.21E-01 |
| 6 | rs3132587  | 30685066 | T | 0.08 | 0.82  | 4.59E-01 | 4.59E-01 |
| 6 | rs3132585  | 30687614 | G | 0.10 | 1.70  | 1.07E-01 | 1.09E-01 |
| 6 | rs9295910  | 30687714 | A | 0.05 | 0.30  | 8.40E-01 | 8.55E-01 |
| 6 | rs3132583  | 30688575 | G | 0.10 | 1.72  | 1.04E-01 | 1.05E-01 |
| 6 | rs3132582  | 30689001 | T | 0.10 | 1.60  | 1.22E-01 | 1.28E-01 |
| 6 | rs25526    | 30690816 | T | 0.02 | -2.37 | 2.94E-01 | 2.66E-01 |
| 6 | rs11546742 | 30692768 | G | 0.03 | 1.74  | 3.15E-01 | 3.03E-01 |
| 6 | rs9500864  | 30693232 | A | 0.01 | -1.41 | 6.16E-01 | 5.84E-01 |
| 6 | rs3095329  | 30693816 | C | 0.19 | 0.98  | 2.15E-01 | 2.40E-01 |
| 6 | rs3094127  | 30697447 | C | 0.19 | 0.93  | 2.36E-01 | 2.59E-01 |
| 6 | rs12179975 | 30697561 | C | 0.01 | -1.86 | 5.03E-01 | 4.73E-01 |
| 6 | rs9500867  | 30697931 | C | 0.01 | -1.86 | 5.03E-01 | 4.73E-01 |
| 6 | rs3909184  | 30699384 | G | 0.03 | 0.95  | 5.85E-01 | 5.81E-01 |

|   |            |          |   |      |       |          |          |
|---|------------|----------|---|------|-------|----------|----------|
| 6 | rs9262155  | 30700497 | G | 0.10 | -1.86 | 7.42E-02 | 6.54E-02 |
| 6 | rs9969042  | 30700558 | G | 0.03 | 0.95  | 5.85E-01 | 5.81E-01 |
| 6 | rs2844704  | 30706013 | T | 0.19 | 0.12  | 8.87E-01 | 8.78E-01 |
| 6 | rs12111310 | 30708428 | C | 0.03 | 0.95  | 5.85E-01 | 5.81E-01 |
| 6 | rs1059612  | 30708955 | A | 0.09 | 1.79  | 9.52E-02 | 9.76E-02 |
| 6 | rs10947088 | 30709830 | C | 0.03 | 0.95  | 5.85E-01 | 5.81E-01 |
| 6 | rs1049943  | 30711026 | C | 0.03 | 0.95  | 5.85E-01 | 5.81E-01 |
| 6 | rs8512     | 30711357 | T | 0.16 | -0.42 | 6.29E-01 | 7.47E-01 |
| 6 | rs2535319  | 30714479 | G | 0.38 | 0.46  | 4.77E-01 | 5.13E-01 |
| 6 | rs7752674  | 30715637 | G | 0.03 | -1.37 | 4.55E-01 | 4.13E-01 |
| 6 | rs7753860  | 30716076 | T | 0.03 | -1.80 | 3.33E-01 | 2.98E-01 |
| 6 | rs12210092 | 30716719 | T | 0.05 | -0.31 | 8.36E-01 | 8.79E-01 |
| 6 | rs7763502  | 30717637 | A | 0.17 | -0.56 | 5.03E-01 | 4.52E-01 |
| 6 | rs2535323  | 30718180 | C | 0.15 | -1.39 | 1.15E-01 | 9.68E-02 |
| 6 | rs12202428 | 30719909 | G | 0.03 | 1.41  | 4.26E-01 | 3.87E-01 |
| 6 | rs28780111 | 30720311 | T | 0.15 | -1.81 | 3.70E-02 | 2.93E-02 |
| 6 | rs3129973  | 30721143 | T | 0.10 | 1.91  | 6.44E-02 | 6.86E-02 |
| 6 | rs3095328  | 30723781 | T | 0.10 | 1.78  | 8.91E-02 | 9.43E-02 |
| 6 | rs2394401  | 30724430 | C | 0.12 | -0.44 | 6.48E-01 | 6.94E-01 |
| 6 | rs3095341  | 30726748 | A | 0.38 | -0.04 | 9.51E-01 | 9.55E-01 |
| 6 | rs3095340  | 30726939 | G | 0.14 | 1.57  | 7.88E-02 | 9.28E-02 |
| 6 | rs3094122  | 30728360 | C | 0.22 | 1.01  | 1.88E-01 | 1.65E-01 |
| 6 | rs11966040 | 30729487 | G | 0.02 | 1.41  | 5.00E-01 | 4.91E-01 |
| 6 | rs3094121  | 30730960 | A | 0.21 | 0.83  | 2.82E-01 | 2.50E-01 |
| 6 | rs9262176  | 30731330 | T | 0.03 | -2.38 | 1.73E-01 | 1.34E-01 |
| 6 | rs13214831 | 30731505 | A | 0.15 | -1.84 | 3.32E-02 | 2.63E-02 |
| 6 | rs3129975  | 30732054 | C | 0.21 | 0.83  | 2.82E-01 | 2.50E-01 |
| 6 | rs12210947 | 30735105 | G | 0.17 | 1.14  | 1.81E-01 | 1.57E-01 |
| 6 | rs11963870 | 30735229 | A | 0.02 | 1.41  | 5.00E-01 | 4.91E-01 |
| 6 | rs11964596 | 30736541 | A | 0.02 | 1.32  | 5.31E-01 | 5.24E-01 |
| 6 | rs3094117  | 30737486 | G | 0.26 | 0.56  | 4.30E-01 | 4.21E-01 |
| 6 | rs3094116  | 30738408 | A | 0.25 | 0.17  | 8.14E-01 | 8.42E-01 |
| 6 | rs6911628  | 30739846 | T | 0.25 | 0.17  | 8.14E-01 | 8.42E-01 |
| 6 | rs3130666  | 30740160 | A | 0.03 | -1.97 | 2.64E-01 | 2.45E-01 |

|   |            |          |   |      |       |          |          |
|---|------------|----------|---|------|-------|----------|----------|
| 6 | rs16897888 | 30740515 | A | 0.16 | 0.95  | 2.74E-01 | 2.33E-01 |
| 6 | rs16897889 | 30740680 | G | 0.16 | 0.95  | 2.74E-01 | 2.33E-01 |
| 6 | rs17481190 | 30743014 | T | 0.15 | -1.84 | 3.43E-02 | 2.66E-02 |
| 6 | rs11757629 | 30744529 | C | 0.03 | 3.07  | 1.25E-01 | 1.29E-01 |
| 6 | rs13220225 | 30747802 | A | 0.15 | -1.83 | 3.38E-02 | 2.59E-02 |
| 6 | rs3132599  | 30748164 | C | 0.11 | 1.85  | 6.74E-02 | 7.17E-02 |
| 6 | rs9468829  | 30749233 | G | 0.13 | -0.62 | 5.15E-01 | 5.26E-01 |
| 6 | rs9468830  | 30749712 | G | 0.31 | -1.36 | 4.42E-02 | 3.72E-02 |
| 6 | rs17189427 | 30750229 | A | 0.02 | 0.70  | 7.54E-01 | 7.35E-01 |
| 6 | rs28780116 | 30755668 | C | 0.31 | -1.36 | 4.42E-02 | 3.72E-02 |
| 6 | rs16897900 | 30755893 | A | 0.31 | -1.36 | 4.42E-02 | 3.72E-02 |
| 6 | rs13201769 | 30756066 | A | 0.31 | -1.36 | 4.42E-02 | 3.72E-02 |
| 6 | rs4711228  | 30756274 | T | 0.31 | -1.36 | 4.42E-02 | 3.72E-02 |
| 6 | rs4713366  | 30756361 | T | 0.31 | -1.39 | 4.10E-02 | 3.44E-02 |
| 6 | rs3131043  | 30758466 | G | 0.41 | -0.53 | 4.02E-01 | 3.63E-01 |
| 6 | rs17189441 | 30758555 | T | 0.15 | -1.84 | 3.33E-02 | 2.61E-02 |
| 6 | rs3131050  | 30760025 | C | 0.11 | 1.83  | 7.03E-02 | 7.49E-02 |
| 6 | rs34682678 | 30760639 | C | 0.08 | -0.90 | 4.41E-01 | 5.23E-01 |
| 6 | rs3094112  | 30761734 | G | 0.22 | 0.57  | 4.53E-01 | 4.18E-01 |
| 6 | rs3129985  | 30762542 | T | 0.11 | 1.83  | 7.03E-02 | 7.49E-02 |
| 6 | rs3131060  | 30763291 | A | 0.11 | 1.83  | 7.03E-02 | 7.49E-02 |
| 6 | rs3131063  | 30763756 | A | 0.44 | 1.48  | 2.23E-02 | 1.88E-02 |
| 6 | rs12660883 | 30764420 | C | 0.15 | -1.93 | 2.56E-02 | 2.01E-02 |
| 6 | rs1264377  | 30764907 | T | 0.15 | 1.43  | 1.05E-01 | 1.19E-01 |
| 6 | rs12190167 | 30766194 | A | 0.13 | 0.89  | 3.45E-01 | 2.92E-01 |
| 6 | rs12197154 | 30766244 | C | 0.13 | 0.79  | 4.04E-01 | 3.49E-01 |
| 6 | rs4639381  | 30766765 | G | 0.28 | -0.71 | 3.00E-01 | 3.15E-01 |
| 6 | rs4713370  | 30767538 | C | 0.28 | -0.71 | 3.00E-01 | 3.15E-01 |
| 6 | rs4711235  | 30768636 | C | 0.28 | -0.71 | 3.00E-01 | 3.15E-01 |
| 6 | rs3129988  | 30769478 | T | 0.07 | -0.44 | 7.17E-01 | 7.20E-01 |
| 6 | rs9295919  | 30770000 | T | 0.28 | -0.72 | 2.96E-01 | 3.11E-01 |
| 6 | rs13198118 | 30770732 | G | 0.14 | -1.29 | 1.47E-01 | 1.29E-01 |
| 6 | rs9380192  | 30772344 | G | 0.28 | -0.71 | 3.00E-01 | 3.15E-01 |
| 6 | rs3094123  | 30772378 | T | 0.16 | -0.12 | 8.86E-01 | 8.93E-01 |

|   |            |          |   |      |       |          |          |
|---|------------|----------|---|------|-------|----------|----------|
| 6 | rs4713376  | 30773314 | C | 0.14 | 0.11  | 9.08E-01 | 8.22E-01 |
| 6 | rs9378109  | 30774474 | A | 0.14 | -0.98 | 2.76E-01 | 2.50E-01 |
| 6 | rs1264362  | 30776590 | C | 0.34 | -0.16 | 8.13E-01 | 8.38E-01 |
| 6 | rs1264361  | 30777498 | C | 0.11 | 1.59  | 1.08E-01 | 1.12E-01 |
| 6 | rs9380197  | 30778203 | A | 0.29 | -0.49 | 4.71E-01 | 5.00E-01 |
| 6 | rs4327730  | 30780936 | T | 0.12 | 0.57  | 5.51E-01 | 4.76E-01 |
| 6 | rs915665   | 30781381 | T | 0.01 | 2.62  | 3.44E-01 | 3.62E-01 |
| 6 | rs12210318 | 30781904 | A | 0.12 | 0.57  | 5.51E-01 | 4.76E-01 |
| 6 | rs886424   | 30782002 | A | 0.11 | 1.57  | 1.14E-01 | 1.18E-01 |
| 6 | rs2894046  | 30782105 | C | 0.29 | -0.53 | 4.32E-01 | 4.59E-01 |
| 6 | rs2394412  | 30782235 | A | 0.29 | -0.54 | 4.27E-01 | 4.53E-01 |
| 6 | rs4713380  | 30785273 | C | 0.15 | -1.02 | 2.42E-01 | 2.22E-01 |
| 6 | rs12192760 | 30785385 | C | 0.12 | 0.34  | 7.25E-01 | 6.37E-01 |
| 6 | rs9348843  | 30786676 | A | 0.29 | -0.57 | 4.04E-01 | 4.27E-01 |
| 6 | rs4713385  | 30787593 | A | 0.15 | -1.02 | 2.42E-01 | 2.22E-01 |
| 6 | rs16897921 | 30789526 | A | 0.14 | 0.11  | 9.08E-01 | 8.23E-01 |
| 6 | rs12195964 | 30790481 | G | 0.14 | 0.11  | 9.08E-01 | 8.23E-01 |
| 6 | rs4947289  | 30791409 | T | 0.15 | -0.95 | 2.77E-01 | 2.56E-01 |
| 6 | rs4713391  | 30792235 | C | 0.14 | 0.11  | 9.00E-01 | 8.15E-01 |
| 6 | rs12192704 | 30792270 | A | 0.14 | 0.00  | 9.97E-01 | 9.13E-01 |
| 6 | rs915664   | 30794617 | G | 0.34 | -0.37 | 5.75E-01 | 5.88E-01 |
| 6 | rs9380199  | 30796271 | G | 0.29 | -0.62 | 3.59E-01 | 3.82E-01 |
| 6 | rs1264350  | 30796545 | G | 0.13 | 1.22  | 1.91E-01 | 1.96E-01 |
| 6 | rs12198723 | 30796734 | G | 0.12 | 0.41  | 6.70E-01 | 5.89E-01 |
| 6 | rs3130785  | 30796738 | T | 0.15 | -0.17 | 8.47E-01 | 8.52E-01 |
| 6 | rs1264348  | 30798473 | G | 0.32 | 0.88  | 1.89E-01 | 2.11E-01 |
| 6 | rs3130647  | 30799072 | A | 0.36 | -0.73 | 2.63E-01 | 2.65E-01 |
| 6 | rs9501030  | 30799399 | A | 0.17 | -0.47 | 5.81E-01 | 5.55E-01 |
| 6 | rs1264344  | 30800577 | A | 0.48 | 0.68  | 2.76E-01 | 2.66E-01 |
| 6 | rs1264341  | 30802465 | G | 0.11 | 1.42  | 1.67E-01 | 1.66E-01 |
| 6 | rs3130649  | 30803254 | A | 0.41 | -1.21 | 5.62E-02 | 5.37E-02 |
| 6 | rs3095352  | 30805921 | G | 0.41 | -1.20 | 5.76E-02 | 5.53E-02 |
| 6 | rs2517581  | 30809664 | A | 0.02 | 2.13  | 4.19E-01 | 3.96E-01 |
| 6 | rs2535336  | 30810654 | G | 0.41 | 0.32  | 6.06E-01 | 6.47E-01 |

|   |            |          |   |      |       |          |          |
|---|------------|----------|---|------|-------|----------|----------|
| 6 | rs7759803  | 30812519 | A | 0.03 | -0.83 | 6.55E-01 | 6.91E-01 |
| 6 | rs2517576  | 30815035 | T | 0.19 | 1.24  | 1.27E-01 | 1.08E-01 |
| 6 | rs2535331  | 30816270 | T | 0.39 | 0.46  | 4.71E-01 | 4.72E-01 |
| 6 | rs3132578  | 30816865 | T | 0.40 | -1.06 | 9.43E-02 | 9.44E-02 |
| 6 | rs2250264  | 30821187 | A | 0.28 | 0.26  | 7.00E-01 | 7.05E-01 |
| 6 | rs3095345  | 30822413 | G | 0.14 | -1.18 | 1.83E-01 | 1.86E-01 |
| 6 | rs3130653  | 30822771 | C | 0.40 | -1.07 | 9.15E-02 | 9.17E-02 |
| 6 | rs9295928  | 30823630 | C | 0.15 | -0.13 | 8.80E-01 | 8.65E-01 |
| 6 | rs2844660  | 30823760 | G | 0.14 | 0.02  | 9.83E-01 | 9.86E-01 |
| 6 | rs2844659  | 30824532 | A | 0.19 | 1.20  | 1.37E-01 | 1.17E-01 |
| 6 | rs9468841  | 30825287 | C | 0.08 | -0.38 | 7.41E-01 | 7.52E-01 |
| 6 | rs2535327  | 30826904 | G | 0.38 | 0.45  | 4.82E-01 | 4.81E-01 |
| 6 | rs2844657  | 30829522 | C | 0.19 | 1.20  | 1.37E-01 | 1.17E-01 |
| 6 | rs7761138  | 30830292 | A | 0.08 | 0.65  | 5.71E-01 | 4.97E-01 |
| 6 | rs3130791  | 30831843 | T | 0.40 | -1.07 | 9.15E-02 | 9.17E-02 |
| 6 | rs3130793  | 30832357 | T | 0.40 | -1.08 | 8.92E-02 | 9.07E-02 |
| 6 | rs3130794  | 30832810 | T | 0.40 | -1.08 | 8.92E-02 | 9.07E-02 |
| 6 | rs10947109 | 30836225 | C | 0.02 | 5.15  | 4.79E-02 | 4.85E-02 |
| 6 | rs2535340  | 30838497 | G | 0.11 | 1.42  | 1.67E-01 | 1.66E-01 |
| 6 | rs2844654  | 30838688 | C | 0.39 | 0.46  | 4.71E-01 | 4.72E-01 |
| 6 | rs3132573  | 30840688 | T | 0.37 | -0.99 | 1.24E-01 | 1.21E-01 |
| 6 | rs3130796  | 30840950 | C | 0.40 | -1.08 | 8.92E-02 | 9.07E-02 |
| 6 | rs7746003  | 30842894 | A | 0.03 | -0.57 | 7.67E-01 | 8.34E-01 |
| 6 | rs1264333  | 30844314 | G | 0.39 | 0.46  | 4.71E-01 | 4.72E-01 |
| 6 | rs1264331  | 30846830 | A | 0.39 | 0.50  | 4.35E-01 | 4.38E-01 |
| 6 | rs7756521  | 30848253 | C | 0.19 | -0.31 | 6.99E-01 | 7.00E-01 |
| 6 | rs885910   | 30849124 | A | 0.37 | 0.56  | 3.79E-01 | 3.51E-01 |
| 6 | rs9295930  | 30849822 | A | 0.15 | -0.13 | 8.80E-01 | 8.65E-01 |
| 6 | rs9501032  | 30850191 | C | 0.19 | -0.30 | 7.11E-01 | 7.11E-01 |
| 6 | rs9461638  | 30851305 | C | 0.19 | -0.30 | 7.11E-01 | 7.11E-01 |
| 6 | rs9468842  | 30852747 | T | 0.19 | -0.35 | 6.66E-01 | 6.69E-01 |
| 6 | rs3131034  | 30853796 | G | 0.21 | -1.36 | 7.18E-02 | 7.37E-02 |
| 6 | rs6901464  | 30854090 | T | 0.19 | -0.30 | 7.11E-01 | 7.11E-01 |
| 6 | rs4618569  | 30855251 | A | 0.19 | -0.30 | 7.11E-01 | 7.11E-01 |

|   |            |          |   |      |       |          |          |
|---|------------|----------|---|------|-------|----------|----------|
| 6 | rs1264323  | 30855907 | T | 0.37 | 0.56  | 3.76E-01 | 3.48E-01 |
| 6 | rs2229933  | 30857072 | C | 0.19 | -0.28 | 7.30E-01 | 7.29E-01 |
| 6 | rs1264319  | 30862423 | A | 0.19 | 1.16  | 1.51E-01 | 1.33E-01 |
| 6 | rs1264318  | 30863530 | C | 0.19 | 1.16  | 1.51E-01 | 1.33E-01 |
| 6 | rs886422   | 30864279 | A | 0.11 | 1.44  | 1.61E-01 | 1.60E-01 |
| 6 | rs1049623  | 30864829 | G | 0.37 | 0.55  | 3.83E-01 | 3.56E-01 |
| 6 | rs6933271  | 30867830 | G | 0.01 | 0.40  | 8.79E-01 | 9.99E-01 |
| 6 | rs9295931  | 30869714 | T | 0.19 | -0.27 | 7.42E-01 | 7.43E-01 |
| 6 | rs3869086  | 30870168 | A | 0.19 | -0.27 | 7.42E-01 | 7.43E-01 |
| 6 | rs12206075 | 30871000 | C | 0.19 | -0.23 | 7.72E-01 | 7.70E-01 |
| 6 | rs13215409 | 30871619 | A | 0.19 | -0.27 | 7.42E-01 | 7.43E-01 |
| 6 | rs2284175  | 30875145 | C | 0.19 | -0.27 | 7.42E-01 | 7.43E-01 |
| 6 | rs1052693  | 30876152 | T | 0.19 | -0.27 | 7.42E-01 | 7.43E-01 |
| 6 | rs3218816  | 30878857 | A | 0.04 | -2.09 | 2.09E-01 | 2.14E-01 |
| 6 | rs886420   | 30879636 | A | 0.10 | 1.50  | 1.44E-01 | 1.43E-01 |
| 6 | rs3218822  | 30880336 | C | 0.03 | -0.12 | 9.52E-01 | 9.90E-01 |
| 6 | rs1264304  | 30882415 | A | 0.11 | 1.39  | 1.76E-01 | 1.75E-01 |
| 6 | rs1264303  | 30882513 | C | 0.39 | 0.56  | 3.81E-01 | 3.87E-01 |
| 6 | rs1264302  | 30882634 | A | 0.39 | 0.56  | 3.81E-01 | 3.87E-01 |
| 6 | rs1264301  | 30882781 | A | 0.39 | 0.56  | 3.88E-01 | 3.95E-01 |
| 6 | rs1264298  | 30884436 | C | 0.39 | 0.56  | 3.81E-01 | 3.87E-01 |
| 6 | rs9262288  | 30885639 | G | 0.39 | 0.56  | 3.81E-01 | 3.87E-01 |
| 6 | rs9262290  | 30885821 | A | 0.39 | 0.56  | 3.81E-01 | 3.87E-01 |
| 6 | rs9262293  | 30886350 | G | 0.39 | 0.56  | 3.81E-01 | 3.87E-01 |
| 6 | rs2517468  | 30888169 | T | 0.39 | 0.56  | 3.81E-01 | 3.87E-01 |
| 6 | rs7766094  | 30888617 | A | 0.07 | -0.53 | 6.73E-01 | 7.59E-01 |
| 6 | rs2517467  | 30889260 | C | 0.45 | -0.39 | 5.33E-01 | 5.49E-01 |
| 6 | rs2074511  | 30889389 | G | 0.16 | -0.33 | 7.02E-01 | 6.82E-01 |
| 6 | rs885905   | 30890431 | T | 0.26 | -0.97 | 1.77E-01 | 1.60E-01 |
| 6 | rs2074506  | 30890483 | A | 0.39 | 0.59  | 3.60E-01 | 3.66E-01 |
| 6 | rs753725   | 30890871 | A | 0.45 | -0.40 | 5.27E-01 | 5.43E-01 |
| 6 | rs2532938  | 30893831 | T | 0.39 | 0.54  | 3.97E-01 | 4.02E-01 |
| 6 | rs4678     | 30893941 | T | 0.20 | 0.54  | 4.93E-01 | 4.33E-01 |
| 6 | rs2532934  | 30894759 | C | 0.45 | -0.38 | 5.44E-01 | 5.60E-01 |



|   |            |          |   |      |       |          |          |
|---|------------|----------|---|------|-------|----------|----------|
| 6 | rs3873332  | 30895990 | C | 0.16 | -0.13 | 8.85E-01 | 8.68E-01 |
| 6 | rs3873334  | 30896147 | T | 0.16 | -0.28 | 7.39E-01 | 7.25E-01 |
| 6 | rs2517459  | 30897022 | A | 0.22 | -1.24 | 9.75E-02 | 1.00E-01 |
| 6 | rs2532929  | 30897774 | C | 0.40 | 0.57  | 3.69E-01 | 3.77E-01 |
| 6 | rs2844652  | 30898687 | A | 0.39 | 0.55  | 3.91E-01 | 3.96E-01 |
| 6 | rs2286655  | 30899746 | T | 0.16 | -0.13 | 8.85E-01 | 8.68E-01 |
| 6 | rs2844651  | 30900664 | A | 0.46 | -0.38 | 5.46E-01 | 5.60E-01 |
| 6 | rs7764239  | 30900919 | A | 0.06 | -1.06 | 4.14E-01 | 5.01E-01 |
| 6 | rs10947114 | 30902181 | T | 0.15 | -0.08 | 9.28E-01 | 9.15E-01 |
| 6 | rs2844649  | 30904272 | T | 0.09 | -0.33 | 7.57E-01 | 7.70E-01 |
| 6 | rs12697941 | 30904714 | A | 0.15 | -0.13 | 8.80E-01 | 8.65E-01 |
| 6 | rs3132571  | 30905313 | C | 0.36 | -0.22 | 7.43E-01 | 7.44E-01 |
| 6 | rs6933400  | 30907176 | T | 0.13 | -1.80 | 5.70E-02 | 5.52E-02 |
| 6 | rs6933909  | 30907266 | A | 0.13 | -1.87 | 4.54E-02 | 4.55E-02 |
| 6 | rs3131921  | 30907335 | G | 0.13 | 1.16  | 2.10E-01 | 2.03E-01 |
| 6 | rs4711249  | 30908266 | A | 0.16 | -0.15 | 8.60E-01 | 8.40E-01 |
| 6 | rs13206144 | 30912382 | A | 0.02 | -1.76 | 4.57E-01 | 4.24E-01 |
| 6 | rs2844702  | 30912481 | T | 0.39 | 0.48  | 4.59E-01 | 4.63E-01 |
| 6 | rs2844701  | 30912691 | C | 0.10 | -0.55 | 6.02E-01 | 6.16E-01 |
| 6 | rs2517451  | 30914751 | G | 0.09 | -0.29 | 7.88E-01 | 8.01E-01 |
| 6 | rs3130782  | 30914843 | T | 0.14 | 1.34  | 1.34E-01 | 1.35E-01 |
| 6 | rs3132580  | 30920124 | T | 0.13 | 1.24  | 1.86E-01 | 1.76E-01 |
| 6 | rs2240804  | 30920890 | T | 0.38 | 0.43  | 5.07E-01 | 5.11E-01 |
| 6 | rs3757340  | 30921882 | C | 0.28 | -1.04 | 1.37E-01 | 1.31E-01 |
| 6 | rs12212418 | 30924024 | T | 0.28 | -1.04 | 1.37E-01 | 1.31E-01 |
| 6 | rs11753326 | 30925985 | C | 0.09 | 0.40  | 7.09E-01 | 6.96E-01 |
| 6 | rs2844697  | 30932309 | A | 0.34 | -0.23 | 7.34E-01 | 7.21E-01 |
| 6 | rs3095150  | 30932532 | G | 0.36 | -0.49 | 4.54E-01 | 4.30E-01 |
| 6 | rs2532924  | 30932682 | A | 0.42 | -0.54 | 3.88E-01 | 3.83E-01 |
| 6 | rs3095089  | 30933794 | A | 0.17 | 0.73  | 3.88E-01 | 3.88E-01 |
| 6 | rs2532919  | 30933975 | G | 0.15 | -1.23 | 1.61E-01 | 1.55E-01 |
| 6 | rs2844690  | 30940032 | A | 0.14 | -0.75 | 4.06E-01 | 3.88E-01 |
| 6 | rs17196185 | 30940505 | T | 0.05 | 2.64  | 6.99E-02 | 6.79E-02 |
| 6 | rs2517446  | 30940945 | C | 0.14 | -0.76 | 3.94E-01 | 3.78E-01 |

|   |            |          |   |      |       |          |          |
|---|------------|----------|---|------|-------|----------|----------|
| 6 | rs9262315  | 30942387 | C | 0.14 | -0.76 | 3.94E-01 | 3.78E-01 |
| 6 | rs2517442  | 30942447 | T | 0.14 | -0.76 | 3.94E-01 | 3.78E-01 |
| 6 | rs3131931  | 30945265 | T | 0.24 | 1.16  | 1.22E-01 | 1.13E-01 |
| 6 | rs34853064 | 30945625 | T | 0.07 | -0.04 | 9.73E-01 | 9.94E-01 |
| 6 | rs2844682  | 30946148 | T | 0.14 | -0.72 | 4.19E-01 | 4.03E-01 |
| 6 | rs2844680  | 30946496 | A | 0.42 | 0.10  | 8.72E-01 | 8.07E-01 |
| 6 | rs9394023  | 30947042 | A | 0.15 | -0.99 | 2.47E-01 | 2.06E-01 |
| 6 | rs2517431  | 30947378 | T | 0.28 | 0.25  | 7.28E-01 | 6.85E-01 |
| 6 | rs3094084  | 30947509 | A | 0.16 | 1.12  | 2.09E-01 | 1.87E-01 |
| 6 | rs2517426  | 30949430 | T | 0.14 | -0.65 | 4.68E-01 | 4.60E-01 |
| 6 | rs2517425  | 30949670 | C | 0.26 | 1.05  | 1.45E-01 | 1.45E-01 |
| 6 | rs2517422  | 30950589 | A | 0.14 | -0.72 | 4.19E-01 | 4.03E-01 |
| 6 | rs2530700  | 30951367 | G | 0.14 | -0.72 | 4.19E-01 | 4.03E-01 |
| 6 | rs2517419  | 30952873 | T | 0.14 | -0.72 | 4.19E-01 | 4.03E-01 |
| 6 | rs2530699  | 30953240 | A | 0.14 | -0.72 | 4.19E-01 | 4.03E-01 |
| 6 | rs1634731  | 30955681 | G | 0.17 | -0.25 | 7.64E-01 | 7.90E-01 |
| 6 | rs886403   | 30957618 | C | 0.25 | 1.27  | 8.33E-02 | 8.67E-02 |
| 6 | rs3873342  | 30957766 | G | 0.10 | 0.86  | 4.13E-01 | 3.87E-01 |
| 6 | rs34503701 | 30960221 | T | 0.07 | -0.04 | 9.73E-01 | 9.94E-01 |
| 6 | rs2844673  | 30961926 | A | 0.14 | -0.89 | 3.19E-01 | 3.08E-01 |
| 6 | rs9468857  | 30963143 | G | 0.01 | -1.36 | 6.77E-01 | 6.84E-01 |
| 6 | rs2517409  | 30964393 | G | 0.14 | -0.86 | 3.36E-01 | 3.22E-01 |
| 6 | rs2252926  | 30966304 | G | 0.14 | -0.86 | 3.36E-01 | 3.22E-01 |
| 6 | rs2517408  | 30966453 | G | 0.13 | -0.68 | 4.68E-01 | 4.40E-01 |
| 6 | rs2429295  | 30969498 | G | 0.14 | -0.90 | 3.11E-01 | 2.97E-01 |
| 6 | rs2508016  | 30969527 | C | 0.16 | -0.43 | 6.13E-01 | 5.87E-01 |
| 6 | rs2844668  | 30972121 | A | 0.21 | -0.49 | 5.17E-01 | 5.35E-01 |
| 6 | rs380808   | 30972202 | T | 0.14 | -0.84 | 3.48E-01 | 3.36E-01 |
| 6 | rs436376   | 30972390 | A | 0.14 | -0.86 | 3.36E-01 | 3.22E-01 |
| 6 | rs1634717  | 30972589 | T | 0.41 | 0.63  | 3.28E-01 | 3.39E-01 |
| 6 | rs1634718  | 30972865 | G | 0.24 | 1.27  | 9.09E-02 | 8.54E-02 |
| 6 | rs1634719  | 30973165 | G | 0.26 | 1.36  | 5.97E-02 | 6.06E-02 |
| 6 | rs2523921  | 30975090 | C | 0.14 | -0.86 | 3.36E-01 | 3.22E-01 |
| 6 | rs2523923  | 30975141 | A | 0.14 | -0.86 | 3.36E-01 | 3.21E-01 |

|   |            |          |   |      |       |          |          |
|---|------------|----------|---|------|-------|----------|----------|
| 6 | rs2523924  | 30975224 | A | 0.14 | -0.86 | 3.36E-01 | 3.22E-01 |
| 6 | rs1632854  | 30975649 | T | 0.41 | 0.60  | 3.51E-01 | 3.63E-01 |
| 6 | rs28360974 | 30976219 | A | 0.05 | -1.85 | 1.76E-01 | 1.78E-01 |
| 6 | rs1634721  | 30977680 | A | 0.11 | 1.66  | 1.00E-01 | 1.05E-01 |
| 6 | rs2530716  | 30978196 | G | 0.14 | -0.86 | 3.36E-01 | 3.22E-01 |
| 6 | rs12203410 | 30978746 | A | 0.15 | -0.17 | 8.47E-01 | 8.80E-01 |
| 6 | rs1634723  | 30979156 | C | 0.23 | -0.11 | 8.85E-01 | 9.11E-01 |
| 6 | rs3869095  | 30980015 | T | 0.10 | 0.86  | 4.13E-01 | 3.87E-01 |
| 6 | rs6913305  | 30981307 | T | 0.39 | -0.57 | 3.75E-01 | 3.37E-01 |
| 6 | rs9391701  | 30983263 | A | 0.16 | -1.05 | 2.23E-01 | 1.89E-01 |
| 6 | rs1619376  | 30983326 | T | 0.21 | -0.54 | 4.79E-01 | 5.01E-01 |
| 6 | rs3871466  | 30983683 | G | 0.16 | -1.05 | 2.23E-01 | 1.89E-01 |
| 6 | rs6910700  | 30985957 | G | 0.39 | -0.57 | 3.75E-01 | 3.37E-01 |
| 6 | rs9262495  | 30986527 | C | 0.13 | -0.63 | 4.97E-01 | 4.65E-01 |
| 6 | rs4713412  | 30987211 | G | 0.39 | -0.57 | 3.75E-01 | 3.37E-01 |
| 6 | rs7758976  | 30987786 | G | 0.47 | -1.06 | 9.04E-02 | 8.20E-02 |
| 6 | rs9262528  | 30989770 | A | 0.13 | -0.63 | 4.97E-01 | 4.65E-01 |
| 6 | rs6903912  | 30991559 | A | 0.23 | 0.03  | 9.71E-01 | 9.76E-01 |
| 6 | rs12198448 | 30992346 | C | 0.11 | 0.84  | 3.94E-01 | 4.03E-01 |
| 6 | rs2523898  | 30993533 | T | 0.47 | 0.11  | 8.59E-01 | 8.35E-01 |
| 6 | rs4713420  | 30993567 | T | 0.18 | 0.00  | 9.96E-01 | 9.81E-01 |
| 6 | rs12179536 | 30993590 | G | 0.18 | 0.83  | 3.28E-01 | 3.03E-01 |
| 6 | rs2523897  | 30993958 | T | 0.16 | -0.11 | 8.96E-01 | 9.49E-01 |
| 6 | rs12665700 | 30996132 | T | 0.10 | 0.81  | 4.46E-01 | 4.35E-01 |
| 6 | rs6457301  | 30998879 | C | 0.33 | 0.45  | 5.02E-01 | 4.60E-01 |
| 6 | rs10947121 | 30999997 | C | 0.35 | 0.54  | 4.16E-01 | 3.81E-01 |
| 6 | rs13210132 | 31001143 | G | 0.05 | -1.48 | 2.99E-01 | 2.58E-01 |
| 6 | rs9468862  | 31001355 | A | 0.01 | 2.36  | 5.14E-01 | 5.01E-01 |
| 6 | rs6933349  | 31002013 | A | 0.21 | 0.24  | 7.60E-01 | 7.24E-01 |
| 6 | rs28732082 | 31004521 | A | 0.06 | -1.74 | 1.93E-01 | 1.65E-01 |
| 6 | rs2844670  | 31005726 | C | 0.15 | -0.50 | 5.74E-01 | 6.15E-01 |
| 6 | rs2844665  | 31006855 | A | 0.36 | -0.10 | 8.77E-01 | 9.65E-01 |
| 6 | rs12201301 | 31007557 | A | 0.04 | -0.54 | 7.21E-01 | 7.35E-01 |
| 6 | rs2517552  | 31007590 | G | 0.35 | 0.00  | 9.98E-01 | 9.09E-01 |

|   |            |          |   |      |       |          |          |
|---|------------|----------|---|------|-------|----------|----------|
| 6 | rs2517549  | 31008598 | T | 0.37 | 0.17  | 7.89E-01 | 8.58E-01 |
| 6 | rs9262560  | 31008626 | T | 0.04 | -0.85 | 6.01E-01 | 5.95E-01 |
| 6 | rs2508015  | 31010200 | T | 0.41 | 0.01  | 9.86E-01 | 9.42E-01 |
| 6 | rs2844647  | 31011013 | T | 0.49 | -0.35 | 5.69E-01 | 4.81E-01 |
| 6 | rs2248386  | 31011247 | T | 0.49 | -0.35 | 5.69E-01 | 4.81E-01 |
| 6 | rs10947129 | 31011662 | A | 0.15 | 0.89  | 3.10E-01 | 2.89E-01 |
| 6 | rs12528584 | 31011845 | T | 0.15 | 0.89  | 3.10E-01 | 2.89E-01 |
| 6 | rs7756294  | 31012356 | A | 0.05 | -1.26 | 4.15E-01 | 3.93E-01 |
| 6 | rs2523872  | 31012730 | A | 0.35 | 0.00  | 9.98E-01 | 9.09E-01 |
| 6 | rs17190106 | 31013351 | A | 0.07 | 0.27  | 8.26E-01 | 7.50E-01 |
| 6 | rs2523870  | 31014116 | G | 0.36 | -0.07 | 9.19E-01 | 9.88E-01 |
| 6 | rs9262582  | 31014305 | A | 0.13 | -1.11 | 2.51E-01 | 2.18E-01 |
| 6 | rs9394032  | 31016230 | T | 0.11 | 1.43  | 1.64E-01 | 1.53E-01 |
| 6 | rs2251830  | 31016978 | A | 0.48 | -0.17 | 7.81E-01 | 7.17E-01 |
| 6 | rs2517532  | 31018407 | T | 0.41 | -0.36 | 5.61E-01 | 6.08E-01 |
| 6 | rs2523864  | 31018546 | A | 0.48 | -0.19 | 7.56E-01 | 6.87E-01 |
| 6 | rs9295947  | 31019460 | A | 0.11 | 1.50  | 1.45E-01 | 1.34E-01 |
| 6 | rs9262632  | 31024808 | G | 0.05 | -0.56 | 6.96E-01 | 7.06E-01 |
| 6 | rs2523849  | 31025051 | G | 0.14 | 0.06  | 9.44E-01 | 9.82E-01 |
| 6 | rs2523848  | 31025104 | T | 0.14 | 0.06  | 9.44E-01 | 9.82E-01 |
| 6 | rs9262633  | 31025265 | G | 0.25 | 0.11  | 8.82E-01 | 8.97E-01 |
| 6 | rs9262638  | 31025989 | T | 0.25 | 0.14  | 8.48E-01 | 8.61E-01 |
| 6 | rs9262639  | 31026009 | T | 0.25 | 0.11  | 8.82E-01 | 8.97E-01 |
| 6 | rs2428514  | 31027516 | T | 0.10 | 0.69  | 4.92E-01 | 5.09E-01 |
| 6 | rs2517518  | 31028345 | A | 0.14 | 0.09  | 9.16E-01 | 9.70E-01 |
| 6 | rs9262648  | 31029173 | A | 0.25 | 0.11  | 8.82E-01 | 8.97E-01 |
| 6 | rs9262651  | 31029455 | T | 0.26 | 0.29  | 6.87E-01 | 6.93E-01 |
| 6 | rs2517511  | 31029918 | G | 0.40 | 0.09  | 8.85E-01 | 9.19E-01 |
| 6 | rs2523840  | 31030425 | T | 0.14 | 0.09  | 9.16E-01 | 9.70E-01 |
| 6 | rs2256436  | 31031381 | C | 0.39 | 0.11  | 8.60E-01 | 8.98E-01 |
| 6 | rs2517506  | 31031680 | G | 0.14 | 0.06  | 9.44E-01 | 9.82E-01 |
| 6 | rs2394423  | 31032042 | T | 0.25 | 0.11  | 8.82E-01 | 8.97E-01 |
| 6 | rs2517504  | 31032370 | C | 0.40 | 0.12  | 8.47E-01 | 8.80E-01 |
| 6 | rs9262656  | 31034264 | G | 0.25 | 0.11  | 8.82E-01 | 8.97E-01 |

|   |            |          |   |      |       |          |          |
|---|------------|----------|---|------|-------|----------|----------|
| 6 | rs2517497  | 31036783 | C | 0.40 | 0.09  | 8.85E-01 | 9.19E-01 |
| 6 | rs2517491  | 31038338 | G | 0.01 | 0.95  | 7.16E-01 | 8.56E-01 |
| 6 | rs2517490  | 31038756 | A | 0.01 | 0.89  | 7.35E-01 | 8.74E-01 |
| 6 | rs2523889  | 31040298 | C | 0.40 | 0.10  | 8.69E-01 | 9.05E-01 |
| 6 | rs2523887  | 31040725 | C | 0.21 | 1.06  | 1.67E-01 | 1.57E-01 |
| 6 | rs2523884  | 31041155 | A | 0.39 | 0.11  | 8.60E-01 | 8.98E-01 |
| 6 | rs2517489  | 31042306 | T | 0.39 | 0.11  | 8.60E-01 | 8.98E-01 |
| 6 | rs2523881  | 31042608 | C | 0.39 | 0.11  | 8.60E-01 | 8.98E-01 |
| 6 | rs2517478  | 31044802 | A | 0.39 | 0.11  | 8.60E-01 | 8.98E-01 |
| 6 | rs2517477  | 31044863 | T | 0.39 | 0.11  | 8.60E-01 | 8.98E-01 |
| 6 | rs2523836  | 31047145 | A | 0.39 | 0.11  | 8.60E-01 | 8.98E-01 |
| 6 | rs17190351 | 31047448 | A | 0.02 | 2.01  | 4.31E-01 | 4.30E-01 |
| 6 | rs2523895  | 31047471 | G | 0.40 | 0.09  | 8.85E-01 | 9.19E-01 |
| 6 | rs2106067  | 31048263 | G | 0.39 | 0.11  | 8.62E-01 | 9.01E-01 |
| 6 | rs6941772  | 31048916 | G | 0.40 | 0.09  | 8.85E-01 | 9.19E-01 |
| 6 | rs9380215  | 31049655 | A | 0.07 | 0.08  | 9.46E-01 | 8.28E-01 |
| 6 | rs9263473  | 31050179 | G | 0.40 | 0.09  | 8.85E-01 | 9.19E-01 |
| 6 | rs2535318  | 31051388 | A | 0.40 | 0.09  | 8.85E-01 | 9.19E-01 |
| 6 | rs2535315  | 31052127 | A | 0.39 | 0.11  | 8.60E-01 | 8.98E-01 |
| 6 | rs2535311  | 31052684 | C | 0.39 | 0.10  | 8.76E-01 | 9.15E-01 |
| 6 | rs2535310  | 31053257 | T | 0.49 | -0.62 | 3.23E-01 | 3.60E-01 |
| 6 | rs3130955  | 31054511 | A | 0.38 | -0.59 | 3.72E-01 | 3.82E-01 |
| 6 | rs2535304  | 31054687 | G | 0.40 | 0.10  | 8.79E-01 | 9.06E-01 |
| 6 | rs2535303  | 31055423 | C | 0.49 | -0.51 | 4.08E-01 | 4.43E-01 |
| 6 | rs4947296  | 31058178 | C | 0.07 | 0.03  | 9.80E-01 | 8.60E-01 |
| 6 | rs3130544  | 31058340 | A | 0.11 | 1.37  | 1.76E-01 | 1.88E-01 |
| 6 | rs2517452  | 31060162 | A | 0.49 | -0.50 | 4.24E-01 | 4.63E-01 |
| 6 | rs2517450  | 31061439 | G | 0.49 | -0.51 | 4.08E-01 | 4.43E-01 |
| 6 | rs2517448  | 31062667 | A | 0.37 | 0.18  | 7.88E-01 | 7.07E-01 |
| 6 | rs2535289  | 31063233 | C | 0.50 | -0.49 | 4.18E-01 | 4.44E-01 |
| 6 | rs2256962  | 31065620 | T | 0.07 | 0.15  | 8.99E-01 | 9.04E-01 |
| 6 | rs2517403  | 31067009 | G | 0.28 | 1.31  | 6.21E-02 | 7.11E-02 |
| 6 | rs9263582  | 31070664 | A | 0.12 | -1.57 | 1.34E-01 | 1.25E-01 |
| 6 | rs2508011  | 31071058 | G | 0.28 | 1.29  | 6.54E-02 | 7.43E-02 |

|   |            |          |   |      |       |          |          |
|---|------------|----------|---|------|-------|----------|----------|
| 6 | rs9263607  | 31072157 | A | 0.15 | -1.09 | 2.16E-01 | 1.71E-01 |
| 6 | rs6457327  | 31074030 | A | 0.37 | 0.19  | 7.64E-01 | 6.85E-01 |
| 6 | rs2517485  | 31074101 | A | 0.29 | 1.46  | 3.53E-02 | 4.28E-02 |
| 6 | rs1064191  | 31075375 | A | 0.49 | -0.49 | 4.26E-01 | 4.61E-01 |
| 6 | rs2844635  | 31075481 | C | 0.28 | 1.31  | 6.21E-02 | 7.11E-02 |
| 6 | rs9391709  | 31077405 | C | 0.07 | -0.03 | 9.83E-01 | 8.78E-01 |
| 6 | rs1265062  | 31078005 | A | 0.28 | 1.31  | 6.21E-02 | 7.11E-02 |
| 6 | rs2233984  | 31079264 | A | 0.07 | -0.03 | 9.83E-01 | 8.78E-01 |
| 6 | rs4495304  | 31080718 | C | 0.07 | 0.06  | 9.62E-01 | 8.48E-01 |
| 6 | rs2233967  | 31080828 | C | 0.21 | -0.43 | 5.78E-01 | 5.96E-01 |
| 6 | rs2233965  | 31080899 | C | 0.21 | -0.49 | 5.26E-01 | 5.42E-01 |
| 6 | rs2233956  | 31081205 | G | 0.17 | 0.67  | 4.34E-01 | 4.83E-01 |
| 6 | rs1265048  | 31081409 | G | 0.32 | 0.37  | 5.82E-01 | 5.19E-01 |
| 6 | rs3130977  | 31081989 | C | 0.34 | 0.33  | 6.19E-01 | 7.10E-01 |
| 6 | rs17190526 | 31082081 | A | 0.16 | -1.47 | 9.24E-02 | 7.57E-02 |
| 6 | rs6917517  | 31082361 | T | 0.15 | 0.23  | 7.97E-01 | 6.92E-01 |
| 6 | rs3130981  | 31083813 | T | 0.23 | 0.62  | 4.22E-01 | 3.95E-01 |
| 6 | rs1042127  | 31084170 | G | 0.16 | 0.50  | 5.61E-01 | 4.64E-01 |
| 6 | rs1062470  | 31084435 | T | 0.34 | -0.74 | 2.71E-01 | 2.58E-01 |
| 6 | rs3094212  | 31085770 | T | 0.50 | -0.40 | 5.35E-01 | 5.77E-01 |
| 6 | rs3130989  | 31086377 | G | 0.44 | 0.24  | 7.04E-01 | 7.12E-01 |
| 6 | rs3094211  | 31086402 | C | 0.23 | 0.61  | 4.24E-01 | 3.96E-01 |
| 6 | rs3095320  | 31087934 | C | 0.23 | 0.61  | 4.25E-01 | 3.97E-01 |
| 6 | rs3095317  | 31088671 | C | 0.44 | 0.24  | 7.04E-01 | 7.12E-01 |
| 6 | rs3095314  | 31089631 | A | 0.44 | 0.24  | 7.04E-01 | 7.12E-01 |
| 6 | rs3094205  | 31091862 | C | 0.34 | -0.77 | 2.51E-01 | 2.38E-01 |
| 6 | rs3094204  | 31091992 | T | 0.43 | 1.32  | 4.21E-02 | 3.51E-02 |
| 6 | rs3778638  | 31092124 | A | 0.23 | -0.78 | 2.90E-01 | 2.68E-01 |
| 6 | rs3131003  | 31093482 | A | 0.41 | -0.50 | 4.38E-01 | 4.33E-01 |
| 6 | rs3815087  | 31093587 | T | 0.20 | -0.78 | 3.30E-01 | 3.23E-01 |
| 6 | rs6931921  | 31095003 | C | 0.11 | -1.57 | 1.15E-01 | 1.03E-01 |
| 6 | rs9263715  | 31095801 | A | 0.20 | -0.93 | 2.49E-01 | 2.38E-01 |
| 6 | rs3909109  | 31096367 | C | 0.19 | -0.78 | 3.46E-01 | 3.37E-01 |
| 6 | rs3130559  | 31097301 | T | 0.21 | 0.33  | 6.72E-01 | 6.95E-01 |

|   |            |          |   |      |       |          |          |
|---|------------|----------|---|------|-------|----------|----------|
| 6 | rs3131009  | 31098832 | G | 0.25 | 0.86  | 2.40E-01 | 2.12E-01 |
| 6 | rs4959053  | 31099577 | A | 0.07 | 0.01  | 9.91E-01 | 8.76E-01 |
| 6 | rs3823418  | 31100942 | A | 0.18 | -1.37 | 9.53E-02 | 8.82E-02 |
| 6 | rs3130564  | 31101674 | T | 0.24 | 0.03  | 9.67E-01 | 9.72E-01 |
| 6 | rs28732100 | 31104593 | T | 0.05 | -1.46 | 3.12E-01 | 2.72E-01 |
| 6 | rs1265099  | 31105413 | C | 0.39 | 0.76  | 2.31E-01 | 2.41E-01 |
| 6 | rs2074478  | 31105633 | G | 0.17 | -0.93 | 2.61E-01 | 2.81E-01 |
| 6 | rs2233952  | 31105891 | T | 0.10 | 0.14  | 8.94E-01 | 8.40E-01 |
| 6 | rs1265098  | 31106177 | G | 0.23 | 1.23  | 1.02E-01 | 8.26E-02 |
| 6 | rs3130573  | 31106268 | G | 0.33 | 1.00  | 1.35E-01 | 1.44E-01 |
| 6 | rs9263726  | 31106499 | A | 0.16 | 0.55  | 5.17E-01 | 5.67E-01 |
| 6 | rs3094663  | 31107087 | A | 0.28 | 0.74  | 2.88E-01 | 2.38E-01 |
| 6 | rs1265093  | 31107187 | T | 0.31 | -1.17 | 8.52E-02 | 9.22E-02 |
| 6 | rs1966     | 31107733 | A | 0.19 | -0.95 | 2.42E-01 | 2.81E-01 |
| 6 | rs9263733  | 31108829 | T | 0.02 | 0.45  | 8.33E-01 | 8.31E-01 |
| 6 | rs1265086  | 31109882 | C | 0.46 | 0.02  | 9.73E-01 | 8.33E-01 |
| 6 | rs12364    | 31110786 | T | 0.21 | 0.15  | 8.43E-01 | 8.97E-01 |
| 6 | rs1265083  | 31111347 | A | 0.01 | 0.89  | 7.35E-01 | 8.74E-01 |
| 6 | rs9263739  | 31111356 | T | 0.21 | 0.18  | 8.18E-01 | 8.61E-01 |
| 6 | rs9263740  | 31111400 | C | 0.24 | -0.46 | 5.28E-01 | 4.83E-01 |
| 6 | rs11967883 | 31112354 | T | 0.03 | -3.89 | 2.84E-02 | 2.58E-02 |
| 6 | rs130072   | 31112484 | A | 0.05 | 2.17  | 1.23E-01 | 1.27E-01 |
| 6 | rs1265074  | 31113214 | T | 0.19 | -1.00 | 2.15E-01 | 2.52E-01 |
| 6 | rs17196989 | 31113703 | G | 0.01 | -0.51 | 8.72E-01 | 9.68E-01 |
| 6 | rs3132538  | 31113842 | T | 0.19 | 0.76  | 3.42E-01 | 2.92E-01 |
| 6 | rs746647   | 31114182 | C | 0.29 | 0.43  | 5.38E-01 | 6.26E-01 |
| 6 | rs9263749  | 31114515 | A | 0.21 | 0.23  | 7.68E-01 | 8.14E-01 |
| 6 | rs2240064  | 31114573 | C | 0.48 | 0.71  | 2.57E-01 | 2.34E-01 |
| 6 | rs1265067  | 31116142 | T | 0.29 | 0.43  | 5.38E-01 | 6.26E-01 |
| 6 | rs1265115  | 31117075 | T | 0.32 | -1.66 | 1.34E-02 | 1.52E-02 |
| 6 | rs1265112  | 31118019 | G | 0.29 | 0.43  | 5.38E-01 | 6.26E-01 |
| 6 | rs130067   | 31118511 | C | 0.19 | -1.00 | 2.15E-01 | 2.50E-01 |
| 6 | rs130078   | 31118565 | G | 0.24 | 1.24  | 9.08E-02 | 7.60E-02 |
| 6 | rs2517985  | 31118942 | G | 0.29 | 0.43  | 5.38E-01 | 6.26E-01 |

|   |            |          |   |      |       |          |          |
|---|------------|----------|---|------|-------|----------|----------|
| 6 | rs1265110  | 31119422 | A | 0.12 | -0.66 | 4.97E-01 | 5.02E-01 |
| 6 | rs1265109  | 31119589 | A | 0.27 | -1.62 | 2.29E-02 | 2.85E-02 |
| 6 | rs2240059  | 31120614 | G | 0.24 | 1.34  | 7.07E-02 | 5.94E-02 |
| 6 | rs130077   | 31122330 | T | 0.20 | -0.05 | 9.50E-01 | 9.24E-01 |
| 6 | rs9263781  | 31123416 | C | 0.20 | -0.05 | 9.50E-01 | 9.24E-01 |
| 6 | rs3130453  | 31124849 | T | 0.48 | -0.98 | 1.28E-01 | 1.23E-01 |
| 6 | rs743401   | 31125158 | G | 0.44 | 1.02  | 1.11E-01 | 1.01E-01 |
| 6 | rs2239524  | 31125569 | T | 0.44 | 1.02  | 1.11E-01 | 1.01E-01 |
| 6 | rs720465   | 31125777 | T | 0.31 | -0.59 | 4.02E-01 | 3.67E-01 |
| 6 | rs3130455  | 31125978 | T | 0.23 | -0.19 | 8.00E-01 | 7.41E-01 |
| 6 | rs17197101 | 31126409 | T | 0.05 | 2.28  | 1.02E-01 | 1.06E-01 |
| 6 | rs3094187  | 31126944 | G | 0.49 | 1.47  | 2.15E-02 | 1.97E-02 |
| 6 | rs6905862  | 31127602 | A | 0.43 | -0.81 | 2.11E-01 | 1.98E-01 |
| 6 | rs7750641  | 31129310 | T | 0.11 | 1.15  | 2.57E-01 | 2.72E-01 |
| 6 | rs2073724  | 31129707 | T | 0.05 | 1.99  | 1.56E-01 | 1.62E-01 |
| 6 | rs9263794  | 31130019 | G | 0.20 | -0.05 | 9.50E-01 | 9.24E-01 |
| 6 | rs1419881  | 31130593 | T | 0.46 | -1.29 | 4.34E-02 | 3.81E-02 |
| 6 | rs1841     | 31130760 | C | 0.07 | -1.20 | 3.44E-01 | 4.18E-01 |
| 6 | rs17190776 | 31130865 | A | 0.05 | 1.98  | 1.60E-01 | 1.65E-01 |
| 6 | rs3130933  | 31132085 | A | 0.11 | -0.02 | 9.86E-01 | 9.65E-01 |
| 6 | rs9263796  | 31132883 | T | 0.20 | -0.05 | 9.50E-01 | 9.24E-01 |
| 6 | rs9501063  | 31133894 | C | 0.04 | -2.87 | 8.58E-02 | 7.17E-02 |
| 6 | rs3130932  | 31133943 | G | 0.29 | 1.78  | 1.05E-02 | 8.66E-03 |
| 6 | rs9263800  | 31134599 | A | 0.20 | -0.05 | 9.50E-01 | 9.24E-01 |
| 6 | rs3130931  | 31134888 | A | 0.29 | 0.97  | 1.62E-01 | 1.49E-01 |
| 6 | rs9263805  | 31135735 | A | 0.24 | 1.32  | 7.08E-02 | 5.70E-02 |
| 6 | rs3130501  | 31136453 | A | 0.23 | 1.40  | 5.72E-02 | 4.66E-02 |
| 6 | rs3130503  | 31137165 | A | 0.19 | 0.70  | 3.83E-01 | 3.40E-01 |
| 6 | rs879882   | 31139452 | T | 0.35 | 0.99  | 1.35E-01 | 1.19E-01 |
| 6 | rs1108746  | 31139504 | A | 0.10 | 2.68  | 1.07E-02 | 9.71E-03 |
| 6 | rs1265159  | 31140047 | T | 0.23 | -0.37 | 6.25E-01 | 5.47E-01 |
| 6 | rs3132517  | 31141836 | G | 0.19 | 0.79  | 3.29E-01 | 2.83E-01 |
| 6 | rs3094188  | 31142245 | G | 0.33 | 1.06  | 1.10E-01 | 7.22E-02 |
| 6 | rs1265156  | 31142297 | T | 0.31 | 0.07  | 9.19E-01 | 8.03E-01 |



|   |            |          |   |      |       |          |          |
|---|------------|----------|---|------|-------|----------|----------|
| 6 | rs887466   | 31143511 | T | 0.39 | 0.70  | 2.85E-01 | 2.06E-01 |
| 6 | rs9501066  | 31145271 | G | 0.38 | 0.55  | 4.00E-01 | 3.03E-01 |
| 6 | rs3868542  | 31145839 | G | 0.38 | 0.55  | 4.00E-01 | 3.03E-01 |
| 6 | rs887464   | 31145920 | A | 0.41 | 0.16  | 8.01E-01 | 7.13E-01 |
| 6 | rs4713438  | 31146846 | A | 0.18 | 1.09  | 1.86E-01 | 1.43E-01 |
| 6 | rs9263823  | 31147094 | T | 0.13 | -0.88 | 3.47E-01 | 3.09E-01 |
| 6 | rs3130457  | 31147194 | C | 0.23 | -0.40 | 6.02E-01 | 5.21E-01 |
| 6 | rs6937752  | 31148606 | T | 0.37 | 0.56  | 3.95E-01 | 2.94E-01 |
| 6 | rs9263827  | 31149045 | T | 0.04 | 1.31  | 4.22E-01 | 4.25E-01 |
| 6 | rs7760698  | 31150225 | A | 0.05 | -1.03 | 5.06E-01 | 5.15E-01 |
| 6 | rs1128175  | 31150435 | T | 0.18 | 0.49  | 5.50E-01 | 5.23E-01 |
| 6 | rs9263844  | 31155186 | T | 0.12 | 0.70  | 4.74E-01 | 4.56E-01 |
| 6 | rs9263846  | 31155670 | A | 0.12 | 0.60  | 5.44E-01 | 5.25E-01 |
| 6 | rs1265181  | 31155785 | G | 0.21 | -0.28 | 7.23E-01 | 6.75E-01 |
| 6 | rs9405015  | 31155803 | T | 0.01 | -3.67 | 1.64E-01 | 1.81E-01 |
| 6 | rs9295957  | 31157593 | A | 0.17 | 0.04  | 9.65E-01 | 9.10E-01 |
| 6 | rs1265180  | 31159345 | T | 0.02 | -1.35 | 5.75E-01 | 4.53E-01 |
| 6 | rs9461653  | 31160553 | G | 0.07 | -1.27 | 3.14E-01 | 3.78E-01 |
| 6 | rs28362332 | 31162154 | A | 0.08 | 1.53  | 2.07E-01 | 2.13E-01 |
| 6 | rs4713446  | 31162839 | T | 0.36 | -0.10 | 8.79E-01 | 9.78E-01 |
| 6 | rs4713447  | 31162963 | G | 0.36 | -0.09 | 8.89E-01 | 9.90E-01 |
| 6 | rs28362343 | 31165527 | A | 0.08 | 1.51  | 2.15E-01 | 2.20E-01 |
| 6 | rs3094609  | 31165566 | A | 0.13 | -0.08 | 9.28E-01 | 9.77E-01 |
| 6 | rs9295961  | 31167498 | C | 0.07 | -1.27 | 3.14E-01 | 3.78E-01 |
| 6 | rs28397286 | 31167573 | A | 0.18 | 0.00  | 1.00E+00 | 9.42E-01 |
| 6 | rs3868075  | 31167815 | C | 0.36 | -0.09 | 8.91E-01 | 9.91E-01 |
| 6 | rs4122190  | 31167852 | C | 0.01 | -3.67 | 1.64E-01 | 1.81E-01 |
| 6 | rs4122189  | 31167927 | A | 0.22 | -0.22 | 7.75E-01 | 8.39E-01 |
| 6 | rs6903896  | 31168029 | A | 0.04 | -2.46 | 1.43E-01 | 1.12E-01 |
| 6 | rs10807081 | 31169764 | T | 0.10 | -0.11 | 9.20E-01 | 9.44E-01 |
| 6 | rs9263870  | 31170514 | G | 0.08 | 1.69  | 1.64E-01 | 1.65E-01 |
| 6 | rs9263871  | 31170528 | G | 0.30 | 0.31  | 6.55E-01 | 6.01E-01 |
| 6 | rs9263873  | 31170713 | C | 0.36 | -0.06 | 9.32E-01 | 9.66E-01 |
| 6 | rs3132510  | 31172151 | G | 0.10 | 1.37  | 2.02E-01 | 2.00E-01 |

|   |            |          |   |      |       |          |          |
|---|------------|----------|---|------|-------|----------|----------|
| 6 | rs4446605  | 31173096 | G | 0.08 | 1.69  | 1.64E-01 | 1.65E-01 |
| 6 | rs2894181  | 31174527 | G | 0.48 | -0.22 | 7.22E-01 | 7.80E-01 |
| 6 | rs9263911  | 31175667 | G | 0.44 | -0.02 | 9.77E-01 | 9.78E-01 |
| 6 | rs4351302  | 31176921 | A | 0.24 | -1.14 | 1.20E-01 | 1.32E-01 |
| 6 | rs9263916  | 31176928 | C | 0.08 | 1.71  | 1.58E-01 | 1.61E-01 |
| 6 | rs35718543 | 31177845 | A | 0.10 | 3.75  | 4.34E-04 | 2.65E-04 |
| 6 | rs34282959 | 31180531 | C | 0.26 | 1.93  | 7.86E-03 | 5.70E-03 |
| 6 | rs9263948  | 31181025 | T | 0.08 | 1.71  | 1.58E-01 | 1.61E-01 |
| 6 | rs9468898  | 31182383 | G | 0.04 | -2.36 | 1.61E-01 | 1.29E-01 |
| 6 | rs28360990 | 31182479 | A | 0.18 | -0.93 | 2.61E-01 | 2.54E-01 |
| 6 | rs11757688 | 31182536 | G | 0.26 | 1.92  | 8.16E-03 | 5.93E-03 |
| 6 | rs9295967  | 31184020 | G | 0.24 | -1.13 | 1.23E-01 | 1.35E-01 |
| 6 | rs3869109  | 31184196 | T | 0.42 | -1.14 | 7.81E-02 | 5.78E-02 |
| 6 | rs9501522  | 31184425 | A | 0.06 | -1.25 | 3.30E-01 | 3.88E-01 |
| 6 | rs3130467  | 31187075 | T | 0.30 | -1.21 | 8.32E-02 | 5.58E-02 |
| 6 | rs10456394 | 31188200 | C | 0.18 | -0.94 | 2.53E-01 | 2.53E-01 |
| 6 | rs28360997 | 31188654 | A | 0.21 | -0.28 | 7.15E-01 | 7.02E-01 |
| 6 | rs9263985  | 31190538 | A | 0.36 | 0.52  | 4.33E-01 | 3.94E-01 |
| 6 | rs4373355  | 31193155 | C | 0.37 | 0.40  | 5.51E-01 | 5.10E-01 |
| 6 | rs6928399  | 31195218 | T | 0.29 | 0.41  | 5.57E-01 | 4.92E-01 |
| 6 | rs28397289 | 31197407 | T | 0.19 | 0.46  | 5.73E-01 | 5.42E-01 |
| 6 | rs3130473  | 31199208 | T | 0.27 | -0.83 | 2.49E-01 | 2.06E-01 |
| 6 | rs3130528  | 31199460 | T | 0.12 | -0.22 | 8.16E-01 | 8.55E-01 |
| 6 | rs7745906  | 31204008 | A | 0.16 | 0.35  | 6.81E-01 | 6.35E-01 |
| 6 | rs3130685  | 31206206 | T | 0.41 | -0.46 | 4.72E-01 | 4.07E-01 |
| 6 | rs3130531  | 31206616 | A | 0.39 | -0.41 | 5.14E-01 | 5.76E-01 |
| 6 | rs3095250  | 31208340 | G | 0.37 | 0.78  | 2.34E-01 | 2.04E-01 |
| 6 | rs3130532  | 31208453 | A | 0.12 | -0.22 | 8.13E-01 | 8.53E-01 |
| 6 | rs3130534  | 31209045 | G | 0.39 | 0.57  | 3.78E-01 | 3.46E-01 |
| 6 | rs3130712  | 31209510 | C | 0.37 | 0.96  | 1.45E-01 | 1.25E-01 |
| 6 | rs3130688  | 31210216 | C | 0.36 | 0.81  | 2.18E-01 | 1.85E-01 |
| 6 | rs6901869  | 31210265 | A | 0.17 | -0.94 | 2.67E-01 | 2.75E-01 |
| 6 | rs9468907  | 31215097 | T | 0.01 | -1.19 | 6.62E-01 | 6.17E-01 |
| 6 | rs3095241  | 31215635 | T | 0.36 | 0.89  | 1.83E-01 | 1.55E-01 |

|   |            |          |   |      |       |          |          |
|---|------------|----------|---|------|-------|----------|----------|
| 6 | rs9357117  | 31217504 | G | 0.01 | -4.31 | 1.31E-01 | 1.44E-01 |
| 6 | rs3130424  | 31218239 | C | 0.25 | -0.75 | 3.06E-01 | 2.58E-01 |
| 6 | rs4084090  | 31218835 | C | 0.08 | -0.15 | 8.99E-01 | 8.55E-01 |
| 6 | rs4084262  | 31218889 | A | 0.11 | 0.12  | 9.05E-01 | 8.74E-01 |
| 6 | rs3130427  | 31218984 | A | 0.40 | 0.74  | 2.52E-01 | 2.29E-01 |
| 6 | rs9264179  | 31219869 | T | 0.39 | 0.81  | 2.05E-01 | 1.91E-01 |
| 6 | rs4416711  | 31221039 | T | 0.08 | -0.18 | 8.77E-01 | 8.69E-01 |
| 6 | rs17191559 | 31221485 | C | 0.08 | -1.98 | 9.08E-02 | 1.12E-01 |
| 6 | rs9264219  | 31221914 | C | 0.28 | 0.58  | 3.99E-01 | 3.82E-01 |
| 6 | rs1986997  | 31228410 | T | 0.36 | -0.37 | 5.65E-01 | 5.37E-01 |
| 6 | rs2394950  | 31230701 | A | 0.05 | 1.15  | 4.35E-01 | 4.35E-01 |
| 6 | rs3130542  | 31232111 | A | 0.19 | 0.24  | 7.61E-01 | 7.23E-01 |
| 6 | rs2844623  | 31232543 | A | 0.23 | 0.32  | 6.72E-01 | 7.36E-01 |
| 6 | rs2248902  | 31234114 | A | 0.27 | -0.44 | 5.54E-01 | 5.41E-01 |
| 6 | rs9264532  | 31234381 | C | 0.31 | 0.25  | 7.10E-01 | 6.17E-01 |
| 6 | rs2524099  | 31236051 | C | 0.48 | -0.11 | 8.59E-01 | 8.67E-01 |
| 6 | rs9394047  | 31236250 | C | 0.07 | -2.00 | 1.24E-01 | 1.30E-01 |
| 6 | rs34131062 | 31236410 | T | 0.14 | 0.67  | 4.67E-01 | 4.33E-01 |
| 6 | rs9264602  | 31237406 | C | 0.30 | 0.59  | 3.85E-01 | 3.65E-01 |
| 6 | rs2074488  | 31240431 | A | 0.14 | 0.59  | 5.24E-01 | 4.94E-01 |
| 6 | rs2395471  | 31240692 | A | 0.38 | -0.02 | 9.76E-01 | 9.93E-01 |
| 6 | rs7759127  | 31240988 | G | 0.17 | -1.29 | 1.20E-01 | 9.22E-02 |
| 6 | rs5010528  | 31241032 | G | 0.07 | 1.83  | 1.51E-01 | 1.56E-01 |
| 6 | rs9461680  | 31243347 | T | 0.19 | 0.15  | 8.52E-01 | 7.96E-01 |
| 6 | rs3130696  | 31243884 | A | 0.23 | 0.39  | 5.90E-01 | 5.84E-01 |
| 6 | rs2524073  | 31244235 | T | 0.18 | -1.21 | 1.43E-01 | 1.12E-01 |
| 6 | rs2524068  | 31245061 | A | 0.23 | -0.04 | 9.61E-01 | 9.11E-01 |
| 6 | rs9391714  | 31245080 | A | 0.02 | -2.85 | 1.71E-01 | 2.00E-01 |
| 6 | rs6906846  | 31245736 | A | 0.25 | 1.62  | 2.67E-02 | 2.39E-02 |
| 6 | rs7382297  | 31247067 | T | 0.12 | -0.23 | 8.03E-01 | 8.38E-01 |
| 6 | rs17198616 | 31247964 | C | 0.13 | 0.74  | 4.27E-01 | 3.91E-01 |
| 6 | rs9468914  | 31250606 | C | 0.30 | 0.79  | 2.45E-01 | 2.28E-01 |
| 6 | rs2394963  | 31251462 | T | 0.26 | 1.13  | 1.17E-01 | 1.15E-01 |
| 6 | rs9348862  | 31252747 | C | 0.07 | -0.08 | 9.48E-01 | 9.96E-01 |

|   |            |          |   |      |       |          |          |
|---|------------|----------|---|------|-------|----------|----------|
| 6 | rs9461684  | 31253444 | T | 0.06 | 1.86  | 1.45E-01 | 1.50E-01 |
| 6 | rs2853933  | 31254088 | A | 0.40 | -0.66 | 3.10E-01 | 3.00E-01 |
| 6 | rs9468920  | 31254936 | A | 0.26 | 1.20  | 9.56E-02 | 9.41E-02 |
| 6 | rs2853930  | 31255424 | G | 0.17 | -1.38 | 9.74E-02 | 7.35E-02 |
| 6 | rs2524050  | 31255541 | G | 0.17 | -1.38 | 9.74E-02 | 7.35E-02 |
| 6 | rs2524044  | 31256753 | C | 0.22 | -1.38 | 6.60E-02 | 5.59E-02 |
| 6 | rs9468924  | 31256948 | A | 0.01 | -1.24 | 6.41E-01 | 5.84E-01 |
| 6 | rs3900938  | 31257622 | G | 0.21 | 1.45  | 6.22E-02 | 6.17E-02 |
| 6 | rs28367594 | 31258141 | A | 0.03 | -0.52 | 7.63E-01 | 7.58E-01 |
| 6 | rs9468925  | 31258837 | A | 0.33 | 1.63  | 1.46E-02 | 1.24E-02 |
| 6 | rs9468926  | 31260218 | T | 0.31 | 1.81  | 7.62E-03 | 6.67E-03 |
| 6 | rs9357122  | 31260345 | C | 0.07 | -0.08 | 9.48E-01 | 9.96E-01 |
| 6 | rs16899178 | 31261137 | T | 0.04 | -1.05 | 4.91E-01 | 5.45E-01 |
| 6 | rs2243868  | 31261276 | A | 0.40 | -0.59 | 3.62E-01 | 3.53E-01 |
| 6 | rs3873379  | 31262169 | G | 0.26 | 1.12  | 1.21E-01 | 1.20E-01 |
| 6 | rs3873380  | 31262438 | A | 0.26 | 1.13  | 1.15E-01 | 1.09E-01 |
| 6 | rs9348863  | 31262461 | C | 0.08 | -0.15 | 8.96E-01 | 9.46E-01 |
| 6 | rs3873381  | 31263231 | G | 0.07 | -0.08 | 9.48E-01 | 9.96E-01 |
| 6 | rs3094682  | 31264461 | T | 0.16 | 1.33  | 1.14E-01 | 9.39E-02 |
| 6 | rs9468932  | 31264823 | A | 0.20 | -2.37 | 3.65E-03 | 3.14E-03 |
| 6 | rs2524132  | 31264912 | T | 0.17 | -1.38 | 9.74E-02 | 7.35E-02 |
| 6 | rs2853924  | 31265146 | A | 0.17 | -1.38 | 9.74E-02 | 7.35E-02 |
| 6 | rs2246954  | 31265262 | A | 0.44 | -0.77 | 2.26E-01 | 2.33E-01 |
| 6 | rs2524123  | 31265314 | G | 0.41 | -1.75 | 6.00E-03 | 3.85E-03 |
| 6 | rs2247056  | 31265490 | T | 0.23 | 0.55  | 4.58E-01 | 4.43E-01 |
| 6 | rs17192463 | 31265565 | T | 0.02 | -0.77 | 7.18E-01 | 7.50E-01 |
| 6 | rs2853923  | 31265737 | C | 0.45 | -0.19 | 7.50E-01 | 6.99E-01 |
| 6 | rs2524089  | 31266522 | C | 0.40 | -0.53 | 4.10E-01 | 3.98E-01 |
| 6 | rs28367646 | 31268332 | C | 0.26 | 1.11  | 1.18E-01 | 1.21E-01 |
| 6 | rs9366778  | 31269173 | A | 0.36 | 0.67  | 3.11E-01 | 2.83E-01 |
| 6 | rs3873385  | 31269308 | A | 0.20 | -1.63 | 3.81E-02 | 2.88E-02 |
| 6 | rs3915971  | 31269348 | C | 0.29 | -0.22 | 7.53E-01 | 7.50E-01 |
| 6 | rs7750269  | 31271157 | G | 0.09 | -0.50 | 6.34E-01 | 7.00E-01 |
| 6 | rs9264868  | 31271601 | G | 0.17 | -1.40 | 9.25E-02 | 6.80E-02 |

|   |            |          |   |      |       |          |          |
|---|------------|----------|---|------|-------|----------|----------|
| 6 | rs9264869  | 31271630 | G | 0.18 | -1.41 | 8.96E-02 | 6.80E-02 |
| 6 | rs9264870  | 31271662 | A | 0.18 | -1.41 | 8.96E-02 | 6.80E-02 |
| 6 | rs9461688  | 31271716 | G | 0.25 | 1.28  | 7.87E-02 | 8.18E-02 |
| 6 | rs9368675  | 31272157 | A | 0.09 | -0.50 | 6.34E-01 | 7.00E-01 |
| 6 | rs6457374  | 31272261 | C | 0.22 | 0.35  | 6.39E-01 | 6.12E-01 |
| 6 | rs9368677  | 31272321 | A | 0.08 | -0.49 | 6.67E-01 | 7.35E-01 |
| 6 | rs9264904  | 31272553 | A | 0.29 | -0.23 | 7.43E-01 | 6.81E-01 |
| 6 | rs9264916  | 31272774 | A | 0.25 | -1.23 | 8.40E-02 | 7.66E-02 |
| 6 | rs7760988  | 31273030 | T | 0.10 | -0.55 | 5.95E-01 | 6.61E-01 |
| 6 | rs7761965  | 31273495 | A | 0.12 | -0.66 | 4.86E-01 | 5.52E-01 |
| 6 | rs3873386  | 31273745 | G | 0.33 | 1.69  | 1.13E-02 | 9.58E-03 |
| 6 | rs6930944  | 31274036 | G | 0.09 | -0.50 | 6.34E-01 | 7.00E-01 |
| 6 | rs9264942  | 31274380 | C | 0.43 | -0.83 | 2.03E-01 | 1.71E-01 |
| 6 | rs10484554 | 31274555 | T | 0.16 | -1.67 | 6.09E-02 | 5.57E-02 |
| 6 | rs396243   | 31275174 | G | 0.26 | -1.15 | 1.09E-01 | 9.81E-02 |
| 6 | rs9378199  | 31301658 | C | 0.08 | -0.58 | 6.09E-01 | 6.77E-01 |
| 6 | rs9265882  | 31313101 | C | 0.41 | -1.82 | 4.64E-03 | 2.84E-03 |
| 6 | rs7453967  | 31314243 | G | 0.13 | -0.24 | 7.96E-01 | 8.49E-01 |
| 6 | rs2246010  | 31317024 | C | 0.05 | 0.28  | 8.39E-01 | 9.12E-01 |
| 6 | rs9266018  | 31317223 | A | 0.12 | -1.12 | 2.65E-01 | 2.68E-01 |
| 6 | rs2156875  | 31317347 | G | 0.48 | -0.43 | 4.97E-01 | 5.44E-01 |
| 6 | rs2523619  | 31318144 | G | 0.22 | -1.37 | 7.42E-02 | 6.13E-02 |
| 6 | rs2442719  | 31320538 | G | 0.39 | 0.00  | 9.99E-01 | 9.66E-01 |
| 6 | rs2596503  | 31320810 | T | 0.17 | 0.87  | 3.05E-01 | 2.93E-01 |
| 6 | rs2523612  | 31321123 | C | 0.12 | -0.03 | 9.75E-01 | 1.00E+00 |
| 6 | rs2596501  | 31321211 | G | 0.48 | 0.76  | 2.24E-01 | 2.04E-01 |
| 6 | rs1058026  | 31321685 | G | 0.13 | 0.35  | 7.18E-01 | 6.83E-01 |
| 6 | rs2523608  | 31322559 | C | 0.41 | -1.27 | 4.63E-02 | 4.33E-02 |
| 6 | rs2596487  | 31325056 | A | 0.18 | -0.67 | 4.29E-01 | 3.42E-01 |
| 6 | rs2523591  | 31326960 | T | 0.42 | 0.93  | 1.39E-01 | 1.13E-01 |
| 6 | rs2523580  | 31328245 | C | 0.36 | -0.30 | 6.44E-01 | 6.90E-01 |
| 6 | rs2596549  | 31331166 | A | 0.17 | -0.68 | 4.21E-01 | 4.47E-01 |
| 6 | rs2523554  | 31331829 | G | 0.37 | 0.86  | 1.84E-01 | 1.82E-01 |
| 6 | rs2596551  | 31332239 | C | 0.22 | -0.71 | 3.60E-01 | 3.45E-01 |

|   |            |          |   |      |       |          |          |
|---|------------|----------|---|------|-------|----------|----------|
| 6 | rs2844575  | 31334945 | A | 0.49 | 0.18  | 7.73E-01 | 7.96E-01 |
| 6 | rs2844573  | 31335454 | G | 0.34 | 1.13  | 9.36E-02 | 9.15E-02 |
| 6 | rs9266395  | 31335566 | T | 0.20 | -0.91 | 2.52E-01 | 2.72E-01 |
| 6 | rs9266399  | 31335806 | T | 0.20 | -0.86 | 2.80E-01 | 3.03E-01 |
| 6 | rs2523535  | 31336250 | C | 0.43 | 0.71  | 2.61E-01 | 2.78E-01 |
| 6 | rs9266409  | 31336568 | C | 0.20 | -0.86 | 2.80E-01 | 3.03E-01 |
| 6 | rs2253907  | 31336870 | G | 0.45 | -0.25 | 6.89E-01 | 6.85E-01 |
| 6 | rs9266433  | 31337633 | T | 0.15 | -0.79 | 3.79E-01 | 3.74E-01 |
| 6 | rs9295986  | 31338528 | T | 0.23 | -0.82 | 2.57E-01 | 2.32E-01 |
| 6 | rs2523522  | 31340328 | A | 0.35 | -0.41 | 5.29E-01 | 5.21E-01 |
| 6 | rs2394990  | 31340559 | C | 0.35 | -0.44 | 4.94E-01 | 4.86E-01 |
| 6 | rs7770216  | 31340611 | T | 0.20 | -0.89 | 2.58E-01 | 2.84E-01 |
| 6 | rs9266515  | 31341340 | C | 0.02 | 0.35  | 8.81E-01 | 9.11E-01 |
| 6 | rs2254556  | 31342631 | A | 0.17 | -0.66 | 4.31E-01 | 4.58E-01 |
| 6 | rs13202464 | 31344583 | G | 0.07 | 2.85  | 2.58E-02 | 1.81E-02 |
| 6 | rs7382258  | 31345021 | G | 0.36 | -0.25 | 7.02E-01 | 7.03E-01 |
| 6 | rs7775117  | 31345486 | A | 0.19 | 0.27  | 7.33E-01 | 7.41E-01 |
| 6 | rs9266629  | 31346822 | C | 0.26 | 0.64  | 3.79E-01 | 3.68E-01 |
| 6 | rs9501587  | 31346937 | A | 0.16 | 0.23  | 7.87E-01 | 8.69E-01 |
| 6 | rs9266638  | 31347057 | T | 0.27 | -0.14 | 8.48E-01 | 8.08E-01 |
| 6 | rs4713460  | 31347798 | A | 0.30 | -0.68 | 3.21E-01 | 3.63E-01 |
| 6 | rs4713462  | 31347816 | A | 0.29 | -0.57 | 4.04E-01 | 4.43E-01 |
| 6 | rs9266689  | 31348580 | A | 0.34 | -0.78 | 2.41E-01 | 2.63E-01 |
| 6 | rs9266722  | 31349922 | T | 0.11 | -0.64 | 5.36E-01 | 5.55E-01 |
| 6 | rs2442749  | 31352040 | G | 0.29 | 0.42  | 5.50E-01 | 6.34E-01 |
| 6 | rs9266773  | 31352348 | C | 0.15 | -0.75 | 4.02E-01 | 3.97E-01 |
| 6 | rs28366099 | 31352902 | T | 0.07 | -0.40 | 7.41E-01 | 7.21E-01 |
| 6 | rs2844529  | 31353593 | T | 0.29 | -0.30 | 6.67E-01 | 5.95E-01 |
| 6 | rs2428486  | 31354104 | G | 0.29 | -0.27 | 6.99E-01 | 6.26E-01 |
| 6 | rs6932730  | 31354182 | C | 0.16 | -1.05 | 2.16E-01 | 1.53E-01 |
| 6 | rs4711268  | 31354504 | T | 0.22 | -0.17 | 8.20E-01 | 7.52E-01 |
| 6 | rs13437082 | 31354560 | T | 0.22 | -0.25 | 7.40E-01 | 6.78E-01 |
| 6 | rs4711269  | 31354819 | T | 0.22 | -0.24 | 7.55E-01 | 6.89E-01 |
| 6 | rs2596560  | 31355318 | G | 0.22 | 0.25  | 7.41E-01 | 7.48E-01 |

|   |            |          |   |      |       |          |          |
|---|------------|----------|---|------|-------|----------|----------|
| 6 | rs2523477  | 31360389 | G | 0.07 | -0.30 | 8.09E-01 | 7.73E-01 |
| 6 | rs7751725  | 31360433 | G | 0.21 | -0.29 | 7.03E-01 | 6.36E-01 |
| 6 | rs2523476  | 31361424 | A | 0.07 | -0.30 | 8.09E-01 | 7.73E-01 |
| 6 | rs2523467  | 31362930 | A | 0.28 | -0.48 | 4.93E-01 | 4.28E-01 |
| 6 | rs2251396  | 31364707 | T | 0.35 | -0.40 | 5.53E-01 | 5.68E-01 |
| 6 | rs2596542  | 31366595 | A | 0.28 | -0.44 | 5.30E-01 | 4.94E-01 |
| 6 | rs2523454  | 31367865 | T | 0.36 | -0.77 | 2.44E-01 | 2.46E-01 |
| 6 | rs2523453  | 31368125 | C | 0.28 | -0.48 | 4.95E-01 | 4.14E-01 |
| 6 | rs2844521  | 31368964 | A | 0.28 | -0.37 | 6.05E-01 | 5.29E-01 |
| 6 | rs2301749  | 31371355 | T | 0.02 | -0.38 | 8.81E-01 | 8.62E-01 |
| 6 | rs2263313  | 31373810 | A | 0.07 | -0.27 | 8.29E-01 | 8.07E-01 |
| 6 | rs12174396 | 31374579 | G | 0.08 | -1.63 | 1.59E-01 | 1.79E-01 |
| 6 | rs12660741 | 31376989 | G | 0.03 | 2.87  | 1.54E-01 | 1.39E-01 |
| 6 | rs6910087  | 31377047 | T | 0.10 | -1.14 | 2.61E-01 | 2.21E-01 |
| 6 | rs9266804  | 31377642 | G | 0.06 | 3.10  | 1.73E-02 | 1.51E-02 |
| 6 | rs1051794  | 31379109 | A | 0.25 | 0.49  | 5.05E-01 | 5.16E-01 |
| 6 | rs1131896  | 31379115 | A | 0.25 | -1.08 | 1.41E-01 | 1.47E-01 |
| 6 | rs2256028  | 31379198 | T | 0.15 | -0.26 | 7.69E-01 | 7.60E-01 |
| 6 | rs2256175  | 31380449 | A | 0.40 | 0.09  | 8.92E-01 | 9.37E-01 |
| 6 | rs28642901 | 31381808 | G | 0.22 | 0.75  | 3.35E-01 | 3.02E-01 |
| 6 | rs9266825  | 31382882 | A | 0.22 | 0.87  | 2.65E-01 | 2.19E-01 |
| 6 | rs1131904  | 31383071 | G | 0.22 | 0.83  | 2.81E-01 | 2.68E-01 |
| 6 | rs6932236  | 31383979 | C | 0.22 | 0.87  | 2.60E-01 | 2.35E-01 |
| 6 | rs2848713  | 31384479 | A | 0.06 | -0.13 | 9.24E-01 | 9.56E-01 |
| 6 | rs9468992  | 31384578 | A | 0.12 | -0.92 | 3.30E-01 | 2.92E-01 |
| 6 | rs9266845  | 31384792 | C | 0.22 | 0.84  | 2.76E-01 | 2.54E-01 |
| 6 | rs2596530  | 31387373 | G | 0.49 | 0.11  | 8.55E-01 | 8.60E-01 |
| 6 | rs2596531  | 31387557 | C | 0.49 | 0.11  | 8.56E-01 | 8.66E-01 |
| 6 | rs9501106  | 31388109 | A | 0.12 | -0.87 | 3.59E-01 | 3.14E-01 |
| 6 | rs2844513  | 31388214 | T | 0.39 | 0.18  | 7.78E-01 | 8.07E-01 |
| 6 | rs2844511  | 31389784 | T | 0.49 | 0.11  | 8.55E-01 | 8.50E-01 |
| 6 | rs17200407 | 31389965 | G | 0.01 | -0.82 | 7.68E-01 | 6.85E-01 |
| 6 | rs10223568 | 31390203 | C | 0.12 | -0.92 | 3.30E-01 | 2.92E-01 |
| 6 | rs2516448  | 31390410 | A | 0.49 | 0.11  | 8.55E-01 | 8.50E-01 |

|   |            |          |   |      |       |          |          |
|---|------------|----------|---|------|-------|----------|----------|
| 6 | rs9501109  | 31392118 | G | 0.20 | -0.44 | 5.72E-01 | 4.80E-01 |
| 6 | rs2524279  | 31392906 | C | 0.07 | -1.10 | 3.81E-01 | 4.40E-01 |
| 6 | rs4947314  | 31393374 | G | 0.14 | -0.37 | 6.74E-01 | 6.30E-01 |
| 6 | rs6935045  | 31402410 | A | 0.12 | 1.58  | 8.59E-02 | 8.12E-02 |
| 6 | rs9501595  | 31405604 | T | 0.12 | -0.92 | 3.30E-01 | 2.92E-01 |
| 6 | rs2524277  | 31407579 | T | 0.04 | 0.41  | 8.04E-01 | 8.15E-01 |
| 6 | rs7772549  | 31407643 | C | 0.26 | 0.32  | 6.56E-01 | 6.88E-01 |
| 6 | rs9469003  | 31407828 | C | 0.12 | -0.92 | 3.30E-01 | 2.92E-01 |
| 6 | rs3094738  | 31407913 | C | 0.06 | -0.24 | 8.51E-01 | 8.39E-01 |
| 6 | rs6938674  | 31408004 | C | 0.02 | 2.70  | 2.19E-01 | 2.15E-01 |
| 6 | rs9469007  | 31409024 | C | 0.27 | 0.19  | 7.89E-01 | 8.28E-01 |
| 6 | rs28575156 | 31409857 | G | 0.12 | -0.97 | 3.03E-01 | 2.65E-01 |
| 6 | rs6928810  | 31410524 | T | 0.24 | 0.50  | 5.02E-01 | 4.89E-01 |
| 6 | rs3899823  | 31410597 | T | 0.18 | -0.34 | 6.86E-01 | 6.38E-01 |
| 6 | rs3869129  | 31410649 | A | 0.18 | -0.34 | 6.86E-01 | 6.38E-01 |
| 6 | rs2596464  | 31412961 | A | 0.46 | 0.55  | 3.84E-01 | 3.70E-01 |
| 6 | rs9765960  | 31413000 | A | 0.02 | 2.70  | 2.19E-01 | 2.15E-01 |
| 6 | rs12206131 | 31414010 | G | 0.04 | -1.23 | 4.63E-01 | 5.04E-01 |
| 6 | rs2516464  | 31416156 | T | 0.48 | 0.35  | 5.76E-01 | 5.32E-01 |
| 6 | rs2516463  | 31416536 | C | 0.07 | 0.13  | 9.19E-01 | 9.36E-01 |
| 6 | rs16899646 | 31416920 | G | 0.11 | -1.24 | 2.28E-01 | 2.04E-01 |
| 6 | rs3128982  | 31417191 | G | 0.34 | 0.07  | 9.17E-01 | 9.40E-01 |
| 6 | rs9501129  | 31417396 | C | 0.12 | -0.77 | 4.30E-01 | 4.04E-01 |
| 6 | rs2596458  | 31417647 | A | 0.07 | 0.13  | 9.19E-01 | 9.36E-01 |
| 6 | rs2516458  | 31419387 | A | 0.48 | 0.35  | 5.76E-01 | 5.32E-01 |
| 6 | rs2516456  | 31420018 | A | 0.48 | 0.37  | 5.51E-01 | 5.09E-01 |
| 6 | rs2516454  | 31420863 | T | 0.07 | 0.13  | 9.19E-01 | 9.36E-01 |
| 6 | rs6919586  | 31421112 | G | 0.11 | -1.27 | 2.16E-01 | 1.92E-01 |
| 6 | rs3093971  | 31424607 | T | 0.11 | -1.43 | 1.61E-01 | 1.70E-01 |
| 6 | rs2395028  | 31424757 | T | 0.07 | 0.13  | 9.19E-01 | 9.36E-01 |
| 6 | rs2254386  | 31425033 | T | 0.47 | 0.22  | 7.28E-01 | 6.79E-01 |
| 6 | rs2596480  | 31425985 | A | 0.07 | 0.13  | 9.19E-01 | 9.36E-01 |
| 6 | rs3094228  | 31429927 | G | 0.19 | 1.00  | 2.13E-01 | 2.53E-01 |
| 6 | rs2255001  | 31430143 | C | 0.15 | -1.05 | 2.36E-01 | 2.58E-01 |



|   |            |          |   |      |       |          |          |
|---|------------|----------|---|------|-------|----------|----------|
| 6 | rs2395029  | 31431780 | G | 0.03 | -1.92 | 2.76E-01 | 2.51E-01 |
| 6 | rs2284178  | 31432125 | C | 0.49 | 0.06  | 9.19E-01 | 8.98E-01 |
| 6 | rs3094014  | 31433558 | T | 0.17 | 1.20  | 1.50E-01 | 1.74E-01 |
| 6 | rs2516518  | 31435119 | T | 0.08 | 0.28  | 8.14E-01 | 8.73E-01 |
| 6 | rs4713466  | 31435869 | T | 0.17 | -1.52 | 6.87E-02 | 5.96E-02 |
| 6 | rs2518028  | 31436047 | A | 0.31 | 0.26  | 7.00E-01 | 7.05E-01 |
| 6 | rs2523674  | 31436789 | C | 0.45 | 0.88  | 1.65E-01 | 1.84E-01 |
| 6 | rs2395031  | 31437305 | A | 0.06 | 0.17  | 9.01E-01 | 9.26E-01 |
| 6 | rs9267137  | 31438397 | C | 0.06 | -0.07 | 9.62E-01 | 9.36E-01 |
| 6 | rs7758090  | 31438794 | T | 0.07 | 0.15  | 9.06E-01 | 9.56E-01 |
| 6 | rs2844505  | 31439063 | G | 0.24 | 0.51  | 4.86E-01 | 4.28E-01 |
| 6 | rs1055569  | 31440082 | T | 0.33 | 0.31  | 6.47E-01 | 7.02E-01 |
| 6 | rs2516440  | 31440497 | T | 0.33 | 0.31  | 6.41E-01 | 6.87E-01 |
| 6 | rs4413654  | 31441349 | A | 0.26 | 0.44  | 5.41E-01 | 5.98E-01 |
| 6 | rs12665745 | 31441901 | A | 0.16 | 1.03  | 2.25E-01 | 2.33E-01 |
| 6 | rs6940467  | 31442137 | G | 0.10 | -0.70 | 5.13E-01 | 4.41E-01 |
| 6 | rs3131643  | 31442782 | T | 0.13 | 1.20  | 1.88E-01 | 2.03E-01 |
| 6 | rs12660382 | 31443323 | T | 0.19 | 0.69  | 3.86E-01 | 4.16E-01 |
| 6 | rs16899682 | 31443699 | C | 0.03 | -2.91 | 1.05E-01 | 9.05E-02 |
| 6 | rs2596534  | 31445345 | C | 0.41 | 0.69  | 2.90E-01 | 2.99E-01 |
| 6 | rs2395488  | 31445909 | G | 0.34 | 0.67  | 3.15E-01 | 3.24E-01 |
| 6 | rs2248372  | 31446466 | A | 0.30 | 0.44  | 5.26E-01 | 5.04E-01 |
| 6 | rs2248373  | 31446546 | T | 0.35 | -1.03 | 1.23E-01 | 1.15E-01 |
| 6 | rs2248462  | 31446796 | A | 0.20 | 0.28  | 7.28E-01 | 6.59E-01 |
| 6 | rs2516513  | 31447588 | A | 0.20 | 0.29  | 7.23E-01 | 6.58E-01 |
| 6 | rs2516424  | 31448315 | C | 0.34 | 0.66  | 3.24E-01 | 3.33E-01 |
| 6 | rs2248617  | 31448533 | A | 0.34 | 0.63  | 3.48E-01 | 3.51E-01 |
| 6 | rs3828893  | 31448653 | A | 0.06 | 0.34  | 7.96E-01 | 8.43E-01 |
| 6 | rs3749946  | 31448862 | A | 0.08 | -0.57 | 6.27E-01 | 5.47E-01 |
| 6 | rs3099844  | 31448976 | A | 0.11 | 1.33  | 1.88E-01 | 2.01E-01 |
| 6 | rs2905722  | 31449327 | T | 0.12 | 0.42  | 6.57E-01 | 6.63E-01 |
| 6 | rs2516509  | 31449994 | G | 0.20 | 0.40  | 6.22E-01 | 5.59E-01 |
| 6 | rs2523710  | 31450909 | T | 0.17 | -0.33 | 6.92E-01 | 6.83E-01 |
| 6 | rs2523706  | 31451567 | G | 0.31 | 0.42  | 5.38E-01 | 5.40E-01 |

|   |            |          |   |      |       |          |          |
|---|------------|----------|---|------|-------|----------|----------|
| 6 | rs2904600  | 31453113 | G | 0.20 | 0.30  | 7.13E-01 | 6.32E-01 |
| 6 | rs9267212  | 31453618 | T | 0.07 | -0.05 | 9.70E-01 | 8.92E-01 |
| 6 | rs17193640 | 31454887 | C | 0.07 | -0.35 | 7.85E-01 | 7.64E-01 |
| 6 | rs3094009  | 31457178 | A | 0.20 | -0.01 | 9.92E-01 | 9.85E-01 |
| 6 | rs9267289  | 31458205 | A | 0.07 | -0.17 | 8.94E-01 | 8.30E-01 |
| 6 | rs2516415  | 31459742 | T | 0.33 | 0.61  | 3.76E-01 | 3.73E-01 |
| 6 | rs3130922  | 31461089 | A | 0.33 | -0.33 | 6.27E-01 | 6.46E-01 |
| 6 | rs3828903  | 31464739 | A | 0.36 | -0.68 | 3.07E-01 | 3.39E-01 |
| 6 | rs3828914  | 31465819 | T | 0.35 | -0.77 | 2.42E-01 | 2.80E-01 |
| 6 | rs2855807  | 31469323 | C | 0.33 | 0.28  | 6.76E-01 | 7.05E-01 |
| 6 | rs2516496  | 31469491 | G | 0.14 | -0.70 | 4.59E-01 | 4.37E-01 |
| 6 | rs2534657  | 31472459 | A | 0.14 | -0.75 | 4.22E-01 | 4.09E-01 |
| 6 | rs2855812  | 31472720 | T | 0.22 | -0.12 | 8.77E-01 | 8.60E-01 |
| 6 | rs3134899  | 31473286 | C | 0.19 | 0.97  | 2.20E-01 | 2.32E-01 |
| 6 | rs3130615  | 31475413 | C | 0.22 | 0.57  | 4.47E-01 | 4.90E-01 |
| 6 | rs3132468  | 31475486 | G | 0.22 | 0.57  | 4.47E-01 | 4.90E-01 |
| 6 | rs3131635  | 31476134 | T | 0.22 | 0.54  | 4.77E-01 | 5.23E-01 |
| 6 | rs2844498  | 31476854 | A | 0.46 | -0.71 | 2.59E-01 | 2.98E-01 |
| 6 | rs2844496  | 31480398 | A | 0.10 | 0.21  | 8.46E-01 | 8.06E-01 |
| 6 | rs3131633  | 31480923 | T | 0.16 | 0.65  | 4.47E-01 | 4.55E-01 |
| 6 | rs2516400  | 31481105 | T | 0.32 | 0.29  | 6.76E-01 | 7.02E-01 |
| 6 | rs2516399  | 31481299 | C | 0.10 | 0.19  | 8.61E-01 | 8.23E-01 |
| 6 | rs2246986  | 31482203 | G | 0.10 | 0.21  | 8.46E-01 | 8.06E-01 |
| 6 | rs2844494  | 31483415 | G | 0.30 | 0.21  | 7.58E-01 | 7.88E-01 |
| 6 | rs9267444  | 31483458 | A | 0.35 | 0.48  | 4.71E-01 | 4.18E-01 |
| 6 | rs9267445  | 31483481 | C | 0.10 | 1.29  | 2.15E-01 | 2.17E-01 |
| 6 | rs2395045  | 31484517 | C | 0.20 | 0.21  | 7.83E-01 | 8.46E-01 |
| 6 | rs3131631  | 31484683 | C | 0.20 | 0.21  | 7.83E-01 | 8.46E-01 |
| 6 | rs3093998  | 31485174 | G | 0.34 | 1.00  | 1.35E-01 | 1.47E-01 |
| 6 | rs3130637  | 31488145 | T | 0.23 | 0.28  | 7.10E-01 | 7.91E-01 |
| 6 | rs3132454  | 31489644 | C | 0.38 | 0.21  | 7.45E-01 | 7.19E-01 |
| 6 | rs3093993  | 31490725 | G | 0.23 | 0.28  | 7.10E-01 | 7.91E-01 |
| 6 | rs9469021  | 31490970 | T | 0.02 | 2.51  | 2.63E-01 | 2.59E-01 |
| 6 | rs3095227  | 31491000 | T | 0.23 | 0.28  | 7.10E-01 | 7.91E-01 |

|   |            |          |   |      |       |          |          |
|---|------------|----------|---|------|-------|----------|----------|
| 6 | rs3093988  | 31492453 | T | 0.17 | -0.17 | 8.41E-01 | 8.71E-01 |
| 6 | rs3093986  | 31493421 | A | 0.17 | 0.98  | 2.45E-01 | 2.54E-01 |
| 6 | rs2734574  | 31493888 | T | 0.39 | -0.38 | 5.49E-01 | 5.90E-01 |
| 6 | rs3093983  | 31496925 | C | 0.16 | 1.00  | 2.35E-01 | 2.48E-01 |
| 6 | rs3130055  | 31497399 | C | 0.22 | 1.06  | 1.63E-01 | 1.68E-01 |
| 6 | rs3093978  | 31498497 | G | 0.17 | 0.98  | 2.45E-01 | 2.54E-01 |
| 6 | rs3853601  | 31499603 | C | 0.14 | -1.19 | 1.94E-01 | 1.84E-01 |
| 6 | rs3093948  | 31501413 | T | 0.17 | 0.96  | 2.52E-01 | 2.55E-01 |
| 6 | rs1055388  | 31501737 | G | 0.22 | 1.06  | 1.63E-01 | 1.68E-01 |
| 6 | rs3093976  | 31502861 | T | 0.17 | 0.98  | 2.45E-01 | 2.54E-01 |
| 6 | rs3130057  | 31504587 | G | 0.17 | 0.98  | 2.45E-01 | 2.54E-01 |
| 6 | rs2734583  | 31505480 | C | 0.10 | 1.17  | 2.51E-01 | 2.54E-01 |
| 6 | rs3130058  | 31505887 | T | 0.17 | 0.98  | 2.45E-01 | 2.54E-01 |
| 6 | rs933208   | 31506648 | C | 0.22 | 1.12  | 1.42E-01 | 1.48E-01 |
| 6 | rs2071596  | 31506691 | T | 0.19 | -0.64 | 4.32E-01 | 4.44E-01 |
| 6 | rs2516393  | 31506744 | T | 0.17 | 0.98  | 2.45E-01 | 2.54E-01 |
| 6 | rs2239709  | 31507447 | A | 0.06 | 0.84  | 5.39E-01 | 5.30E-01 |
| 6 | rs12665501 | 31508069 | G | 0.02 | 0.78  | 7.46E-01 | 6.34E-01 |
| 6 | rs7738430  | 31508836 | C | 0.03 | -0.11 | 9.57E-01 | 9.79E-01 |
| 6 | rs2523507  | 31509355 | C | 0.22 | 1.15  | 1.29E-01 | 1.34E-01 |
| 6 | rs2523505  | 31510002 | C | 0.08 | -0.43 | 7.20E-01 | 7.44E-01 |
| 6 | rs2844509  | 31510924 | C | 0.25 | 0.67  | 3.69E-01 | 3.81E-01 |
| 6 | rs12662306 | 31511138 | C | 0.02 | 1.17  | 6.30E-01 | 5.26E-01 |
| 6 | rs9267487  | 31511350 | C | 0.06 | -1.46 | 2.54E-01 | 1.99E-01 |
| 6 | rs2251824  | 31511857 | A | 0.16 | -1.22 | 1.62E-01 | 1.66E-01 |
| 6 | rs2071593  | 31512799 | T | 0.06 | 0.84  | 5.39E-01 | 5.30E-01 |
| 6 | rs2239705  | 31513402 | T | 0.18 | 1.12  | 1.70E-01 | 1.52E-01 |
| 6 | rs2523503  | 31513559 | T | 0.16 | -1.22 | 1.62E-01 | 1.66E-01 |
| 6 | rs2071591  | 31515799 | T | 0.37 | -0.74 | 2.52E-01 | 2.68E-01 |
| 6 | rs3219183  | 31516363 | C | 0.04 | -0.65 | 6.91E-01 | 6.98E-01 |
| 6 | rs7738380  | 31518015 | G | 0.02 | 0.21  | 9.24E-01 | 9.73E-01 |
| 6 | rs2523500  | 31518354 | C | 0.34 | 1.55  | 1.59E-02 | 1.50E-02 |
| 6 | rs6916921  | 31520426 | T | 0.10 | 2.59  | 1.45E-02 | 1.13E-02 |
| 6 | rs35969216 | 31521242 | T | 0.01 | 1.51  | 6.69E-01 | 7.06E-01 |

|   |            |          |   |      |       |          |          |
|---|------------|----------|---|------|-------|----------|----------|
| 6 | rs2255798  | 31521302 | G | 0.13 | -1.48 | 1.17E-01 | 1.10E-01 |
| 6 | rs6929796  | 31522669 | A | 0.19 | -0.76 | 3.44E-01 | 3.60E-01 |
| 6 | rs2857605  | 31524851 | G | 0.18 | 0.78  | 3.48E-01 | 3.50E-01 |
| 6 | rs2230365  | 31525448 | T | 0.14 | -1.41 | 1.21E-01 | 1.12E-01 |
| 6 | rs13192469 | 31526856 | C | 0.04 | -0.78 | 6.35E-01 | 6.42E-01 |
| 6 | rs4947324  | 31528130 | T | 0.09 | -0.09 | 9.37E-01 | 8.50E-01 |
| 6 | rs17200733 | 31528951 | G | 0.13 | -1.15 | 2.18E-01 | 2.07E-01 |
| 6 | rs2516390  | 31529883 | G | 0.38 | 1.35  | 3.36E-02 | 3.16E-02 |
| 6 | rs928815   | 31531215 | A | 0.38 | 1.35  | 3.36E-02 | 3.16E-02 |
| 6 | rs2857709  | 31532814 | T | 0.12 | 0.33  | 7.32E-01 | 7.51E-01 |
| 6 | rs2857708  | 31533606 | A | 0.13 | -1.45 | 1.25E-01 | 1.18E-01 |
| 6 | rs17200740 | 31535539 | C | 0.01 | 6.21  | 3.71E-02 | 3.28E-02 |
| 6 | rs2009658  | 31538244 | G | 0.16 | -1.10 | 2.08E-01 | 2.05E-01 |
| 6 | rs2844482  | 31539767 | A | 0.16 | -1.10 | 2.08E-01 | 2.05E-01 |
| 6 | rs1800683  | 31540071 | A | 0.37 | -0.69 | 2.85E-01 | 3.04E-01 |
| 6 | rs2229094  | 31540556 | C | 0.25 | -0.80 | 2.64E-01 | 2.34E-01 |
| 6 | rs2229092  | 31540757 | C | 0.05 | 0.50  | 7.26E-01 | 6.98E-01 |
| 6 | rs1041981  | 31540784 | A | 0.37 | -0.65 | 3.11E-01 | 3.34E-01 |
| 6 | rs3093662  | 31544189 | G | 0.08 | -1.11 | 3.52E-01 | 2.93E-01 |
| 6 | rs3093668  | 31546495 | C | 0.04 | -1.31 | 4.26E-01 | 3.67E-01 |
| 6 | rs7766988  | 31551347 | C | 0.04 | -1.20 | 4.80E-01 | 4.57E-01 |
| 6 | rs17200768 | 31553935 | T | 0.01 | 0.26  | 9.26E-01 | 9.03E-01 |
| 6 | rs2256965  | 31555130 | T | 0.40 | 1.42  | 2.42E-02 | 2.31E-02 |
| 6 | rs9267503  | 31555189 | A | 0.02 | 1.15  | 6.60E-01 | 6.79E-01 |
| 6 | rs13211368 | 31555818 | A | 0.02 | -1.32 | 6.12E-01 | 5.52E-01 |
| 6 | rs986475   | 31556709 | C | 0.09 | 2.40  | 2.72E-02 | 2.09E-02 |
| 6 | rs11575841 | 31557491 | A | 0.03 | -1.02 | 5.66E-01 | 5.45E-01 |
| 6 | rs2736191  | 31560910 | C | 0.03 | -0.43 | 8.10E-01 | 8.49E-01 |
| 6 | rs2844480  | 31564821 | A | 0.20 | -1.04 | 1.87E-01 | 1.81E-01 |
| 6 | rs2509217  | 31566204 | T | 0.03 | -1.52 | 4.10E-01 | 4.23E-01 |
| 6 | rs17200810 | 31566507 | A | 0.03 | 0.87  | 6.33E-01 | 6.50E-01 |
| 6 | rs2857596  | 31567422 | C | 0.23 | 0.73  | 3.26E-01 | 3.28E-01 |
| 6 | rs2857595  | 31568469 | T | 0.20 | -0.31 | 6.94E-01 | 7.46E-01 |
| 6 | rs2857700  | 31572481 | A | 0.11 | 1.41  | 1.66E-01 | 1.68E-01 |

|   |            |          |   |      |       |          |          |
|---|------------|----------|---|------|-------|----------|----------|
| 6 | rs9378200  | 31572927 | C | 0.06 | 2.05  | 1.40E-01 | 1.41E-01 |
| 6 | rs2844479  | 31572956 | G | 0.38 | -0.30 | 6.40E-01 | 5.88E-01 |
| 6 | rs9348876  | 31575276 | T | 0.07 | 1.89  | 1.45E-01 | 1.42E-01 |
| 6 | rs2844477  | 31578772 | G | 0.39 | 0.41  | 5.36E-01 | 5.37E-01 |
| 6 | rs3132451  | 31582025 | G | 0.19 | 0.09  | 9.09E-01 | 8.96E-01 |
| 6 | rs2844475  | 31583155 | T | 0.41 | 0.16  | 8.01E-01 | 8.40E-01 |
| 6 | rs28732150 | 31583224 | A | 0.05 | 1.40  | 3.47E-01 | 3.30E-01 |
| 6 | rs2269475  | 31583931 | A | 0.12 | 0.82  | 3.99E-01 | 3.62E-01 |
| 6 | rs2857597  | 31585000 | A | 0.25 | -0.65 | 3.73E-01 | 3.72E-01 |
| 6 | rs2736177  | 31586094 | G | 0.11 | 1.06  | 2.94E-01 | 2.97E-01 |
| 6 | rs2736176  | 31587561 | G | 0.33 | 0.19  | 7.74E-01 | 7.93E-01 |
| 6 | rs2736173  | 31589735 | A | 0.03 | -4.33 | 2.19E-02 | 2.22E-02 |
| 6 | rs3130622  | 31592524 | C | 0.17 | 0.41  | 6.16E-01 | 5.82E-01 |
| 6 | rs2260000  | 31593476 | C | 0.39 | 0.46  | 4.81E-01 | 4.84E-01 |
| 6 | rs3130071  | 31594628 | T | 0.11 | 1.12  | 2.68E-01 | 2.71E-01 |
| 6 | rs17207225 | 31597757 | T | 0.02 | -2.95 | 1.57E-01 | 1.12E-01 |
| 6 | rs3115663  | 31601843 | G | 0.17 | 0.41  | 6.16E-01 | 5.82E-01 |
| 6 | rs1046089  | 31602967 | A | 0.35 | 0.35  | 6.02E-01 | 5.66E-01 |
| 6 | rs2261033  | 31603591 | C | 0.48 | 0.23  | 7.13E-01 | 7.35E-01 |
| 6 | rs3132453  | 31604044 | A | 0.06 | 0.88  | 5.10E-01 | 5.14E-01 |
| 6 | rs35502919 | 31604355 | A | 0.07 | -0.88 | 4.58E-01 | 3.85E-01 |
| 6 | rs743400   | 31607111 | C | 0.06 | 0.03  | 9.85E-01 | 9.84E-01 |
| 6 | rs9267525  | 31607942 | C | 0.08 | -0.19 | 8.68E-01 | 9.18E-01 |
| 6 | rs3130628  | 31609272 | C | 0.17 | 0.41  | 6.10E-01 | 5.77E-01 |
| 6 | rs1077394  | 31610384 | G | 0.31 | 0.34  | 6.24E-01 | 6.59E-01 |
| 6 | rs1077393  | 31610529 | T | 0.48 | 0.53  | 4.00E-01 | 4.03E-01 |
| 6 | rs3130048  | 31613739 | C | 0.25 | 1.04  | 1.50E-01 | 1.34E-01 |
| 6 | rs2844463  | 31615167 | T | 0.16 | -1.30 | 1.34E-01 | 1.16E-01 |
| 6 | rs805303   | 31616366 | T | 0.37 | 0.05  | 9.38E-01 | 9.29E-01 |
| 6 | rs805302   | 31617957 | G | 0.37 | 0.04  | 9.47E-01 | 9.41E-01 |
| 6 | rs805301   | 31618121 | G | 0.37 | 0.04  | 9.47E-01 | 9.41E-01 |
| 6 | rs805300   | 31618567 | C | 0.05 | -1.46 | 3.27E-01 | 2.93E-01 |
| 6 | rs3130050  | 31618761 | G | 0.11 | 1.19  | 2.28E-01 | 2.30E-01 |
| 6 | rs3117583  | 31619576 | C | 0.17 | 0.41  | 6.16E-01 | 5.82E-01 |

|   |            |          |   |      |       |          |          |
|---|------------|----------|---|------|-------|----------|----------|
| 6 | rs813115   | 31620020 | C | 0.37 | 0.03  | 9.58E-01 | 9.54E-01 |
| 6 | rs3117582  | 31620520 | C | 0.09 | 0.90  | 4.13E-01 | 4.10E-01 |
| 6 | rs805298   | 31621095 | A | 0.05 | -1.47 | 3.25E-01 | 2.88E-01 |
| 6 | rs805264   | 31623873 | T | 0.04 | -1.23 | 4.22E-01 | 3.73E-01 |
| 6 | rs3132449  | 31626013 | A | 0.09 | 1.21  | 2.70E-01 | 2.64E-01 |
| 6 | rs28732157 | 31628216 | T | 0.05 | 1.32  | 3.70E-01 | 3.56E-01 |
| 6 | rs805262   | 31628733 | A | 0.47 | 0.85  | 1.81E-01 | 1.79E-01 |
| 6 | rs707974   | 31629499 | C | 0.12 | -0.35 | 7.16E-01 | 6.15E-01 |
| 6 | rs928814   | 31631907 | T | 0.03 | -2.71 | 1.79E-01 | 1.31E-01 |
| 6 | rs3130618  | 31632134 | A | 0.17 | 0.41  | 6.16E-01 | 5.82E-01 |
| 6 | rs34541484 | 31633389 | C | 0.01 | -1.38 | 5.91E-01 | 6.41E-01 |
| 6 | rs9267529  | 31634570 | C | 0.08 | -0.44 | 6.91E-01 | 7.34E-01 |
| 6 | rs14365    | 31635710 | C | 0.20 | -0.30 | 7.11E-01 | 6.74E-01 |
| 6 | rs3117578  | 31636031 | T | 0.11 | 1.19  | 2.28E-01 | 2.30E-01 |
| 6 | rs9267531  | 31636742 | G | 0.09 | 1.20  | 2.74E-01 | 2.69E-01 |
| 6 | rs805268   | 31638178 | G | 0.04 | -1.23 | 4.22E-01 | 3.73E-01 |
| 6 | rs35609644 | 31638848 | T | 0.01 | 2.37  | 3.75E-01 | 3.58E-01 |
| 6 | rs805267   | 31639757 | T | 0.05 | -1.46 | 3.27E-01 | 2.93E-01 |
| 6 | rs9267532  | 31639979 | T | 0.08 | -0.19 | 8.68E-01 | 9.18E-01 |
| 6 | rs1266076  | 31640518 | C | 0.37 | 0.07  | 9.15E-01 | 9.15E-01 |
| 6 | rs707919   | 31641139 | C | 0.33 | 0.20  | 7.72E-01 | 7.89E-01 |
| 6 | rs805272   | 31641386 | A | 0.04 | -1.23 | 4.22E-01 | 3.73E-01 |
| 6 | rs805269   | 31644282 | C | 0.05 | -1.50 | 3.16E-01 | 2.79E-01 |
| 6 | rs2280800  | 31646398 | T | 0.12 | 0.80  | 4.07E-01 | 3.73E-01 |
| 6 | rs9267534  | 31646766 | C | 0.08 | -0.44 | 6.91E-01 | 7.34E-01 |
| 6 | rs9267536  | 31651194 | C | 0.05 | -0.31 | 8.28E-01 | 8.73E-01 |
| 6 | rs707918   | 31654732 | T | 0.28 | -0.42 | 5.59E-01 | 5.54E-01 |
| 6 | rs915653   | 31657047 | C | 0.01 | 0.90  | 7.60E-01 | 7.66E-01 |
| 6 | rs805283   | 31657924 | T | 0.05 | -1.45 | 3.31E-01 | 2.97E-01 |
| 6 | rs28366155 | 31658634 | G | 0.06 | 0.03  | 9.85E-01 | 9.84E-01 |
| 6 | rs11552114 | 31660848 | T | 0.01 | -1.31 | 6.33E-01 | 5.52E-01 |
| 6 | rs805281   | 31661489 | G | 0.28 | -0.42 | 5.58E-01 | 5.53E-01 |
| 6 | rs805277   | 31662957 | A | 0.28 | -0.45 | 5.32E-01 | 5.25E-01 |
| 6 | rs805274   | 31665194 | G | 0.28 | -0.42 | 5.58E-01 | 5.53E-01 |

|   |            |          |   |      |       |          |          |
|---|------------|----------|---|------|-------|----------|----------|
| 6 | rs805273   | 31665452 | T | 0.07 | -1.92 | 1.13E-01 | 8.01E-02 |
| 6 | rs2295663  | 31669295 | C | 0.05 | 1.40  | 3.47E-01 | 3.30E-01 |
| 6 | rs984685   | 31669457 | A | 0.04 | 3.37  | 3.44E-02 | 2.53E-02 |
| 6 | rs1266071  | 31669496 | A | 0.12 | -0.28 | 7.73E-01 | 6.76E-01 |
| 6 | rs9267545  | 31671879 | A | 0.08 | -0.43 | 6.93E-01 | 7.34E-01 |
| 6 | rs34406901 | 31672268 | G | 0.08 | -3.33 | 5.71E-03 | 6.64E-03 |
| 6 | rs9267546  | 31673436 | A | 0.10 | -0.59 | 5.58E-01 | 5.60E-01 |
| 6 | rs2242653  | 31675765 | T | 0.14 | 1.48  | 1.12E-01 | 9.24E-02 |
| 6 | rs805286   | 31679307 | C | 0.27 | -0.79 | 2.69E-01 | 2.74E-01 |
| 6 | rs9469040  | 31679874 | T | 0.04 | -1.55 | 3.15E-01 | 2.92E-01 |
| 6 | rs385306   | 31681160 | T | 0.23 | -0.69 | 3.64E-01 | 3.93E-01 |
| 6 | rs442391   | 31681289 | A | 0.02 | -1.31 | 5.87E-01 | 5.11E-01 |
| 6 | rs9469042  | 31683018 | C | 0.05 | -1.50 | 3.18E-01 | 2.92E-01 |
| 6 | rs3749952  | 31683157 | G | 0.04 | -1.58 | 3.06E-01 | 2.84E-01 |
| 6 | rs3131384  | 31685654 | C | 0.15 | 0.78  | 3.74E-01 | 3.72E-01 |
| 6 | rs396763   | 31686726 | G | 0.01 | -1.31 | 6.33E-01 | 5.52E-01 |
| 6 | rs1065356  | 31687008 | T | 0.20 | -0.26 | 7.36E-01 | 7.68E-01 |
| 6 | rs805294   | 31688217 | C | 0.34 | -0.07 | 9.16E-01 | 9.31E-01 |
| 6 | rs805293   | 31688518 | A | 0.49 | 0.40  | 5.24E-01 | 5.15E-01 |
| 6 | rs805292   | 31690009 | T | 0.21 | -0.33 | 6.72E-01 | 7.05E-01 |
| 6 | rs805306   | 31692163 | C | 0.34 | -0.07 | 9.16E-01 | 9.33E-01 |
| 6 | rs11575845 | 31692386 | G | 0.05 | 0.15  | 9.20E-01 | 9.68E-01 |
| 6 | rs28366162 | 31695590 | C | 0.06 | -0.24 | 8.60E-01 | 8.26E-01 |
| 6 | rs805305   | 31697387 | C | 0.34 | -0.03 | 9.67E-01 | 9.90E-01 |
| 6 | rs805304   | 31698088 | C | 0.34 | -0.04 | 9.57E-01 | 9.70E-01 |
| 6 | rs17201046 | 31699573 | A | 0.01 | 0.47  | 8.61E-01 | 8.49E-01 |
| 6 | rs28381339 | 31706474 | C | 0.01 | 4.48  | 1.61E-01 | 1.73E-01 |
| 6 | rs3131382  | 31707730 | A | 0.06 | 1.27  | 3.47E-01 | 3.53E-01 |
| 6 | rs28381348 | 31708910 | C | 0.04 | -1.78 | 2.54E-01 | 2.69E-01 |
| 6 | rs707915   | 31710968 | T | 0.08 | -0.54 | 6.43E-01 | 6.65E-01 |
| 6 | rs2293861  | 31711124 | A | 0.13 | -0.26 | 7.87E-01 | 8.20E-01 |
| 6 | rs3132445  | 31712196 | T | 0.09 | 1.38  | 2.11E-01 | 2.06E-01 |
| 6 | rs3749953  | 31713124 | G | 0.10 | 0.34  | 7.47E-01 | 6.53E-01 |
| 6 | rs3828922  | 31713454 | T | 0.13 | -0.26 | 7.87E-01 | 8.20E-01 |

|   |            |          |   |      |       |          |          |
|---|------------|----------|---|------|-------|----------|----------|
| 6 | rs3131379  | 31721033 | T | 0.09 | 1.36  | 2.18E-01 | 2.13E-01 |
| 6 | rs3117574  | 31725230 | A | 0.09 | 1.37  | 2.14E-01 | 2.10E-01 |
| 6 | rs707939   | 31726688 | T | 0.38 | 0.52  | 4.25E-01 | 4.34E-01 |
| 6 | rs707938   | 31729359 | C | 0.29 | 0.07  | 9.24E-01 | 9.22E-01 |
| 6 | rs707937   | 31731014 | C | 0.18 | -0.12 | 8.89E-01 | 9.01E-01 |
| 6 | rs6905572  | 31731881 | T | 0.10 | 0.48  | 6.50E-01 | 5.60E-01 |
| 6 | rs3101017  | 31733466 | G | 0.09 | 1.36  | 2.18E-01 | 2.13E-01 |
| 6 | rs707928   | 31742590 | C | 0.30 | 0.09  | 8.99E-01 | 8.88E-01 |
| 6 | rs707927   | 31745518 | C | 0.04 | -1.61 | 3.20E-01 | 2.86E-01 |
| 6 | rs35756329 | 31753423 | C | 0.02 | -2.47 | 2.46E-01 | 2.16E-01 |
| 6 | rs480092   | 31764899 | G | 0.14 | 0.55  | 5.32E-01 | 4.63E-01 |
| 6 | rs17207552 | 31765056 | C | 0.02 | 0.40  | 8.67E-01 | 8.46E-01 |
| 6 | rs17201171 | 31773975 | C | 0.02 | -2.16 | 3.81E-01 | 3.62E-01 |
| 6 | rs34636308 | 31777687 | A | 0.02 | -2.16 | 3.81E-01 | 3.62E-01 |
| 6 | rs2075800  | 31777946 | A | 0.36 | 0.37  | 5.78E-01 | 5.98E-01 |
| 6 | rs2227956  | 31778272 | C | 0.15 | 0.75  | 3.97E-01 | 4.00E-01 |
| 6 | rs34378923 | 31782855 | C | 0.01 | 5.29  | 1.18E-01 | 1.02E-01 |
| 6 | rs9469058  | 31788050 | A | 0.03 | -1.02 | 5.61E-01 | 5.11E-01 |
| 6 | rs2763979  | 31794592 | T | 0.32 | -0.08 | 9.09E-01 | 9.27E-01 |
| 6 | rs2471980  | 31800868 | G | 0.29 | 0.12  | 8.68E-01 | 8.26E-01 |
| 6 | rs4711279  | 31802465 | G | 0.10 | 0.44  | 6.73E-01 | 5.96E-01 |
| 6 | rs9368699  | 31802541 | C | 0.04 | -0.59 | 7.21E-01 | 7.04E-01 |
| 6 | rs17201248 | 31803130 | T | 0.03 | -0.96 | 6.26E-01 | 6.33E-01 |
| 6 | rs17207629 | 31804610 | A | 0.06 | -3.60 | 6.17E-03 | 7.57E-03 |
| 6 | rs11968400 | 31804729 | T | 0.08 | -1.99 | 9.51E-02 | 8.47E-02 |
| 6 | rs733539   | 31807489 | A | 0.10 | 0.54  | 6.06E-01 | 5.30E-01 |
| 6 | rs3115673  | 31810085 | A | 0.12 | 0.58  | 5.44E-01 | 4.82E-01 |
| 6 | rs12210887 | 31815723 | T | 0.07 | -2.02 | 1.10E-01 | 1.02E-01 |
| 6 | rs9501157  | 31819123 | A | 0.02 | -0.91 | 6.61E-01 | 6.30E-01 |
| 6 | rs13191375 | 31819164 | A | 0.05 | -1.98 | 1.76E-01 | 1.73E-01 |
| 6 | rs4947331  | 31821041 | T | 0.09 | 0.64  | 5.69E-01 | 4.98E-01 |
| 6 | rs9267649  | 31824828 | A | 0.15 | 0.49  | 5.82E-01 | 5.88E-01 |
| 6 | rs13118    | 31827286 | A | 0.05 | -2.16 | 1.51E-01 | 1.51E-01 |
| 6 | rs11966200 | 31837066 | T | 0.04 | -1.53 | 3.54E-01 | 3.81E-01 |



|   |            |          |   |      |       |          |          |
|---|------------|----------|---|------|-------|----------|----------|
| 6 | rs660550   | 31837277 | C | 0.37 | 0.86  | 1.92E-01 | 1.73E-01 |
| 6 | rs577272   | 31837963 | G | 0.37 | 0.86  | 1.92E-01 | 1.73E-01 |
| 6 | rs644827   | 31838441 | T | 0.37 | 0.91  | 1.67E-01 | 1.46E-01 |
| 6 | rs494620   | 31838713 | A | 0.46 | 0.19  | 7.70E-01 | 8.07E-01 |
| 6 | rs2242665  | 31839309 | G | 0.37 | 0.86  | 1.92E-01 | 1.73E-01 |
| 6 | rs614549   | 31840625 | C | 0.40 | 0.49  | 4.56E-01 | 4.98E-01 |
| 6 | rs2736428  | 31843924 | A | 0.37 | 0.63  | 3.33E-01 | 3.57E-01 |
| 6 | rs9267658  | 31845985 | T | 0.11 | 0.83  | 4.08E-01 | 4.17E-01 |
| 6 | rs9267659  | 31846234 | A | 0.17 | 0.51  | 5.48E-01 | 5.21E-01 |
| 6 | rs652888   | 31851234 | C | 0.18 | 0.28  | 7.32E-01 | 7.25E-01 |
| 6 | rs7743807  | 31854543 | T | 0.04 | 0.70  | 6.58E-01 | 6.94E-01 |
| 6 | rs35875104 | 31856294 | C | 0.04 | -1.78 | 2.56E-01 | 2.58E-01 |
| 6 | rs9501159  | 31860118 | A | 0.01 | -0.09 | 9.74E-01 | 9.97E-01 |
| 6 | rs9267661  | 31860576 | T | 0.01 | 0.47  | 8.60E-01 | 8.37E-01 |
| 6 | rs659445   | 31864304 | C | 0.27 | 0.50  | 4.83E-01 | 4.80E-01 |
| 6 | rs2844456  | 31864674 | G | 0.08 | -0.62 | 6.00E-01 | 5.15E-01 |
| 6 | rs9469069  | 31866418 | G | 0.03 | -1.55 | 4.28E-01 | 3.89E-01 |
| 6 | rs9267663  | 31867253 | T | 0.03 | 0.48  | 8.07E-01 | 8.46E-01 |
| 6 | rs558702   | 31870326 | T | 0.08 | 1.02  | 3.63E-01 | 3.60E-01 |
| 6 | rs9267665  | 31870856 | T | 0.03 | -0.10 | 9.59E-01 | 9.25E-01 |
| 6 | rs6939227  | 31870873 | A | 0.04 | 0.66  | 6.77E-01 | 7.13E-01 |
| 6 | rs2763982  | 31872551 | C | 0.40 | 0.08  | 8.96E-01 | 9.27E-01 |
| 6 | rs519417   | 31878433 | A | 0.08 | 0.95  | 3.97E-01 | 3.98E-01 |
| 6 | rs3128761  | 31879158 | A | 0.11 | 1.00  | 3.18E-01 | 3.16E-01 |
| 6 | rs28435656 | 31880637 | A | 0.13 | 1.00  | 2.80E-01 | 2.51E-01 |
| 6 | rs17201403 | 31888062 | A | 0.02 | 0.27  | 9.08E-01 | 8.93E-01 |
| 6 | rs3130683  | 31888367 | C | 0.11 | 1.08  | 2.82E-01 | 2.74E-01 |
| 6 | rs497309   | 31892484 | G | 0.08 | 0.94  | 4.07E-01 | 4.07E-01 |
| 6 | rs2734335  | 31893944 | C | 0.45 | 0.11  | 8.71E-01 | 7.51E-01 |
| 6 | rs9332702  | 31894818 | G | 0.02 | -2.32 | 3.03E-01 | 2.51E-01 |
| 6 | rs9332704  | 31895619 | T | 0.02 | -0.08 | 9.73E-01 | 9.95E-01 |
| 6 | rs1042663  | 31905130 | A | 0.11 | -1.65 | 1.01E-01 | 1.31E-01 |
| 6 | rs550605   | 31907147 | C | 0.11 | -1.65 | 1.01E-01 | 1.31E-01 |
| 6 | rs638383   | 31908224 | A | 0.04 | 0.65  | 6.83E-01 | 7.17E-01 |

|   |            |          |   |      |       |          |          |
|---|------------|----------|---|------|-------|----------|----------|
| 6 | rs497239   | 31908761 | C | 0.11 | -1.65 | 1.01E-01 | 1.31E-01 |
| 6 | rs547154   | 31910938 | A | 0.11 | -1.72 | 8.79E-02 | 1.14E-01 |
| 6 | rs9332730  | 31912009 | C | 0.03 | 0.95  | 6.01E-01 | 6.14E-01 |
| 6 | rs512559   | 31916062 | C | 0.04 | 0.65  | 6.83E-01 | 7.17E-01 |
| 6 | rs537160   | 31916400 | T | 0.27 | 0.32  | 6.48E-01 | 6.29E-01 |
| 6 | rs541862   | 31916951 | G | 0.11 | -1.72 | 8.79E-02 | 1.14E-01 |
| 6 | rs4151657  | 31917540 | C | 0.39 | 0.68  | 2.95E-01 | 3.31E-01 |
| 6 | rs1270942  | 31918860 | C | 0.08 | 0.94  | 4.07E-01 | 4.07E-01 |
| 6 | rs2072633  | 31919578 | T | 0.40 | -0.55 | 3.89E-01 | 4.33E-01 |
| 6 | rs4151672  | 31919830 | T | 0.05 | 1.22  | 3.98E-01 | 3.83E-01 |
| 6 | rs4151664  | 31920873 | T | 0.05 | 0.42  | 7.68E-01 | 7.72E-01 |
| 6 | rs630379   | 31922254 | T | 0.22 | 1.02  | 1.79E-01 | 1.56E-01 |
| 6 | rs34555781 | 31925697 | C | 0.04 | -1.67 | 3.35E-01 | 2.95E-01 |
| 6 | rs17201466 | 31926600 | T | 0.03 | 3.25  | 1.14E-01 | 1.14E-01 |
| 6 | rs438999   | 31928306 | C | 0.11 | -1.63 | 1.02E-01 | 1.33E-01 |
| 6 | rs437179   | 31929014 | T | 0.22 | 1.20  | 1.11E-01 | 9.77E-02 |
| 6 | rs592229   | 31930441 | G | 0.41 | 0.15  | 8.19E-01 | 7.27E-01 |
| 6 | rs429608   | 31930462 | A | 0.18 | -0.93 | 2.53E-01 | 2.91E-01 |
| 6 | rs406936   | 31933161 | T | 0.15 | -1.44 | 1.06E-01 | 1.24E-01 |
| 6 | rs492899   | 31933518 | G | 0.07 | -0.26 | 8.32E-01 | 8.41E-01 |
| 6 | rs454212   | 31934372 | A | 0.15 | -1.45 | 1.05E-01 | 1.22E-01 |
| 6 | rs453821   | 31935311 | A | 0.15 | -1.42 | 1.10E-01 | 1.28E-01 |
| 6 | rs13217120 | 31935928 | C | 0.03 | -1.27 | 4.70E-01 | 4.25E-01 |
| 6 | rs416002   | 31938635 | G | 0.04 | 0.81  | 6.11E-01 | 6.55E-01 |
| 6 | rs389884   | 31940897 | C | 0.08 | 0.92  | 4.22E-01 | 4.23E-01 |
| 6 | rs387608   | 31941557 | T | 0.15 | -1.42 | 1.10E-01 | 1.28E-01 |
| 6 | rs6941112  | 31946614 | A | 0.35 | -0.26 | 6.87E-01 | 6.36E-01 |
| 6 | rs386480   | 31946837 | G | 0.22 | 1.12  | 1.42E-01 | 1.26E-01 |
| 6 | rs389883   | 31947460 | C | 0.22 | 1.12  | 1.42E-01 | 1.26E-01 |
| 6 | rs389512   | 31947594 | G | 0.15 | -1.42 | 1.11E-01 | 1.29E-01 |
| 6 | rs6455     | 32006896 | C | 0.01 | 4.71  | 1.14E-01 | 1.07E-01 |
| 6 | rs34214527 | 32014456 | T | 0.10 | -0.99 | 3.46E-01 | 3.26E-01 |
| 6 | rs2856448  | 32014575 | T | 0.41 | 1.17  | 6.99E-02 | 6.47E-02 |
| 6 | rs12333245 | 32019769 | A | 0.11 | -2.60 | 9.00E-03 | 1.26E-02 |

|   |            |          |   |      |       |          |          |
|---|------------|----------|---|------|-------|----------|----------|
| 6 | rs34562262 | 32020961 | C | 0.08 | -0.53 | 6.53E-01 | 5.65E-01 |
| 6 | rs11969759 | 32021130 | T | 0.05 | 0.08  | 9.58E-01 | 9.23E-01 |
| 6 | rs12198173 | 32026808 | A | 0.10 | -1.13 | 2.80E-01 | 2.57E-01 |
| 6 | rs2269429  | 32029183 | A | 0.11 | -2.69 | 7.49E-03 | 1.05E-02 |
| 6 | rs2239689  | 32030284 | T | 0.37 | 0.42  | 5.26E-01 | 5.77E-01 |
| 6 | rs7766862  | 32033007 | A | 0.37 | 0.44  | 5.07E-01 | 5.57E-01 |
| 6 | rs17207923 | 32036788 | T | 0.02 | -3.26 | 1.86E-01 | 1.77E-01 |
| 6 | rs1150755  | 32038550 | A | 0.13 | 1.16  | 2.17E-01 | 2.16E-01 |
| 6 | rs2071295  | 32038700 | A | 0.37 | 0.45  | 4.92E-01 | 5.41E-01 |
| 6 | rs204878   | 32045226 | T | 0.05 | 0.40  | 7.85E-01 | 8.30E-01 |
| 6 | rs7774197  | 32046275 | C | 0.05 | 0.33  | 8.26E-01 | 7.94E-01 |
| 6 | rs17201560 | 32047268 | C | 0.05 | 1.14  | 4.56E-01 | 4.57E-01 |
| 6 | rs185819   | 32050067 | T | 0.42 | 1.15  | 7.53E-02 | 6.80E-02 |
| 6 | rs1150754  | 32050758 | A | 0.13 | 1.12  | 2.34E-01 | 2.34E-01 |
| 6 | rs34878747 | 32052898 | T | 0.05 | -0.96 | 5.37E-01 | 5.12E-01 |
| 6 | rs169496   | 32052983 | A | 0.11 | -2.55 | 1.08E-02 | 1.50E-02 |
| 6 | rs204899   | 32057627 | A | 0.11 | -2.43 | 1.53E-02 | 2.12E-02 |
| 6 | rs17201595 | 32058425 | C | 0.02 | -3.43 | 1.11E-01 | 9.59E-02 |
| 6 | rs1150753  | 32059867 | C | 0.08 | 1.01  | 3.77E-01 | 3.77E-01 |
| 6 | rs2071293  | 32062687 | T | 0.35 | 0.47  | 4.79E-01 | 5.30E-01 |
| 6 | rs13199524 | 32066765 | T | 0.10 | -1.09 | 2.96E-01 | 2.73E-01 |
| 6 | rs3096695  | 32069806 | G | 0.10 | 1.05  | 3.06E-01 | 2.96E-01 |
| 6 | rs1269854  | 32070838 | G | 0.05 | 0.26  | 8.61E-01 | 9.11E-01 |
| 6 | rs3134954  | 32071893 | G | 0.11 | 1.37  | 1.71E-01 | 1.67E-01 |
| 6 | rs393544   | 32074518 | C | 0.04 | -0.10 | 9.47E-01 | 8.85E-01 |
| 6 | rs12153855 | 32074804 | C | 0.12 | -1.52 | 1.20E-01 | 1.07E-01 |
| 6 | rs2269426  | 32076499 | T | 0.44 | -0.93 | 1.47E-01 | 1.22E-01 |
| 6 | rs17207986 | 32079567 | C | 0.05 | -0.36 | 7.99E-01 | 8.69E-01 |
| 6 | rs3130342  | 32080146 | T | 0.11 | 1.45  | 1.51E-01 | 1.49E-01 |
| 6 | rs9469084  | 32080383 | T | 0.10 | -3.12 | 3.94E-03 | 6.05E-03 |
| 6 | rs8111     | 32083175 | A | 0.32 | -0.34 | 6.19E-01 | 5.84E-01 |
| 6 | rs8283     | 32083300 | C | 0.22 | -2.42 | 1.43E-03 | 1.76E-03 |
| 6 | rs28732175 | 32085278 | T | 0.04 | -0.05 | 9.78E-01 | 9.61E-01 |
| 6 | rs2228628  | 32088854 | G | 0.33 | -0.31 | 6.47E-01 | 6.12E-01 |

|   |            |          |   |      |       |          |          |
|---|------------|----------|---|------|-------|----------|----------|
| 6 | rs35580488 | 32097421 | C | 0.03 | -7.14 | 2.44E-04 | 3.97E-04 |
| 6 | rs9267803  | 32101762 | T | 0.32 | -0.46 | 4.98E-01 | 4.62E-01 |
| 6 | rs13211318 | 32102680 | C | 0.12 | -1.52 | 1.20E-01 | 1.07E-01 |
| 6 | rs4713505  | 32105001 | T | 0.33 | -0.31 | 6.40E-01 | 6.04E-01 |
| 6 | rs388629   | 32105512 | T | 0.05 | -0.74 | 6.08E-01 | 5.42E-01 |
| 6 | rs204999   | 32109979 | G | 0.26 | -0.49 | 4.90E-01 | 4.38E-01 |
| 6 | rs9296009  | 32114515 | T | 0.23 | 1.73  | 1.87E-02 | 2.13E-02 |
| 6 | rs28732178 | 32115222 | A | 0.05 | 0.07  | 9.63E-01 | 9.73E-01 |
| 6 | rs1053924  | 32120715 | A | 0.26 | 1.99  | 5.86E-03 | 5.85E-03 |
| 6 | rs9267810  | 32121594 | C | 0.26 | -0.10 | 8.94E-01 | 9.52E-01 |
| 6 | rs505997   | 32121932 | A | 0.04 | 0.12  | 9.38E-01 | 9.99E-01 |
| 6 | rs2269425  | 32123639 | T | 0.13 | 2.49  | 8.21E-03 | 7.21E-03 |
| 6 | rs3134603  | 32126002 | T | 0.10 | 1.55  | 1.21E-01 | 1.23E-01 |
| 6 | rs34129552 | 32130329 | G | 0.02 | 0.69  | 7.31E-01 | 7.68E-01 |
| 6 | rs2269424  | 32132233 | T | 0.25 | -0.11 | 8.79E-01 | 9.38E-01 |
| 6 | rs3096697  | 32134510 | T | 0.20 | -0.24 | 7.59E-01 | 7.44E-01 |
| 6 | rs3130347  | 32134656 | C | 0.20 | -0.22 | 7.87E-01 | 7.74E-01 |
| 6 | rs205000   | 32135878 | G | 0.01 | 2.24  | 4.75E-01 | 4.29E-01 |
| 6 | rs11553430 | 32136771 | A | 0.03 | -0.04 | 9.85E-01 | 9.73E-01 |
| 6 | rs3130283  | 32138545 | A | 0.11 | 1.68  | 9.38E-02 | 9.33E-02 |
| 6 | rs34280838 | 32139565 | C | 0.02 | 1.33  | 5.37E-01 | 5.93E-01 |
| 6 | rs3130284  | 32140487 | C | 0.20 | -0.22 | 7.79E-01 | 7.64E-01 |
| 6 | rs408359   | 32141883 | T | 0.09 | -3.31 | 3.90E-03 | 5.01E-03 |
| 6 | rs3134947  | 32145205 | A | 0.20 | -0.22 | 7.79E-01 | 7.64E-01 |
| 6 | rs2269423  | 32145707 | T | 0.34 | 1.59  | 1.73E-02 | 1.66E-02 |
| 6 | rs3134945  | 32146492 | T | 0.20 | -0.22 | 7.79E-01 | 7.64E-01 |
| 6 | rs3130349  | 32147696 | A | 0.16 | 0.60  | 4.92E-01 | 4.69E-01 |
| 6 | rs3134943  | 32147761 | A | 0.11 | 1.01  | 3.06E-01 | 2.94E-01 |
| 6 | rs3134940  | 32149816 | G | 0.16 | 0.60  | 4.92E-01 | 4.69E-01 |
| 6 | rs1035798  | 32151222 | T | 0.25 | -0.34 | 6.37E-01 | 6.71E-01 |
| 6 | rs2070600  | 32151443 | A | 0.08 | -0.64 | 5.80E-01 | 5.18E-01 |
| 6 | rs1800624  | 32152387 | A | 0.25 | -0.44 | 5.44E-01 | 5.55E-01 |
| 6 | rs204995   | 32154285 | C | 0.22 | -0.03 | 9.71E-01 | 9.48E-01 |
| 6 | rs204994   | 32154998 | A | 0.21 | 0.46  | 5.51E-01 | 5.53E-01 |

|   |            |          |   |      |       |          |          |
|---|------------|----------|---|------|-------|----------|----------|
| 6 | rs204993   | 32155581 | C | 0.29 | 0.17  | 8.07E-01 | 8.65E-01 |
| 6 | rs2856437  | 32157364 | T | 0.08 | -0.43 | 7.08E-01 | 6.12E-01 |
| 6 | rs176095   | 32158319 | C | 0.21 | 0.42  | 5.94E-01 | 5.93E-01 |
| 6 | rs12663103 | 32161324 | C | 0.06 | -1.18 | 3.58E-01 | 3.19E-01 |
| 6 | rs204991   | 32161366 | G | 0.18 | -0.33 | 6.84E-01 | 6.74E-01 |
| 6 | rs204990   | 32161430 | T | 0.18 | -0.32 | 7.00E-01 | 6.85E-01 |
| 6 | rs8192583  | 32163274 | T | 0.05 | -0.11 | 9.43E-01 | 9.30E-01 |
| 6 | rs8192576  | 32165300 | C | 0.02 | -4.17 | 5.63E-02 | 4.54E-02 |
| 6 | rs2114437  | 32166380 | C | 0.05 | -0.11 | 9.43E-01 | 9.30E-01 |
| 6 | rs8192575  | 32166384 | C | 0.09 | -0.45 | 6.86E-01 | 5.75E-01 |
| 6 | rs3134942  | 32168771 | A | 0.11 | 0.54  | 5.92E-01 | 5.59E-01 |
| 6 | rs204987   | 32168932 | A | 0.03 | 0.02  | 9.91E-01 | 9.36E-01 |
| 6 | rs28986321 | 32170980 | A | 0.02 | 2.51  | 2.27E-01 | 1.45E-01 |
| 6 | rs2071277  | 32171683 | G | 0.48 | -0.72 | 2.51E-01 | 2.34E-01 |
| 6 | rs3131296  | 32172993 | A | 0.11 | 0.50  | 6.15E-01 | 5.82E-01 |
| 6 | rs3130292  | 32176208 | C | 0.20 | -0.59 | 4.57E-01 | 4.34E-01 |
| 6 | rs206017   | 32176211 | G | 0.37 | 0.95  | 1.47E-01 | 1.13E-01 |
| 6 | rs9267833  | 32177900 | C | 0.26 | -0.31 | 6.69E-01 | 6.66E-01 |
| 6 | rs2071286  | 32179896 | A | 0.21 | 0.01  | 9.91E-01 | 9.57E-01 |
| 6 | rs206019   | 32180241 | T | 0.14 | -0.26 | 7.75E-01 | 6.63E-01 |
| 6 | rs206015   | 32182759 | T | 0.14 | -0.39 | 6.72E-01 | 5.74E-01 |
| 6 | rs404860   | 32184345 | C | 0.20 | -0.72 | 3.74E-01 | 2.95E-01 |
| 6 | rs3134798  | 32184705 | C | 0.22 | 2.71  | 3.91E-04 | 3.07E-04 |
| 6 | rs2854050  | 32185605 | T | 0.09 | -0.69 | 5.34E-01 | 4.39E-01 |
| 6 | rs8192591  | 32185796 | A | 0.04 | 0.36  | 8.35E-01 | 8.21E-01 |
| 6 | rs436388   | 32186264 | T | 0.37 | 0.58  | 3.69E-01 | 3.12E-01 |
| 6 | rs2256594  | 32186872 | C | 0.20 | -0.74 | 3.58E-01 | 2.79E-01 |
| 6 | rs394657   | 32187023 | G | 0.43 | -0.13 | 8.41E-01 | 8.52E-01 |
| 6 | rs1109771  | 32187605 | A | 0.44 | 0.37  | 5.59E-01 | 4.93E-01 |
| 6 | rs422951   | 32188383 | G | 0.42 | -0.11 | 8.59E-01 | 8.43E-01 |
| 6 | rs8192585  | 32188823 | T | 0.05 | 0.40  | 7.90E-01 | 8.24E-01 |
| 6 | rs415929   | 32189032 | G | 0.31 | -0.36 | 5.92E-01 | 5.52E-01 |
| 6 | rs8192584  | 32189192 | T | 0.05 | -6.43 | 6.31E-06 | 1.22E-05 |
| 6 | rs3132946  | 32190028 | A | 0.10 | 1.76  | 8.82E-02 | 8.44E-02 |

|   |            |          |   |      |       |          |          |
|---|------------|----------|---|------|-------|----------|----------|
| 6 | rs443198   | 32190406 | C | 0.40 | -1.19 | 6.25E-02 | 4.10E-02 |
| 6 | rs3134931  | 32190620 | G | 0.32 | -0.11 | 8.79E-01 | 8.52E-01 |
| 6 | rs434841   | 32191041 | A | 0.27 | 0.06  | 9.33E-01 | 9.70E-01 |
| 6 | rs3830041  | 32191339 | A | 0.11 | -0.89 | 3.80E-01 | 3.56E-01 |
| 6 | rs375244   | 32191457 | A | 0.23 | -0.79 | 2.90E-01 | 2.23E-01 |
| 6 | rs8192565  | 32191607 | A | 0.07 | -0.05 | 9.71E-01 | 9.26E-01 |
| 6 | rs2267644  | 32192560 | A | 0.04 | 1.32  | 4.09E-01 | 4.46E-01 |
| 6 | rs479536   | 32193678 | T | 0.07 | -1.70 | 1.62E-01 | 1.22E-01 |
| 6 | rs9267845  | 32193698 | T | 0.39 | -0.78 | 2.16E-01 | 1.63E-01 |
| 6 | rs499691   | 32194339 | T | 0.23 | -0.69 | 3.60E-01 | 3.33E-01 |
| 6 | rs3096691  | 32194854 | A | 0.39 | -0.78 | 2.16E-01 | 1.63E-01 |
| 6 | rs483574   | 32194956 | T | 0.16 | -0.63 | 4.83E-01 | 3.95E-01 |
| 6 | rs482759   | 32195017 | C | 0.16 | -0.63 | 4.83E-01 | 3.95E-01 |
| 6 | rs532385   | 32195359 | T | 0.19 | -1.17 | 1.30E-01 | 1.07E-01 |
| 6 | rs9378123  | 32196864 | G | 0.15 | -0.23 | 7.92E-01 | 7.41E-01 |
| 6 | rs1426713  | 32198049 | A | 0.08 | 1.08  | 3.65E-01 | 3.87E-01 |
| 6 | rs404890   | 32198867 | T | 0.36 | -0.01 | 9.86E-01 | 9.85E-01 |
| 6 | rs2849015  | 32198936 | A | 0.36 | 0.02  | 9.74E-01 | 9.74E-01 |
| 6 | rs377763   | 32199144 | T | 0.17 | 0.68  | 4.11E-01 | 3.91E-01 |
| 6 | rs9267873  | 32199352 | C | 0.42 | 0.15  | 8.05E-01 | 7.68E-01 |
| 6 | rs6936346  | 32200754 | T | 0.30 | -0.31 | 6.61E-01 | 6.30E-01 |
| 6 | rs12182351 | 32201707 | C | 0.24 | -0.52 | 4.93E-01 | 4.61E-01 |
| 6 | rs9501398  | 32202597 | T | 0.08 | 0.78  | 5.11E-01 | 5.41E-01 |
| 6 | rs3130299  | 32203537 | G | 0.24 | -0.47 | 5.33E-01 | 5.01E-01 |
| 6 | rs693797   | 32204433 | G | 0.39 | -0.04 | 9.50E-01 | 9.50E-01 |
| 6 | rs549182   | 32205045 | A | 0.02 | 3.38  | 1.74E-01 | 1.74E-01 |
| 6 | rs9267911  | 32205110 | C | 0.42 | 0.07  | 9.08E-01 | 9.08E-01 |
| 6 | rs6906128  | 32206304 | C | 0.28 | -0.44 | 5.38E-01 | 5.23E-01 |
| 6 | rs511027   | 32206687 | A | 0.13 | -1.70 | 6.73E-02 | 5.19E-02 |
| 6 | rs3130304  | 32207181 | A | 0.20 | 1.57  | 4.16E-02 | 2.75E-02 |
| 6 | rs17208216 | 32208449 | G | 0.02 | -2.71 | 2.67E-01 | 2.40E-01 |
| 6 | rs382259   | 32209027 | G | 0.27 | 0.38  | 5.87E-01 | 5.22E-01 |
| 6 | rs507778   | 32209861 | A | 0.33 | 1.06  | 1.11E-01 | 6.92E-02 |
| 6 | rs377743   | 32211065 | T | 0.25 | 0.68  | 3.35E-01 | 2.68E-01 |

|   |            |          |   |      |       |          |          |
|---|------------|----------|---|------|-------|----------|----------|
| 6 | rs412657   | 32211085 | C | 0.39 | 0.44  | 4.89E-01 | 4.28E-01 |
| 6 | rs9267947  | 32211218 | G | 0.43 | -1.66 | 8.56E-03 | 8.32E-03 |
| 6 | rs411326   | 32211317 | A | 0.25 | -0.92 | 2.08E-01 | 1.70E-01 |
| 6 | rs17576984 | 32212985 | T | 0.10 | -1.96 | 6.49E-02 | 7.23E-02 |
| 6 | rs9267956  | 32213638 | G | 0.45 | 0.60  | 3.36E-01 | 3.26E-01 |
| 6 | rs405875   | 32215188 | G | 0.49 | 1.03  | 9.79E-02 | 9.05E-02 |
| 6 | rs3115573  | 32218843 | C | 0.49 | 0.99  | 1.13E-01 | 1.05E-01 |
| 6 | rs9296015  | 32218989 | A | 0.16 | -0.86 | 3.18E-01 | 2.78E-01 |
| 6 | rs4959089  | 32219725 | G | 0.16 | -0.85 | 3.24E-01 | 2.83E-01 |
| 6 | rs9267992  | 32220397 | G | 0.10 | 2.77  | 7.11E-03 | 7.16E-03 |
| 6 | rs3130315  | 32220685 | A | 0.49 | 0.99  | 1.13E-01 | 1.05E-01 |
| 6 | rs3115570  | 32222706 | C | 0.49 | 1.02  | 1.04E-01 | 9.61E-02 |
| 6 | rs3130320  | 32223258 | T | 0.31 | -0.41 | 5.50E-01 | 5.88E-01 |
| 6 | rs28895018 | 32224378 | C | 0.10 | -4.63 | 1.92E-05 | 2.66E-05 |
| 6 | rs9268005  | 32224388 | C | 0.26 | 0.69  | 3.30E-01 | 3.72E-01 |
| 6 | rs9268013  | 32224828 | C | 0.21 | -2.22 | 4.63E-03 | 5.71E-03 |
| 6 | rs3132971  | 32230256 | G | 0.07 | 1.33  | 2.73E-01 | 2.57E-01 |
| 6 | rs9268055  | 32230608 | C | 0.22 | -2.08 | 6.35E-03 | 7.86E-03 |
| 6 | rs2395114  | 32233547 | G | 0.47 | 0.41  | 5.11E-01 | 5.11E-01 |
| 6 | rs3096681  | 32235177 | C | 0.22 | -2.08 | 6.35E-03 | 7.86E-03 |
| 6 | rs17201917 | 32235757 | G | 0.13 | -0.53 | 5.77E-01 | 5.19E-01 |
| 6 | rs6457527  | 32236976 | T | 0.04 | 2.85  | 7.61E-02 | 7.30E-02 |
| 6 | rs3096674  | 32238219 | A | 0.21 | -2.22 | 4.63E-03 | 5.71E-03 |
| 6 | rs3115557  | 32239651 | A | 0.21 | -2.22 | 4.63E-03 | 5.71E-03 |
| 6 | rs3130340  | 32244627 | C | 0.22 | -2.08 | 6.35E-03 | 7.86E-03 |
| 6 | rs9268103  | 32245370 | A | 0.13 | 1.85  | 4.44E-02 | 4.60E-02 |
| 6 | rs3115553  | 32245827 | A | 0.22 | -2.08 | 6.35E-03 | 7.86E-03 |
| 6 | rs3115552  | 32246156 | A | 0.22 | -2.08 | 6.35E-03 | 7.86E-03 |
| 6 | rs9268125  | 32252678 | C | 0.21 | -2.15 | 5.98E-03 | 7.29E-03 |
| 6 | rs9268131  | 32254452 | G | 0.21 | -2.22 | 4.63E-03 | 5.71E-03 |
| 6 | rs9268132  | 32254654 | G | 0.47 | 0.41  | 5.11E-01 | 5.11E-01 |
| 6 | rs9268135  | 32255230 | G | 0.21 | -2.22 | 4.63E-03 | 5.71E-03 |
| 6 | rs4711291  | 32256260 | G | 0.22 | -2.09 | 6.16E-03 | 7.68E-03 |
| 6 | rs926070   | 32257566 | C | 0.26 | 0.75  | 2.86E-01 | 3.21E-01 |

|   |            |          |   |      |       |          |          |
|---|------------|----------|---|------|-------|----------|----------|
| 6 | rs742695   | 32258574 | T | 0.01 | 0.28  | 9.17E-01 | 8.98E-01 |
| 6 | rs17422727 | 32259923 | G | 0.13 | -0.60 | 5.25E-01 | 4.70E-01 |
| 6 | rs6935269  | 32260350 | C | 0.22 | -2.08 | 6.35E-03 | 7.86E-03 |
| 6 | rs7775397  | 32261252 | G | 0.07 | 1.32  | 2.75E-01 | 2.59E-01 |
| 6 | rs34498363 | 32261630 | A | 0.02 | -2.50 | 3.32E-01 | 3.04E-01 |
| 6 | rs4947338  | 32261653 | C | 0.01 | 0.28  | 9.17E-01 | 8.98E-01 |
| 6 | rs11970194 | 32264645 | T | 0.01 | 0.28  | 9.17E-01 | 8.98E-01 |
| 6 | rs11963003 | 32264825 | G | 0.01 | 0.28  | 9.17E-01 | 8.98E-01 |
| 6 | rs17422797 | 32265528 | T | 0.04 | 2.01  | 2.12E-01 | 2.11E-01 |
| 6 | rs28366174 | 32266490 | C | 0.08 | -2.24 | 5.32E-02 | 3.67E-02 |
| 6 | rs6906662  | 32266506 | A | 0.10 | -4.62 | 2.10E-05 | 2.89E-05 |
| 6 | rs7750783  | 32268080 | T | 0.21 | -2.04 | 8.12E-03 | 9.91E-03 |
| 6 | rs537757   | 32268501 | A | 0.47 | 0.41  | 5.11E-01 | 5.12E-01 |
| 6 | rs6909427  | 32268701 | G | 0.22 | -2.08 | 6.35E-03 | 7.86E-03 |
| 6 | rs28366175 | 32269578 | C | 0.07 | -1.46 | 2.37E-01 | 1.83E-01 |
| 6 | rs3864300  | 32271807 | T | 0.21 | -2.10 | 7.13E-03 | 8.83E-03 |
| 6 | rs6457536  | 32273765 | G | 0.21 | -2.10 | 7.13E-03 | 8.83E-03 |
| 6 | rs9268192  | 32277211 | T | 0.21 | -2.06 | 8.39E-03 | 1.02E-02 |
| 6 | rs9268200  | 32278670 | T | 0.21 | -2.10 | 7.13E-03 | 8.83E-03 |
| 6 | rs9268202  | 32279340 | T | 0.21 | -2.32 | 3.10E-03 | 3.84E-03 |
| 6 | rs9501173  | 32279902 | A | 0.04 | -1.45 | 3.47E-01 | 3.39E-01 |
| 6 | rs1018433  | 32281510 | A | 0.21 | -2.16 | 5.56E-03 | 6.91E-03 |
| 6 | rs547261   | 32282033 | T | 0.48 | 0.45  | 4.65E-01 | 4.62E-01 |
| 6 | rs6910071  | 32282854 | G | 0.26 | 0.63  | 3.73E-01 | 4.00E-01 |
| 6 | rs6915455  | 32283494 | A | 0.21 | -2.16 | 5.56E-03 | 6.91E-03 |
| 6 | rs9268219  | 32284108 | G | 0.06 | 0.99  | 4.37E-01 | 3.95E-01 |
| 6 | rs9268220  | 32284340 | T | 0.17 | -2.30 | 7.43E-03 | 9.36E-03 |
| 6 | rs498422   | 32286761 | C | 0.05 | 1.74  | 2.18E-01 | 2.07E-01 |
| 6 | rs547077   | 32289318 | C | 0.48 | 0.53  | 3.97E-01 | 3.96E-01 |
| 6 | rs570963   | 32289594 | C | 0.09 | 0.30  | 7.77E-01 | 7.68E-01 |
| 6 | rs9268235  | 32290208 | T | 0.07 | 1.17  | 3.33E-01 | 3.15E-01 |
| 6 | rs4279480  | 32290927 | G | 0.26 | 0.74  | 2.97E-01 | 3.32E-01 |
| 6 | rs485774   | 32290954 | C | 0.48 | 0.39  | 5.33E-01 | 5.28E-01 |
| 6 | rs742697   | 32291542 | C | 0.26 | 0.74  | 2.97E-01 | 3.32E-01 |



|   |            |          |   |      |       |          |          |
|---|------------|----------|---|------|-------|----------|----------|
| 6 | rs525607   | 32292084 | A | 0.48 | 0.53  | 3.97E-01 | 3.96E-01 |
| 6 | rs552339   | 32292715 | T | 0.47 | 0.46  | 4.56E-01 | 4.57E-01 |
| 6 | rs533885   | 32293152 | C | 0.47 | 0.34  | 5.86E-01 | 5.88E-01 |
| 6 | rs476885   | 32294712 | C | 0.47 | 0.47  | 4.51E-01 | 4.54E-01 |
| 6 | rs9368713  | 32297337 | C | 0.47 | 0.44  | 4.77E-01 | 4.79E-01 |
| 6 | rs10484560 | 32298137 | A | 0.06 | 0.58  | 6.56E-01 | 6.17E-01 |
| 6 | rs9405090  | 32298372 | G | 0.48 | 0.48  | 4.45E-01 | 4.45E-01 |
| 6 | rs1003878  | 32299822 | T | 0.21 | -1.29 | 1.01E-01 | 1.21E-01 |
| 6 | rs1076712  | 32300152 | G | 0.32 | -1.13 | 9.46E-02 | 1.16E-01 |
| 6 | rs9366793  | 32301289 | C | 0.48 | 0.50  | 4.17E-01 | 4.17E-01 |
| 6 | rs16870056 | 32301630 | A | 0.01 | -4.05 | 3.12E-01 | 2.85E-01 |
| 6 | rs10807100 | 32303068 | A | 0.48 | 0.48  | 4.45E-01 | 4.45E-01 |
| 6 | rs6930681  | 32304031 | A | 0.48 | 0.48  | 4.45E-01 | 4.45E-01 |
| 6 | rs12526151 | 32304085 | G | 0.06 | 0.58  | 6.56E-01 | 6.17E-01 |
| 6 | rs926594   | 32305370 | C | 0.48 | 0.48  | 4.45E-01 | 4.45E-01 |
| 6 | rs3817982  | 32306262 | G | 0.48 | 0.48  | 4.45E-01 | 4.45E-01 |
| 6 | rs28732193 | 32306922 | C | 0.04 | -0.13 | 9.40E-01 | 9.33E-01 |
| 6 | rs2022533  | 32307260 | C | 0.48 | 0.54  | 3.87E-01 | 3.85E-01 |
| 6 | rs1033498  | 32307869 | G | 0.48 | 0.48  | 4.45E-01 | 4.45E-01 |
| 6 | rs9469099  | 32308908 | A | 0.02 | -0.62 | 7.69E-01 | 8.12E-01 |
| 6 | rs3117137  | 32309911 | A | 0.21 | -1.29 | 1.01E-01 | 1.21E-01 |
| 6 | rs3132954  | 32311459 | T | 0.38 | -1.46 | 2.35E-02 | 2.97E-02 |
| 6 | rs6904320  | 32312082 | A | 0.20 | 0.75  | 3.35E-01 | 3.91E-01 |
| 6 | rs3117134  | 32313550 | G | 0.32 | -1.10 | 1.02E-01 | 1.25E-01 |
| 6 | rs3117133  | 32313653 | C | 0.20 | 0.75  | 3.35E-01 | 3.91E-01 |
| 6 | rs910049   | 32315727 | A | 0.20 | 0.75  | 3.32E-01 | 3.89E-01 |
| 6 | rs3117120  | 32316804 | G | 0.32 | -1.14 | 9.26E-02 | 1.14E-01 |
| 6 | rs2076537  | 32317635 | T | 0.32 | -1.13 | 9.46E-02 | 1.16E-01 |
| 6 | rs761187   | 32318036 | C | 0.47 | 0.67  | 2.84E-01 | 2.83E-01 |
| 6 | rs1265763  | 32319364 | A | 0.16 | 0.48  | 5.74E-01 | 5.44E-01 |
| 6 | rs2395148  | 32321554 | T | 0.02 | -0.64 | 7.63E-01 | 8.05E-01 |
| 6 | rs1265761  | 32321597 | C | 0.04 | 2.63  | 9.64E-02 | 9.03E-02 |
| 6 | rs1265760  | 32321872 | A | 0.35 | 0.75  | 2.48E-01 | 2.74E-01 |
| 6 | rs1265759  | 32322393 | G | 0.35 | 0.75  | 2.45E-01 | 2.70E-01 |

|   |            |          |   |      |       |          |          |
|---|------------|----------|---|------|-------|----------|----------|
| 6 | rs1265758  | 32323529 | T | 0.34 | 0.85  | 1.93E-01 | 2.14E-01 |
| 6 | rs3129907  | 32323745 | G | 0.20 | 0.82  | 2.91E-01 | 3.46E-01 |
| 6 | rs6907322  | 32324945 | A | 0.15 | 0.61  | 4.88E-01 | 4.61E-01 |
| 6 | rs2894249  | 32325835 | C | 0.20 | 0.67  | 3.90E-01 | 4.54E-01 |
| 6 | rs2395150  | 32326045 | G | 0.34 | 0.81  | 2.12E-01 | 2.36E-01 |
| 6 | rs9268303  | 32326165 | A | 0.15 | 0.61  | 4.88E-01 | 4.61E-01 |
| 6 | rs9268326  | 32330153 | C | 0.48 | 0.48  | 4.45E-01 | 4.45E-01 |
| 6 | rs9268347  | 32331998 | A | 0.16 | 0.48  | 5.74E-01 | 5.44E-01 |
| 6 | rs3129922  | 32333098 | C | 0.35 | 0.75  | 2.48E-01 | 2.74E-01 |
| 6 | rs9268364  | 32333425 | T | 0.16 | 0.48  | 5.74E-01 | 5.44E-01 |
| 6 | rs9268365  | 32333439 | T | 0.16 | 0.59  | 4.89E-01 | 4.69E-01 |
| 6 | rs9268368  | 32333955 | C | 0.48 | 0.48  | 4.45E-01 | 4.45E-01 |
| 6 | rs7770048  | 32334754 | T | 0.11 | -0.28 | 7.85E-01 | 8.09E-01 |
| 6 | rs2073048  | 32335433 | T | 0.11 | -0.28 | 7.85E-01 | 8.09E-01 |
| 6 | rs3129934  | 32336187 | T | 0.12 | 1.89  | 4.15E-02 | 4.44E-02 |
| 6 | rs9268384  | 32336586 | G | 0.48 | 0.48  | 4.45E-01 | 4.45E-01 |
| 6 | rs3129939  | 32336766 | G | 0.17 | -2.20 | 9.90E-03 | 1.25E-02 |
| 6 | rs3129941  | 32337686 | A | 0.20 | 0.69  | 3.78E-01 | 4.42E-01 |
| 6 | rs3129943  | 32338695 | G | 0.23 | -1.17 | 1.23E-01 | 1.52E-01 |
| 6 | rs2050190  | 32339076 | C | 0.31 | -1.08 | 1.17E-01 | 1.66E-01 |
| 6 | rs2050189  | 32339647 | G | 0.20 | -0.23 | 7.66E-01 | 8.05E-01 |
| 6 | rs9391858  | 32341398 | G | 0.11 | 1.99  | 4.66E-02 | 4.11E-02 |
| 6 | rs7758128  | 32345283 | A | 0.06 | -7.65 | 5.98E-09 | 9.94E-09 |
| 6 | rs2894252  | 32345443 | A | 0.37 | -0.08 | 8.98E-01 | 7.86E-01 |
| 6 | rs2894253  | 32345540 | G | 0.08 | 1.90  | 1.04E-01 | 1.02E-01 |
| 6 | rs2395153  | 32345595 | G | 0.44 | 0.50  | 4.40E-01 | 5.22E-01 |
| 6 | rs2894254  | 32345689 | G | 0.07 | 1.48  | 2.25E-01 | 2.08E-01 |
| 6 | rs9405094  | 32346408 | A | 0.37 | -0.05 | 9.41E-01 | 8.28E-01 |
| 6 | rs2395157  | 32348145 | G | 0.36 | -0.01 | 9.88E-01 | 8.82E-01 |
| 6 | rs9268454  | 32349711 | G | 0.37 | -0.08 | 8.98E-01 | 7.86E-01 |
| 6 | rs9268456  | 32349946 | A | 0.37 | -0.08 | 8.98E-01 | 7.86E-01 |
| 6 | rs28732201 | 32350454 | A | 0.04 | -0.45 | 7.88E-01 | 7.80E-01 |
| 6 | rs9268460  | 32351283 | T | 0.49 | 1.15  | 7.16E-02 | 5.37E-02 |
| 6 | rs9268461  | 32351901 | A | 0.37 | -0.08 | 8.98E-01 | 7.86E-01 |

|   |            |          |   |      |       |          |          |
|---|------------|----------|---|------|-------|----------|----------|
| 6 | rs4424066  | 32354428 | A | 0.49 | 1.15  | 7.16E-02 | 5.37E-02 |
| 6 | rs9268472  | 32355605 | G | 0.49 | 1.15  | 7.16E-02 | 5.37E-02 |
| 6 | rs17423649 | 32357133 | T | 0.14 | -2.50 | 6.34E-03 | 7.57E-03 |
| 6 | rs17202259 | 32357489 | G | 0.14 | -2.47 | 6.99E-03 | 8.35E-03 |
| 6 | rs12529049 | 32357715 | T | 0.14 | -2.50 | 6.34E-03 | 7.57E-03 |
| 6 | rs3117099  | 32358270 | T | 0.19 | -0.78 | 3.36E-01 | 3.17E-01 |
| 6 | rs3117098  | 32358513 | C | 0.24 | 2.40  | 1.03E-03 | 5.62E-04 |
| 6 | rs16870123 | 32359460 | A | 0.14 | -2.52 | 5.65E-03 | 6.75E-03 |
| 6 | rs3817973  | 32361111 | G | 0.49 | 1.15  | 7.16E-02 | 5.37E-02 |
| 6 | rs12661254 | 32362173 | G | 0.02 | -0.27 | 9.04E-01 | 9.71E-01 |
| 6 | rs1980493  | 32363215 | G | 0.13 | -0.21 | 8.22E-01 | 8.45E-01 |
| 6 | rs2076530  | 32363816 | A | 0.47 | 1.36  | 3.28E-02 | 2.22E-02 |
| 6 | rs28366191 | 32364190 | G | 0.07 | -1.42 | 2.44E-01 | 1.91E-01 |
| 6 | rs3129955  | 32365840 | T | 0.24 | 2.41  | 9.75E-04 | 5.35E-04 |
| 6 | rs4248166  | 32366421 | C | 0.17 | -2.40 | 4.77E-03 | 5.84E-03 |
| 6 | rs3117116  | 32367017 | C | 0.10 | 3.44  | 8.32E-04 | 9.08E-04 |
| 6 | rs2294884  | 32367259 | C | 0.17 | -2.43 | 3.90E-03 | 4.74E-03 |
| 6 | rs3817963  | 32368087 | G | 0.37 | 0.07  | 9.17E-01 | 9.54E-01 |
| 6 | rs3763305  | 32369488 | A | 0.06 | 3.23  | 1.34E-02 | 1.35E-02 |
| 6 | rs2076524  | 32370684 | C | 0.37 | -0.08 | 8.98E-01 | 7.86E-01 |
| 6 | rs28362680 | 32370816 | T | 0.11 | -4.86 | 1.48E-06 | 1.72E-06 |
| 6 | rs2076522  | 32371179 | G | 0.37 | -0.08 | 8.98E-01 | 7.86E-01 |
| 6 | rs3793127  | 32371915 | T | 0.29 | 0.35  | 6.06E-01 | 6.57E-01 |
| 6 | rs28362683 | 32372963 | T | 0.11 | -5.49 | 1.09E-07 | 1.49E-07 |
| 6 | rs10947262 | 32373312 | T | 0.11 | -4.86 | 1.48E-06 | 1.72E-06 |
| 6 | rs3806156  | 32373698 | T | 0.48 | -1.89 | 2.24E-03 | 1.40E-03 |
| 6 | rs9268491  | 32374131 | G | 0.37 | -0.07 | 9.13E-01 | 7.98E-01 |
| 6 | rs3763309  | 32375973 | A | 0.29 | 0.35  | 6.06E-01 | 6.57E-01 |
| 6 | rs3763312  | 32376348 | A | 0.29 | 0.39  | 5.65E-01 | 6.12E-01 |
| 6 | rs3763313  | 32376471 | C | 0.15 | -0.16 | 8.55E-01 | 8.38E-01 |
| 6 | rs5007265  | 32378866 | T | 0.44 | 0.11  | 8.68E-01 | 7.17E-01 |
| 6 | rs3129962  | 32379383 | A | 0.07 | 1.19  | 3.43E-01 | 3.29E-01 |
| 6 | rs17208888 | 32379506 | A | 0.09 | 1.65  | 1.28E-01 | 8.29E-02 |
| 6 | rs9405098  | 32379736 | A | 0.02 | 4.64  | 5.19E-02 | 5.27E-02 |

|   |            |          |   |      |       |          |          |
|---|------------|----------|---|------|-------|----------|----------|
| 6 | rs3129963  | 32380208 | G | 0.20 | -2.92 | 3.30E-04 | 4.42E-04 |
| 6 | rs6932542  | 32380262 | A | 0.44 | 0.11  | 8.68E-01 | 7.17E-01 |
| 6 | rs9268528  | 32383108 | G | 0.43 | 0.74  | 2.35E-01 | 2.23E-01 |
| 6 | rs9268530  | 32383223 | C | 0.19 | -2.76 | 8.32E-04 | 1.08E-03 |
| 6 | rs2227138  | 32384500 | A | 0.12 | -0.07 | 9.39E-01 | 9.45E-01 |
| 6 | rs9268542  | 32384721 | G | 0.43 | 0.69  | 2.65E-01 | 2.56E-01 |
| 6 | rs2187820  | 32385873 | A | 0.19 | -2.76 | 8.32E-04 | 1.08E-03 |
| 6 | rs2395162  | 32387780 | T | 0.19 | -2.76 | 8.32E-04 | 1.08E-03 |
| 6 | rs2395163  | 32387809 | C | 0.29 | -0.07 | 9.12E-01 | 8.36E-01 |
| 6 | rs3135366  | 32388709 | G | 0.19 | -2.76 | 8.32E-04 | 1.08E-03 |
| 6 | rs3135363  | 32389648 | C | 0.28 | -1.30 | 6.60E-02 | 8.68E-02 |
| 6 | rs34330585 | 32390703 | C | 0.08 | 2.40  | 4.10E-02 | 3.83E-02 |
| 6 | rs3135353  | 32392877 | A | 0.12 | -0.09 | 9.28E-01 | 9.24E-01 |
| 6 | rs3135350  | 32392981 | G | 0.09 | 3.12  | 2.88E-03 | 2.84E-03 |
| 6 | rs3129971  | 32393235 | G | 0.09 | 3.12  | 2.88E-03 | 2.84E-03 |
| 6 | rs3135344  | 32395036 | G | 0.22 | 2.31  | 1.99E-03 | 1.89E-03 |
| 6 | rs3129843  | 32395726 | G | 0.07 | 1.91  | 1.19E-01 | 1.10E-01 |
| 6 | rs3135342  | 32396615 | A | 0.28 | -1.31 | 6.27E-02 | 7.06E-02 |
| 6 | rs9268585  | 32397403 | G | 0.44 | 0.82  | 1.88E-01 | 1.72E-01 |
| 6 | rs9268589  | 32398202 | A | 0.44 | 0.76  | 2.23E-01 | 2.07E-01 |
| 6 | rs4988821  | 32399022 | G | 0.28 | -1.31 | 6.27E-02 | 7.06E-02 |
| 6 | rs16870148 | 32399636 | A | 0.01 | 0.24  | 9.29E-01 | 8.89E-01 |
| 6 | rs9501626  | 32400344 | A | 0.11 | -1.70 | 8.76E-02 | 7.24E-02 |
| 6 | rs3129860  | 32401079 | A | 0.10 | 3.34  | 1.08E-03 | 1.21E-03 |
| 6 | rs3135338  | 32401217 | G | 0.29 | 0.33  | 6.37E-01 | 7.08E-01 |
| 6 | rs7356880  | 32401327 | T | 0.05 | -0.96 | 5.14E-01 | 4.92E-01 |
| 6 | rs2027856  | 32402705 | T | 0.11 | -1.70 | 8.76E-02 | 7.24E-02 |
| 6 | rs9268615  | 32402889 | A | 0.44 | 0.84  | 1.78E-01 | 1.65E-01 |
| 6 | rs2395173  | 32404859 | A | 0.29 | 0.33  | 6.37E-01 | 7.08E-01 |
| 6 | rs2395174  | 32404878 | G | 0.28 | -1.31 | 6.27E-02 | 7.06E-02 |
| 6 | rs2395175  | 32405026 | A | 0.23 | 0.19  | 8.01E-01 | 8.57E-01 |
| 6 | rs3129871  | 32406342 | A | 0.35 | -1.34 | 3.83E-02 | 3.50E-02 |
| 6 | rs9268644  | 32408044 | A | 0.37 | -0.04 | 9.49E-01 | 9.84E-01 |
| 6 | rs3135393  | 32408842 | C | 0.20 | -2.82 | 4.05E-04 | 4.73E-04 |

|   |            |          |   |      |       |          |          |
|---|------------|----------|---|------|-------|----------|----------|
| 6 | rs3129882  | 32409530 | G | 0.36 | 1.61  | 1.27E-02 | 8.05E-03 |
| 6 | rs9268658  | 32410716 | G | 0.48 | -0.34 | 5.90E-01 | 6.16E-01 |
| 6 | rs2239804  | 32411523 | A | 0.48 | -0.34 | 5.90E-01 | 6.16E-01 |
| 6 | rs11544315 | 32411573 | A | 0.04 | -0.55 | 7.43E-01 | 7.34E-01 |
| 6 | rs7192     | 32411646 | T | 0.37 | -1.00 | 1.28E-01 | 1.36E-01 |
| 6 | rs2239803  | 32411833 | G | 0.47 | -0.44 | 4.84E-01 | 5.01E-01 |
| 6 | rs4935356  | 32412388 | A | 0.48 | -0.35 | 5.76E-01 | 5.98E-01 |
| 6 | rs2395182  | 32413317 | G | 0.17 | 1.54  | 6.35E-02 | 6.29E-02 |
| 6 | rs3129890  | 32414273 | C | 0.28 | -2.20 | 2.34E-03 | 3.27E-03 |
| 6 | rs6937545  | 32418031 | A | 0.31 | -0.83 | 2.20E-01 | 2.46E-01 |
| 6 | rs28895095 | 32418848 | A | 0.11 | 1.50  | 1.37E-01 | 1.33E-01 |
| 6 | rs28895103 | 32419464 | A | 0.11 | 1.72  | 9.30E-02 | 8.86E-02 |
| 6 | rs7754768  | 32420179 | C | 0.39 | -1.03 | 1.15E-01 | 1.31E-01 |
| 6 | rs28895187 | 32424380 | A | 0.11 | 1.51  | 1.35E-01 | 1.31E-01 |
| 6 | rs7763262  | 32424882 | T | 0.31 | -0.83 | 2.20E-01 | 2.46E-01 |
| 6 | rs13198610 | 32425672 | T | 0.11 | 1.50  | 1.37E-01 | 1.33E-01 |
| 6 | rs28732227 | 32427361 | T | 0.05 | -0.31 | 8.37E-01 | 8.24E-01 |
| 6 | rs9268832  | 32427789 | T | 0.37 | -0.78 | 2.30E-01 | 2.67E-01 |
| 6 | rs6903608  | 32428285 | C | 0.24 | 2.91  | 4.98E-05 | 1.60E-05 |
| 6 | rs9268880  | 32431358 | T | 0.24 | 2.85  | 7.12E-05 | 2.36E-05 |
| 6 | rs9268911  | 32432406 | G | 0.28 | -2.54 | 3.61E-04 | 4.04E-04 |
| 6 | rs2395185  | 32433167 | T | 0.42 | -0.91 | 1.45E-01 | 8.92E-02 |
| 6 | rs9268977  | 32434939 | C | 0.28 | -2.54 | 3.61E-04 | 4.04E-04 |
| 6 | rs9268980  | 32435123 | G | 0.28 | -2.54 | 3.61E-04 | 4.04E-04 |
| 6 | rs9405108  | 32438648 | T | 0.42 | -0.91 | 1.45E-01 | 8.92E-02 |
| 6 | rs2157338  | 32439323 | A | 0.28 | -2.54 | 3.61E-04 | 4.04E-04 |
| 6 | rs17209754 | 32442703 | A | 0.06 | -1.11 | 4.07E-01 | 3.93E-01 |
| 6 | rs7748472  | 32448763 | G | 0.06 | -1.30 | 3.37E-01 | 3.26E-01 |
| 6 | rs1964995  | 32449411 | G | 0.48 | -0.20 | 7.46E-01 | 5.97E-01 |
| 6 | rs2157337  | 32501144 | A | 0.39 | -1.00 | 1.15E-01 | 1.57E-01 |
| 6 | rs28772724 | 32509357 | T | 0.42 | -0.80 | 1.89E-01 | 1.21E-01 |
| 6 | rs34369284 | 32514144 | A | 0.39 | -1.02 | 1.06E-01 | 1.50E-01 |
| 6 | rs28530648 | 32527079 | C | 0.07 | 2.10  | 7.51E-02 | 7.18E-02 |
| 6 | rs28366298 | 32560859 | C | 0.41 | -0.81 | 1.93E-01 | 1.25E-01 |

|   |            |          |   |      |       |          |          |
|---|------------|----------|---|------|-------|----------|----------|
| 6 | rs35265698 | 32561334 | G | 0.24 | 0.17  | 8.17E-01 | 9.56E-01 |
| 6 | rs11754183 | 32566156 | A | 0.03 | 1.93  | 2.78E-01 | 2.53E-01 |
| 6 | rs28605404 | 32569687 | G | 0.07 | 1.84  | 1.33E-01 | 1.31E-01 |
| 6 | rs477515   | 32569691 | T | 0.41 | -0.86 | 1.74E-01 | 1.10E-01 |
| 6 | rs2516049  | 32570400 | G | 0.41 | -0.81 | 1.98E-01 | 1.27E-01 |
| 6 | rs9270856  | 32570839 | A | 0.19 | 2.71  | 6.15E-04 | 5.66E-04 |
| 6 | rs2858870  | 32572251 | G | 0.16 | -1.69 | 4.97E-02 | 3.89E-02 |
| 6 | rs9270984  | 32573991 | T | 0.12 | 2.85  | 3.05E-03 | 2.89E-03 |
| 6 | rs9271100  | 32576478 | T | 0.19 | 2.70  | 6.18E-04 | 5.70E-04 |
| 6 | rs660895   | 32577380 | G | 0.26 | 0.02  | 9.72E-01 | 9.18E-01 |
| 6 | rs9271170  | 32577889 | T | 0.19 | 2.70  | 6.18E-04 | 5.70E-04 |
| 6 | rs532098   | 32578052 | C | 0.40 | 2.86  | 5.33E-06 | 2.03E-06 |
| 6 | rs35759989 | 32581096 | G | 0.06 | -1.13 | 3.97E-01 | 3.80E-01 |
| 6 | rs9271300  | 32581582 | G | 0.45 | 0.68  | 2.77E-01 | 2.46E-01 |
| 6 | rs642093   | 32582075 | A | 0.18 | 1.57  | 4.64E-02 | 2.91E-02 |
| 6 | rs13204672 | 32582796 | G | 0.17 | -1.72 | 4.17E-02 | 3.15E-02 |
| 6 | rs9271348  | 32583742 | G | 0.27 | 0.41  | 5.63E-01 | 6.40E-01 |
| 6 | rs9271366  | 32586854 | G | 0.10 | 3.47  | 7.94E-04 | 8.74E-04 |
| 6 | rs9271488  | 32589000 | T | 0.41 | -0.81 | 1.97E-01 | 1.31E-01 |
| 6 | rs17533090 | 32590722 | T | 0.11 | 1.38  | 1.62E-01 | 1.54E-01 |
| 6 | rs3129763  | 32590925 | A | 0.17 | 1.82  | 2.42E-02 | 1.41E-02 |
| 6 | rs35399661 | 32590990 | G | 0.11 | 1.38  | 1.62E-01 | 1.54E-01 |
| 6 | rs28421666 | 32592737 | G | 0.02 | -1.71 | 4.83E-01 | 5.03E-01 |
| 6 | rs34518860 | 32594103 | A | 0.17 | -3.46 | 3.77E-05 | 4.62E-05 |
| 6 | rs9272105  | 32599999 | A | 0.47 | -0.41 | 5.11E-01 | 6.32E-01 |
| 6 | rs9272143  | 32600803 | C | 0.45 | -0.30 | 6.24E-01 | 7.51E-01 |
| 6 | rs17211510 | 32602430 | A | 0.27 | -1.59 | 2.32E-02 | 2.76E-02 |
| 6 | rs3104369  | 32602482 | A | 0.25 | -0.70 | 3.27E-01 | 3.71E-01 |
| 6 | rs28383344 | 32605067 | G | 0.16 | -1.62 | 6.01E-02 | 4.75E-02 |
| 6 | rs2187668  | 32605884 | A | 0.08 | 1.85  | 1.07E-01 | 9.53E-02 |
| 6 | rs9273327  | 32623223 | C | 0.08 | 1.95  | 8.98E-02 | 7.97E-02 |
| 6 | rs9273349  | 32625869 | T | 0.39 | -0.05 | 9.35E-01 | 9.99E-01 |
| 6 | rs1063355  | 32627714 | A | 0.39 | -0.05 | 9.35E-01 | 9.99E-01 |
| 6 | rs9274407  | 32632832 | A | 0.11 | 2.92  | 3.02E-03 | 2.86E-03 |

|   |            |          |   |      |       |          |          |
|---|------------|----------|---|------|-------|----------|----------|
| 6 | rs2647025  | 32635949 | T | 0.31 | -0.85 | 2.02E-01 | 1.56E-01 |
| 6 | rs9274689  | 32636930 | T | 0.46 | 0.37  | 5.51E-01 | 4.68E-01 |
| 6 | rs17212090 | 32650809 | T | 0.29 | -0.02 | 9.73E-01 | 9.83E-01 |
| 6 | rs9275141  | 32651117 | T | 0.44 | 0.43  | 4.87E-01 | 4.30E-01 |
| 6 | rs2856695  | 32651894 | T | 0.44 | 0.42  | 5.00E-01 | 4.42E-01 |
| 6 | rs7755224  | 32652317 | G | 0.07 | 2.51  | 3.55E-02 | 3.22E-02 |
| 6 | rs17212420 | 32652400 | T | 0.29 | -0.03 | 9.65E-01 | 9.90E-01 |
| 6 | rs2856692  | 32653385 | C | 0.27 | -0.51 | 4.64E-01 | 3.71E-01 |
| 6 | rs9275184  | 32654714 | C | 0.12 | 0.63  | 5.00E-01 | 5.63E-01 |
| 6 | rs2856683  | 32655218 | C | 0.27 | -0.44 | 5.41E-01 | 4.43E-01 |
| 6 | rs4538747  | 32657334 | A | 0.29 | 0.00  | 9.99E-01 | 9.51E-01 |
| 6 | rs7774434  | 32657578 | C | 0.37 | 0.22  | 7.38E-01 | 8.29E-01 |
| 6 | rs7775228  | 32658079 | C | 0.14 | -1.50 | 9.18E-02 | 7.23E-02 |
| 6 | rs9275219  | 32659077 | T | 0.21 | 1.51  | 5.62E-02 | 6.24E-02 |
| 6 | rs9275224  | 32659878 | A | 0.49 | -0.78 | 2.11E-01 | 2.07E-01 |
| 6 | rs5000634  | 32663564 | C | 0.43 | 0.20  | 7.54E-01 | 7.61E-01 |
| 6 | rs6457617  | 32663851 | C | 0.50 | -0.82 | 1.90E-01 | 1.87E-01 |
| 6 | rs2647012  | 32664458 | A | 0.37 | -0.19 | 7.66E-01 | 8.24E-01 |
| 6 | rs9357152  | 32664960 | G | 0.29 | 0.02  | 9.75E-01 | 9.32E-01 |
| 6 | rs10484561 | 32665420 | G | 0.07 | 2.30  | 5.64E-02 | 5.13E-02 |
| 6 | rs9275312  | 32665728 | G | 0.15 | 0.28  | 7.49E-01 | 8.08E-01 |
| 6 | rs1794282  | 32666526 | A | 0.07 | 1.73  | 1.61E-01 | 1.51E-01 |
| 6 | rs2856725  | 32666738 | G | 0.37 | -0.19 | 7.66E-01 | 8.24E-01 |
| 6 | rs35998847 | 32666997 | A | 0.07 | 2.30  | 5.64E-02 | 5.13E-02 |
| 6 | rs2858312  | 32667230 | G | 0.38 | -0.62 | 3.35E-01 | 3.09E-01 |
| 6 | rs9275371  | 32668296 | C | 0.22 | 1.15  | 1.30E-01 | 1.41E-01 |
| 6 | rs9275374  | 32668526 | T | 0.22 | 1.13  | 1.38E-01 | 1.49E-01 |
| 6 | rs9275388  | 32669084 | C | 0.22 | 1.11  | 1.45E-01 | 1.54E-01 |
| 6 | rs9275390  | 32669156 | C | 0.22 | 1.12  | 1.42E-01 | 1.53E-01 |
| 6 | rs11752643 | 32669373 | T | 0.04 | -1.39 | 3.80E-01 | 3.72E-01 |
| 6 | rs9275393  | 32669439 | A | 0.22 | 1.13  | 1.38E-01 | 1.49E-01 |
| 6 | rs2647050  | 32669767 | C | 0.42 | -0.71 | 2.65E-01 | 2.40E-01 |
| 6 | rs9275406  | 32669955 | T | 0.22 | 1.13  | 1.38E-01 | 1.49E-01 |
| 6 | rs2858308  | 32670000 | A | 0.13 | -1.52 | 9.85E-02 | 7.09E-02 |

|   |            |          |   |      |       |          |          |
|---|------------|----------|---|------|-------|----------|----------|
| 6 | rs9275407  | 32670037 | T | 0.22 | 1.13  | 1.38E-01 | 1.49E-01 |
| 6 | rs9275418  | 32670244 | G | 0.22 | 1.13  | 1.38E-01 | 1.49E-01 |
| 6 | rs2856718  | 32670255 | A | 0.42 | -0.71 | 2.65E-01 | 2.40E-01 |
| 6 | rs2856717  | 32670308 | T | 0.36 | -0.08 | 9.03E-01 | 9.75E-01 |
| 6 | rs2858305  | 32670464 | C | 0.36 | -0.11 | 8.60E-01 | 9.30E-01 |
| 6 | rs35120848 | 32670495 | T | 0.09 | 1.49  | 1.77E-01 | 1.60E-01 |
| 6 | rs9275424  | 32670576 | G | 0.22 | 1.22  | 1.09E-01 | 1.18E-01 |
| 6 | rs9275425  | 32670874 | A | 0.22 | 1.13  | 1.38E-01 | 1.49E-01 |
| 6 | rs9275427  | 32670915 | T | 0.22 | 1.13  | 1.38E-01 | 1.49E-01 |
| 6 | rs2856705  | 32670956 | A | 0.13 | -1.52 | 9.85E-02 | 7.09E-02 |
| 6 | rs9275428  | 32670978 | G | 0.22 | 1.13  | 1.38E-01 | 1.49E-01 |
| 6 | rs13192471 | 32671103 | C | 0.09 | 1.49  | 1.77E-01 | 1.60E-01 |
| 6 | rs9275439  | 32671521 | C | 0.22 | 1.13  | 1.38E-01 | 1.49E-01 |
| 6 | rs9275495  | 32673574 | T | 0.13 | 0.69  | 4.53E-01 | 5.17E-01 |
| 6 | rs1794265  | 32674737 | C | 0.02 | 0.06  | 9.76E-01 | 9.51E-01 |
| 6 | rs28371293 | 32677099 | A | 0.42 | -0.71 | 2.65E-01 | 2.40E-01 |
| 6 | rs16898264 | 32677152 | A | 0.42 | -0.67 | 2.89E-01 | 2.63E-01 |
| 6 | rs9275563  | 32677912 | C | 0.46 | 0.34  | 5.82E-01 | 5.06E-01 |
| 6 | rs9275572  | 32678999 | A | 0.38 | -0.24 | 7.14E-01 | 7.94E-01 |
| 6 | rs3129727  | 32679690 | T | 0.02 | 0.04  | 9.82E-01 | 9.54E-01 |
| 6 | rs9275582  | 32680070 | T | 0.20 | 1.53  | 5.19E-02 | 5.90E-02 |
| 6 | rs7765379  | 32680928 | G | 0.15 | -1.03 | 2.46E-01 | 2.30E-01 |
| 6 | rs7745656  | 32680970 | T | 0.29 | -0.37 | 5.84E-01 | 5.65E-01 |
| 6 | rs2858332  | 32681161 | A | 0.49 | 0.61  | 3.28E-01 | 3.56E-01 |
| 6 | rs2858331  | 32681277 | C | 0.36 | 0.32  | 6.17E-01 | 6.10E-01 |
| 6 | rs9275595  | 32681355 | C | 0.20 | 1.53  | 5.19E-02 | 5.90E-02 |
| 6 | rs7454108  | 32681483 | C | 0.13 | 0.75  | 4.15E-01 | 4.74E-01 |
| 6 | rs9275596  | 32681631 | C | 0.34 | -0.10 | 8.77E-01 | 9.42E-01 |
| 6 | rs3957148  | 32682137 | G | 0.13 | 0.97  | 2.92E-01 | 3.41E-01 |
| 6 | rs3104404  | 32682174 | A | 0.17 | 0.59  | 4.72E-01 | 4.14E-01 |
| 6 | rs2894381  | 32682228 | A | 0.29 | -1.53 | 2.98E-02 | 3.67E-02 |
| 6 | rs3104405  | 32682308 | C | 0.24 | 2.00  | 5.21E-03 | 4.35E-03 |
| 6 | rs3873444  | 32682724 | A | 0.14 | -1.45 | 1.16E-01 | 1.13E-01 |
| 6 | rs9275602  | 32682812 | A | 0.16 | -0.22 | 7.97E-01 | 7.84E-01 |



|   |            |          |   |      |       |          |          |
|---|------------|----------|---|------|-------|----------|----------|
| 6 | rs3892710  | 32682862 | T | 0.22 | -2.11 | 5.03E-03 | 5.26E-03 |
| 6 | rs3997854  | 32682915 | G | 0.15 | 0.58  | 5.10E-01 | 5.58E-01 |
| 6 | rs9275615  | 32684272 | A | 0.14 | 0.70  | 4.30E-01 | 4.69E-01 |
| 6 | rs3916765  | 32685550 | A | 0.14 | 0.74  | 4.25E-01 | 4.64E-01 |
| 6 | rs3104398  | 32685685 | A | 0.11 | -1.37 | 1.58E-01 | 1.39E-01 |
| 6 | rs12177980 | 32686084 | A | 0.43 | -0.19 | 7.75E-01 | 8.01E-01 |
| 6 | rs9275659  | 32686103 | A | 0.21 | -1.38 | 8.14E-02 | 9.39E-02 |
| 6 | rs9275686  | 32687570 | A | 0.21 | -1.35 | 8.73E-02 | 1.01E-01 |
| 6 | rs9275698  | 32687973 | G | 0.34 | -1.37 | 4.11E-02 | 4.27E-02 |
| 6 | rs9461799  | 32689529 | C | 0.43 | -0.19 | 7.75E-01 | 8.01E-01 |
| 6 | rs9275793  | 32690027 | G | 0.23 | 1.99  | 8.20E-03 | 9.33E-03 |
| 6 | rs9275915  | 32692493 | G | 0.23 | 1.98  | 8.25E-03 | 9.39E-03 |
| 6 | rs28772340 | 32692953 | C | 0.43 | -0.13 | 8.40E-01 | 8.63E-01 |
| 6 | rs9276017  | 32695022 | T | 0.23 | 1.98  | 8.25E-03 | 9.39E-03 |
| 6 | rs9276157  | 32698369 | T | 0.23 | 1.97  | 8.77E-03 | 9.89E-03 |
| 6 | rs9276162  | 32698457 | G | 0.23 | 1.99  | 8.20E-03 | 9.33E-03 |
| 6 | rs2859078  | 32702449 | C | 0.21 | -1.28 | 1.04E-01 | 1.18E-01 |
| 6 | rs9276291  | 32702813 | T | 0.23 | 1.89  | 1.19E-02 | 1.30E-02 |
| 6 | rs7762228  | 32704266 | G | 0.02 | -1.75 | 4.43E-01 | 3.77E-01 |
| 6 | rs9276310  | 32704523 | A | 0.14 | -0.70 | 4.40E-01 | 4.04E-01 |
| 6 | rs13214069 | 32705248 | C | 0.42 | -0.16 | 8.04E-01 | 8.24E-01 |
| 6 | rs13199787 | 32705276 | T | 0.43 | -0.19 | 7.65E-01 | 7.92E-01 |
| 6 | rs7773694  | 32706334 | A | 0.23 | 1.93  | 1.02E-02 | 1.17E-02 |
| 6 | rs7755596  | 32706478 | C | 0.22 | 1.97  | 9.04E-03 | 1.05E-02 |
| 6 | rs9276370  | 32707295 | G | 0.44 | 0.54  | 3.99E-01 | 3.93E-01 |
| 6 | rs9276399  | 32708890 | G | 0.13 | -0.49 | 6.04E-01 | 5.64E-01 |
| 6 | rs4394270  | 32709964 | C | 0.33 | -1.24 | 6.52E-02 | 6.51E-02 |
| 6 | rs17500468 | 32711178 | G | 0.12 | 1.28  | 1.88E-01 | 1.77E-01 |
| 6 | rs17500510 | 32712818 | A | 0.13 | -1.63 | 8.48E-02 | 7.16E-02 |
| 6 | rs2239800  | 32713267 | C | 0.09 | -1.00 | 3.71E-01 | 3.89E-01 |
| 6 | rs9276435  | 32713867 | T | 0.17 | -1.04 | 2.28E-01 | 2.54E-01 |
| 6 | rs2071800  | 32714143 | T | 0.11 | -1.13 | 2.87E-01 | 2.51E-01 |
| 6 | rs4415152  | 32717024 | C | 0.07 | -0.94 | 4.46E-01 | 4.02E-01 |
| 6 | rs9276472  | 32717224 | G | 0.07 | -0.87 | 4.80E-01 | 4.35E-01 |

|   |            |          |   |      |       |          |          |
|---|------------|----------|---|------|-------|----------|----------|
| 6 | rs9276487  | 32718594 | A | 0.07 | -0.87 | 4.80E-01 | 4.35E-01 |
| 6 | rs5016066  | 32718818 | A | 0.50 | 0.53  | 4.10E-01 | 4.27E-01 |
| 6 | rs9276502  | 32719666 | C | 0.07 | -0.95 | 4.36E-01 | 3.97E-01 |
| 6 | rs9276516  | 32720302 | C | 0.07 | -0.88 | 4.74E-01 | 4.31E-01 |
| 6 | rs10807113 | 32722186 | A | 0.50 | -0.43 | 5.04E-01 | 5.20E-01 |
| 6 | rs7756516  | 32723917 | T | 0.50 | -0.43 | 5.04E-01 | 5.20E-01 |
| 6 | rs7774954  | 32724189 | A | 0.07 | -0.94 | 4.49E-01 | 4.08E-01 |
| 6 | rs2301271  | 32725193 | T | 0.43 | 0.62  | 3.36E-01 | 3.27E-01 |
| 6 | rs1023449  | 32727905 | T | 0.43 | 0.67  | 2.96E-01 | 2.90E-01 |
| 6 | rs2051549  | 32730086 | C | 0.43 | 0.60  | 3.55E-01 | 3.46E-01 |
| 6 | rs2071550  | 32730940 | T | 0.30 | 0.20  | 7.71E-01 | 7.01E-01 |
| 6 | rs1573649  | 32731258 | C | 0.49 | 0.82  | 2.07E-01 | 2.00E-01 |
| 6 | rs6903130  | 32732210 | G | 0.49 | 0.82  | 2.07E-01 | 2.01E-01 |
| 6 | rs9348894  | 32732677 | T | 0.30 | 0.20  | 7.71E-01 | 7.01E-01 |
| 6 | rs1894412  | 32734829 | G | 0.49 | 0.82  | 2.07E-01 | 2.00E-01 |
| 6 | rs6901084  | 32736936 | T | 0.44 | -0.51 | 4.36E-01 | 4.50E-01 |
| 6 | rs6457661  | 32737494 | T | 0.44 | -0.51 | 4.36E-01 | 4.50E-01 |
| 6 | rs9368741  | 32737507 | A | 0.30 | 0.20  | 7.71E-01 | 7.01E-01 |
| 6 | rs6457663  | 32739312 | A | 0.07 | -0.95 | 4.45E-01 | 3.94E-01 |
| 6 | rs1383265  | 32739888 | G | 0.20 | -1.35 | 9.22E-02 | 1.10E-01 |
| 6 | rs2857211  | 32740442 | T | 0.33 | 0.89  | 1.83E-01 | 2.41E-01 |
| 6 | rs2857210  | 32741742 | T | 0.30 | 0.97  | 1.55E-01 | 2.00E-01 |
| 6 | rs28724890 | 32741844 | A | 0.03 | -1.28 | 4.88E-01 | 4.80E-01 |
| 6 | rs12663317 | 32742827 | C | 0.09 | -1.54 | 1.66E-01 | 2.09E-01 |
| 6 | rs9276615  | 32743217 | C | 0.30 | 0.90  | 1.90E-01 | 2.40E-01 |
| 6 | rs13195441 | 32743298 | A | 0.26 | -0.59 | 4.14E-01 | 4.53E-01 |
| 6 | rs2857204  | 32744347 | A | 0.35 | -1.06 | 1.13E-01 | 1.48E-01 |
| 6 | rs9276644  | 32745043 | C | 0.35 | 0.13  | 8.48E-01 | 8.49E-01 |
| 6 | rs28986337 | 32748398 | T | 0.09 | -1.54 | 1.66E-01 | 2.09E-01 |
| 6 | rs34043227 | 32748590 | T | 0.08 | -1.46 | 2.17E-01 | 1.94E-01 |
| 6 | rs28986338 | 32748810 | T | 0.09 | -1.54 | 1.66E-01 | 2.09E-01 |
| 6 | rs28986359 | 32751349 | C | 0.09 | -1.54 | 1.66E-01 | 2.09E-01 |
| 6 | rs28986364 | 32751691 | C | 0.09 | -1.29 | 2.58E-01 | 3.12E-01 |
| 6 | rs719654   | 32752139 | T | 0.20 | -0.58 | 4.70E-01 | 5.01E-01 |

|   |            |          |   |      |       |          |          |
|---|------------|----------|---|------|-------|----------|----------|
| 6 | rs28986373 | 32752150 | A | 0.09 | -1.54 | 1.66E-01 | 2.09E-01 |
| 6 | rs13204139 | 32752685 | A | 0.09 | -1.54 | 1.66E-01 | 2.09E-01 |
| 6 | rs28986396 | 32754430 | A | 0.09 | -1.54 | 1.66E-01 | 2.09E-01 |
| 6 | rs7762279  | 32755290 | C | 0.07 | 1.74  | 1.69E-01 | 1.67E-01 |
| 6 | rs9276711  | 32757297 | T | 0.35 | 0.23  | 7.28E-01 | 7.32E-01 |
| 6 | rs2857167  | 32757396 | T | 0.30 | 0.89  | 1.91E-01 | 2.44E-01 |
| 6 | rs2621388  | 32757938 | T | 0.30 | 0.90  | 1.87E-01 | 2.36E-01 |
| 6 | rs7758736  | 32758394 | A | 0.16 | -0.18 | 8.43E-01 | 9.26E-01 |
| 6 | rs3948793  | 32759448 | T | 0.35 | 0.19  | 7.69E-01 | 7.75E-01 |
| 6 | rs2157079  | 32762103 | A | 0.37 | 0.30  | 6.47E-01 | 7.57E-01 |
| 6 | rs9276722  | 32762391 | G | 0.09 | -1.59 | 1.53E-01 | 1.91E-01 |
| 6 | rs2621377  | 32763110 | G | 0.47 | -0.23 | 7.14E-01 | 6.56E-01 |
| 6 | rs2857151  | 32763514 | T | 0.37 | 0.30  | 6.50E-01 | 7.60E-01 |
| 6 | rs9276726  | 32763888 | C | 0.30 | 0.64  | 3.37E-01 | 3.20E-01 |
| 6 | rs2621373  | 32765130 | G | 0.31 | -0.96 | 1.66E-01 | 2.05E-01 |
| 6 | rs7767167  | 32765182 | G | 0.10 | 2.57  | 1.41E-02 | 1.52E-02 |
| 6 | rs6912002  | 32765268 | C | 0.32 | 0.52  | 4.32E-01 | 4.06E-01 |
| 6 | rs1383261  | 32765451 | A | 0.32 | 0.57  | 3.89E-01 | 3.63E-01 |
| 6 | rs6932969  | 32765671 | G | 0.32 | 0.57  | 3.89E-01 | 3.63E-01 |
| 6 | rs7383606  | 32766593 | T | 0.32 | 0.57  | 3.89E-01 | 3.63E-01 |
| 6 | rs9276734  | 32766854 | A | 0.32 | 0.57  | 3.89E-01 | 3.63E-01 |
| 6 | rs2199874  | 32769926 | C | 0.32 | -0.97 | 1.55E-01 | 1.97E-01 |
| 6 | rs2621358  | 32770808 | A | 0.31 | -0.97 | 1.63E-01 | 2.02E-01 |
| 6 | rs2857143  | 32772636 | T | 0.37 | 0.36  | 5.86E-01 | 6.84E-01 |
| 6 | rs2199870  | 32773172 | G | 0.37 | 0.30  | 6.47E-01 | 7.58E-01 |
| 6 | rs7382619  | 32775809 | T | 0.32 | 0.56  | 4.02E-01 | 3.76E-01 |
| 6 | rs12207915 | 32777752 | C | 0.07 | 0.31  | 7.95E-01 | 7.63E-01 |
| 6 | rs7383433  | 32778531 | A | 0.37 | 0.30  | 6.50E-01 | 7.60E-01 |
| 6 | rs2621332  | 32780317 | C | 0.37 | 0.28  | 6.67E-01 | 7.77E-01 |
| 6 | rs2621331  | 32780470 | G | 0.39 | 0.30  | 6.44E-01 | 7.43E-01 |
| 6 | rs11244    | 32780724 | T | 0.26 | 0.67  | 3.40E-01 | 3.32E-01 |
| 6 | rs2621330  | 32781524 | A | 0.04 | -1.19 | 4.65E-01 | 4.36E-01 |
| 6 | rs2070121  | 32781554 | T | 0.08 | -0.20 | 8.68E-01 | 9.07E-01 |
| 6 | rs2856997  | 32781776 | T | 0.41 | -0.95 | 1.44E-01 | 1.84E-01 |

|   |            |          |   |      |       |          |          |
|---|------------|----------|---|------|-------|----------|----------|
| 6 | rs2071474  | 32782582 | A | 0.29 | -0.93 | 1.89E-01 | 2.31E-01 |
| 6 | rs2071473  | 32782605 | A | 0.35 | -1.03 | 1.26E-01 | 1.57E-01 |
| 6 | rs7383287  | 32783086 | G | 0.20 | 0.97  | 2.19E-01 | 2.04E-01 |
| 6 | rs2071472  | 32784620 | A | 0.30 | -0.91 | 2.01E-01 | 2.45E-01 |
| 6 | rs2071554  | 32784676 | A | 0.04 | -0.91 | 5.78E-01 | 5.73E-01 |
| 6 | rs2071469  | 32784783 | A | 0.36 | -0.91 | 1.72E-01 | 2.16E-01 |
| 6 | rs2857107  | 32785515 | A | 0.12 | -0.98 | 3.04E-01 | 2.44E-01 |
| 6 | rs17429444 | 32786068 | G | 0.12 | 0.67  | 4.92E-01 | 4.71E-01 |
| 6 | rs1894406  | 32787056 | A | 0.33 | -1.09 | 1.06E-01 | 1.30E-01 |
| 6 | rs17220136 | 32787337 | T | 0.05 | 0.47  | 7.59E-01 | 7.55E-01 |
| 6 | rs2857106  | 32787570 | G | 0.17 | -0.97 | 2.66E-01 | 2.63E-01 |
| 6 | rs9784758  | 32788511 | C | 0.05 | -0.86 | 5.38E-01 | 5.45E-01 |
| 6 | rs9784876  | 32788878 | A | 0.05 | -0.86 | 5.38E-01 | 5.45E-01 |
| 6 | rs2621321  | 32789480 | C | 0.26 | -1.26 | 8.78E-02 | 1.01E-01 |
| 6 | rs16870907 | 32789807 | T | 0.05 | -1.26 | 3.85E-01 | 3.95E-01 |
| 6 | rs16870914 | 32791774 | C | 0.02 | -1.28 | 6.04E-01 | 6.40E-01 |
| 6 | rs13209654 | 32792659 | C | 0.09 | -1.69 | 1.29E-01 | 1.62E-01 |
| 6 | rs16870923 | 32792693 | C | 0.02 | -1.21 | 6.17E-01 | 6.56E-01 |
| 6 | rs10484565 | 32795032 | A | 0.08 | -0.59 | 6.23E-01 | 6.22E-01 |
| 6 | rs241453   | 32796226 | T | 0.27 | -1.32 | 7.05E-02 | 7.93E-02 |
| 6 | rs241452   | 32796346 | G | 0.27 | -1.44 | 4.70E-02 | 5.34E-02 |
| 6 | rs241451   | 32796480 | G | 0.31 | -1.52 | 2.80E-02 | 3.19E-02 |
| 6 | rs17034    | 32796521 | A | 0.26 | -1.37 | 6.23E-02 | 7.24E-02 |
| 6 | rs241448   | 32796685 | C | 0.27 | -1.59 | 3.05E-02 | 3.50E-02 |
| 6 | rs241447   | 32796751 | G | 0.27 | -1.52 | 3.95E-02 | 4.55E-02 |
| 6 | rs4148876  | 32796793 | T | 0.09 | 0.92  | 3.89E-01 | 3.89E-01 |
| 6 | rs241446   | 32796967 | T | 0.27 | -1.41 | 5.33E-02 | 6.03E-02 |
| 6 | rs241445   | 32797072 | A | 0.27 | -1.41 | 5.34E-02 | 6.04E-02 |
| 6 | rs241440   | 32797361 | A | 0.27 | -1.40 | 5.40E-02 | 6.15E-02 |
| 6 | rs241439   | 32797537 | C | 0.37 | -0.74 | 2.71E-01 | 3.04E-01 |
| 6 | rs241438   | 32797620 | A | 0.33 | -0.65 | 3.46E-01 | 3.91E-01 |
| 6 | rs241437   | 32797684 | C | 0.37 | -0.78 | 2.54E-01 | 2.87E-01 |
| 6 | rs241436   | 32797876 | C | 0.45 | -0.53 | 4.06E-01 | 4.39E-01 |
| 6 | rs9380326  | 32798283 | C | 0.10 | -0.34 | 7.53E-01 | 7.60E-01 |

|   |            |          |   |      |       |          |          |
|---|------------|----------|---|------|-------|----------|----------|
| 6 | rs1015166  | 32798731 | T | 0.29 | -0.20 | 7.80E-01 | 8.44E-01 |
| 6 | rs241433   | 32798795 | G | 0.44 | 0.28  | 6.66E-01 | 6.71E-01 |
| 6 | rs2228397  | 32800224 | T | 0.24 | 0.25  | 7.41E-01 | 8.07E-01 |
| 6 | rs1800454  | 32800412 | A | 0.17 | 0.22  | 7.94E-01 | 7.26E-01 |
| 6 | rs241430   | 32802820 | A | 0.44 | 0.38  | 5.56E-01 | 5.51E-01 |
| 6 | rs4148871  | 32803316 | T | 0.23 | 0.25  | 7.42E-01 | 7.80E-01 |
| 6 | rs241429   | 32803840 | T | 0.44 | 1.01  | 1.17E-01 | 1.13E-01 |
| 6 | rs3819715  | 32804219 | T | 0.35 | -0.42 | 5.26E-01 | 4.77E-01 |
| 6 | rs241427   | 32804414 | T | 0.34 | 0.35  | 5.96E-01 | 6.48E-01 |
| 6 | rs3819721  | 32804798 | A | 0.29 | -0.63 | 3.67E-01 | 3.93E-01 |
| 6 | rs241425   | 32804909 | T | 0.41 | 0.13  | 8.43E-01 | 8.84E-01 |
| 6 | rs241424   | 32804934 | T | 0.43 | 0.14  | 8.26E-01 | 7.80E-01 |
| 6 | rs2071544  | 32806121 | A | 0.47 | -0.41 | 5.19E-01 | 4.74E-01 |
| 6 | rs4148870  | 32806391 | A | 0.49 | 0.21  | 7.45E-01 | 7.11E-01 |
| 6 | rs3763366  | 32807446 | G | 0.47 | -0.50 | 4.31E-01 | 3.86E-01 |
| 6 | rs3763349  | 32808232 | T | 0.44 | -0.22 | 7.30E-01 | 7.01E-01 |
| 6 | rs9357155  | 32809848 | A | 0.13 | -0.91 | 3.26E-01 | 3.21E-01 |
| 6 | rs6924102  | 32811383 | G | 0.48 | 0.38  | 5.53E-01 | 5.29E-01 |
| 6 | rs2071543  | 32811629 | A | 0.15 | -0.85 | 3.39E-01 | 3.44E-01 |
| 6 | rs2071541  | 32812858 | C | 0.11 | -0.15 | 8.80E-01 | 9.82E-01 |
| 6 | rs2071540  | 32812916 | A | 0.38 | 0.21  | 7.39E-01 | 7.92E-01 |
| 6 | rs8842     | 32813161 | G | 0.03 | -3.47 | 7.48E-02 | 5.53E-02 |
| 6 | rs1057373  | 32813279 | T | 0.08 | -1.41 | 2.29E-01 | 2.68E-01 |
| 6 | rs13215    | 32813852 | T | 0.06 | -0.25 | 8.54E-01 | 8.42E-01 |
| 6 | rs4711312  | 32814659 | G | 0.14 | -0.94 | 3.07E-01 | 3.41E-01 |
| 6 | rs1135216  | 32814975 | G | 0.14 | -0.95 | 3.00E-01 | 3.34E-01 |
| 6 | rs17213812 | 32815516 | T | 0.06 | -0.61 | 6.50E-01 | 6.35E-01 |
| 6 | rs2071482  | 32816700 | T | 0.14 | -0.81 | 3.65E-01 | 4.07E-01 |
| 6 | rs12527715 | 32816998 | C | 0.17 | -1.01 | 2.31E-01 | 2.64E-01 |
| 6 | rs2395269  | 32817774 | G | 0.14 | -0.42 | 6.45E-01 | 7.52E-01 |
| 6 | rs2127680  | 32818031 | C | 0.03 | 2.63  | 1.52E-01 | 1.24E-01 |
| 6 | rs2071538  | 32818678 | T | 0.20 | -0.16 | 8.42E-01 | 8.99E-01 |
| 6 | rs1057141  | 32818774 | G | 0.17 | -0.98 | 2.44E-01 | 2.76E-01 |
| 6 | rs2071481  | 32819865 | G | 0.11 | -1.27 | 2.02E-01 | 2.37E-01 |

|   |            |          |   |      |       |          |          |
|---|------------|----------|---|------|-------|----------|----------|
| 6 | rs1351383  | 32822269 | G | 0.45 | 0.35  | 5.79E-01 | 5.53E-01 |
| 6 | rs4713600  | 32822858 | T | 0.45 | 0.30  | 6.37E-01 | 6.05E-01 |
| 6 | rs991760   | 32823567 | T | 0.07 | -0.64 | 5.99E-01 | 6.71E-01 |
| 6 | rs17587    | 32825090 | A | 0.30 | 0.94  | 1.75E-01 | 1.72E-01 |
| 6 | rs2071477  | 32825348 | G | 0.45 | 0.30  | 6.37E-01 | 6.05E-01 |
| 6 | rs9276815  | 32825507 | T | 0.36 | 0.93  | 1.61E-01 | 1.48E-01 |
| 6 | rs241418   | 32827356 | T | 0.03 | -1.11 | 5.83E-01 | 5.31E-01 |
| 6 | rs241417   | 32827916 | G | 0.02 | -1.30 | 5.30E-01 | 4.77E-01 |
| 6 | rs9276825  | 32829714 | A | 0.47 | 0.17  | 7.88E-01 | 7.46E-01 |
| 6 | rs7767288  | 32830013 | A | 0.45 | 0.32  | 6.09E-01 | 5.78E-01 |
| 6 | rs7766900  | 32830034 | G | 0.47 | 0.17  | 7.88E-01 | 7.46E-01 |
| 6 | rs9276831  | 32832033 | G | 0.14 | 0.84  | 3.51E-01 | 3.28E-01 |
| 6 | rs3752430  | 32832667 | A | 0.39 | 0.22  | 7.25E-01 | 7.71E-01 |
| 6 | rs1383267  | 32833646 | T | 0.45 | 0.32  | 6.09E-01 | 5.78E-01 |
| 6 | rs10484566 | 32835258 | G | 0.06 | -0.71 | 5.74E-01 | 6.37E-01 |
| 6 | rs6931062  | 32835615 | A | 0.39 | 0.48  | 4.60E-01 | 4.60E-01 |
| 6 | rs9276835  | 32837129 | A | 0.39 | 0.48  | 4.60E-01 | 4.60E-01 |
| 6 | rs6906376  | 32838584 | A | 0.39 | 0.51  | 4.28E-01 | 4.32E-01 |
| 6 | rs6929078  | 32838664 | C | 0.39 | 0.48  | 4.56E-01 | 4.56E-01 |
| 6 | rs9276845  | 32840139 | G | 0.39 | 0.48  | 4.60E-01 | 4.60E-01 |
| 6 | rs9276857  | 32841319 | C | 0.38 | 0.54  | 4.09E-01 | 4.15E-01 |
| 6 | rs241415   | 32842691 | C | 0.02 | -0.77 | 7.05E-01 | 6.54E-01 |
| 6 | rs28724900 | 32844032 | T | 0.03 | -1.08 | 5.51E-01 | 5.41E-01 |
| 6 | rs7757767  | 32845873 | G | 0.39 | 0.48  | 4.53E-01 | 4.53E-01 |
| 6 | rs9276894  | 32846483 | C | 0.39 | 0.48  | 4.53E-01 | 4.53E-01 |
| 6 | rs9276900  | 32848566 | C | 0.38 | 0.47  | 4.72E-01 | 4.75E-01 |
| 6 | rs2127675  | 32850850 | C | 0.39 | 0.48  | 4.58E-01 | 4.57E-01 |
| 6 | rs17220297 | 32852052 | T | 0.02 | -2.49 | 2.35E-01 | 2.36E-01 |
| 6 | rs1002985  | 32852448 | T | 0.03 | 4.09  | 2.00E-02 | 1.93E-02 |
| 6 | rs7766964  | 32852928 | T | 0.09 | -1.38 | 1.95E-01 | 1.97E-01 |
| 6 | rs35571244 | 32853219 | C | 0.10 | -0.49 | 6.42E-01 | 6.07E-01 |
| 6 | rs10046115 | 32855174 | G | 0.11 | -1.70 | 9.40E-02 | 9.65E-02 |
| 6 | rs6457689  | 32855683 | T | 0.11 | -1.67 | 9.92E-02 | 1.02E-01 |
| 6 | rs10214759 | 32857295 | T | 0.02 | -3.62 | 7.82E-02 | 5.43E-02 |

|   |            |          |   |      |       |          |          |
|---|------------|----------|---|------|-------|----------|----------|
| 6 | rs10214886 | 32857419 | A | 0.11 | -1.69 | 9.49E-02 | 9.75E-02 |
| 6 | rs9276913  | 32857496 | G | 0.42 | -0.15 | 8.14E-01 | 7.62E-01 |
| 6 | rs9469300  | 32860752 | A | 0.11 | -1.59 | 1.20E-01 | 1.23E-01 |
| 6 | rs241409   | 32861920 | C | 0.11 | -0.39 | 7.00E-01 | 6.82E-01 |
| 6 | rs241407   | 32862740 | A | 0.11 | -0.39 | 6.93E-01 | 6.75E-01 |
| 6 | rs12195238 | 32862910 | T | 0.03 | -1.42 | 4.15E-01 | 3.94E-01 |
| 6 | rs11961569 | 32864681 | G | 0.08 | -1.12 | 3.23E-01 | 3.73E-01 |
| 6 | rs11969321 | 32864890 | C | 0.08 | -1.14 | 3.17E-01 | 3.66E-01 |
| 6 | rs17508331 | 32865338 | C | 0.08 | -1.14 | 3.17E-01 | 3.65E-01 |
| 6 | rs241405   | 32865798 | T | 0.45 | -0.48 | 4.42E-01 | 3.77E-01 |
| 6 | rs9276915  | 32865911 | A | 0.30 | 1.04  | 1.37E-01 | 1.29E-01 |
| 6 | rs241404   | 32865997 | G | 0.47 | 0.82  | 1.93E-01 | 1.75E-01 |
| 6 | rs9501233  | 32867123 | A | 0.08 | -1.13 | 3.19E-01 | 3.68E-01 |
| 6 | rs9461818  | 32867859 | G | 0.08 | -1.14 | 3.17E-01 | 3.65E-01 |
| 6 | rs10080898 | 32869882 | C | 0.08 | -1.14 | 3.17E-01 | 3.65E-01 |
| 6 | rs9296057  | 32869915 | G | 0.08 | -1.14 | 3.17E-01 | 3.65E-01 |
| 6 | rs3101942  | 32870057 | C | 0.36 | 0.09  | 8.91E-01 | 9.18E-01 |
| 6 | rs1591     | 32871317 | G | 0.08 | -1.14 | 3.17E-01 | 3.65E-01 |
| 6 | rs1585894  | 32875323 | A | 0.08 | -1.14 | 3.17E-01 | 3.65E-01 |
| 6 | rs241398   | 32875450 | A | 0.47 | 0.82  | 1.93E-01 | 1.75E-01 |
| 6 | rs9501234  | 32876049 | G | 0.08 | -0.99 | 3.89E-01 | 4.43E-01 |
| 6 | rs9500926  | 32876514 | C | 0.08 | -1.14 | 3.17E-01 | 3.65E-01 |
| 6 | rs1978030  | 32877073 | C | 0.08 | -1.14 | 3.17E-01 | 3.65E-01 |
| 6 | rs154988   | 32877266 | C | 0.45 | -0.48 | 4.42E-01 | 3.77E-01 |
| 6 | rs386542   | 32877768 | T | 0.08 | -1.14 | 3.17E-01 | 3.65E-01 |
| 6 | rs154986   | 32879233 | A | 0.08 | -1.01 | 3.81E-01 | 4.32E-01 |
| 6 | rs9469311  | 32880295 | G | 0.02 | -2.15 | 3.68E-01 | 3.88E-01 |
| 6 | rs9276921  | 32881502 | G | 0.14 | 1.04  | 2.62E-01 | 2.30E-01 |
| 6 | rs9276922  | 32881527 | A | 0.19 | -0.23 | 7.72E-01 | 8.18E-01 |
| 6 | rs35599935 | 32886487 | C | 0.10 | -0.22 | 8.37E-01 | 8.08E-01 |
| 6 | rs149392   | 32889971 | G | 0.08 | -0.99 | 3.89E-01 | 4.43E-01 |
| 6 | rs194679   | 32891338 | A | 0.05 | -0.76 | 6.06E-01 | 6.39E-01 |
| 6 | rs151724   | 32892688 | C | 0.03 | -1.38 | 4.40E-01 | 4.11E-01 |
| 6 | rs9296059  | 32893102 | C | 0.08 | -0.95 | 4.01E-01 | 4.53E-01 |

|   |            |          |   |      |       |          |          |
|---|------------|----------|---|------|-------|----------|----------|
| 6 | rs9469312  | 32893289 | A | 0.05 | -0.89 | 5.49E-01 | 5.80E-01 |
| 6 | rs9501239  | 32895580 | G | 0.05 | -1.11 | 4.55E-01 | 4.89E-01 |
| 6 | rs1116029  | 32895984 | T | 0.05 | -1.16 | 4.30E-01 | 4.59E-01 |
| 6 | rs154978   | 32899296 | G | 0.42 | -0.16 | 7.99E-01 | 7.36E-01 |
| 6 | rs3132131  | 32899485 | A | 0.28 | 0.67  | 3.35E-01 | 3.35E-01 |
| 6 | rs154973   | 32900642 | A | 0.11 | -0.78 | 4.48E-01 | 4.44E-01 |
| 6 | rs154972   | 32900651 | C | 0.42 | -0.11 | 8.69E-01 | 8.75E-01 |
| 6 | rs181997   | 32900718 | T | 0.33 | -0.35 | 6.13E-01 | 6.16E-01 |
| 6 | rs3129299  | 32900787 | A | 0.18 | -0.09 | 9.18E-01 | 8.76E-01 |
| 6 | rs3132132  | 32901934 | A | 0.15 | 0.36  | 6.89E-01 | 7.16E-01 |
| 6 | rs12662077 | 32902001 | A | 0.09 | 0.54  | 6.41E-01 | 6.82E-01 |
| 6 | rs23544    | 32903637 | A | 0.45 | 0.48  | 4.42E-01 | 3.95E-01 |
| 6 | rs68600    | 32903724 | A | 0.46 | 0.29  | 6.45E-01 | 5.84E-01 |
| 6 | rs151719   | 32903900 | G | 0.21 | -0.04 | 9.63E-01 | 8.99E-01 |
| 6 | rs2071556  | 32904601 | C | 0.44 | -1.25 | 4.78E-02 | 3.53E-02 |
| 6 | rs171329   | 32904661 | C | 0.49 | -0.75 | 2.33E-01 | 1.97E-01 |
| 6 | rs1042337  | 32904981 | C | 0.25 | 0.02  | 9.80E-01 | 9.25E-01 |
| 6 | rs714289   | 32905811 | C | 0.04 | 2.62  | 1.06E-01 | 9.72E-02 |
| 6 | rs6934645  | 32906228 | A | 0.03 | -0.51 | 7.87E-01 | 7.69E-01 |
| 6 | rs28365995 | 32909098 | A | 0.03 | 1.13  | 5.48E-01 | 4.80E-01 |
| 6 | rs35029304 | 32909533 | C | 0.07 | 1.58  | 2.18E-01 | 2.33E-01 |
| 6 | rs16871169 | 32910877 | A | 0.02 | -2.90 | 2.34E-01 | 2.31E-01 |
| 6 | rs3101944  | 32911127 | T | 0.11 | 0.57  | 5.74E-01 | 5.93E-01 |
| 6 | rs2395296  | 32911814 | A | 0.34 | -0.80 | 2.29E-01 | 1.97E-01 |
| 6 | rs10484567 | 32912552 | C | 0.02 | -2.73 | 1.75E-01 | 1.54E-01 |
| 6 | rs1480380  | 32913246 | T | 0.06 | 1.02  | 4.25E-01 | 4.03E-01 |
| 6 | rs194682   | 32914613 | T | 0.34 | 1.25  | 6.51E-02 | 6.68E-02 |
| 6 | rs17583915 | 32915852 | C | 0.03 | 1.13  | 5.48E-01 | 4.80E-01 |
| 6 | rs17617515 | 32918124 | T | 0.03 | 1.07  | 5.64E-01 | 4.96E-01 |
| 6 | rs3135029  | 32921774 | A | 0.07 | 0.54  | 6.61E-01 | 7.04E-01 |
| 6 | rs9378127  | 32922459 | A | 0.13 | -1.88 | 4.64E-02 | 4.40E-02 |
| 6 | rs209473   | 32922908 | A | 0.48 | -1.22 | 5.30E-02 | 5.53E-02 |
| 6 | rs28724903 | 32924061 | T | 0.10 | -1.93 | 6.51E-02 | 6.59E-02 |
| 6 | rs209474   | 32924584 | G | 0.39 | 1.47  | 2.35E-02 | 2.37E-02 |



|   |            |          |   |      |       |          |          |
|---|------------|----------|---|------|-------|----------|----------|
| 6 | rs209475   | 32925585 | A | 0.35 | 1.13  | 9.09E-02 | 9.51E-02 |
| 6 | rs580962   | 32925692 | G | 0.44 | -1.09 | 8.63E-02 | 8.65E-02 |
| 6 | rs6906517  | 32926580 | T | 0.02 | -2.91 | 2.18E-01 | 1.58E-01 |
| 6 | rs9276933  | 32930795 | C | 0.09 | -0.27 | 8.01E-01 | 7.53E-01 |
| 6 | rs129653   | 32931536 | C | 0.35 | 0.98  | 1.44E-01 | 1.56E-01 |
| 6 | rs206783   | 32932150 | A | 0.39 | 1.36  | 3.54E-02 | 3.67E-02 |
| 6 | rs17584088 | 32935509 | C | 0.03 | 0.96  | 5.99E-01 | 5.31E-01 |
| 6 | rs3918150  | 32936435 | G | 0.03 | 0.16  | 9.32E-01 | 8.56E-01 |
| 6 | rs3129296  | 32938291 | C | 0.09 | -0.15 | 8.96E-01 | 8.30E-01 |
| 6 | rs16871262 | 32939248 | G | 0.03 | 0.96  | 5.99E-01 | 5.31E-01 |
| 6 | rs17220479 | 32940815 | T | 0.03 | -1.38 | 4.61E-01 | 4.40E-01 |
| 6 | rs3130597  | 32941191 | T | 0.07 | 0.58  | 6.38E-01 | 6.86E-01 |
| 6 | rs12196597 | 32941214 | A | 0.13 | -1.80 | 5.86E-02 | 5.81E-02 |
| 6 | rs620202   | 32941910 | T | 0.28 | 0.80  | 2.65E-01 | 2.60E-01 |
| 6 | rs3918154  | 32943752 | G | 0.03 | -0.81 | 6.66E-01 | 6.51E-01 |
| 6 | rs11908    | 32944746 | T | 0.36 | 1.50  | 2.43E-02 | 2.21E-02 |
| 6 | rs3129307  | 32944987 | T | 0.07 | 0.58  | 6.38E-01 | 6.86E-01 |
| 6 | rs17220493 | 32945097 | T | 0.01 | -0.69 | 8.17E-01 | 8.00E-01 |
| 6 | rs3097644  | 32945530 | G | 0.07 | 0.42  | 7.37E-01 | 7.84E-01 |
| 6 | rs565876   | 32950050 | T | 0.36 | 1.47  | 2.70E-02 | 2.46E-02 |
| 6 | rs16871297 | 32950217 | G | 0.03 | -1.36 | 4.68E-01 | 4.44E-01 |
| 6 | rs17617793 | 32951161 | C | 0.03 | 0.96  | 5.99E-01 | 5.31E-01 |
| 6 | rs17220500 | 32951593 | G | 0.03 | 0.96  | 5.99E-01 | 5.31E-01 |
| 6 | rs3135034  | 32951662 | C | 0.11 | 0.78  | 4.43E-01 | 4.56E-01 |
| 6 | rs206777   | 32952546 | C | 0.42 | -0.91 | 1.53E-01 | 1.60E-01 |
| 6 | rs3097645  | 32953280 | G | 0.09 | -0.15 | 8.96E-01 | 8.30E-01 |
| 6 | rs206775   | 32954634 | G | 0.36 | 1.50  | 2.30E-02 | 2.07E-02 |
| 6 | rs3097646  | 32954689 | C | 0.11 | 0.86  | 3.96E-01 | 4.06E-01 |
| 6 | rs188245   | 32955976 | C | 0.43 | 1.70  | 7.12E-03 | 5.85E-03 |
| 6 | rs206769   | 32961104 | A | 0.22 | -1.68 | 2.89E-02 | 3.58E-02 |
| 6 | rs9500927  | 32961361 | A | 0.15 | -0.69 | 4.24E-01 | 3.46E-01 |
| 6 | rs206768   | 32961387 | C | 0.37 | 1.46  | 2.65E-02 | 2.40E-02 |
| 6 | rs172275   | 32961621 | T | 0.46 | -1.08 | 8.36E-02 | 8.82E-02 |
| 6 | rs206767   | 32962420 | G | 0.48 | -0.97 | 1.18E-01 | 1.32E-01 |

|   |            |          |   |      |       |          |          |
|---|------------|----------|---|------|-------|----------|----------|
| 6 | rs206765   | 32964696 | A | 0.36 | 1.30  | 4.69E-02 | 4.58E-02 |
| 6 | rs176248   | 32965942 | T | 0.29 | 0.85  | 2.25E-01 | 2.43E-01 |
| 6 | rs2395300  | 32968276 | A | 0.32 | -0.31 | 6.56E-01 | 6.17E-01 |
| 6 | rs172274   | 32969457 | A | 0.34 | -0.45 | 5.06E-01 | 4.60E-01 |
| 6 | rs12193085 | 32969696 | T | 0.13 | 0.08  | 9.29E-01 | 9.99E-01 |
| 6 | rs206762   | 32970450 | C | 0.42 | -0.01 | 9.94E-01 | 9.39E-01 |
| 6 | rs17214134 | 32971682 | A | 0.01 | 4.36  | 9.37E-02 | 1.09E-01 |
| 6 | rs3128931  | 32971708 | A | 0.26 | 0.43  | 5.57E-01 | 5.87E-01 |
| 6 | rs1044429  | 32972642 | A | 0.13 | 0.05  | 9.57E-01 | 9.69E-01 |
| 6 | rs376892   | 32972887 | T | 0.31 | 0.11  | 8.74E-01 | 9.32E-01 |
| 6 | rs35776718 | 32972903 | A | 0.15 | 1.59  | 6.83E-02 | 7.17E-02 |
| 6 | rs3129304  | 32973743 | G | 0.15 | -0.73 | 4.14E-01 | 3.99E-01 |
| 6 | rs2581     | 32974401 | A | 0.47 | 0.63  | 3.07E-01 | 2.67E-01 |
| 6 | rs6913008  | 32974843 | T | 0.18 | 1.67  | 4.51E-02 | 4.56E-02 |
| 6 | rs365066   | 32975257 | T | 0.46 | 0.56  | 3.65E-01 | 3.14E-01 |
| 6 | rs453779   | 32975381 | T | 0.41 | -0.12 | 8.56E-01 | 7.78E-01 |
| 6 | rs2267647  | 32975511 | A | 0.30 | -0.12 | 8.60E-01 | 8.03E-01 |
| 6 | rs11575906 | 32975808 | T | 0.01 | 1.68  | 5.29E-01 | 5.19E-01 |
| 6 | rs2284191  | 32976654 | A | 0.08 | -0.12 | 9.16E-01 | 9.07E-01 |
| 6 | rs86567    | 32976759 | C | 0.44 | -1.03 | 1.05E-01 | 1.17E-01 |
| 6 | rs403414   | 32977315 | C | 0.16 | 0.32  | 7.08E-01 | 7.28E-01 |
| 6 | rs381218   | 32977420 | A | 0.26 | -0.39 | 5.85E-01 | 6.54E-01 |
| 6 | rs396090   | 32977535 | C | 0.44 | -0.39 | 5.36E-01 | 4.74E-01 |
| 6 | rs6911639  | 32978178 | C | 0.24 | 0.67  | 3.69E-01 | 3.66E-01 |
| 6 | rs429916   | 32978587 | A | 0.06 | 0.23  | 8.59E-01 | 8.53E-01 |
| 6 | rs3763342  | 32978997 | A | 0.14 | 0.05  | 9.57E-01 | 9.63E-01 |
| 6 | rs3763341  | 32979020 | T | 0.11 | 0.76  | 4.53E-01 | 4.93E-01 |
| 6 | rs34354079 | 32981555 | A | 0.09 | -0.49 | 6.57E-01 | 6.56E-01 |
| 6 | rs6457699  | 32981647 | T | 0.45 | 1.01  | 1.15E-01 | 1.28E-01 |
| 6 | rs9276991  | 32981848 | G | 0.06 | -1.96 | 1.37E-01 | 1.36E-01 |
| 6 | rs9276992  | 32981937 | C | 0.06 | -1.96 | 1.37E-01 | 1.36E-01 |
| 6 | rs34570277 | 32982017 | T | 0.09 | -0.49 | 6.57E-01 | 6.56E-01 |
| 6 | rs423209   | 32983474 | A | 0.03 | 0.67  | 7.00E-01 | 7.63E-01 |
| 6 | rs6935846  | 32984011 | T | 0.45 | 1.12  | 8.15E-02 | 9.20E-02 |

|   |            |          |   |      |       |          |          |
|---|------------|----------|---|------|-------|----------|----------|
| 6 | rs9276994  | 32984255 | C | 0.37 | 1.15  | 8.63E-02 | 9.75E-02 |
| 6 | rs6936620  | 32984451 | A | 0.41 | -0.51 | 4.35E-01 | 4.70E-01 |
| 6 | rs3130604  | 32985052 | G | 0.15 | -0.94 | 2.94E-01 | 2.87E-01 |
| 6 | rs1367731  | 32985199 | T | 0.18 | 1.69  | 4.04E-02 | 4.04E-02 |
| 6 | rs6457701  | 32986573 | G | 0.37 | 1.14  | 8.68E-02 | 9.85E-02 |
| 6 | rs6933994  | 32987120 | G | 0.50 | 0.57  | 3.65E-01 | 3.70E-01 |
| 6 | rs423639   | 32987774 | T | 0.09 | -1.28 | 2.55E-01 | 2.44E-01 |
| 6 | rs6457702  | 32988049 | T | 0.46 | -0.84 | 1.93E-01 | 2.16E-01 |
| 6 | rs17220695 | 32988089 | T | 0.05 | -2.43 | 8.34E-02 | 8.88E-02 |
| 6 | rs17214311 | 32988175 | A | 0.05 | -2.43 | 8.34E-02 | 8.88E-02 |
| 6 | rs9296068  | 32988695 | G | 0.32 | 0.46  | 5.07E-01 | 5.33E-01 |
| 6 | rs6930052  | 32990481 | T | 0.05 | -2.88 | 5.80E-02 | 6.44E-02 |
| 6 | rs3097648  | 32990970 | T | 0.12 | -0.38 | 6.94E-01 | 6.70E-01 |
| 6 | rs13217173 | 32991738 | T | 0.13 | -1.17 | 2.09E-01 | 2.17E-01 |
| 6 | rs7738250  | 32992424 | A | 0.09 | -0.18 | 8.72E-01 | 8.65E-01 |
| 6 | rs397576   | 32993186 | C | 0.01 | -0.50 | 8.58E-01 | 8.69E-01 |
| 6 | rs9277015  | 32993266 | A | 0.35 | 1.99  | 2.30E-03 | 2.92E-03 |
| 6 | rs6933546  | 32996014 | T | 0.35 | 2.10  | 1.39E-03 | 1.84E-03 |
| 6 | rs443623   | 32996350 | A | 0.24 | -0.54 | 4.66E-01 | 5.52E-01 |
| 6 | rs6920606  | 32997674 | C | 0.48 | 1.36  | 3.11E-02 | 3.69E-02 |
| 6 | rs9277027  | 32998238 | G | 0.27 | 1.93  | 6.38E-03 | 7.85E-03 |
| 6 | rs1431396  | 32998564 | T | 0.38 | -0.84 | 1.96E-01 | 2.21E-01 |
| 6 | rs3135195  | 32999330 | C | 0.03 | -0.57 | 7.70E-01 | 7.34E-01 |
| 6 | rs429073   | 33001735 | C | 0.17 | -0.33 | 7.06E-01 | 6.79E-01 |
| 6 | rs34493748 | 33001771 | C | 0.05 | -1.89 | 2.14E-01 | 2.43E-01 |
| 6 | rs2858458  | 33003065 | G | 0.25 | -0.38 | 6.01E-01 | 5.80E-01 |
| 6 | rs423196   | 33003562 | G | 0.17 | -0.46 | 5.86E-01 | 5.77E-01 |
| 6 | rs448733   | 33003687 | T | 0.05 | -1.06 | 4.80E-01 | 4.71E-01 |
| 6 | rs3097656  | 33003745 | T | 0.03 | -0.57 | 7.70E-01 | 7.34E-01 |
| 6 | rs763469   | 33004387 | A | 0.15 | -0.94 | 2.87E-01 | 2.85E-01 |
| 6 | rs414564   | 33004917 | C | 0.05 | -1.06 | 4.80E-01 | 4.71E-01 |
| 6 | rs444821   | 33004935 | A | 0.25 | -0.38 | 6.01E-01 | 5.80E-01 |
| 6 | rs9277052  | 33005932 | C | 0.21 | -0.15 | 8.44E-01 | 8.25E-01 |
| 6 | rs9277053  | 33006222 | A | 0.28 | 1.96  | 5.54E-03 | 6.96E-03 |

|   |            |          |   |      |       |          |          |
|---|------------|----------|---|------|-------|----------|----------|
| 6 | rs410763   | 33007111 | T | 0.02 | -2.24 | 3.84E-01 | 3.99E-01 |
| 6 | rs7774158  | 33007752 | A | 0.36 | 1.63  | 1.39E-02 | 1.80E-02 |
| 6 | rs28893563 | 33011187 | A | 0.03 | -0.73 | 6.84E-01 | 5.95E-01 |
| 6 | rs652038   | 33012770 | T | 0.41 | 1.17  | 6.88E-02 | 7.81E-02 |
| 6 | rs398762   | 33014313 | G | 0.41 | 1.18  | 6.96E-02 | 8.12E-02 |
| 6 | rs3097659  | 33016033 | C | 0.15 | -0.96 | 2.75E-01 | 2.74E-01 |
| 6 | rs2567274  | 33016707 | T | 0.33 | 1.41  | 3.38E-02 | 3.84E-02 |
| 6 | rs375912   | 33016728 | C | 0.33 | 1.41  | 3.38E-02 | 3.84E-02 |
| 6 | rs2105929  | 33016887 | C | 0.29 | 2.00  | 4.44E-03 | 5.77E-03 |
| 6 | rs3128953  | 33020842 | A | 0.22 | -1.43 | 5.56E-02 | 5.86E-02 |
| 6 | rs367645   | 33024499 | A | 0.03 | 0.24  | 8.92E-01 | 9.13E-01 |
| 6 | rs376877   | 33024606 | G | 0.18 | -2.20 | 7.66E-03 | 6.87E-03 |
| 6 | rs2116263  | 33025493 | A | 0.02 | 2.47  | 2.71E-01 | 2.81E-01 |
| 6 | rs2395309  | 33026246 | G | 0.16 | 0.04  | 9.68E-01 | 9.94E-01 |
| 6 | rs9277334  | 33030112 | C | 0.13 | -1.87 | 4.41E-02 | 4.59E-02 |
| 6 | rs17214519 | 33032188 | A | 0.16 | 0.04  | 9.68E-01 | 9.94E-01 |
| 6 | rs3077     | 33033022 | C | 0.16 | 0.04  | 9.68E-01 | 9.94E-01 |
| 6 | rs2301226  | 33034596 | T | 0.13 | -1.84 | 4.69E-02 | 4.98E-02 |
| 6 | rs1367728  | 33034815 | A | 0.12 | 0.16  | 8.73E-01 | 8.49E-01 |
| 6 | rs9469341  | 33035877 | G | 0.16 | -0.01 | 9.91E-01 | 9.53E-01 |
| 6 | rs2301220  | 33038766 | A | 0.16 | 0.04  | 9.60E-01 | 9.99E-01 |
| 6 | rs9277341  | 33039625 | C | 0.29 | -1.36 | 5.15E-02 | 5.02E-02 |
| 6 | rs1431399  | 33041034 | G | 0.16 | 0.04  | 9.60E-01 | 9.99E-01 |
| 6 | rs987870   | 33042880 | C | 0.13 | -0.23 | 8.12E-01 | 7.70E-01 |
| 6 | rs2071349  | 33043520 | G | 0.13 | -2.34 | 9.70E-03 | 1.06E-02 |
| 6 | rs2071354  | 33044388 | C | 0.13 | -0.23 | 8.12E-01 | 7.70E-01 |
| 6 | rs3135021  | 33045558 | A | 0.28 | -1.24 | 7.16E-02 | 7.45E-02 |
| 6 | rs1431403  | 33047031 | C | 0.29 | -0.41 | 5.58E-01 | 5.31E-01 |
| 6 | rs9277357  | 33049979 | G | 0.31 | -0.56 | 4.17E-01 | 3.92E-01 |
| 6 | rs9277396  | 33051139 | A | 0.31 | -0.49 | 4.79E-01 | 4.55E-01 |
| 6 | rs9277464  | 33053352 | T | 0.27 | -0.40 | 5.76E-01 | 5.47E-01 |
| 6 | rs9277535  | 33054861 | G | 0.27 | -0.39 | 5.86E-01 | 5.58E-01 |
| 6 | rs9277554  | 33055538 | T | 0.31 | -0.49 | 4.79E-01 | 4.55E-01 |
| 6 | rs9277555  | 33055605 | A | 0.28 | -0.42 | 5.62E-01 | 5.42E-01 |

|   |            |          |   |      |       |          |          |
|---|------------|----------|---|------|-------|----------|----------|
| 6 | rs9277565  | 33056897 | T | 0.24 | -0.35 | 6.45E-01 | 6.19E-01 |
| 6 | rs10484569 | 33058952 | A | 0.04 | 0.73  | 6.63E-01 | 7.04E-01 |
| 6 | rs2281390  | 33059669 | A | 0.19 | 0.03  | 9.74E-01 | 9.46E-01 |
| 6 | rs2281389  | 33059796 | C | 0.20 | -0.59 | 4.60E-01 | 4.51E-01 |
| 6 | rs3128917  | 33059996 | G | 0.28 | -0.46 | 5.23E-01 | 5.01E-01 |
| 6 | rs2281388  | 33060118 | T | 0.02 | -0.09 | 9.65E-01 | 9.70E-01 |
| 6 | rs3117222  | 33060949 | A | 0.28 | -0.45 | 5.28E-01 | 5.05E-01 |
| 6 | rs3128918  | 33061098 | C | 0.19 | -0.02 | 9.81E-01 | 9.96E-01 |
| 6 | rs3130192  | 33061930 | T | 0.09 | 0.60  | 5.90E-01 | 5.50E-01 |
| 6 | rs6914616  | 33063592 | A | 0.04 | -0.77 | 6.40E-01 | 6.40E-01 |
| 6 | rs3130201  | 33064916 | A | 0.43 | -0.43 | 5.05E-01 | 5.03E-01 |
| 6 | rs2179915  | 33065734 | T | 0.04 | -0.77 | 6.40E-01 | 6.40E-01 |
| 6 | rs2395319  | 33067211 | T | 0.28 | -0.49 | 4.92E-01 | 4.69E-01 |
| 6 | rs3128924  | 33071424 | G | 0.37 | -0.79 | 2.23E-01 | 2.25E-01 |
| 6 | rs2064479  | 33072240 | A | 0.27 | -0.67 | 3.58E-01 | 3.56E-01 |
| 6 | rs2064478  | 33072266 | A | 0.24 | -0.70 | 3.56E-01 | 3.49E-01 |
| 6 | rs9469357  | 33074617 | T | 0.03 | -0.11 | 9.52E-01 | 9.42E-01 |
| 6 | rs3130215  | 33074963 | A | 0.39 | 1.10  | 9.15E-02 | 8.94E-02 |
| 6 | rs3117230  | 33075635 | C | 0.24 | -0.73 | 3.38E-01 | 3.30E-01 |
| 6 | rs9296081  | 33076661 | G | 0.03 | -0.16 | 9.35E-01 | 9.51E-01 |
| 6 | rs6457713  | 33077776 | T | 0.08 | -0.02 | 9.85E-01 | 9.50E-01 |
| 6 | rs9380343  | 33079166 | T | 0.04 | 0.75  | 6.55E-01 | 6.99E-01 |
| 6 | rs11751659 | 33081632 | G | 0.14 | -0.27 | 7.72E-01 | 7.76E-01 |
| 6 | rs1810472  | 33083121 | G | 0.30 | 0.27  | 6.93E-01 | 7.67E-01 |
| 6 | rs2395349  | 33083134 | A | 0.20 | 0.34  | 6.62E-01 | 6.55E-01 |
| 6 | rs9277656  | 33084148 | T | 0.20 | 0.34  | 6.62E-01 | 6.55E-01 |
| 6 | rs3117039  | 33085851 | A | 0.44 | 0.62  | 3.25E-01 | 3.12E-01 |
| 6 | rs3117035  | 33086249 | A | 0.45 | 0.55  | 3.85E-01 | 3.73E-01 |
| 6 | rs1883414  | 33086448 | T | 0.34 | 0.36  | 5.82E-01 | 6.43E-01 |
| 6 | rs9277682  | 33087684 | C | 0.20 | 0.26  | 7.40E-01 | 7.37E-01 |
| 6 | rs9277685  | 33088084 | A | 0.17 | -0.09 | 9.10E-01 | 9.00E-01 |
| 6 | rs4713607  | 33090836 | G | 0.48 | -0.52 | 4.14E-01 | 4.61E-01 |
| 6 | rs3129274  | 33094869 | G | 0.28 | -0.19 | 7.90E-01 | 8.01E-01 |
| 6 | rs3117016  | 33095516 | T | 0.42 | 0.31  | 6.27E-01 | 6.90E-01 |

|   |            |          |   |      |       |          |          |
|---|------------|----------|---|------|-------|----------|----------|
| 6 | rs3117008  | 33096274 | C | 0.48 | -0.61 | 3.34E-01 | 3.71E-01 |
| 6 | rs3117004  | 33096766 | C | 0.35 | 0.33  | 6.19E-01 | 6.18E-01 |
| 6 | rs3130237  | 33097561 | C | 0.18 | 0.43  | 6.02E-01 | 6.03E-01 |
| 6 | rs3129269  | 33097614 | T | 0.36 | 0.65  | 3.21E-01 | 3.62E-01 |
| 6 | rs6901221  | 33098276 | C | 0.18 | 0.53  | 5.24E-01 | 5.26E-01 |
| 6 | rs2294478  | 33098966 | T | 0.49 | 0.22  | 7.29E-01 | 6.64E-01 |
| 6 | rs2294472  | 33099210 | C | 0.40 | -0.24 | 7.16E-01 | 7.70E-01 |
| 6 | rs9366816  | 33104175 | C | 0.22 | -0.05 | 9.48E-01 | 9.94E-01 |
| 6 | rs13437000 | 33105064 | C | 0.19 | -0.49 | 5.54E-01 | 6.03E-01 |
| 6 | rs4713610  | 33107955 | G | 0.15 | 0.11  | 9.06E-01 | 8.56E-01 |
| 6 | rs7754200  | 33110933 | G | 0.26 | 0.23  | 7.55E-01 | 7.45E-01 |
| 6 | rs3129234  | 33111347 | A | 0.26 | 0.21  | 7.75E-01 | 7.66E-01 |
| 6 | rs3129223  | 33113197 | A | 0.26 | 0.25  | 7.30E-01 | 7.20E-01 |
| 6 | rs1003979  | 33114171 | A | 0.39 | 0.14  | 8.35E-01 | 9.03E-01 |
| 6 | rs2395365  | 33116222 | C | 0.44 | -0.22 | 7.32E-01 | 7.90E-01 |
| 6 | rs3129214  | 33117258 | A | 0.26 | 0.24  | 7.42E-01 | 7.32E-01 |
| 6 | rs721394   | 33117818 | A | 0.18 | -0.53 | 5.19E-01 | 5.76E-01 |
| 6 | rs756441   | 33122171 | C | 0.44 | -0.12 | 8.48E-01 | 9.08E-01 |
| 6 | rs756440   | 33122331 | C | 0.26 | 0.27  | 7.08E-01 | 6.99E-01 |
| 6 | rs9277912  | 33124658 | T | 0.17 | -0.01 | 9.93E-01 | 9.95E-01 |
| 6 | rs9277920  | 33125725 | A | 0.35 | 0.31  | 6.36E-01 | 6.85E-01 |
| 6 | rs4713614  | 33127987 | C | 0.44 | -0.20 | 7.55E-01 | 7.60E-01 |
| 6 | rs2235498  | 33130430 | T | 0.24 | -0.12 | 8.67E-01 | 7.94E-01 |
| 6 | rs986521   | 33136145 | C | 0.22 | 0.03  | 9.63E-01 | 9.47E-01 |
| 6 | rs2229784  | 33136310 | A | 0.03 | -1.40 | 4.42E-01 | 3.98E-01 |
| 6 | rs9368758  | 33138021 | A | 0.07 | -0.32 | 7.97E-01 | 7.77E-01 |
| 6 | rs1799910  | 33139328 | A | 0.48 | 0.05  | 9.30E-01 | 9.20E-01 |
| 6 | rs9277932  | 33141253 | T | 0.45 | 0.07  | 9.08E-01 | 9.34E-01 |
| 6 | rs2855430  | 33141280 | T | 0.16 | 0.24  | 7.81E-01 | 7.91E-01 |
| 6 | rs3762013  | 33142539 | G | 0.46 | 0.04  | 9.47E-01 | 9.75E-01 |
| 6 | rs2855425  | 33144373 | C | 0.26 | 0.18  | 8.09E-01 | 8.12E-01 |
| 6 | rs2855459  | 33154656 | T | 0.16 | 0.26  | 7.67E-01 | 7.77E-01 |
| 6 | rs2269346  | 33158898 | A | 0.07 | -0.18 | 8.88E-01 | 8.66E-01 |
| 6 | rs6531     | 33163451 | C | 0.26 | 0.16  | 8.20E-01 | 8.24E-01 |

|   |            |          |   |      |       |          |          |
|---|------------|----------|---|------|-------|----------|----------|
| 6 | rs439205   | 33173842 | T | 0.26 | -0.07 | 9.24E-01 | 8.86E-01 |
| 6 | rs421446   | 33174783 | C | 0.30 | 0.24  | 7.22E-01 | 7.61E-01 |
| 6 | rs2854028  | 33179689 | A | 0.24 | 0.44  | 5.59E-01 | 5.61E-01 |
| 6 | rs1704996  | 33182895 | G | 0.06 | 2.17  | 1.22E-01 | 1.29E-01 |
| 6 | rs213213   | 33183730 | A | 0.28 | 0.48  | 5.02E-01 | 5.01E-01 |
| 6 | rs9277937  | 33184894 | C | 0.10 | 0.26  | 8.05E-01 | 8.25E-01 |
| 6 | rs1977090  | 33185578 | A | 0.13 | 0.02  | 9.81E-01 | 9.50E-01 |
| 6 | rs213212   | 33185918 | G | 0.25 | 0.23  | 7.56E-01 | 7.53E-01 |
| 6 | rs213194   | 33195604 | A | 0.25 | -0.08 | 9.12E-01 | 9.15E-01 |
| 6 | rs213220   | 33202640 | C | 0.47 | 0.14  | 8.23E-01 | 7.96E-01 |
| 6 | rs213199   | 33235755 | T | 0.34 | 0.03  | 9.59E-01 | 9.31E-01 |
| 6 | rs464921   | 33240506 | C | 0.16 | -0.15 | 8.62E-01 | 9.26E-01 |
| 6 | rs213207   | 33241169 | G | 0.47 | 0.07  | 9.07E-01 | 8.74E-01 |
| 6 | rs455567   | 33252115 | C | 0.43 | 0.15  | 8.11E-01 | 8.99E-01 |
| 6 | rs14398    | 33254665 | G | 0.15 | -0.10 | 9.03E-01 | 9.57E-01 |
| 6 | rs9277965  | 33256397 | A | 0.18 | -0.26 | 7.50E-01 | 7.94E-01 |
| 6 | rs3130257  | 33256471 | T | 0.09 | 0.31  | 7.70E-01 | 7.67E-01 |
| 6 | rs456261   | 33258443 | C | 0.46 | 0.16  | 8.00E-01 | 8.65E-01 |
| 6 | rs12664430 | 33272677 | T | 0.07 | 0.82  | 5.00E-01 | 5.10E-01 |
| 6 | rs2282851  | 33280309 | T | 0.30 | 0.11  | 8.76E-01 | 8.39E-01 |
| 6 | rs3130100  | 33283766 | T | 0.44 | 0.19  | 7.70E-01 | 8.27E-01 |
| 6 | rs2239839  | 33288075 | T | 0.30 | 0.08  | 9.03E-01 | 8.65E-01 |
| 6 | rs3130267  | 33306794 | T | 0.44 | 0.38  | 5.56E-01 | 6.43E-01 |
| 6 | rs3130014  | 33312308 | C | 0.31 | 0.43  | 5.39E-01 | 6.43E-01 |
| 6 | rs211474   | 33320613 | T | 0.30 | 0.16  | 8.18E-01 | 8.91E-01 |
| 6 | rs3106192  | 33326250 | C | 0.43 | 0.38  | 5.63E-01 | 5.05E-01 |
| 6 | rs9278019  | 33326434 | T | 0.17 | -0.24 | 7.78E-01 | 7.90E-01 |
| 6 | rs211455   | 33328518 | T | 0.29 | 0.03  | 9.67E-01 | 9.53E-01 |
| 6 | rs211452   | 33330981 | C | 0.36 | 0.55  | 4.13E-01 | 4.57E-01 |
| 6 | rs3130276  | 33336930 | T | 0.35 | -0.26 | 6.95E-01 | 7.34E-01 |
| 6 | rs461964   | 33360574 | C | 0.36 | -0.04 | 9.49E-01 | 9.97E-01 |
| 6 | rs211457   | 33365640 | T | 0.09 | 0.58  | 5.93E-01 | 5.97E-01 |
| 6 | rs442745   | 33382241 | G | 0.35 | -0.11 | 8.75E-01 | 9.20E-01 |
| 6 | rs3116713  | 33382288 | G | 0.07 | 0.09  | 9.41E-01 | 9.36E-01 |

|   |           |          |   |      |       |          |          |
|---|-----------|----------|---|------|-------|----------|----------|
| 6 | rs211456  | 33389381 | A | 0.38 | 0.55  | 4.07E-01 | 4.47E-01 |
| 6 | rs2247385 | 33421577 | G | 0.39 | 0.44  | 5.04E-01 | 5.64E-01 |
| 6 | rs2772372 | 33427350 | T | 0.09 | -0.16 | 8.86E-01 | 9.05E-01 |

Results were obtained from the genotype data of the 1339 generalized vitiligo cases genotyped genome-wide. P values were calculated using linear regression analyses with vitiligo age-of-onset was coded as a quantitative trait; effect sizes are measured as additive effects, which correspond to the average change in phenotype when one major allele is replaced with one minor allele. PCA corrected p values were calculated using linear regression analyses including as covariates the three significant principal components for population structure obtained from EIGENSOFT.<sup>11</sup> SNP positions all refer to Genome Build GRCh37.



Supplementary Table 3. Association Analysis of MHC Region SNPs with Generalized Vitiligo Susceptibility

| Chr. | SNP        | Location | Minor  | Major |      |        | Odds Ratio | L95  | U95  | Trend p  | EIGENSTRAT p |
|------|------------|----------|--------|-------|------|--------|------------|------|------|----------|--------------|
|      |            | (nt)     | allele | F_A   | F_U  | allele |            |      |      |          |              |
| 6    | rs6910741  | 25895575 | C      | 0.15  | 0.15 | T      | 1.01       | 0.89 | 1.15 | 8.95E-01 | 8.18E-01     |
| 6    | rs7748167  | 25904652 | C      | 0.09  | 0.10 | A      | 0.82       | 0.70 | 0.97 | 1.74E-02 | 1.60E-02     |
| 6    | rs1865760  | 25916979 | T      | 0.41  | 0.39 | C      | 1.06       | 0.96 | 1.16 | 2.33E-01 | 1.56E-01     |
| 6    | rs7749342  | 25920265 | C      | 0.49  | 0.49 | T      | 0.99       | 0.91 | 1.09 | 8.98E-01 | 9.40E-01     |
| 6    | rs2071297  | 25924513 | G      | 0.41  | 0.39 | C      | 1.06       | 0.96 | 1.16 | 2.40E-01 | 1.60E-01     |
| 6    | rs7770139  | 25925823 | G      | 0.41  | 0.39 | A      | 1.06       | 0.96 | 1.16 | 2.51E-01 | 1.70E-01     |
| 6    | rs3734523  | 25925987 | T      | 0.08  | 0.10 | C      | 0.84       | 0.71 | 0.99 | 3.39E-02 | 3.09E-02     |
| 6    | rs10484431 | 25926674 | G      | 0.26  | 0.25 | A      | 1.04       | 0.94 | 1.16 | 4.69E-01 | 5.72E-01     |
| 6    | rs9295676  | 25928376 | T      | 0.04  | 0.04 | G      | 0.88       | 0.69 | 1.12 | 2.90E-01 | 3.31E-01     |
| 6    | rs199741   | 25931577 | A      | 0.23  | 0.23 | G      | 0.97       | 0.87 | 1.09 | 6.31E-01 | 6.09E-01     |
| 6    | rs6940007  | 25931957 | C      | 0.08  | 0.10 | A      | 0.84       | 0.71 | 0.99 | 3.72E-02 | 3.41E-02     |
| 6    | rs199736   | 25936787 | G      | 0.30  | 0.30 | A      | 0.97       | 0.87 | 1.07 | 5.02E-01 | 4.24E-01     |
| 6    | rs1436307  | 25939723 | A      | 0.41  | 0.40 | G      | 1.06       | 0.97 | 1.17 | 1.94E-01 | 1.30E-01     |
| 6    | rs7746105  | 25944278 | C      | 0.20  | 0.20 | A      | 1.03       | 0.92 | 1.16 | 5.92E-01 | 6.64E-01     |
| 6    | rs2051541  | 25945211 | C      | 0.50  | 0.50 | T      | 1.01       | 0.92 | 1.10 | 8.98E-01 | 7.43E-01     |
| 6    | rs6906576  | 25956501 | T      | 0.05  | 0.05 | C      | 1.04       | 0.84 | 1.27 | 7.45E-01 | 6.87E-01     |
| 6    | rs169219   | 25957392 | G      | 0.38  | 0.40 | T      | 0.92       | 0.83 | 1.01 | 7.62E-02 | 5.55E-02     |
| 6    | rs199738   | 25963456 | C      | 0.21  | 0.20 | T      | 1.04       | 0.92 | 1.16 | 5.55E-01 | 6.27E-01     |
| 6    | rs2009610  | 25967068 | A      | 0.24  | 0.24 | G      | 1.05       | 0.94 | 1.17 | 3.89E-01 | 2.92E-01     |
| 6    | rs2051538  | 25991620 | T      | 0.16  | 0.15 | C      | 1.09       | 0.96 | 1.23 | 1.87E-01 | 2.06E-01     |
| 6    | rs2013063  | 25994098 | A      | 0.44  | 0.44 | G      | 1.04       | 0.94 | 1.14 | 4.61E-01 | 3.59E-01     |
| 6    | rs12216125 | 25997458 | T      | 0.36  | 0.36 | C      | 1.02       | 0.93 | 1.13 | 6.42E-01 | 5.28E-01     |
| 6    | rs10484432 | 26008876 | A      | 0.24  | 0.23 | G      | 1.06       | 0.95 | 1.18 | 2.83E-01 | 1.99E-01     |
| 6    | rs199750   | 26016462 | C      | 0.29  | 0.30 | T      | 0.96       | 0.87 | 1.07 | 4.72E-01 | 4.23E-01     |
| 6    | rs2237231  | 26017171 | A      | 0.07  | 0.07 | G      | 1.03       | 0.87 | 1.23 | 7.14E-01 | 6.83E-01     |
| 6    | rs16891235 | 26017542 | C      | 0.09  | 0.10 | T      | 0.84       | 0.71 | 0.98 | 2.53E-02 | 1.91E-02     |
| 6    | rs9379818  | 26023206 | T      | 0.42  | 0.42 | G      | 1.04       | 0.94 | 1.14 | 4.56E-01 | 3.50E-01     |
| 6    | rs10484434 | 26031613 | A      | 0.15  | 0.14 | G      | 1.09       | 0.95 | 1.23 | 2.16E-01 | 2.25E-01     |
| 6    | rs2213284  | 26031868 | C      | 0.31  | 0.31 | T      | 0.98       | 0.89 | 1.08 | 6.64E-01 | 6.00E-01     |
| 6    | rs2230655  | 26033506 | C      | 0.31  | 0.31 | T      | 0.97       | 0.88 | 1.07 | 5.86E-01 | 5.24E-01     |
| 6    | rs1540275  | 26036476 | A      | 0.31  | 0.31 | G      | 0.98       | 0.89 | 1.08 | 6.96E-01 | 6.32E-01     |

|   |            |          |   |      |      |   |      |      |      |          |          |
|---|------------|----------|---|------|------|---|------|------|------|----------|----------|
| 6 | rs2032447  | 26044369 | T | 0.32 | 0.33 | C | 0.99 | 0.90 | 1.09 | 8.49E-01 | 7.83E-01 |
| 6 | rs9689245  | 26050845 | T | 0.14 | 0.12 | C | 1.11 | 0.97 | 1.27 | 1.29E-01 | 1.49E-01 |
| 6 | rs9295684  | 26069669 | C | 0.42 | 0.42 | T | 1.04 | 0.94 | 1.14 | 4.40E-01 | 3.37E-01 |
| 6 | rs2794719  | 26088890 | C | 0.42 | 0.41 | A | 1.03 | 0.94 | 1.13 | 5.42E-01 | 4.28E-01 |
| 6 | rs9366637  | 26089098 | T | 0.06 | 0.06 | C | 1.05 | 0.86 | 1.27 | 6.46E-01 | 6.52E-01 |
| 6 | rs1800562  | 26093141 | A | 0.07 | 0.07 | G | 0.94 | 0.78 | 1.13 | 4.98E-01 | 6.44E-01 |
| 6 | rs1572982  | 26094367 | A | 0.46 | 0.46 | G | 1.00 | 0.91 | 1.09 | 9.42E-01 | 8.70E-01 |
| 6 | rs707889   | 26095931 | T | 0.23 | 0.23 | C | 1.03 | 0.93 | 1.15 | 5.57E-01 | 4.11E-01 |
| 6 | rs17596719 | 26097194 | A | 0.13 | 0.12 | G | 1.11 | 0.97 | 1.28 | 1.27E-01 | 1.31E-01 |
| 6 | rs6918586  | 26097384 | C | 0.40 | 0.41 | T | 0.98 | 0.90 | 1.08 | 6.97E-01 | 6.12E-01 |
| 6 | rs1543680  | 26103177 | A | 0.23 | 0.22 | G | 1.04 | 0.93 | 1.16 | 5.18E-01 | 3.81E-01 |
| 6 | rs198853   | 26104096 | C | 0.31 | 0.31 | T | 0.98 | 0.89 | 1.08 | 6.73E-01 | 5.98E-01 |
| 6 | rs198845   | 26107790 | T | 0.37 | 0.38 | G | 0.96 | 0.87 | 1.05 | 3.40E-01 | 3.40E-01 |
| 6 | rs2051542  | 26108168 | T | 0.06 | 0.06 | C | 1.06 | 0.88 | 1.29 | 5.23E-01 | 4.91E-01 |
| 6 | rs16891315 | 26111756 | C | 0.09 | 0.11 | T | 0.86 | 0.73 | 1.00 | 4.81E-02 | 3.61E-02 |
| 6 | rs933199   | 26112893 | G | 0.06 | 0.06 | A | 1.06 | 0.88 | 1.29 | 5.18E-01 | 4.92E-01 |
| 6 | rs198838   | 26113340 | A | 0.46 | 0.46 | G | 1.00 | 0.91 | 1.10 | 9.84E-01 | 9.44E-01 |
| 6 | rs198834   | 26114372 | A | 0.37 | 0.38 | G | 0.96 | 0.87 | 1.05 | 3.55E-01 | 3.55E-01 |
| 6 | rs707896   | 26116424 | A | 0.17 | 0.16 | G | 1.08 | 0.96 | 1.22 | 2.19E-01 | 1.72E-01 |
| 6 | rs198828   | 26119459 | G | 0.46 | 0.46 | A | 1.00 | 0.92 | 1.10 | 9.60E-01 | 9.84E-01 |
| 6 | rs16891334 | 26124303 | C | 0.09 | 0.11 | T | 0.87 | 0.75 | 1.02 | 9.09E-02 | 7.21E-02 |
| 6 | rs129128   | 26125342 | G | 0.13 | 0.14 | A | 0.94 | 0.83 | 1.08 | 4.01E-01 | 4.21E-01 |
| 6 | rs17531978 | 26129392 | C | 0.15 | 0.13 | T | 1.13 | 0.99 | 1.29 | 7.37E-02 | 8.78E-02 |
| 6 | rs707899   | 26129948 | T | 0.17 | 0.16 | C | 1.07 | 0.95 | 1.21 | 2.90E-01 | 2.41E-01 |
| 6 | rs198806   | 26133616 | A | 0.39 | 0.40 | G | 0.99 | 0.90 | 1.09 | 8.51E-01 | 7.77E-01 |
| 6 | rs2856646  | 26135498 | T | 0.29 | 0.28 | C | 1.04 | 0.94 | 1.15 | 4.14E-01 | 4.42E-01 |
| 6 | rs7760713  | 26137652 | G | 0.06 | 0.06 | A | 1.03 | 0.86 | 1.25 | 7.40E-01 | 7.02E-01 |
| 6 | rs806970   | 26141375 | T | 0.07 | 0.07 | C | 1.10 | 0.92 | 1.31 | 3.10E-01 | 2.62E-01 |
| 6 | rs806972   | 26148311 | G | 0.01 | 0.01 | T | 0.96 | 0.65 | 1.41 | 8.22E-01 | 6.95E-01 |
| 6 | rs806973   | 26148326 | G | 0.38 | 0.38 | A | 1.01 | 0.92 | 1.11 | 7.73E-01 | 7.53E-01 |
| 6 | rs16891359 | 26149000 | C | 0.04 | 0.04 | T | 0.99 | 0.79 | 1.24 | 9.16E-01 | 9.48E-01 |
| 6 | rs9379827  | 26153335 | A | 0.26 | 0.23 | C | 1.14 | 1.03 | 1.27 | 1.48E-02 | 1.07E-02 |
| 6 | rs3857546  | 26157762 | T | 0.11 | 0.13 | C | 0.83 | 0.72 | 0.96 | 1.35E-02 | 1.13E-02 |
| 6 | rs1009181  | 26158993 | G | 0.37 | 0.36 | A | 1.02 | 0.93 | 1.12 | 7.23E-01 | 6.80E-01 |

|   |            |          |   |      |      |   |      |      |      |          |          |
|---|------------|----------|---|------|------|---|------|------|------|----------|----------|
| 6 | rs9379829  | 26172219 | T | 0.25 | 0.22 | C | 1.13 | 1.02 | 1.26 | 2.33E-02 | 1.66E-02 |
| 6 | rs9379831  | 26175852 | A | 0.34 | 0.32 | C | 1.12 | 1.01 | 1.23 | 2.59E-02 | 2.32E-02 |
| 6 | rs4496782  | 26184617 | C | 0.23 | 0.22 | T | 1.02 | 0.91 | 1.14 | 7.45E-01 | 8.22E-01 |
| 6 | rs11751812 | 26187334 | T | 0.09 | 0.09 | G | 0.99 | 0.85 | 1.16 | 9.20E-01 | 8.39E-01 |
| 6 | rs806977   | 26189615 | A | 0.48 | 0.50 | G | 0.90 | 0.82 | 0.99 | 3.37E-02 | 3.78E-02 |
| 6 | rs11753837 | 26190747 | A | 0.10 | 0.10 | G | 0.99 | 0.84 | 1.15 | 8.58E-01 | 7.78E-01 |
| 6 | rs1341758  | 26200518 | T | 0.05 | 0.05 | C | 1.10 | 0.89 | 1.36 | 3.89E-01 | 3.73E-01 |
| 6 | rs3757135  | 26200707 | A | 0.15 | 0.14 | G | 1.02 | 0.90 | 1.17 | 7.33E-01 | 7.84E-01 |
| 6 | rs2069018  | 26205718 | G | 0.15 | 0.15 | A | 1.01 | 0.89 | 1.15 | 8.69E-01 | 9.33E-01 |
| 6 | rs989710   | 26206074 | T | 0.05 | 0.05 | G | 1.07 | 0.87 | 1.31 | 5.50E-01 | 5.45E-01 |
| 6 | rs2022448  | 26207928 | A | 0.15 | 0.15 | G | 1.02 | 0.89 | 1.16 | 8.13E-01 | 8.77E-01 |
| 6 | rs11755943 | 26211368 | G | 0.15 | 0.14 | A | 1.05 | 0.92 | 1.19 | 4.94E-01 | 5.66E-01 |
| 6 | rs11753131 | 26219384 | A | 0.15 | 0.14 | G | 1.05 | 0.92 | 1.20 | 4.46E-01 | 5.16E-01 |
| 6 | rs11754368 | 26221173 | A | 0.09 | 0.09 | G | 1.04 | 0.88 | 1.22 | 6.68E-01 | 7.73E-01 |
| 6 | rs11757549 | 26231608 | A | 0.09 | 0.09 | G | 1.04 | 0.88 | 1.22 | 6.37E-01 | 7.37E-01 |
| 6 | rs10946808 | 26233387 | G | 0.30 | 0.28 | A | 1.08 | 0.98 | 1.19 | 1.31E-01 | 1.10E-01 |
| 6 | rs16891458 | 26234476 | C | 0.05 | 0.05 | A | 1.13 | 0.91 | 1.39 | 2.67E-01 | 2.70E-01 |
| 6 | rs9358913  | 26239404 | G | 0.28 | 0.27 | A | 1.05 | 0.95 | 1.16 | 3.56E-01 | 3.11E-01 |
| 6 | rs3734533  | 26240624 | G | 0.18 | 0.18 | A | 1.03 | 0.92 | 1.16 | 6.27E-01 | 6.91E-01 |
| 6 | rs1000308  | 26244580 | A | 0.05 | 0.05 | G | 1.10 | 0.89 | 1.36 | 4.00E-01 | 4.11E-01 |
| 6 | rs6913828  | 26246664 | T | 0.06 | 0.05 | C | 1.03 | 0.84 | 1.26 | 7.86E-01 | 7.92E-01 |
| 6 | rs11753610 | 26251601 | C | 0.13 | 0.13 | T | 1.04 | 0.91 | 1.19 | 5.48E-01 | 5.93E-01 |
| 6 | rs6935954  | 26255451 | A | 0.41 | 0.41 | G | 0.98 | 0.90 | 1.08 | 7.43E-01 | 8.15E-01 |
| 6 | rs7773163  | 26267800 | T | 0.16 | 0.16 | C | 0.95 | 0.83 | 1.07 | 3.80E-01 | 3.03E-01 |
| 6 | rs9393692  | 26276650 | A | 0.43 | 0.44 | G | 0.94 | 0.86 | 1.03 | 1.82E-01 | 2.08E-01 |
| 6 | rs6939589  | 26289203 | T | 0.44 | 0.46 | C | 0.94 | 0.85 | 1.03 | 1.74E-01 | 1.83E-01 |
| 6 | rs9379844  | 26291527 | A | 0.40 | 0.38 | G | 1.10 | 1.00 | 1.21 | 4.91E-02 | 4.04E-02 |
| 6 | rs1883214  | 26306684 | A | 0.18 | 0.18 | C | 1.02 | 0.90 | 1.14 | 8.10E-01 | 8.29E-01 |
| 6 | rs6923139  | 26313348 | T | 0.08 | 0.10 | C | 0.83 | 0.70 | 0.97 | 2.32E-02 | 1.90E-02 |
| 6 | rs6903015  | 26322526 | G | 0.08 | 0.10 | A | 0.83 | 0.70 | 0.97 | 2.32E-02 | 1.89E-02 |
| 6 | rs11754384 | 26322985 | G | 0.15 | 0.15 | T | 0.96 | 0.84 | 1.09 | 5.45E-01 | 4.71E-01 |
| 6 | rs3778279  | 26325463 | C | 0.44 | 0.44 | T | 1.00 | 0.91 | 1.10 | 9.93E-01 | 9.75E-01 |
| 6 | rs2179152  | 26325888 | T | 0.37 | 0.38 | C | 0.99 | 0.90 | 1.09 | 8.70E-01 | 9.08E-01 |
| 6 | rs6939048  | 26327953 | G | 0.37 | 0.38 | A | 0.99 | 0.90 | 1.09 | 8.61E-01 | 8.96E-01 |

|   |            |          |   |      |      |   |      |      |      |          |          |
|---|------------|----------|---|------|------|---|------|------|------|----------|----------|
| 6 | rs9358927  | 26330492 | G | 0.40 | 0.38 | T | 1.10 | 1.00 | 1.21 | 4.18E-02 | 3.35E-02 |
| 6 | rs2893842  | 26338434 | G | 0.32 | 0.32 | T | 1.04 | 0.94 | 1.14 | 4.86E-01 | 4.52E-01 |
| 6 | rs9358929  | 26341062 | A | 0.19 | 0.18 | G | 1.04 | 0.92 | 1.17 | 5.28E-01 | 5.97E-01 |
| 6 | rs9467715  | 26341301 | C | 0.28 | 0.28 | T | 1.02 | 0.92 | 1.13 | 7.43E-01 | 6.75E-01 |
| 6 | rs9461245  | 26354572 | A | 0.12 | 0.11 | G | 1.05 | 0.90 | 1.21 | 5.56E-01 | 5.08E-01 |
| 6 | rs6933583  | 26355283 | C | 0.26 | 0.27 | A | 0.97 | 0.88 | 1.08 | 6.26E-01 | 7.17E-01 |
| 6 | rs4712981  | 26361430 | T | 0.26 | 0.27 | C | 0.97 | 0.87 | 1.08 | 5.68E-01 | 6.55E-01 |
| 6 | rs12199613 | 26367218 | T | 0.36 | 0.36 | C | 1.02 | 0.92 | 1.12 | 7.37E-01 | 6.56E-01 |
| 6 | rs9379859  | 26369549 | T | 0.09 | 0.11 | C | 0.86 | 0.74 | 1.00 | 5.16E-02 | 5.89E-02 |
| 6 | rs10946818 | 26371006 | A | 0.15 | 0.15 | G | 1.00 | 0.88 | 1.13 | 9.89E-01 | 9.00E-01 |
| 6 | rs12176317 | 26372786 | G | 0.09 | 0.11 | A | 0.87 | 0.75 | 1.02 | 7.85E-02 | 8.67E-02 |
| 6 | rs9379870  | 26374410 | G | 0.26 | 0.27 | A | 0.97 | 0.87 | 1.08 | 5.78E-01 | 6.57E-01 |
| 6 | rs13218591 | 26376832 | C | 0.27 | 0.28 | T | 0.96 | 0.86 | 1.06 | 4.12E-01 | 4.84E-01 |
| 6 | rs9461249  | 26383386 | C | 0.10 | 0.10 | T | 1.07 | 0.92 | 1.24 | 4.08E-01 | 4.33E-01 |
| 6 | rs1796518  | 26388672 | T | 0.35 | 0.36 | C | 0.95 | 0.86 | 1.04 | 2.58E-01 | 2.68E-01 |
| 6 | rs7756881  | 26389926 | T | 0.19 | 0.17 | C | 1.08 | 0.96 | 1.21 | 2.15E-01 | 2.18E-01 |
| 6 | rs7356849  | 26396739 | C | 0.14 | 0.14 | T | 1.00 | 0.87 | 1.14 | 9.67E-01 | 9.92E-01 |
| 6 | rs4712988  | 26399796 | G | 0.12 | 0.12 | A | 1.04 | 0.90 | 1.20 | 6.11E-01 | 5.48E-01 |
| 6 | rs1741738  | 26401252 | G | 0.14 | 0.15 | A | 0.97 | 0.85 | 1.10 | 5.99E-01 | 5.59E-01 |
| 6 | rs1796520  | 26410800 | C | 0.48 | 0.48 | T | 1.00 | 0.91 | 1.10 | 9.91E-01 | 9.86E-01 |
| 6 | rs6900725  | 26413088 | C | 0.16 | 0.15 | T | 1.08 | 0.96 | 1.23 | 2.08E-01 | 1.72E-01 |
| 6 | rs4712990  | 26413744 | A | 0.11 | 0.11 | C | 1.00 | 0.87 | 1.16 | 9.61E-01 | 9.18E-01 |
| 6 | rs4320356  | 26423560 | T | 0.41 | 0.40 | C | 1.02 | 0.93 | 1.12 | 6.08E-01 | 5.71E-01 |
| 6 | rs10946829 | 26426487 | A | 0.16 | 0.15 | G | 1.09 | 0.96 | 1.23 | 2.00E-01 | 1.66E-01 |
| 6 | rs1741740  | 26428842 | A | 0.16 | 0.17 | G | 0.94 | 0.83 | 1.06 | 2.93E-01 | 2.68E-01 |
| 6 | rs2893848  | 26430981 | G | 0.16 | 0.15 | A | 1.09 | 0.96 | 1.24 | 1.76E-01 | 1.46E-01 |
| 6 | rs1624440  | 26433329 | G | 0.49 | 0.49 | A | 1.00 | 0.91 | 1.09 | 9.68E-01 | 9.71E-01 |
| 6 | rs12208390 | 26437106 | T | 0.10 | 0.09 | C | 1.09 | 0.93 | 1.27 | 2.81E-01 | 2.74E-01 |
| 6 | rs2281027  | 26446705 | C | 0.02 | 0.02 | T | 0.85 | 0.62 | 1.17 | 3.20E-01 | 2.85E-01 |
| 6 | rs2237236  | 26451553 | G | 0.41 | 0.40 | A | 1.02 | 0.93 | 1.12 | 7.08E-01 | 6.65E-01 |
| 6 | rs9295690  | 26456069 | C | 0.20 | 0.18 | A | 1.15 | 1.02 | 1.29 | 1.85E-02 | 1.77E-02 |
| 6 | rs13195509 | 26463660 | A | 0.07 | 0.09 | G | 0.78 | 0.66 | 0.93 | 4.80E-03 | 5.05E-03 |
| 6 | rs3799380  | 26467182 | C | 0.18 | 0.18 | T | 0.96 | 0.86 | 1.09 | 5.43E-01 | 5.70E-01 |
| 6 | rs6927012  | 26471992 | A | 0.10 | 0.11 | G | 0.95 | 0.82 | 1.11 | 5.33E-01 | 4.75E-01 |

|   |            |          |   |      |      |   |      |      |      |          |          |
|---|------------|----------|---|------|------|---|------|------|------|----------|----------|
| 6 | rs7763910  | 26472655 | A | 0.40 | 0.40 | G | 0.99 | 0.90 | 1.08 | 7.93E-01 | 7.52E-01 |
| 6 | rs1407045  | 26476155 | A | 0.50 | 0.50 | G | 1.01 | 0.92 | 1.11 | 8.10E-01 | 8.49E-01 |
| 6 | rs12208272 | 26477640 | A | 0.10 | 0.10 | G | 1.07 | 0.92 | 1.25 | 3.84E-01 | 3.82E-01 |
| 6 | rs9358946  | 26478927 | A | 0.16 | 0.17 | G | 0.98 | 0.87 | 1.11 | 7.93E-01 | 8.34E-01 |
| 6 | rs16891725 | 26479150 | T | 0.10 | 0.11 | C | 0.89 | 0.77 | 1.04 | 1.45E-01 | 1.58E-01 |
| 6 | rs9357008  | 26479891 | G | 0.22 | 0.22 | T | 1.02 | 0.91 | 1.14 | 6.99E-01 | 7.66E-01 |
| 6 | rs7756567  | 26481642 | G | 0.16 | 0.17 | T | 0.98 | 0.87 | 1.11 | 7.76E-01 | 8.19E-01 |
| 6 | rs6456730  | 26484376 | C | 0.01 | 0.02 | T | 0.77 | 0.52 | 1.15 | 2.05E-01 | 1.80E-01 |
| 6 | rs2093169  | 26495099 | T | 0.16 | 0.17 | C | 0.98 | 0.87 | 1.11 | 7.81E-01 | 8.24E-01 |
| 6 | rs13194984 | 26500563 | T | 0.13 | 0.14 | G | 0.95 | 0.83 | 1.08 | 4.13E-01 | 4.25E-01 |
| 6 | rs3736780  | 26505135 | C | 0.10 | 0.11 | T | 0.93 | 0.80 | 1.08 | 3.17E-01 | 2.92E-01 |
| 6 | rs3736781  | 26505362 | A | 0.48 | 0.48 | G | 0.97 | 0.88 | 1.06 | 5.07E-01 | 5.20E-01 |
| 6 | rs6911330  | 26524313 | G | 0.10 | 0.11 | A | 0.94 | 0.81 | 1.09 | 4.34E-01 | 4.10E-01 |
| 6 | rs15580    | 26546048 | C | 0.10 | 0.11 | T | 0.92 | 0.80 | 1.07 | 3.03E-01 | 2.84E-01 |
| 6 | rs9379892  | 26582414 | G | 0.21 | 0.21 | A | 1.00 | 0.90 | 1.12 | 9.51E-01 | 9.82E-01 |
| 6 | rs9379895  | 26592707 | G | 0.20 | 0.19 | A | 1.02 | 0.90 | 1.14 | 8.00E-01 | 7.78E-01 |
| 6 | rs12204145 | 26600156 | A | 0.10 | 0.09 | G | 1.10 | 0.94 | 1.28 | 2.40E-01 | 2.44E-01 |
| 6 | rs9379897  | 26601526 | C | 0.09 | 0.10 | T | 0.90 | 0.77 | 1.05 | 1.72E-01 | 1.80E-01 |
| 6 | rs12205310 | 26605864 | T | 0.14 | 0.15 | G | 0.93 | 0.81 | 1.06 | 2.46E-01 | 2.65E-01 |
| 6 | rs6919391  | 26608325 | G | 0.37 | 0.37 | A | 1.00 | 0.91 | 1.10 | 9.48E-01 | 9.63E-01 |
| 6 | rs6911476  | 26612363 | T | 0.01 | 0.01 | C | 0.83 | 0.52 | 1.32 | 4.34E-01 | 4.13E-01 |
| 6 | rs2451731  | 26624822 | G | 0.43 | 0.43 | T | 0.99 | 0.90 | 1.08 | 7.87E-01 | 7.82E-01 |
| 6 | rs2451741  | 26629404 | G | 0.43 | 0.43 | A | 0.99 | 0.90 | 1.08 | 8.11E-01 | 8.07E-01 |
| 6 | rs2451753  | 26649018 | C | 0.38 | 0.37 | T | 1.01 | 0.92 | 1.11 | 8.97E-01 | 9.19E-01 |
| 6 | rs2494711  | 26649421 | T | 0.38 | 0.37 | C | 1.01 | 0.92 | 1.11 | 8.93E-01 | 9.18E-01 |
| 6 | rs12201890 | 26662626 | C | 0.10 | 0.09 | A | 1.10 | 0.95 | 1.28 | 2.14E-01 | 2.17E-01 |
| 6 | rs7740197  | 26663478 | G | 0.19 | 0.19 | A | 1.00 | 0.89 | 1.13 | 9.61E-01 | 9.28E-01 |
| 6 | rs6901497  | 26700509 | A | 0.06 | 0.05 | G | 1.27 | 1.05 | 1.54 | 1.62E-02 | 1.59E-02 |
| 6 | rs2498399  | 26706544 | C | 0.41 | 0.42 | T | 0.96 | 0.88 | 1.06 | 4.49E-01 | 4.50E-01 |
| 6 | rs9467847  | 26709591 | C | 0.27 | 0.27 | T | 1.01 | 0.91 | 1.12 | 8.55E-01 | 8.13E-01 |
| 6 | rs3004047  | 26710391 | A | 0.14 | 0.14 | G | 1.05 | 0.92 | 1.20 | 4.85E-01 | 5.86E-01 |
| 6 | rs4711122  | 26758479 | T | 0.26 | 0.25 | C | 1.03 | 0.92 | 1.14 | 6.25E-01 | 5.83E-01 |
| 6 | rs9348738  | 26922906 | C | 0.12 | 0.11 | T | 1.04 | 0.90 | 1.20 | 6.14E-01 | 6.45E-01 |
| 6 | rs9393777  | 26942027 | C | 0.12 | 0.13 | T | 0.95 | 0.83 | 1.09 | 4.68E-01 | 5.34E-01 |

|   |            |          |   |      |      |   |      |      |      |          |          |
|---|------------|----------|---|------|------|---|------|------|------|----------|----------|
| 6 | rs10946888 | 26951678 | T | 0.42 | 0.41 | C | 1.05 | 0.95 | 1.15 | 3.53E-01 | 3.64E-01 |
| 6 | rs7741445  | 26988992 | T | 0.10 | 0.10 | G | 1.01 | 0.87 | 1.18 | 8.99E-01 | 9.72E-01 |
| 6 | rs4358615  | 26998567 | A | 0.32 | 0.32 | G | 1.01 | 0.91 | 1.11 | 8.56E-01 | 8.65E-01 |
| 6 | rs4541737  | 27002821 | T | 0.09 | 0.08 | C | 1.15 | 0.98 | 1.35 | 8.82E-02 | 9.33E-02 |
| 6 | rs12527111 | 27006475 | C | 0.42 | 0.41 | T | 1.05 | 0.96 | 1.15 | 2.94E-01 | 3.00E-01 |
| 6 | rs12190473 | 27024687 | T | 0.19 | 0.20 | C | 0.93 | 0.82 | 1.04 | 1.93E-01 | 1.79E-01 |
| 6 | rs6916301  | 27042258 | T | 0.13 | 0.10 | C | 1.25 | 1.08 | 1.44 | 2.44E-03 | 1.97E-03 |
| 6 | rs6904071  | 27047256 | A | 0.15 | 0.16 | G | 0.95 | 0.84 | 1.08 | 4.43E-01 | 4.69E-01 |
| 6 | rs994690   | 27047916 | G | 0.02 | 0.02 | A | 1.35 | 0.97 | 1.88 | 7.62E-02 | 9.06E-02 |
| 6 | rs9368488  | 27052536 | G | 0.02 | 0.01 | A | 1.78 | 1.20 | 2.65 | 3.66E-03 | 5.08E-03 |
| 6 | rs6921388  | 27080205 | G | 0.31 | 0.30 | A | 1.04 | 0.94 | 1.15 | 4.19E-01 | 4.06E-01 |
| 6 | rs2393915  | 27080460 | C | 0.49 | 0.49 | A | 1.02 | 0.93 | 1.12 | 6.57E-01 | 6.87E-01 |
| 6 | rs7745603  | 27090404 | T | 0.21 | 0.21 | C | 0.99 | 0.89 | 1.11 | 9.08E-01 | 9.63E-01 |
| 6 | rs6913660  | 27091425 | A | 0.15 | 0.16 | C | 0.95 | 0.84 | 1.08 | 4.19E-01 | 4.44E-01 |
| 6 | rs1321578  | 27104783 | C | 0.04 | 0.04 | A | 1.02 | 0.81 | 1.29 | 8.54E-01 | 8.66E-01 |
| 6 | rs12193820 | 27113811 | G | 0.09 | 0.08 | A | 1.13 | 0.96 | 1.32 | 1.45E-01 | 1.54E-01 |
| 6 | rs9295730  | 27128806 | C | 0.31 | 0.30 | T | 1.05 | 0.95 | 1.16 | 3.65E-01 | 3.60E-01 |
| 6 | rs1028308  | 27129757 | T | 0.31 | 0.30 | C | 1.05 | 0.95 | 1.16 | 3.43E-01 | 3.39E-01 |
| 6 | rs858972   | 27154361 | A | 0.19 | 0.18 | G | 1.12 | 0.99 | 1.26 | 6.15E-02 | 7.34E-02 |
| 6 | rs1102563  | 27160095 | A | 0.25 | 0.24 | G | 1.10 | 0.98 | 1.22 | 9.62E-02 | 1.08E-01 |
| 6 | rs7755577  | 27171437 | C | 0.12 | 0.11 | T | 1.06 | 0.92 | 1.22 | 4.50E-01 | 5.08E-01 |
| 6 | rs12210982 | 27174235 | T | 0.06 | 0.06 | C | 0.91 | 0.75 | 1.10 | 3.33E-01 | 3.43E-01 |
| 6 | rs858985   | 27178028 | A | 0.10 | 0.09 | G | 1.16 | 0.99 | 1.35 | 6.30E-02 | 6.24E-02 |
| 6 | rs12153912 | 27179829 | A | 0.09 | 0.08 | G | 1.14 | 0.97 | 1.34 | 1.19E-01 | 1.28E-01 |
| 6 | rs13219354 | 27185664 | C | 0.09 | 0.11 | T | 0.80 | 0.68 | 0.93 | 3.97E-03 | 3.62E-03 |
| 6 | rs1156086  | 27187355 | G | 0.27 | 0.26 | A | 1.06 | 0.96 | 1.18 | 2.65E-01 | 2.83E-01 |
| 6 | rs996247   | 27193095 | A | 0.27 | 0.26 | G | 1.07 | 0.96 | 1.19 | 2.15E-01 | 2.29E-01 |
| 6 | rs6918423  | 27194072 | G | 0.17 | 0.17 | T | 1.00 | 0.89 | 1.13 | 9.55E-01 | 1.00E+00 |
| 6 | rs3800312  | 27210614 | A | 0.17 | 0.17 | C | 1.01 | 0.89 | 1.14 | 9.19E-01 | 9.56E-01 |
| 6 | rs9393796  | 27226965 | G | 0.10 | 0.10 | T | 1.11 | 0.95 | 1.28 | 1.93E-01 | 2.31E-01 |
| 6 | rs11758636 | 27229561 | A | 0.05 | 0.05 | G | 0.97 | 0.79 | 1.19 | 7.63E-01 | 8.41E-01 |
| 6 | rs9295732  | 27230815 | C | 0.02 | 0.02 | T | 0.94 | 0.68 | 1.29 | 6.81E-01 | 6.01E-01 |
| 6 | rs6915678  | 27235866 | G | 0.33 | 0.34 | T | 0.98 | 0.89 | 1.08 | 6.54E-01 | 6.44E-01 |
| 6 | rs17687319 | 27238000 | C | 0.08 | 0.08 | T | 1.01 | 0.85 | 1.20 | 9.16E-01 | 8.94E-01 |

|   |            |          |   |      |      |   |      |      |      |          |          |
|---|------------|----------|---|------|------|---|------|------|------|----------|----------|
| 6 | rs6917419  | 27243480 | T | 0.11 | 0.10 | C | 1.10 | 0.94 | 1.27 | 2.29E-01 | 2.66E-01 |
| 6 | rs9379968  | 27244590 | A | 0.46 | 0.46 | G | 1.01 | 0.92 | 1.11 | 7.92E-01 | 8.03E-01 |
| 6 | rs6932590  | 27248931 | C | 0.23 | 0.24 | T | 0.93 | 0.83 | 1.03 | 1.74E-01 | 1.98E-01 |
| 6 | rs7746199  | 27261324 | T | 0.15 | 0.17 | C | 0.86 | 0.76 | 0.97 | 1.70E-02 | 1.46E-02 |
| 6 | rs7771953  | 27271343 | A | 0.41 | 0.42 | G | 0.95 | 0.86 | 1.04 | 2.55E-01 | 2.39E-01 |
| 6 | rs9379976  | 27298200 | C | 0.24 | 0.23 | T | 1.05 | 0.94 | 1.17 | 3.66E-01 | 3.85E-01 |
| 6 | rs9379977  | 27298279 | C | 0.24 | 0.23 | T | 1.06 | 0.95 | 1.18 | 3.22E-01 | 3.39E-01 |
| 6 | rs721600   | 27298905 | A | 0.25 | 0.23 | G | 1.08 | 0.97 | 1.21 | 1.52E-01 | 1.66E-01 |
| 6 | rs1156457  | 27300580 | C | 0.13 | 0.14 | T | 0.90 | 0.79 | 1.04 | 1.46E-01 | 1.44E-01 |
| 6 | rs9461362  | 27303927 | T | 0.16 | 0.16 | C | 1.03 | 0.91 | 1.17 | 6.43E-01 | 6.49E-01 |
| 6 | rs9461366  | 27310533 | A | 0.40 | 0.38 | G | 1.08 | 0.98 | 1.19 | 1.05E-01 | 9.48E-02 |
| 6 | rs1011665  | 27332298 | G | 0.45 | 0.43 | A | 1.10 | 1.00 | 1.21 | 4.27E-02 | 3.71E-02 |
| 6 | rs6914864  | 27336489 | T | 0.36 | 0.36 | C | 0.98 | 0.89 | 1.08 | 6.65E-01 | 7.00E-01 |
| 6 | rs9468076  | 27338890 | T | 0.21 | 0.19 | C | 1.10 | 0.98 | 1.23 | 1.11E-01 | 1.26E-01 |
| 6 | rs1883403  | 27350329 | G | 0.46 | 0.43 | A | 1.11 | 1.01 | 1.22 | 2.53E-02 | 2.16E-02 |
| 6 | rs2143062  | 27353852 | A | 0.23 | 0.22 | G | 1.05 | 0.94 | 1.18 | 3.63E-01 | 3.03E-01 |
| 6 | rs13220817 | 27356527 | T | 0.46 | 0.43 | C | 1.11 | 1.01 | 1.22 | 2.73E-02 | 2.41E-02 |
| 6 | rs10807020 | 27356902 | A | 0.25 | 0.24 | G | 1.07 | 0.96 | 1.19 | 2.26E-01 | 1.79E-01 |
| 6 | rs10807021 | 27356925 | T | 0.25 | 0.24 | G | 1.07 | 0.96 | 1.19 | 2.08E-01 | 1.65E-01 |
| 6 | rs2206251  | 27358392 | C | 0.25 | 0.24 | T | 1.07 | 0.96 | 1.19 | 2.29E-01 | 1.81E-01 |
| 6 | rs2076305  | 27375611 | T | 0.31 | 0.32 | G | 0.97 | 0.88 | 1.08 | 6.11E-01 | 6.98E-01 |
| 6 | rs6938943  | 27376910 | G | 0.36 | 0.37 | A | 0.95 | 0.86 | 1.04 | 2.75E-01 | 3.18E-01 |
| 6 | rs7744655  | 27384069 | A | 0.01 | 0.01 | G | 0.70 | 0.45 | 1.08 | 1.06E-01 | 1.01E-01 |
| 6 | rs6456785  | 27390399 | T | 0.43 | 0.43 | G | 0.99 | 0.90 | 1.08 | 8.00E-01 | 8.22E-01 |
| 6 | rs6926142  | 27395764 | T | 0.44 | 0.45 | C | 0.97 | 0.89 | 1.07 | 5.36E-01 | 5.53E-01 |
| 6 | rs1569566  | 27400031 | G | 0.35 | 0.36 | T | 0.95 | 0.86 | 1.05 | 3.12E-01 | 3.55E-01 |
| 6 | rs760880   | 27408181 | C | 0.34 | 0.35 | A | 0.95 | 0.86 | 1.05 | 3.12E-01 | 3.57E-01 |
| 6 | rs7772160  | 27412386 | C | 0.44 | 0.45 | T | 0.97 | 0.89 | 1.07 | 5.64E-01 | 5.78E-01 |
| 6 | rs1883216  | 27425185 | C | 0.36 | 0.36 | A | 0.97 | 0.88 | 1.06 | 4.82E-01 | 5.35E-01 |
| 6 | rs10946921 | 27431855 | A | 0.29 | 0.28 | C | 1.07 | 0.96 | 1.18 | 2.23E-01 | 1.92E-01 |
| 6 | rs7761966  | 27445703 | T | 0.47 | 0.47 | C | 1.00 | 0.91 | 1.10 | 9.97E-01 | 9.82E-01 |
| 6 | rs4713108  | 27458013 | A | 0.37 | 0.35 | G | 1.09 | 0.99 | 1.20 | 7.31E-02 | 7.16E-02 |
| 6 | rs10456051 | 27463436 | C | 0.08 | 0.07 | T | 1.13 | 0.95 | 1.34 | 1.64E-01 | 2.00E-01 |
| 6 | rs16867808 | 27463684 | C | 0.09 | 0.08 | T | 1.09 | 0.92 | 1.28 | 3.26E-01 | 3.17E-01 |

|   |            |          |   |      |      |   |      |      |      |          |          |
|---|------------|----------|---|------|------|---|------|------|------|----------|----------|
| 6 | rs6903282  | 27466712 | A | 0.37 | 0.35 | G | 1.09 | 0.99 | 1.20 | 6.62E-02 | 6.49E-02 |
| 6 | rs12189640 | 27474657 | C | 0.08 | 0.07 | T | 1.13 | 0.95 | 1.34 | 1.80E-01 | 2.18E-01 |
| 6 | rs2205829  | 27480227 | G | 0.48 | 0.45 | A | 1.11 | 1.02 | 1.22 | 2.12E-02 | 2.19E-02 |
| 6 | rs2205831  | 27480308 | C | 0.38 | 0.36 | T | 1.10 | 1.00 | 1.20 | 6.09E-02 | 6.06E-02 |
| 6 | rs6918131  | 27480917 | G | 0.30 | 0.29 | A | 1.06 | 0.96 | 1.17 | 2.50E-01 | 2.19E-01 |
| 6 | rs970668   | 27488602 | T | 0.11 | 0.12 | C | 0.91 | 0.79 | 1.06 | 2.27E-01 | 2.22E-01 |
| 6 | rs6904596  | 27491299 | A | 0.07 | 0.10 | G | 0.71 | 0.60 | 0.84 | 6.80E-05 | 8.08E-05 |
| 6 | rs2064092  | 27511371 | A | 0.08 | 0.08 | C | 0.94 | 0.79 | 1.12 | 4.82E-01 | 4.76E-01 |
| 6 | rs6934794  | 27519345 | A | 0.19 | 0.20 | G | 0.94 | 0.84 | 1.06 | 3.26E-01 | 3.30E-01 |
| 6 | rs6908024  | 27526897 | G | 0.11 | 0.12 | A | 0.91 | 0.79 | 1.06 | 2.30E-01 | 2.29E-01 |
| 6 | rs10484399 | 27534528 | G | 0.07 | 0.09 | A | 0.71 | 0.59 | 0.84 | 9.40E-05 | 1.25E-04 |
| 6 | rs6903982  | 27545744 | C | 0.07 | 0.08 | T | 0.92 | 0.77 | 1.09 | 3.30E-01 | 2.91E-01 |
| 6 | rs7774939  | 27547792 | A | 0.20 | 0.21 | C | 0.94 | 0.84 | 1.05 | 2.76E-01 | 2.71E-01 |
| 6 | rs4713113  | 27555126 | A | 0.20 | 0.21 | G | 0.93 | 0.83 | 1.04 | 2.06E-01 | 2.01E-01 |
| 6 | rs10946940 | 27560587 | A | 0.35 | 0.37 | G | 0.89 | 0.81 | 0.98 | 2.18E-02 | 2.08E-02 |
| 6 | rs9461392  | 27566169 | T | 0.11 | 0.12 | C | 0.90 | 0.78 | 1.04 | 1.62E-01 | 1.67E-01 |
| 6 | rs2143082  | 27601587 | G | 0.12 | 0.13 | A | 0.93 | 0.81 | 1.07 | 3.10E-01 | 3.12E-01 |
| 6 | rs6917366  | 27634640 | T | 0.18 | 0.17 | C | 1.09 | 0.97 | 1.23 | 1.54E-01 | 1.88E-01 |
| 6 | rs9368521  | 27645278 | C | 0.09 | 0.09 | T | 1.02 | 0.86 | 1.19 | 8.60E-01 | 8.88E-01 |
| 6 | rs1010261  | 27655564 | A | 0.02 | 0.02 | G | 1.03 | 0.72 | 1.48 | 8.55E-01 | 8.56E-01 |
| 6 | rs9348772  | 27656090 | T | 0.31 | 0.33 | G | 0.91 | 0.83 | 1.01 | 6.71E-02 | 5.64E-02 |
| 6 | rs10946943 | 27656255 | A | 0.09 | 0.09 | G | 1.01 | 0.86 | 1.19 | 9.01E-01 | 9.31E-01 |
| 6 | rs9380006  | 27656499 | C | 0.17 | 0.16 | A | 1.09 | 0.96 | 1.23 | 1.74E-01 | 2.09E-01 |
| 6 | rs6920044  | 27657647 | A | 0.09 | 0.09 | G | 1.02 | 0.87 | 1.20 | 8.15E-01 | 8.44E-01 |
| 6 | rs9380007  | 27660508 | C | 0.36 | 0.37 | T | 0.95 | 0.87 | 1.05 | 3.03E-01 | 2.74E-01 |
| 6 | rs12663707 | 27668013 | A | 0.09 | 0.09 | G | 1.02 | 0.87 | 1.19 | 8.36E-01 | 8.65E-01 |
| 6 | rs17749927 | 27669976 | G | 0.07 | 0.09 | A | 0.71 | 0.60 | 0.85 | 1.34E-04 | 1.79E-04 |
| 6 | rs2393997  | 27670697 | T | 0.13 | 0.11 | G | 1.23 | 1.07 | 1.41 | 3.37E-03 | 2.40E-03 |
| 6 | rs10484400 | 27670917 | C | 0.09 | 0.09 | T | 1.02 | 0.87 | 1.19 | 8.36E-01 | 8.65E-01 |
| 6 | rs4713118  | 27676794 | G | 0.24 | 0.26 | A | 0.92 | 0.83 | 1.02 | 1.13E-01 | 1.05E-01 |
| 6 | rs9380010  | 27683572 | G | 0.22 | 0.24 | A | 0.91 | 0.82 | 1.02 | 9.12E-02 | 8.37E-02 |
| 6 | rs9295740  | 27689502 | A | 0.16 | 0.18 | G | 0.83 | 0.73 | 0.94 | 2.95E-03 | 3.14E-03 |
| 6 | rs9468209  | 27694421 | T | 0.36 | 0.37 | C | 0.96 | 0.87 | 1.05 | 3.83E-01 | 3.54E-01 |
| 6 | rs9468213  | 27706180 | A | 0.32 | 0.33 | G | 0.94 | 0.86 | 1.04 | 2.34E-01 | 2.24E-01 |



|   |            |          |   |      |      |   |      |      |      |          |          |
|---|------------|----------|---|------|------|---|------|------|------|----------|----------|
| 6 | rs4713119  | 27712825 | G | 0.14 | 0.11 | A | 1.23 | 1.07 | 1.41 | 3.73E-03 | 2.80E-03 |
| 6 | rs9283880  | 27715243 | C | 0.23 | 0.25 | A | 0.92 | 0.83 | 1.03 | 1.42E-01 | 1.40E-01 |
| 6 | rs4713120  | 27721835 | A | 0.35 | 0.36 | C | 0.97 | 0.88 | 1.06 | 4.73E-01 | 4.32E-01 |
| 6 | rs7776351  | 27726731 | T | 0.23 | 0.25 | C | 0.93 | 0.83 | 1.03 | 1.76E-01 | 1.71E-01 |
| 6 | rs9295746  | 27730064 | C | 0.22 | 0.23 | T | 0.92 | 0.82 | 1.02 | 1.26E-01 | 1.20E-01 |
| 6 | rs742047   | 27739380 | G | 0.21 | 0.23 | A | 0.91 | 0.82 | 1.02 | 9.77E-02 | 9.43E-02 |
| 6 | rs6915101  | 27741682 | T | 0.01 | 0.01 | C | 1.08 | 0.73 | 1.59 | 7.05E-01 | 6.65E-01 |
| 6 | rs9468226  | 27746178 | G | 0.04 | 0.04 | A | 1.05 | 0.83 | 1.33 | 6.75E-01 | 6.80E-01 |
| 6 | rs9295749  | 27767395 | T | 0.06 | 0.06 | C | 0.98 | 0.81 | 1.19 | 8.57E-01 | 8.50E-01 |
| 6 | rs9461412  | 27771654 | C | 0.04 | 0.04 | T | 1.06 | 0.84 | 1.34 | 6.15E-01 | 6.19E-01 |
| 6 | rs200479   | 27771684 | C | 0.02 | 0.02 | T | 1.14 | 0.84 | 1.55 | 3.94E-01 | 3.38E-01 |
| 6 | rs200480   | 27773664 | C | 0.32 | 0.32 | T | 1.00 | 0.90 | 1.10 | 9.48E-01 | 9.21E-01 |
| 6 | rs9295750  | 27784428 | G | 0.07 | 0.08 | A | 0.95 | 0.80 | 1.13 | 5.58E-01 | 5.46E-01 |
| 6 | rs12196939 | 27787990 | A | 0.17 | 0.17 | G | 0.99 | 0.87 | 1.11 | 8.14E-01 | 7.90E-01 |
| 6 | rs175597   | 27810626 | G | 0.08 | 0.11 | A | 0.76 | 0.65 | 0.89 | 8.48E-04 | 1.10E-03 |
| 6 | rs200997   | 27811815 | T | 0.28 | 0.28 | C | 1.00 | 0.90 | 1.10 | 9.37E-01 | 9.30E-01 |
| 6 | rs200991   | 27815494 | T | 0.13 | 0.15 | G | 0.82 | 0.71 | 0.93 | 2.79E-03 | 3.52E-03 |
| 6 | rs13194781 | 27815639 | G | 0.07 | 0.09 | A | 0.72 | 0.60 | 0.85 | 1.72E-04 | 2.22E-04 |
| 6 | rs9461416  | 27825860 | A | 0.04 | 0.04 | G | 0.98 | 0.78 | 1.23 | 8.65E-01 | 8.79E-01 |
| 6 | rs200951   | 27835930 | G | 0.25 | 0.25 | A | 1.01 | 0.90 | 1.12 | 9.20E-01 | 9.12E-01 |
| 6 | rs200953   | 27837267 | C | 0.08 | 0.11 | T | 0.76 | 0.65 | 0.89 | 7.16E-04 | 9.13E-04 |
| 6 | rs510987   | 27847517 | A | 0.25 | 0.24 | G | 1.02 | 0.92 | 1.14 | 6.75E-01 | 6.77E-01 |
| 6 | rs200969   | 27859453 | G | 0.20 | 0.21 | A | 0.96 | 0.85 | 1.07 | 4.41E-01 | 4.29E-01 |
| 6 | rs200968   | 27859568 | G | 0.15 | 0.16 | A | 0.94 | 0.82 | 1.06 | 3.06E-01 | 2.92E-01 |
| 6 | rs1873213  | 27869321 | C | 0.03 | 0.03 | A | 1.15 | 0.88 | 1.49 | 3.10E-01 | 3.11E-01 |
| 6 | rs9468254  | 27884916 | A | 0.04 | 0.03 | G | 1.16 | 0.90 | 1.49 | 2.47E-01 | 2.44E-01 |
| 6 | rs731132   | 27885356 | G | 0.38 | 0.39 | T | 0.93 | 0.84 | 1.02 | 1.11E-01 | 9.41E-02 |
| 6 | rs2130357  | 27886830 | T | 0.25 | 0.23 | C | 1.11 | 1.00 | 1.23 | 5.97E-02 | 7.26E-02 |
| 6 | rs6933825  | 27890631 | G | 0.13 | 0.13 | A | 1.04 | 0.91 | 1.19 | 5.81E-01 | 5.99E-01 |
| 6 | rs156737   | 27895213 | C | 0.35 | 0.35 | T | 1.01 | 0.91 | 1.11 | 8.89E-01 | 8.97E-01 |
| 6 | rs9468256  | 27895504 | A | 0.13 | 0.13 | G | 1.04 | 0.91 | 1.19 | 5.81E-01 | 5.99E-01 |
| 6 | rs6910968  | 27904181 | T | 0.09 | 0.09 | C | 0.92 | 0.78 | 1.08 | 3.04E-01 | 2.69E-01 |
| 6 | rs7767176  | 27925367 | A | 0.07 | 0.08 | G | 0.94 | 0.79 | 1.12 | 5.07E-01 | 4.56E-01 |
| 6 | rs9380030  | 27925827 | G | 0.03 | 0.02 | A | 1.15 | 0.86 | 1.54 | 3.46E-01 | 2.80E-01 |

|   |            |          |   |      |      |   |      |      |      |          |          |
|---|------------|----------|---|------|------|---|------|------|------|----------|----------|
| 6 | rs2116984  | 27932762 | A | 0.13 | 0.12 | C | 1.07 | 0.93 | 1.22 | 3.58E-01 | 3.80E-01 |
| 6 | rs13214703 | 27941387 | C | 0.08 | 0.08 | T | 0.98 | 0.83 | 1.16 | 8.33E-01 | 8.27E-01 |
| 6 | rs12332927 | 27955115 | C | 0.12 | 0.11 | T | 1.11 | 0.97 | 1.28 | 1.35E-01 | 1.57E-01 |
| 6 | rs9357054  | 27957079 | C | 0.04 | 0.03 | T | 1.30 | 1.01 | 1.68 | 4.18E-02 | 4.43E-02 |
| 6 | rs16893540 | 27958111 | A | 0.04 | 0.04 | C | 1.03 | 0.81 | 1.30 | 8.36E-01 | 8.11E-01 |
| 6 | rs149971   | 27982152 | A | 0.36 | 0.36 | G | 1.01 | 0.92 | 1.11 | 8.60E-01 | 8.59E-01 |
| 6 | rs149990   | 27998258 | A | 0.10 | 0.12 | G | 0.83 | 0.71 | 0.96 | 1.21E-02 | 1.64E-02 |
| 6 | rs17709145 | 28004556 | G | 0.06 | 0.06 | T | 0.94 | 0.78 | 1.14 | 5.34E-01 | 6.75E-01 |
| 6 | rs2394044  | 28008331 | C | 0.05 | 0.04 | T | 1.25 | 1.00 | 1.57 | 4.91E-02 | 4.97E-02 |
| 6 | rs149900   | 28014597 | T | 0.21 | 0.22 | C | 0.96 | 0.86 | 1.07 | 4.68E-01 | 4.94E-01 |
| 6 | rs9393879  | 28018944 | A | 0.05 | 0.04 | G | 1.19 | 0.96 | 1.47 | 1.16E-01 | 1.25E-01 |
| 6 | rs203888   | 28021589 | A | 0.21 | 0.22 | G | 0.95 | 0.85 | 1.06 | 3.90E-01 | 4.01E-01 |
| 6 | rs203890   | 28022248 | C | 0.21 | 0.22 | T | 0.96 | 0.86 | 1.07 | 4.64E-01 | 4.73E-01 |
| 6 | rs9468276  | 28027688 | C | 0.22 | 0.22 | A | 0.97 | 0.87 | 1.08 | 5.89E-01 | 6.14E-01 |
| 6 | rs149951   | 28033087 | C | 0.27 | 0.27 | T | 1.01 | 0.91 | 1.12 | 8.35E-01 | 8.26E-01 |
| 6 | rs149957   | 28037020 | T | 0.08 | 0.07 | G | 1.10 | 0.93 | 1.31 | 2.51E-01 | 2.90E-01 |
| 6 | rs203877   | 28048624 | C | 0.27 | 0.26 | T | 1.03 | 0.93 | 1.15 | 5.25E-01 | 5.27E-01 |
| 6 | rs17767294 | 28054198 | G | 0.09 | 0.08 | A | 1.18 | 1.00 | 1.39 | 4.60E-02 | 5.27E-02 |
| 6 | rs10484404 | 28055495 | T | 0.10 | 0.10 | C | 0.99 | 0.85 | 1.16 | 9.37E-01 | 8.80E-01 |
| 6 | rs3734572  | 28059458 | G | 0.04 | 0.04 | A | 0.92 | 0.72 | 1.17 | 4.87E-01 | 4.91E-01 |
| 6 | rs13197574 | 28060239 | C | 0.07 | 0.09 | T | 0.77 | 0.64 | 0.92 | 3.26E-03 | 4.05E-03 |
| 6 | rs203885   | 28076886 | A | 0.05 | 0.04 | G | 1.20 | 0.97 | 1.49 | 8.79E-02 | 1.09E-01 |
| 6 | rs1654774  | 28096280 | C | 0.42 | 0.40 | T | 1.07 | 0.97 | 1.17 | 1.75E-01 | 1.70E-01 |
| 6 | rs6929559  | 28134106 | C | 0.09 | 0.10 | T | 0.99 | 0.85 | 1.15 | 8.77E-01 | 8.16E-01 |
| 6 | rs9393902  | 28137730 | G | 0.04 | 0.04 | A | 1.15 | 0.92 | 1.45 | 2.23E-01 | 1.84E-01 |
| 6 | rs9380064  | 28143118 | G | 0.11 | 0.13 | A | 0.86 | 0.74 | 0.99 | 3.21E-02 | 4.50E-02 |
| 6 | rs1150683  | 28155314 | T | 0.05 | 0.04 | C | 1.20 | 0.97 | 1.48 | 8.88E-02 | 1.10E-01 |
| 6 | rs1233708  | 28173219 | A | 0.27 | 0.27 | G | 1.04 | 0.94 | 1.15 | 4.52E-01 | 4.25E-01 |
| 6 | rs1233665  | 28178512 | G | 0.13 | 0.13 | A | 1.06 | 0.92 | 1.21 | 4.27E-01 | 4.84E-01 |
| 6 | rs1150699  | 28181675 | T | 0.13 | 0.13 | C | 1.05 | 0.91 | 1.20 | 5.26E-01 | 6.08E-01 |
| 6 | rs1150704  | 28184371 | C | 0.13 | 0.13 | A | 1.05 | 0.91 | 1.20 | 5.26E-01 | 6.05E-01 |
| 6 | rs1233664  | 28185726 | A | 0.13 | 0.13 | G | 1.04 | 0.91 | 1.19 | 5.44E-01 | 6.24E-01 |
| 6 | rs1736894  | 28186554 | T | 0.13 | 0.13 | G | 1.05 | 0.91 | 1.20 | 5.27E-01 | 6.00E-01 |
| 6 | rs1736890  | 28189389 | C | 0.13 | 0.13 | T | 1.04 | 0.91 | 1.20 | 5.31E-01 | 6.09E-01 |

|   |            |          |   |      |      |   |      |      |      |          |          |
|---|------------|----------|---|------|------|---|------|------|------|----------|----------|
| 6 | rs9380069  | 28203300 | G | 0.11 | 0.12 | A | 0.90 | 0.78 | 1.04 | 1.35E-01 | 1.70E-01 |
| 6 | rs11752073 | 28204793 | T | 0.10 | 0.09 | G | 1.02 | 0.87 | 1.19 | 8.55E-01 | 9.10E-01 |
| 6 | rs9295768  | 28209102 | A | 0.17 | 0.17 | G | 0.99 | 0.87 | 1.12 | 8.37E-01 | 9.43E-01 |
| 6 | rs967005   | 28210688 | A | 0.17 | 0.17 | G | 0.98 | 0.87 | 1.11 | 7.85E-01 | 8.88E-01 |
| 6 | rs7757215  | 28212489 | A | 0.05 | 0.04 | C | 1.24 | 1.00 | 1.53 | 4.86E-02 | 4.40E-02 |
| 6 | rs1233710  | 28215446 | T | 0.05 | 0.04 | C | 1.19 | 0.96 | 1.47 | 1.15E-01 | 1.15E-01 |
| 6 | rs2235359  | 28215641 | C | 0.14 | 0.15 | A | 0.96 | 0.84 | 1.09 | 5.07E-01 | 4.55E-01 |
| 6 | rs12214383 | 28223731 | T | 0.40 | 0.39 | C | 1.02 | 0.93 | 1.13 | 6.29E-01 | 6.22E-01 |
| 6 | rs12000    | 28227436 | G | 0.20 | 0.19 | A | 1.04 | 0.92 | 1.16 | 5.46E-01 | 5.93E-01 |
| 6 | rs1635     | 28227604 | T | 0.06 | 0.05 | G | 1.25 | 1.02 | 1.52 | 2.81E-02 | 2.98E-02 |
| 6 | rs9461446  | 28227633 | T | 0.05 | 0.04 | C | 1.09 | 0.87 | 1.36 | 4.38E-01 | 3.76E-01 |
| 6 | rs1778507  | 28230717 | A | 0.05 | 0.04 | G | 1.07 | 0.86 | 1.34 | 5.23E-01 | 4.54E-01 |
| 6 | rs2179174  | 28238969 | C | 0.20 | 0.19 | T | 1.05 | 0.93 | 1.17 | 4.46E-01 | 4.96E-01 |
| 6 | rs1419183  | 28242794 | G | 0.12 | 0.14 | T | 0.90 | 0.78 | 1.03 | 1.16E-01 | 1.61E-01 |
| 6 | rs1150724  | 28250236 | A | 0.32 | 0.33 | G | 0.97 | 0.88 | 1.07 | 5.38E-01 | 5.74E-01 |
| 6 | rs13211507 | 28257377 | C | 0.07 | 0.09 | T | 0.77 | 0.65 | 0.92 | 3.95E-03 | 5.07E-03 |
| 6 | rs9461448  | 28263721 | G | 0.05 | 0.04 | T | 1.06 | 0.85 | 1.31 | 6.25E-01 | 5.93E-01 |
| 6 | rs3800324  | 28264681 | A | 0.06 | 0.04 | G | 1.31 | 1.07 | 1.62 | 9.89E-03 | 9.91E-03 |
| 6 | rs2743554  | 28265640 | C | 0.06 | 0.05 | T | 1.09 | 0.89 | 1.33 | 4.15E-01 | 3.63E-01 |
| 6 | rs2281043  | 28268497 | A | 0.12 | 0.12 | G | 1.03 | 0.89 | 1.18 | 7.01E-01 | 7.74E-01 |
| 6 | rs1997660  | 28269663 | C | 0.30 | 0.30 | T | 1.01 | 0.91 | 1.12 | 8.50E-01 | 8.30E-01 |
| 6 | rs853693   | 28282648 | T | 0.30 | 0.30 | C | 1.01 | 0.92 | 1.12 | 8.18E-01 | 7.95E-01 |
| 6 | rs853690   | 28285482 | T | 0.30 | 0.30 | C | 1.01 | 0.91 | 1.11 | 8.82E-01 | 8.58E-01 |
| 6 | rs742107   | 28290714 | G | 0.06 | 0.04 | T | 1.31 | 1.06 | 1.61 | 1.07E-02 | 1.09E-02 |
| 6 | rs853684   | 28294550 | G | 0.38 | 0.36 | A | 1.07 | 0.97 | 1.17 | 1.84E-01 | 1.90E-01 |
| 6 | rs853679   | 28296863 | T | 0.13 | 0.14 | G | 0.89 | 0.78 | 1.02 | 1.00E-01 | 1.27E-01 |
| 6 | rs853676   | 28299687 | A | 0.13 | 0.14 | G | 0.89 | 0.78 | 1.02 | 9.76E-02 | 1.24E-01 |
| 6 | rs17312661 | 28300336 | G | 0.15 | 0.17 | A | 0.86 | 0.76 | 0.97 | 1.75E-02 | 1.85E-02 |
| 6 | rs7772827  | 28301143 | C | 0.25 | 0.25 | T | 1.00 | 0.90 | 1.11 | 9.93E-01 | 9.82E-01 |
| 6 | rs1416920  | 28302784 | C | 0.25 | 0.25 | T | 0.98 | 0.89 | 1.09 | 7.71E-01 | 7.62E-01 |
| 6 | rs6912584  | 28309590 | C | 0.20 | 0.21 | T | 0.94 | 0.84 | 1.05 | 2.62E-01 | 2.59E-01 |
| 6 | rs213240   | 28315875 | C | 0.37 | 0.36 | T | 1.06 | 0.96 | 1.17 | 2.26E-01 | 2.45E-01 |
| 6 | rs1474589  | 28321544 | A | 0.12 | 0.12 | C | 0.99 | 0.86 | 1.15 | 9.40E-01 | 8.37E-01 |
| 6 | rs6922111  | 28325308 | T | 0.18 | 0.21 | C | 0.88 | 0.78 | 0.99 | 2.84E-02 | 2.49E-02 |

|   |            |          |   |      |      |   |      |      |      |          |          |
|---|------------|----------|---|------|------|---|------|------|------|----------|----------|
| 6 | rs213230   | 28330264 | G | 0.23 | 0.24 | A | 0.93 | 0.83 | 1.03 | 1.61E-01 | 1.34E-01 |
| 6 | rs213228   | 28331252 | G | 0.29 | 0.29 | T | 0.98 | 0.89 | 1.09 | 7.60E-01 | 7.34E-01 |
| 6 | rs12661831 | 28337769 | A | 0.11 | 0.11 | G | 0.98 | 0.85 | 1.14 | 8.08E-01 | 7.51E-01 |
| 6 | rs7774981  | 28346910 | C | 0.22 | 0.24 | T | 0.91 | 0.82 | 1.02 | 9.01E-02 | 8.49E-02 |
| 6 | rs1556957  | 28349926 | C | 0.05 | 0.05 | T | 1.15 | 0.93 | 1.41 | 2.00E-01 | 2.49E-01 |
| 6 | rs3799499  | 28354250 | A | 0.22 | 0.24 | C | 0.91 | 0.81 | 1.01 | 8.75E-02 | 8.30E-02 |
| 6 | rs1361385  | 28358320 | C | 0.28 | 0.29 | T | 0.95 | 0.86 | 1.05 | 3.33E-01 | 2.95E-01 |
| 6 | rs2232434  | 28358893 | G | 0.05 | 0.05 | A | 1.15 | 0.93 | 1.41 | 1.98E-01 | 2.47E-01 |
| 6 | rs2232430  | 28359186 | A | 0.08 | 0.07 | G | 1.25 | 1.05 | 1.49 | 1.07E-02 | 1.28E-02 |
| 6 | rs2232422  | 28366262 | T | 0.09 | 0.09 | C | 0.98 | 0.84 | 1.16 | 8.36E-01 | 7.88E-01 |
| 6 | rs2232419  | 28367768 | T | 0.05 | 0.04 | C | 1.11 | 0.88 | 1.38 | 3.78E-01 | 4.45E-01 |
| 6 | rs10484540 | 28387443 | G | 0.05 | 0.05 | A | 1.16 | 0.94 | 1.43 | 1.61E-01 | 2.03E-01 |
| 6 | rs3800328  | 28390843 | T | 0.27 | 0.29 | C | 0.94 | 0.85 | 1.05 | 2.73E-01 | 2.35E-01 |
| 6 | rs2859365  | 28391465 | G | 0.38 | 0.37 | A | 1.05 | 0.95 | 1.15 | 3.44E-01 | 3.86E-01 |
| 6 | rs11752919 | 28403603 | C | 0.36 | 0.37 | T | 0.94 | 0.85 | 1.04 | 2.08E-01 | 1.68E-01 |
| 6 | rs719370   | 28404353 | T | 0.02 | 0.01 | C | 1.43 | 0.99 | 2.07 | 5.26E-02 | 3.71E-02 |
| 6 | rs916403   | 28408258 | G | 0.46 | 0.45 | A | 1.03 | 0.94 | 1.13 | 4.86E-01 | 5.54E-01 |
| 6 | rs13190937 | 28411244 | A | 0.30 | 0.32 | G | 0.91 | 0.82 | 1.01 | 6.41E-02 | 5.45E-02 |
| 6 | rs13215804 | 28415572 | G | 0.30 | 0.32 | A | 0.91 | 0.82 | 1.01 | 6.17E-02 | 5.22E-02 |
| 6 | rs6903535  | 28417222 | G | 0.36 | 0.37 | A | 0.94 | 0.85 | 1.03 | 2.06E-01 | 1.64E-01 |
| 6 | rs2531809  | 28421368 | A | 0.16 | 0.13 | G | 1.21 | 1.07 | 1.38 | 2.79E-03 | 3.62E-03 |
| 6 | rs2859369  | 28421567 | T | 0.10 | 0.08 | C | 1.20 | 1.03 | 1.41 | 2.20E-02 | 2.30E-02 |
| 6 | rs2859374  | 28428145 | T | 0.16 | 0.13 | C | 1.23 | 1.08 | 1.40 | 1.45E-03 | 1.91E-03 |
| 6 | rs2531815  | 28436060 | T | 0.31 | 0.28 | C | 1.13 | 1.02 | 1.25 | 1.50E-02 | 2.00E-02 |
| 6 | rs12663002 | 28441634 | T | 0.14 | 0.12 | C | 1.26 | 1.10 | 1.44 | 7.69E-04 | 1.20E-03 |
| 6 | rs1029328  | 28447915 | C | 0.12 | 0.13 | T | 0.96 | 0.84 | 1.11 | 5.93E-01 | 5.77E-01 |
| 6 | rs1015811  | 28448086 | G | 0.27 | 0.25 | A | 1.11 | 1.00 | 1.23 | 5.37E-02 | 6.63E-02 |
| 6 | rs7770236  | 28450437 | A | 0.07 | 0.06 | G | 1.21 | 1.01 | 1.45 | 3.84E-02 | 4.55E-02 |
| 6 | rs2859355  | 28461221 | T | 0.33 | 0.32 | C | 1.03 | 0.93 | 1.14 | 5.54E-01 | 6.67E-01 |
| 6 | rs2191037  | 28466988 | C | 0.18 | 0.17 | T | 1.08 | 0.96 | 1.22 | 2.18E-01 | 2.52E-01 |
| 6 | rs406113   | 28483482 | C | 0.33 | 0.32 | A | 1.03 | 0.93 | 1.14 | 5.43E-01 | 6.54E-01 |
| 6 | rs11757000 | 28484869 | C | 0.15 | 0.15 | T | 0.96 | 0.84 | 1.09 | 5.40E-01 | 4.60E-01 |
| 6 | rs445870   | 28494327 | G | 0.31 | 0.30 | A | 1.01 | 0.91 | 1.12 | 8.69E-01 | 9.76E-01 |
| 6 | rs2064424  | 28495962 | C | 0.09 | 0.09 | T | 1.01 | 0.86 | 1.19 | 8.97E-01 | 9.75E-01 |

|   |            |          |   |      |      |   |      |      |      |          |          |
|---|------------|----------|---|------|------|---|------|------|------|----------|----------|
| 6 | rs380879   | 28500449 | G | 0.09 | 0.10 | T | 0.97 | 0.83 | 1.13 | 7.02E-01 | 6.37E-01 |
| 6 | rs448450   | 28501006 | C | 0.09 | 0.10 | A | 0.97 | 0.83 | 1.13 | 7.02E-01 | 6.37E-01 |
| 6 | rs451774   | 28502550 | G | 0.29 | 0.29 | A | 1.02 | 0.92 | 1.13 | 6.61E-01 | 7.69E-01 |
| 6 | rs13215054 | 28502794 | A | 0.21 | 0.23 | C | 0.90 | 0.81 | 1.01 | 7.64E-02 | 7.75E-02 |
| 6 | rs392230   | 28504639 | G | 0.13 | 0.13 | A | 1.00 | 0.87 | 1.14 | 9.45E-01 | 8.54E-01 |
| 6 | rs2394102  | 28512017 | G | 0.11 | 0.11 | A | 0.99 | 0.86 | 1.15 | 8.96E-01 | 8.88E-01 |
| 6 | rs393414   | 28521316 | T | 0.22 | 0.22 | C | 1.01 | 0.91 | 1.13 | 8.22E-01 | 9.65E-01 |
| 6 | rs4711174  | 28532960 | A | 0.09 | 0.10 | G | 0.90 | 0.77 | 1.06 | 2.22E-01 | 1.81E-01 |
| 6 | rs442439   | 28573006 | A | 0.31 | 0.32 | G | 0.96 | 0.87 | 1.06 | 3.91E-01 | 3.70E-01 |
| 6 | rs911178   | 28574415 | T | 0.08 | 0.08 | C | 1.05 | 0.89 | 1.24 | 5.84E-01 | 6.56E-01 |
| 6 | rs13193532 | 28622914 | G | 0.11 | 0.13 | A | 0.81 | 0.70 | 0.94 | 3.87E-03 | 4.64E-03 |
| 6 | rs9295775  | 28627469 | G | 0.16 | 0.17 | A | 0.99 | 0.87 | 1.12 | 8.19E-01 | 7.14E-01 |
| 6 | rs13194504 | 28630691 | A | 0.07 | 0.09 | G | 0.77 | 0.65 | 0.92 | 3.93E-03 | 5.12E-03 |
| 6 | rs7767008  | 28630793 | G | 0.26 | 0.26 | T | 0.98 | 0.88 | 1.09 | 7.28E-01 | 7.20E-01 |
| 6 | rs4713175  | 28635592 | A | 0.09 | 0.10 | C | 0.88 | 0.75 | 1.03 | 9.92E-02 | 9.14E-02 |
| 6 | rs3864294  | 28641957 | G | 0.41 | 0.39 | A | 1.06 | 0.97 | 1.17 | 1.98E-01 | 1.71E-01 |
| 6 | rs9393921  | 28645170 | T | 0.44 | 0.45 | G | 0.94 | 0.85 | 1.03 | 1.68E-01 | 1.32E-01 |
| 6 | rs9885928  | 28650353 | A | 0.44 | 0.46 | G | 0.94 | 0.86 | 1.03 | 1.78E-01 | 1.42E-01 |
| 6 | rs1319075  | 28662521 | C | 0.42 | 0.44 | T | 0.94 | 0.86 | 1.04 | 2.32E-01 | 1.92E-01 |
| 6 | rs7382112  | 28665109 | G | 0.41 | 0.42 | A | 0.97 | 0.88 | 1.06 | 4.98E-01 | 4.41E-01 |
| 6 | rs6939576  | 28669315 | A | 0.28 | 0.29 | G | 0.98 | 0.88 | 1.08 | 6.46E-01 | 6.45E-01 |
| 6 | rs1107159  | 28671723 | C | 0.08 | 0.08 | T | 0.98 | 0.82 | 1.16 | 7.81E-01 | 7.70E-01 |
| 6 | rs9366725  | 28685981 | C | 0.47 | 0.48 | T | 0.96 | 0.88 | 1.06 | 4.22E-01 | 3.57E-01 |
| 6 | rs6909960  | 28688921 | A | 0.08 | 0.08 | G | 0.97 | 0.82 | 1.15 | 7.36E-01 | 7.24E-01 |
| 6 | rs9468413  | 28689672 | C | 0.14 | 0.15 | A | 0.90 | 0.79 | 1.03 | 1.34E-01 | 1.56E-01 |
| 6 | rs1954407  | 28695149 | G | 0.10 | 0.09 | T | 1.09 | 0.93 | 1.27 | 2.98E-01 | 3.37E-01 |
| 6 | rs7755641  | 28699369 | C | 0.05 | 0.06 | T | 0.87 | 0.70 | 1.07 | 1.81E-01 | 1.85E-01 |
| 6 | rs6456834  | 28700352 | T | 0.14 | 0.15 | G | 0.91 | 0.80 | 1.04 | 1.57E-01 | 1.82E-01 |
| 6 | rs7766599  | 28703432 | T | 0.06 | 0.07 | C | 0.86 | 0.71 | 1.04 | 1.15E-01 | 1.23E-01 |
| 6 | rs1233579  | 28712663 | G | 0.07 | 0.09 | A | 0.76 | 0.64 | 0.91 | 2.06E-03 | 2.66E-03 |
| 6 | rs1233585  | 28716345 | G | 0.15 | 0.17 | A | 0.85 | 0.74 | 0.96 | 9.80E-03 | 1.12E-02 |
| 6 | rs1233602  | 28733403 | G | 0.50 | 0.50 | A | 1.00 | 0.92 | 1.10 | 9.40E-01 | 8.40E-01 |
| 6 | rs1233615  | 28739584 | A | 0.47 | 0.47 | C | 0.99 | 0.90 | 1.08 | 7.74E-01 | 6.89E-01 |
| 6 | rs1233621  | 28747643 | C | 0.46 | 0.47 | T | 0.98 | 0.89 | 1.07 | 5.93E-01 | 5.05E-01 |

|   |            |          |   |      |      |   |      |      |      |          |          |
|---|------------|----------|---|------|------|---|------|------|------|----------|----------|
| 6 | rs1233627  | 28751727 | C | 0.49 | 0.49 | T | 0.99 | 0.90 | 1.08 | 7.95E-01 | 6.81E-01 |
| 6 | rs9257181  | 28754520 | T | 0.29 | 0.28 | C | 1.04 | 0.94 | 1.15 | 4.94E-01 | 6.28E-01 |
| 6 | rs1810750  | 28762999 | C | 0.04 | 0.05 | T | 0.87 | 0.69 | 1.10 | 2.44E-01 | 2.66E-01 |
| 6 | rs7767099  | 28768698 | T | 0.07 | 0.09 | C | 0.77 | 0.65 | 0.92 | 3.42E-03 | 4.50E-03 |
| 6 | rs4324798  | 28776117 | A | 0.07 | 0.09 | G | 0.77 | 0.65 | 0.92 | 3.14E-03 | 4.11E-03 |
| 6 | rs209181   | 28792477 | T | 0.11 | 0.14 | C | 0.80 | 0.70 | 0.92 | 2.32E-03 | 3.10E-03 |
| 6 | rs4713182  | 28833225 | A | 0.09 | 0.09 | G | 1.04 | 0.88 | 1.22 | 6.79E-01 | 7.69E-01 |
| 6 | rs3131093  | 28837437 | T | 0.07 | 0.09 | C | 0.77 | 0.65 | 0.92 | 3.27E-03 | 4.34E-03 |
| 6 | rs209160   | 28839879 | C | 0.50 | 0.50 | T | 0.98 | 0.90 | 1.08 | 6.98E-01 | 5.72E-01 |
| 6 | rs209152   | 28846462 | C | 0.47 | 0.48 | T | 0.98 | 0.89 | 1.07 | 6.53E-01 | 5.49E-01 |
| 6 | rs1016472  | 28851367 | C | 0.28 | 0.27 | T | 1.03 | 0.93 | 1.14 | 5.69E-01 | 6.87E-01 |
| 6 | rs9257319  | 28851637 | G | 0.16 | 0.16 | T | 1.02 | 0.90 | 1.15 | 7.79E-01 | 9.33E-01 |
| 6 | rs209139   | 28863483 | T | 0.05 | 0.06 | G | 0.94 | 0.77 | 1.16 | 5.61E-01 | 5.97E-01 |
| 6 | rs2269553  | 28876509 | A | 0.22 | 0.21 | G | 1.06 | 0.95 | 1.18 | 3.38E-01 | 4.46E-01 |
| 6 | rs2894066  | 28893927 | A | 0.37 | 0.38 | G | 0.97 | 0.88 | 1.06 | 4.81E-01 | 4.12E-01 |
| 6 | rs3763338  | 28894311 | T | 0.09 | 0.09 | C | 1.05 | 0.89 | 1.23 | 5.75E-01 | 6.51E-01 |
| 6 | rs2071790  | 28911802 | T | 0.49 | 0.49 | C | 0.99 | 0.90 | 1.08 | 7.87E-01 | 6.60E-01 |
| 6 | rs2071789  | 28912076 | A | 0.16 | 0.16 | G | 1.03 | 0.91 | 1.17 | 6.53E-01 | 8.01E-01 |
| 6 | rs2071788  | 28912307 | A | 0.09 | 0.09 | G | 1.04 | 0.88 | 1.22 | 6.39E-01 | 7.32E-01 |
| 6 | rs9257403  | 28916972 | T | 0.32 | 0.31 | C | 1.06 | 0.96 | 1.17 | 2.37E-01 | 3.50E-01 |
| 6 | rs1476016  | 28922719 | T | 0.49 | 0.49 | C | 0.98 | 0.90 | 1.08 | 7.31E-01 | 6.08E-01 |
| 6 | rs9257425  | 28936556 | G | 0.29 | 0.28 | A | 1.06 | 0.96 | 1.17 | 2.77E-01 | 3.35E-01 |
| 6 | rs3135322  | 28946920 | G | 0.49 | 0.49 | A | 0.98 | 0.89 | 1.08 | 6.78E-01 | 5.61E-01 |
| 6 | rs3130837  | 28948092 | T | 0.07 | 0.09 | G | 0.78 | 0.65 | 0.92 | 3.83E-03 | 4.99E-03 |
| 6 | rs3129791  | 28954293 | A | 0.07 | 0.09 | G | 0.78 | 0.66 | 0.92 | 4.22E-03 | 5.62E-03 |
| 6 | rs6456880  | 28963248 | G | 0.42 | 0.40 | T | 1.07 | 0.97 | 1.17 | 1.68E-01 | 2.39E-01 |
| 6 | rs9257453  | 28968930 | G | 0.09 | 0.08 | A | 1.22 | 1.04 | 1.44 | 1.68E-02 | 2.47E-02 |
| 6 | rs9295784  | 28969148 | C | 0.04 | 0.05 | A | 0.92 | 0.74 | 1.14 | 4.41E-01 | 4.88E-01 |
| 6 | rs6923005  | 28976071 | C | 0.25 | 0.24 | T | 1.10 | 0.99 | 1.22 | 8.35E-02 | 1.09E-01 |
| 6 | rs3130893  | 28980707 | G | 0.07 | 0.09 | A | 0.78 | 0.65 | 0.92 | 4.15E-03 | 5.52E-03 |
| 6 | rs6930903  | 28981244 | G | 0.25 | 0.24 | A | 1.10 | 0.99 | 1.22 | 8.72E-02 | 1.13E-01 |
| 6 | rs2394512  | 28992184 | G | 0.41 | 0.40 | A | 1.05 | 0.96 | 1.16 | 2.68E-01 | 3.63E-01 |
| 6 | rs7741520  | 28994570 | G | 0.24 | 0.22 | A | 1.09 | 0.98 | 1.22 | 1.01E-01 | 1.29E-01 |
| 6 | rs10484544 | 28995719 | C | 0.16 | 0.16 | T | 0.99 | 0.88 | 1.12 | 9.02E-01 | 7.98E-01 |

|   |            |          |   |      |      |   |      |      |      |          |          |
|---|------------|----------|---|------|------|---|------|------|------|----------|----------|
| 6 | rs16894557 | 28999826 | A | 0.08 | 0.09 | G | 0.86 | 0.73 | 1.02 | 7.47E-02 | 5.52E-02 |
| 6 | rs6456889  | 29010824 | C | 0.24 | 0.23 | T | 1.09 | 0.98 | 1.22 | 1.06E-01 | 1.33E-01 |
| 6 | rs7341218  | 29012116 | A | 0.16 | 0.16 | G | 0.99 | 0.88 | 1.12 | 8.65E-01 | 7.40E-01 |
| 6 | rs2143574  | 29014026 | T | 0.41 | 0.39 | C | 1.05 | 0.96 | 1.15 | 3.19E-01 | 4.32E-01 |
| 6 | rs9501294  | 29021017 | A | 0.16 | 0.16 | G | 1.03 | 0.91 | 1.17 | 6.61E-01 | 6.89E-01 |
| 6 | rs7747023  | 29025680 | G | 0.16 | 0.16 | A | 1.03 | 0.91 | 1.16 | 6.89E-01 | 7.19E-01 |
| 6 | rs3117143  | 29031142 | A | 0.07 | 0.09 | C | 0.78 | 0.66 | 0.93 | 5.51E-03 | 7.05E-03 |
| 6 | rs9348821  | 29047203 | G | 0.16 | 0.16 | A | 1.04 | 0.91 | 1.18 | 5.79E-01 | 5.99E-01 |
| 6 | rs7752270  | 29053998 | A | 0.08 | 0.07 | G | 1.20 | 1.01 | 1.42 | 4.24E-02 | 5.93E-02 |
| 6 | rs2142905  | 29064772 | C | 0.16 | 0.17 | T | 0.96 | 0.85 | 1.09 | 5.65E-01 | 4.73E-01 |
| 6 | rs4713201  | 29067263 | C | 0.09 | 0.09 | T | 1.04 | 0.88 | 1.21 | 6.70E-01 | 7.46E-01 |
| 6 | rs3129106  | 29081161 | G | 0.16 | 0.16 | T | 1.00 | 0.89 | 1.14 | 9.59E-01 | 9.33E-01 |
| 6 | rs3129110  | 29085228 | G | 0.40 | 0.39 | A | 1.05 | 0.96 | 1.16 | 2.88E-01 | 3.97E-01 |
| 6 | rs3130778  | 29099579 | T | 0.40 | 0.39 | C | 1.06 | 0.97 | 1.17 | 2.09E-01 | 3.06E-01 |
| 6 | rs9295794  | 29104935 | A | 0.09 | 0.09 | G | 1.03 | 0.88 | 1.20 | 7.40E-01 | 8.35E-01 |
| 6 | rs3130718  | 29114621 | G | 0.48 | 0.48 | A | 0.98 | 0.89 | 1.07 | 6.58E-01 | 5.47E-01 |
| 6 | rs3116847  | 29118813 | C | 0.15 | 0.15 | T | 1.00 | 0.88 | 1.13 | 9.47E-01 | 8.53E-01 |
| 6 | rs3130729  | 29125747 | G | 0.48 | 0.48 | T | 0.98 | 0.89 | 1.07 | 6.63E-01 | 5.56E-01 |
| 6 | rs3129157  | 29141743 | A | 0.03 | 0.04 | G | 0.95 | 0.74 | 1.22 | 6.69E-01 | 6.86E-01 |
| 6 | rs3116817  | 29149561 | G | 0.43 | 0.43 | A | 0.99 | 0.90 | 1.09 | 8.52E-01 | 7.11E-01 |
| 6 | rs1883329  | 29177102 | T | 0.23 | 0.22 | C | 1.07 | 0.96 | 1.19 | 2.25E-01 | 3.11E-01 |
| 6 | rs2206040  | 29178514 | T | 0.48 | 0.48 | C | 0.98 | 0.89 | 1.07 | 6.22E-01 | 5.13E-01 |
| 6 | rs2206041  | 29178606 | T | 0.48 | 0.48 | C | 0.98 | 0.89 | 1.07 | 6.10E-01 | 5.02E-01 |
| 6 | rs3130817  | 29179237 | G | 0.18 | 0.20 | T | 0.91 | 0.81 | 1.02 | 1.07E-01 | 9.72E-02 |
| 6 | rs3130826  | 29181314 | G | 0.23 | 0.22 | A | 1.06 | 0.95 | 1.18 | 2.87E-01 | 3.89E-01 |
| 6 | rs3116837  | 29184660 | T | 0.23 | 0.22 | C | 1.07 | 0.96 | 1.19 | 2.23E-01 | 3.10E-01 |
| 6 | rs3129105  | 29213070 | A | 0.47 | 0.48 | C | 0.97 | 0.88 | 1.06 | 5.15E-01 | 4.17E-01 |
| 6 | rs3117328  | 29230577 | G | 0.45 | 0.46 | T | 0.95 | 0.87 | 1.04 | 2.81E-01 | 2.04E-01 |
| 6 | rs3130827  | 29230683 | T | 0.33 | 0.35 | C | 0.92 | 0.83 | 1.01 | 8.16E-02 | 5.96E-02 |
| 6 | rs6904130  | 29235193 | C | 0.08 | 0.06 | T | 1.22 | 1.02 | 1.46 | 2.83E-02 | 4.08E-02 |
| 6 | rs7766902  | 29236645 | T | 0.11 | 0.11 | G | 1.04 | 0.90 | 1.20 | 6.42E-01 | 7.83E-01 |
| 6 | rs3130830  | 29236722 | G | 0.45 | 0.46 | A | 0.95 | 0.87 | 1.04 | 2.82E-01 | 2.06E-01 |
| 6 | rs3117326  | 29240378 | A | 0.07 | 0.09 | G | 0.76 | 0.64 | 0.90 | 1.89E-03 | 2.53E-03 |
| 6 | rs9468508  | 29253756 | T | 0.04 | 0.05 | C | 0.87 | 0.69 | 1.09 | 2.22E-01 | 2.36E-01 |

|   |            |          |   |      |      |   |      |      |      |          |          |
|---|------------|----------|---|------|------|---|------|------|------|----------|----------|
| 6 | rs1884123  | 29256420 | T | 0.34 | 0.36 | C | 0.93 | 0.84 | 1.02 | 1.14E-01 | 8.13E-02 |
| 6 | rs1033569  | 29257772 | G | 0.37 | 0.40 | A | 0.90 | 0.82 | 0.99 | 2.62E-02 | 1.83E-02 |
| 6 | rs16867628 | 29266497 | A | 0.08 | 0.09 | G | 0.89 | 0.75 | 1.05 | 1.55E-01 | 1.18E-01 |
| 6 | rs4594993  | 29270498 | G | 0.09 | 0.07 | A | 1.22 | 1.04 | 1.44 | 1.66E-02 | 2.46E-02 |
| 6 | rs3117426  | 29272012 | T | 0.18 | 0.20 | C | 0.90 | 0.80 | 1.01 | 7.63E-02 | 6.87E-02 |
| 6 | rs9257694  | 29274486 | T | 0.45 | 0.46 | C | 0.94 | 0.86 | 1.04 | 2.20E-01 | 1.45E-01 |
| 6 | rs17404424 | 29275298 | A | 0.04 | 0.04 | G | 1.10 | 0.88 | 1.38 | 4.11E-01 | 3.46E-01 |
| 6 | rs9257696  | 29275507 | C | 0.16 | 0.14 | T | 1.15 | 1.01 | 1.31 | 3.22E-02 | 4.38E-02 |
| 6 | rs10456370 | 29280736 | C | 0.49 | 0.49 | A | 1.00 | 0.91 | 1.10 | 9.97E-01 | 8.50E-01 |
| 6 | rs4713208  | 29283579 | T | 0.35 | 0.36 | C | 0.97 | 0.88 | 1.07 | 5.19E-01 | 4.60E-01 |
| 6 | rs720831   | 29284518 | T | 0.35 | 0.36 | C | 0.97 | 0.88 | 1.06 | 4.88E-01 | 4.31E-01 |
| 6 | rs12660111 | 29296148 | T | 0.15 | 0.14 | C | 1.08 | 0.95 | 1.23 | 2.35E-01 | 2.88E-01 |
| 6 | rs9357078  | 29297666 | T | 0.11 | 0.10 | C | 1.07 | 0.93 | 1.24 | 3.57E-01 | 4.57E-01 |
| 6 | rs6930435  | 29301222 | A | 0.20 | 0.23 | G | 0.86 | 0.77 | 0.96 | 9.19E-03 | 8.84E-03 |
| 6 | rs1014258  | 29310681 | A | 0.20 | 0.22 | G | 0.86 | 0.77 | 0.96 | 8.73E-03 | 8.34E-03 |
| 6 | rs6930033  | 29323905 | C | 0.15 | 0.14 | A | 1.09 | 0.96 | 1.24 | 2.05E-01 | 2.54E-01 |
| 6 | rs10484546 | 29324599 | C | 0.15 | 0.14 | A | 1.09 | 0.96 | 1.24 | 1.79E-01 | 2.24E-01 |
| 6 | rs9380120  | 29335537 | C | 0.11 | 0.10 | T | 1.07 | 0.92 | 1.24 | 3.91E-01 | 5.00E-01 |
| 6 | rs9257794  | 29335661 | T | 0.19 | 0.22 | C | 0.81 | 0.72 | 0.91 | 2.56E-04 | 3.39E-04 |
| 6 | rs6934993  | 29337500 | G | 0.19 | 0.22 | A | 0.81 | 0.72 | 0.91 | 2.51E-04 | 3.28E-04 |
| 6 | rs7753474  | 29341308 | A | 0.21 | 0.18 | G | 1.16 | 1.04 | 1.30 | 9.02E-03 | 1.38E-02 |
| 6 | rs3749971  | 29342775 | T | 0.07 | 0.09 | C | 0.78 | 0.66 | 0.92 | 3.26E-03 | 4.29E-03 |
| 6 | rs9257802  | 29343355 | T | 0.17 | 0.17 | C | 0.98 | 0.87 | 1.11 | 7.48E-01 | 7.78E-01 |
| 6 | rs4598109  | 29344704 | C | 0.49 | 0.50 | T | 0.95 | 0.87 | 1.04 | 2.83E-01 | 2.11E-01 |
| 6 | rs238883   | 29346226 | C | 0.31 | 0.32 | T | 0.95 | 0.86 | 1.05 | 3.33E-01 | 2.39E-01 |
| 6 | rs238872   | 29351873 | G | 0.43 | 0.46 | A | 0.90 | 0.82 | 0.99 | 3.33E-02 | 2.25E-02 |
| 6 | rs3094556  | 29353408 | A | 0.43 | 0.45 | G | 0.91 | 0.83 | 1.00 | 4.51E-02 | 3.10E-02 |
| 6 | rs3094551  | 29354799 | T | 0.39 | 0.41 | C | 0.94 | 0.85 | 1.03 | 1.79E-01 | 1.31E-01 |
| 6 | rs3094550  | 29354809 | G | 0.39 | 0.41 | T | 0.94 | 0.86 | 1.03 | 1.88E-01 | 1.39E-01 |
| 6 | rs238869   | 29355113 | G | 0.32 | 0.34 | A | 0.91 | 0.82 | 1.00 | 5.76E-02 | 5.73E-02 |
| 6 | rs3094549  | 29355148 | G | 0.32 | 0.31 | T | 1.04 | 0.94 | 1.15 | 4.57E-01 | 5.70E-01 |
| 6 | rs1419638  | 29355519 | A | 0.37 | 0.37 | G | 1.02 | 0.93 | 1.12 | 7.32E-01 | 7.52E-01 |
| 6 | rs4711185  | 29356046 | A | 0.42 | 0.40 | G | 1.11 | 1.02 | 1.22 | 2.24E-02 | 2.29E-02 |
| 6 | rs9257809  | 29356331 | G | 0.08 | 0.09 | A | 0.79 | 0.67 | 0.94 | 6.26E-03 | 8.44E-03 |



|   |            |          |   |      |      |   |      |      |      |          |          |
|---|------------|----------|---|------|------|---|------|------|------|----------|----------|
| 6 | rs379157   | 29356587 | C | 0.42 | 0.45 | T | 0.90 | 0.82 | 0.98 | 2.11E-02 | 1.90E-02 |
| 6 | rs9393956  | 29357645 | G | 0.05 | 0.04 | A | 1.24 | 1.00 | 1.53 | 4.78E-02 | 5.16E-02 |
| 6 | rs16894836 | 29361707 | G | 0.13 | 0.13 | T | 0.96 | 0.84 | 1.10 | 5.30E-01 | 5.77E-01 |
| 6 | rs1028411  | 29367399 | C | 0.47 | 0.45 | A | 1.07 | 0.97 | 1.17 | 1.63E-01 | 1.61E-01 |
| 6 | rs9257837  | 29368021 | T | 0.15 | 0.15 | C | 0.96 | 0.85 | 1.09 | 5.35E-01 | 4.68E-01 |
| 6 | rs9257843  | 29368665 | C | 0.49 | 0.47 | T | 1.09 | 1.00 | 1.20 | 6.31E-02 | 5.83E-02 |
| 6 | rs9405124  | 29368813 | G | 0.32 | 0.30 | A | 1.11 | 1.00 | 1.23 | 4.46E-02 | 3.61E-02 |
| 6 | rs2394604  | 29369268 | A | 0.15 | 0.16 | C | 0.97 | 0.86 | 1.10 | 6.80E-01 | 6.14E-01 |
| 6 | rs1419633  | 29373213 | A | 0.49 | 0.47 | G | 1.10 | 1.00 | 1.20 | 5.33E-02 | 5.08E-02 |
| 6 | rs1419632  | 29373249 | G | 0.49 | 0.47 | T | 1.09 | 1.00 | 1.20 | 5.55E-02 | 5.16E-02 |
| 6 | rs3131024  | 29385237 | T | 0.10 | 0.11 | C | 0.83 | 0.71 | 0.96 | 1.37E-02 | 1.29E-02 |
| 6 | rs2523421  | 29390440 | C | 0.10 | 0.09 | T | 1.12 | 0.96 | 1.31 | 1.50E-01 | 1.98E-01 |
| 6 | rs7770592  | 29395747 | A | 0.35 | 0.32 | C | 1.14 | 1.03 | 1.26 | 9.90E-03 | 6.80E-03 |
| 6 | rs9295805  | 29397779 | T | 0.32 | 0.30 | C | 1.10 | 1.00 | 1.22 | 5.31E-02 | 4.33E-02 |
| 6 | rs3131025  | 29398815 | A | 0.30 | 0.32 | G | 0.93 | 0.84 | 1.03 | 1.76E-01 | 1.33E-01 |
| 6 | rs2074469  | 29407970 | G | 0.18 | 0.19 | A | 0.94 | 0.83 | 1.05 | 2.67E-01 | 2.28E-01 |
| 6 | rs2074466  | 29408313 | T | 0.15 | 0.15 | G | 0.97 | 0.85 | 1.10 | 6.04E-01 | 5.35E-01 |
| 6 | rs2074464  | 29408528 | T | 0.48 | 0.46 | C | 1.08 | 0.98 | 1.19 | 1.08E-01 | 9.28E-02 |
| 6 | rs7765791  | 29410093 | C | 0.03 | 0.02 | T | 1.16 | 0.87 | 1.54 | 3.18E-01 | 3.04E-01 |
| 6 | rs2523442  | 29417817 | G | 0.25 | 0.25 | A | 1.02 | 0.92 | 1.13 | 7.00E-01 | 7.40E-01 |
| 6 | rs9257863  | 29425584 | G | 0.15 | 0.16 | T | 0.96 | 0.85 | 1.09 | 5.58E-01 | 4.96E-01 |
| 6 | rs2107191  | 29434295 | G | 0.46 | 0.44 | A | 1.06 | 0.97 | 1.16 | 2.26E-01 | 2.01E-01 |
| 6 | rs4713226  | 29434414 | A | 0.10 | 0.10 | G | 1.05 | 0.90 | 1.22 | 5.44E-01 | 6.33E-01 |
| 6 | rs1362076  | 29441169 | A | 0.01 | 0.01 | C | 0.94 | 0.61 | 1.46 | 7.98E-01 | 7.14E-01 |
| 6 | rs7751705  | 29441618 | T | 0.03 | 0.02 | C | 1.23 | 0.92 | 1.65 | 1.69E-01 | 1.77E-01 |
| 6 | rs2746150  | 29442701 | T | 0.07 | 0.09 | C | 0.80 | 0.67 | 0.94 | 7.74E-03 | 1.03E-02 |
| 6 | rs2523444  | 29442831 | T | 0.07 | 0.07 | C | 1.05 | 0.87 | 1.26 | 6.12E-01 | 7.23E-01 |
| 6 | rs1233492  | 29458477 | C | 0.26 | 0.26 | T | 1.03 | 0.93 | 1.14 | 6.15E-01 | 6.51E-01 |
| 6 | rs6906307  | 29463892 | G | 0.03 | 0.02 | T | 1.27 | 0.94 | 1.71 | 1.19E-01 | 1.33E-01 |
| 6 | rs1345227  | 29466956 | G | 0.40 | 0.40 | A | 1.02 | 0.93 | 1.13 | 6.36E-01 | 5.80E-01 |
| 6 | rs7746192  | 29468207 | T | 0.01 | 0.01 | C | 1.12 | 0.72 | 1.73 | 6.15E-01 | 6.60E-01 |
| 6 | rs1233487  | 29468809 | C | 0.23 | 0.26 | T | 0.86 | 0.78 | 0.96 | 7.31E-03 | 6.29E-03 |
| 6 | rs757256   | 29472916 | A | 0.42 | 0.43 | G | 0.98 | 0.89 | 1.08 | 6.72E-01 | 6.69E-01 |
| 6 | rs734959   | 29474662 | C | 0.41 | 0.41 | T | 1.02 | 0.93 | 1.12 | 7.06E-01 | 6.49E-01 |

|   |            |          |   |      |      |   |      |      |      |          |          |
|---|------------|----------|---|------|------|---|------|------|------|----------|----------|
| 6 | rs3131020  | 29475902 | T | 0.42 | 0.43 | C | 0.99 | 0.90 | 1.08 | 7.89E-01 | 7.88E-01 |
| 6 | rs3131021  | 29476142 | A | 0.43 | 0.42 | G | 1.04 | 0.95 | 1.14 | 4.24E-01 | 3.81E-01 |
| 6 | rs3094572  | 29480993 | A | 0.41 | 0.41 | G | 1.02 | 0.93 | 1.13 | 6.19E-01 | 5.81E-01 |
| 6 | rs1592411  | 29483911 | A | 0.43 | 0.43 | G | 1.01 | 0.92 | 1.11 | 8.03E-01 | 7.98E-01 |
| 6 | rs3094564  | 29486345 | G | 0.41 | 0.41 | A | 1.02 | 0.93 | 1.13 | 6.26E-01 | 5.91E-01 |
| 6 | rs969931   | 29494897 | C | 0.48 | 0.48 | A | 1.00 | 0.91 | 1.10 | 9.86E-01 | 9.14E-01 |
| 6 | rs9501676  | 29496776 | A | 0.01 | 0.01 | G | 1.82 | 1.17 | 2.82 | 6.71E-03 | 5.57E-03 |
| 6 | rs9501677  | 29497002 | A | 0.03 | 0.02 | G | 1.33 | 0.99 | 1.77 | 5.58E-02 | 5.08E-02 |
| 6 | rs909968   | 29499505 | A | 0.45 | 0.46 | G | 0.98 | 0.89 | 1.07 | 6.02E-01 | 6.48E-01 |
| 6 | rs9461533  | 29501422 | G | 0.01 | 0.01 | A | 1.74 | 1.14 | 2.67 | 1.01E-02 | 8.47E-03 |
| 6 | rs446198   | 29507426 | A | 0.46 | 0.47 | G | 0.96 | 0.88 | 1.06 | 4.20E-01 | 4.56E-01 |
| 6 | rs2534795  | 29511341 | A | 0.26 | 0.25 | G | 1.04 | 0.94 | 1.15 | 4.57E-01 | 4.96E-01 |
| 6 | rs3094575  | 29515802 | T | 0.25 | 0.25 | C | 0.98 | 0.88 | 1.09 | 6.94E-01 | 6.52E-01 |
| 6 | rs3094576  | 29516242 | A | 0.14 | 0.14 | C | 1.00 | 0.87 | 1.14 | 9.88E-01 | 9.35E-01 |
| 6 | rs376681   | 29517093 | C | 0.46 | 0.47 | T | 0.96 | 0.88 | 1.05 | 3.93E-01 | 4.32E-01 |
| 6 | rs17351888 | 29519173 | C | 0.07 | 0.06 | T | 1.10 | 0.92 | 1.33 | 2.96E-01 | 2.74E-01 |
| 6 | rs2534790  | 29524168 | A | 0.26 | 0.26 | C | 1.04 | 0.93 | 1.15 | 5.05E-01 | 5.42E-01 |
| 6 | rs2745412  | 29524401 | T | 0.07 | 0.07 | C | 1.05 | 0.88 | 1.25 | 6.01E-01 | 7.00E-01 |
| 6 | rs2272991  | 29527599 | G | 0.03 | 0.03 | A | 1.20 | 0.92 | 1.57 | 1.84E-01 | 1.72E-01 |
| 6 | rs362511   | 29530850 | C | 0.21 | 0.21 | T | 1.05 | 0.94 | 1.18 | 3.60E-01 | 4.38E-01 |
| 6 | rs362529   | 29530868 | A | 0.15 | 0.15 | G | 1.02 | 0.89 | 1.15 | 8.15E-01 | 7.65E-01 |
| 6 | rs459970   | 29531253 | T | 0.08 | 0.08 | C | 1.03 | 0.87 | 1.22 | 7.44E-01 | 8.71E-01 |
| 6 | rs388234   | 29533295 | G | 0.36 | 0.37 | A | 0.95 | 0.86 | 1.04 | 2.60E-01 | 2.12E-01 |
| 6 | rs3094577  | 29533870 | A | 0.41 | 0.37 | G | 1.17 | 1.07 | 1.29 | 9.79E-04 | 8.03E-04 |
| 6 | rs1235162  | 29537224 | C | 0.08 | 0.09 | T | 0.82 | 0.70 | 0.97 | 2.25E-02 | 2.76E-02 |
| 6 | rs1233400  | 29537975 | T | 0.17 | 0.14 | C | 1.20 | 1.06 | 1.36 | 4.07E-03 | 5.33E-03 |
| 6 | rs1233399  | 29539482 | T | 0.21 | 0.19 | C | 1.14 | 1.02 | 1.28 | 2.71E-02 | 3.43E-02 |
| 6 | rs3025652  | 29539765 | T | 0.14 | 0.17 | C | 0.79 | 0.69 | 0.90 | 3.49E-04 | 3.09E-04 |
| 6 | rs362510   | 29540745 | A | 0.21 | 0.19 | G | 1.15 | 1.03 | 1.29 | 1.66E-02 | 2.11E-02 |
| 6 | rs3117073  | 29544825 | G | 0.32 | 0.28 | A | 1.20 | 1.09 | 1.33 | 3.65E-04 | 2.30E-04 |
| 6 | rs1233397  | 29545715 | C | 0.23 | 0.22 | T | 1.04 | 0.94 | 1.16 | 4.45E-01 | 5.07E-01 |
| 6 | rs12530421 | 29549443 | C | 0.05 | 0.07 | A | 0.75 | 0.62 | 0.91 | 3.89E-03 | 3.65E-03 |
| 6 | rs1233391  | 29550618 | G | 0.20 | 0.20 | A | 0.99 | 0.89 | 1.11 | 8.93E-01 | 8.35E-01 |
| 6 | rs362521   | 29556759 | A | 0.05 | 0.06 | G | 0.74 | 0.60 | 0.91 | 4.14E-03 | 4.27E-03 |

|   |            |          |   |      |      |   |      |      |      |          |          |
|---|------------|----------|---|------|------|---|------|------|------|----------|----------|
| 6 | rs1233386  | 29558190 | A | 0.14 | 0.13 | G | 1.11 | 0.97 | 1.26 | 1.30E-01 | 1.45E-01 |
| 6 | rs1233384  | 29559295 | A | 0.14 | 0.13 | G | 1.11 | 0.97 | 1.26 | 1.34E-01 | 1.50E-01 |
| 6 | rs3025646  | 29566842 | G | 0.05 | 0.07 | A | 0.76 | 0.63 | 0.93 | 6.84E-03 | 5.94E-03 |
| 6 | rs3025643  | 29569955 | T | 0.37 | 0.32 | C | 1.24 | 1.12 | 1.36 | 1.88E-05 | 1.64E-05 |
| 6 | rs3025642  | 29570316 | T | 0.04 | 0.05 | C | 0.76 | 0.61 | 0.96 | 2.05E-02 | 2.17E-02 |
| 6 | rs2267633  | 29570841 | G | 0.10 | 0.12 | A | 0.77 | 0.66 | 0.89 | 4.39E-04 | 3.72E-04 |
| 6 | rs2076483  | 29571545 | C | 0.10 | 0.12 | T | 0.76 | 0.66 | 0.89 | 3.79E-04 | 3.21E-04 |
| 6 | rs10946999 | 29571609 | T | 0.11 | 0.12 | G | 0.88 | 0.76 | 1.01 | 7.67E-02 | 8.74E-02 |
| 6 | rs740884   | 29574631 | T | 0.05 | 0.06 | C | 0.92 | 0.75 | 1.13 | 4.13E-01 | 3.90E-01 |
| 6 | rs740882   | 29575456 | A | 0.08 | 0.10 | G | 0.84 | 0.72 | 0.98 | 3.10E-02 | 3.12E-02 |
| 6 | rs29230    | 29576393 | C | 0.14 | 0.17 | T | 0.79 | 0.70 | 0.90 | 3.24E-04 | 2.68E-04 |
| 6 | rs29225    | 29581041 | C | 0.08 | 0.10 | T | 0.84 | 0.72 | 0.98 | 3.14E-02 | 3.17E-02 |
| 6 | rs29246    | 29588146 | C | 0.04 | 0.05 | T | 0.89 | 0.71 | 1.12 | 3.25E-01 | 3.25E-01 |
| 6 | rs1233374  | 29608694 | G | 0.08 | 0.09 | A | 0.85 | 0.72 | 1.00 | 5.07E-02 | 5.21E-02 |
| 6 | rs29232    | 29611431 | A | 0.35 | 0.37 | G | 0.92 | 0.84 | 1.01 | 9.55E-02 | 9.33E-02 |
| 6 | rs3131854  | 29611885 | A | 0.21 | 0.22 | G | 0.94 | 0.84 | 1.05 | 2.71E-01 | 2.25E-01 |
| 6 | rs3129073  | 29615822 | C | 0.16 | 0.20 | T | 0.81 | 0.72 | 0.91 | 5.38E-04 | 7.38E-04 |
| 6 | rs29234    | 29624112 | G | 0.04 | 0.06 | T | 0.77 | 0.62 | 0.95 | 1.67E-02 | 1.73E-02 |
| 6 | rs3135050  | 29628437 | T | 0.16 | 0.17 | C | 0.98 | 0.86 | 1.11 | 7.10E-01 | 6.76E-01 |
| 6 | rs3130252  | 29631744 | C | 0.16 | 0.17 | T | 0.97 | 0.86 | 1.10 | 6.55E-01 | 6.22E-01 |
| 6 | rs3130253  | 29634012 | A | 0.09 | 0.09 | G | 1.03 | 0.88 | 1.21 | 6.94E-01 | 6.97E-01 |
| 6 | rs1318631  | 29635508 | A | 0.28 | 0.23 | G | 1.30 | 1.18 | 1.45 | 5.17E-07 | 6.16E-07 |
| 6 | rs2071653  | 29635928 | T | 0.20 | 0.21 | C | 0.93 | 0.83 | 1.05 | 2.43E-01 | 2.01E-01 |
| 6 | rs2535246  | 29636409 | C | 0.20 | 0.18 | A | 1.13 | 1.00 | 1.27 | 4.40E-02 | 4.15E-02 |
| 6 | rs9257936  | 29639776 | T | 0.13 | 0.11 | C | 1.21 | 1.05 | 1.39 | 7.78E-03 | 5.51E-03 |
| 6 | rs9257940  | 29642509 | G | 0.03 | 0.04 | A | 0.84 | 0.65 | 1.09 | 1.97E-01 | 1.61E-01 |
| 6 | rs2535238  | 29645038 | T | 0.19 | 0.22 | G | 0.80 | 0.71 | 0.89 | 9.55E-05 | 1.43E-04 |
| 6 | rs2747430  | 29648506 | A | 0.25 | 0.30 | G | 0.75 | 0.68 | 0.84 | 9.46E-08 | 1.58E-07 |
| 6 | rs3129054  | 29649056 | A | 0.32 | 0.32 | G | 1.02 | 0.92 | 1.12 | 7.30E-01 | 6.98E-01 |
| 6 | rs3117292  | 29652199 | G | 0.38 | 0.37 | A | 1.04 | 0.94 | 1.14 | 4.41E-01 | 4.14E-01 |
| 6 | rs3117294  | 29653329 | G | 0.33 | 0.33 | T | 1.00 | 0.91 | 1.10 | 9.97E-01 | 9.54E-01 |
| 6 | rs2747453  | 29654943 | C | 0.19 | 0.17 | T | 1.11 | 0.99 | 1.26 | 7.90E-02 | 7.00E-02 |
| 6 | rs2747454  | 29655113 | A | 0.26 | 0.23 | G | 1.17 | 1.05 | 1.31 | 3.65E-03 | 2.94E-03 |
| 6 | rs2747457  | 29656417 | G | 0.19 | 0.23 | T | 0.80 | 0.71 | 0.89 | 7.43E-05 | 1.03E-04 |

|   |            |          |   |      |      |   |      |      |      |          |          |
|---|------------|----------|---|------|------|---|------|------|------|----------|----------|
| 6 | rs3131888  | 29663889 | G | 0.40 | 0.41 | A | 0.93 | 0.84 | 1.02 | 1.01E-01 | 1.21E-01 |
| 6 | rs3131875  | 29666111 | G | 0.49 | 0.49 | A | 1.01 | 0.92 | 1.11 | 7.91E-01 | 7.70E-01 |
| 6 | rs7776082  | 29667273 | A | 0.41 | 0.44 | G | 0.90 | 0.82 | 0.99 | 2.28E-02 | 2.94E-02 |
| 6 | rs3129066  | 29668537 | C | 0.21 | 0.25 | T | 0.77 | 0.69 | 0.86 | 4.15E-06 | 6.37E-06 |
| 6 | rs3129055  | 29670261 | C | 0.21 | 0.25 | T | 0.77 | 0.69 | 0.86 | 3.67E-06 | 5.54E-06 |
| 6 | rs3131863  | 29673483 | C | 0.26 | 0.29 | T | 0.88 | 0.79 | 0.97 | 1.07E-02 | 8.07E-03 |
| 6 | rs3871468  | 29677641 | G | 0.29 | 0.24 | A | 1.30 | 1.17 | 1.44 | 6.94E-07 | 8.80E-07 |
| 6 | rs1610594  | 29679047 | G | 0.26 | 0.29 | A | 0.87 | 0.79 | 0.97 | 1.02E-02 | 7.54E-03 |
| 6 | rs1611371  | 29680021 | C | 0.22 | 0.24 | T | 0.91 | 0.82 | 1.02 | 9.16E-02 | 7.47E-02 |
| 6 | rs9258170  | 29689590 | G | 0.10 | 0.12 | T | 0.79 | 0.68 | 0.91 | 1.56E-03 | 1.31E-03 |
| 6 | rs1362126  | 29691019 | T | 0.47 | 0.41 | C | 1.31 | 1.19 | 1.43 | 1.47E-08 | 1.76E-08 |
| 6 | rs9258186  | 29692334 | G | 0.10 | 0.12 | A | 0.79 | 0.68 | 0.91 | 1.69E-03 | 1.43E-03 |
| 6 | rs2235383  | 29693499 | C | 0.10 | 0.12 | T | 0.79 | 0.68 | 0.91 | 1.69E-03 | 1.43E-03 |
| 6 | rs2523404  | 29695713 | A | 0.51 | 0.45 | G | 1.29 | 1.17 | 1.41 | 8.55E-08 | 9.42E-08 |
| 6 | rs2272874  | 29696245 | G | 0.10 | 0.12 | A | 0.79 | 0.68 | 0.91 | 1.69E-03 | 1.43E-03 |
| 6 | rs2743925  | 29698050 | C | 0.20 | 0.18 | T | 1.16 | 1.03 | 1.30 | 1.56E-02 | 1.36E-02 |
| 6 | rs1611350  | 29698821 | C | 0.27 | 0.28 | T | 0.93 | 0.84 | 1.03 | 1.68E-01 | 2.15E-01 |
| 6 | rs2523399  | 29700079 | G | 0.41 | 0.44 | A | 0.86 | 0.79 | 0.95 | 2.04E-03 | 2.25E-03 |
| 6 | rs1610601  | 29700183 | T | 0.19 | 0.22 | G | 0.85 | 0.76 | 0.95 | 4.19E-03 | 5.41E-03 |
| 6 | rs7773358  | 29701800 | T | 0.09 | 0.12 | C | 0.77 | 0.66 | 0.90 | 8.23E-04 | 6.73E-04 |
| 6 | rs1610602  | 29702061 | T | 0.23 | 0.26 | G | 0.86 | 0.77 | 0.96 | 5.81E-03 | 7.44E-03 |
| 6 | rs2844833  | 29702206 | C | 0.18 | 0.17 | G | 1.13 | 1.00 | 1.28 | 4.96E-02 | 4.36E-02 |
| 6 | rs2523395  | 29702510 | T | 0.50 | 0.44 | C | 1.28 | 1.16 | 1.40 | 2.42E-07 | 2.27E-07 |
| 6 | rs2394160  | 29703262 | G | 0.50 | 0.44 | A | 1.28 | 1.17 | 1.40 | 1.59E-07 | 1.52E-07 |
| 6 | rs9258209  | 29705402 | T | 0.02 | 0.03 | C | 0.84 | 0.62 | 1.15 | 2.88E-01 | 2.83E-01 |
| 6 | rs932338   | 29706933 | T | 0.18 | 0.18 | C | 0.96 | 0.85 | 1.09 | 5.35E-01 | 5.06E-01 |
| 6 | rs1633096  | 29707267 | A | 0.21 | 0.24 | C | 0.83 | 0.74 | 0.93 | 9.68E-04 | 1.31E-03 |
| 6 | rs9258218  | 29708028 | A | 0.09 | 0.12 | G | 0.77 | 0.66 | 0.90 | 7.59E-04 | 6.12E-04 |
| 6 | rs1610603  | 29708222 | A | 0.18 | 0.19 | G | 0.94 | 0.84 | 1.07 | 3.49E-01 | 3.24E-01 |
| 6 | rs2517938  | 29709840 | G | 0.19 | 0.17 | A | 1.10 | 0.97 | 1.24 | 1.36E-01 | 1.30E-01 |
| 6 | rs2523386  | 29711747 | T | 0.18 | 0.16 | C | 1.12 | 0.99 | 1.27 | 7.36E-02 | 6.21E-02 |
| 6 | rs9258225  | 29712704 | G | 0.08 | 0.09 | A | 0.82 | 0.69 | 0.97 | 1.87E-02 | 1.64E-02 |
| 6 | rs1633091  | 29712866 | A | 0.18 | 0.19 | G | 0.96 | 0.85 | 1.08 | 4.78E-01 | 4.46E-01 |
| 6 | rs34260811 | 29715332 | A | 0.30 | 0.25 | C | 1.26 | 1.14 | 1.40 | 1.14E-05 | 1.49E-05 |

|   |            |          |   |      |      |   |      |      |      |          |          |
|---|------------|----------|---|------|------|---|------|------|------|----------|----------|
| 6 | rs1633085  | 29715997 | A | 0.47 | 0.43 | G | 1.18 | 1.07 | 1.29 | 4.78E-04 | 6.60E-04 |
| 6 | rs1610621  | 29718790 | T | 0.20 | 0.22 | C | 0.85 | 0.76 | 0.95 | 3.74E-03 | 5.11E-03 |
| 6 | rs909728   | 29719561 | A | 0.47 | 0.43 | G | 1.18 | 1.08 | 1.29 | 4.12E-04 | 5.79E-04 |
| 6 | rs4713244  | 29721146 | A | 0.29 | 0.24 | G | 1.28 | 1.16 | 1.42 | 1.57E-06 | 2.13E-06 |
| 6 | rs1611297  | 29721755 | C | 0.18 | 0.19 | T | 0.94 | 0.84 | 1.06 | 3.41E-01 | 3.14E-01 |
| 6 | rs17438538 | 29723144 | C | 0.03 | 0.03 | T | 0.92 | 0.71 | 1.19 | 5.40E-01 | 6.01E-01 |
| 6 | rs9258260  | 29723161 | T | 0.07 | 0.09 | C | 0.82 | 0.69 | 0.97 | 2.01E-02 | 1.72E-02 |
| 6 | rs1633068  | 29724310 | A | 0.18 | 0.19 | G | 0.94 | 0.84 | 1.06 | 3.35E-01 | 3.08E-01 |
| 6 | rs1737078  | 29724939 | A | 0.44 | 0.46 | C | 0.92 | 0.84 | 1.01 | 6.89E-02 | 8.68E-02 |
| 6 | rs1737076  | 29725321 | C | 0.44 | 0.46 | T | 0.92 | 0.84 | 1.01 | 7.04E-02 | 8.90E-02 |
| 6 | rs1633059  | 29726550 | G | 0.52 | 0.49 | A | 1.13 | 1.03 | 1.24 | 7.68E-03 | 1.03E-02 |
| 6 | rs1610628  | 29728209 | G | 0.18 | 0.19 | T | 0.95 | 0.84 | 1.07 | 3.59E-01 | 3.34E-01 |
| 6 | rs1610630  | 29729286 | G | 0.18 | 0.19 | A | 0.95 | 0.84 | 1.07 | 3.67E-01 | 3.37E-01 |
| 6 | rs9258275  | 29730504 | G | 0.39 | 0.36 | A | 1.14 | 1.03 | 1.25 | 8.24E-03 | 1.02E-02 |
| 6 | rs1633048  | 29730642 | T | 0.18 | 0.19 | C | 0.94 | 0.84 | 1.06 | 3.40E-01 | 3.14E-01 |
| 6 | rs1737069  | 29730730 | A | 0.25 | 0.28 | G | 0.88 | 0.80 | 0.98 | 2.21E-02 | 1.71E-02 |
| 6 | rs1611285  | 29731787 | C | 0.19 | 0.17 | T | 1.12 | 0.99 | 1.26 | 7.19E-02 | 6.32E-02 |
| 6 | rs1737060  | 29732969 | C | 0.18 | 0.19 | G | 0.94 | 0.83 | 1.06 | 2.86E-01 | 2.61E-01 |
| 6 | rs1633041  | 29733223 | T | 0.25 | 0.29 | C | 0.82 | 0.74 | 0.91 | 1.28E-04 | 1.62E-04 |
| 6 | rs1737058  | 29733375 | C | 0.07 | 0.07 | G | 0.97 | 0.80 | 1.17 | 7.39E-01 | 6.97E-01 |
| 6 | rs2735046  | 29734098 | T | 0.47 | 0.40 | C | 1.33 | 1.21 | 1.46 | 1.59E-09 | 1.49E-09 |
| 6 | rs1737046  | 29735693 | T | 0.27 | 0.29 | C | 0.90 | 0.81 | 1.00 | 4.24E-02 | 3.66E-02 |
| 6 | rs1737041  | 29736229 | T | 0.25 | 0.29 | G | 0.82 | 0.74 | 0.91 | 1.69E-04 | 2.11E-04 |
| 6 | rs11753872 | 29736942 | A | 0.02 | 0.02 | C | 0.68 | 0.48 | 0.95 | 2.24E-02 | 2.21E-02 |
| 6 | rs1737031  | 29737481 | A | 0.26 | 0.31 | G | 0.80 | 0.72 | 0.88 | 1.02E-05 | 1.31E-05 |
| 6 | rs6932033  | 29737846 | G | 0.02 | 0.02 | A | 0.69 | 0.49 | 0.98 | 3.48E-02 | 3.44E-02 |
| 6 | rs12662393 | 29738569 | T | 0.02 | 0.03 | G | 0.80 | 0.60 | 1.06 | 1.22E-01 | 1.08E-01 |
| 6 | rs9258302  | 29741338 | C | 0.06 | 0.07 | T | 0.84 | 0.70 | 1.02 | 7.36E-02 | 7.37E-02 |
| 6 | rs1362070  | 29742299 | G | 0.30 | 0.35 | A | 0.79 | 0.72 | 0.87 | 1.95E-06 | 2.21E-06 |
| 6 | rs9258303  | 29742930 | T | 0.06 | 0.07 | C | 0.84 | 0.69 | 1.01 | 6.32E-02 | 6.39E-02 |
| 6 | rs9500845  | 29743117 | G | 0.02 | 0.03 | A | 0.79 | 0.60 | 1.06 | 1.13E-01 | 1.01E-01 |
| 6 | rs2517930  | 29745075 | A | 0.41 | 0.33 | C | 1.38 | 1.26 | 1.51 | 6.14E-12 | 8.41E-12 |
| 6 | rs2844836  | 29746023 | G | 0.04 | 0.04 | A | 0.86 | 0.68 | 1.10 | 2.29E-01 | 2.75E-01 |
| 6 | rs1633021  | 29746869 | G | 0.20 | 0.24 | A | 0.82 | 0.73 | 0.91 | 3.79E-04 | 4.86E-04 |

|   |            |          |   |      |      |   |      |      |      |          |          |
|---|------------|----------|---|------|------|---|------|------|------|----------|----------|
| 6 | rs2735042  | 29747373 | C | 0.26 | 0.31 | T | 0.80 | 0.72 | 0.88 | 1.22E-05 | 1.56E-05 |
| 6 | rs17185076 | 29747389 | T | 0.04 | 0.06 | C | 0.74 | 0.59 | 0.92 | 5.80E-03 | 5.20E-03 |
| 6 | rs2394686  | 29749292 | G | 0.03 | 0.03 | C | 0.84 | 0.63 | 1.11 | 2.09E-01 | 2.51E-01 |
| 6 | rs1002046  | 29754016 | T | 0.25 | 0.29 | C | 0.82 | 0.74 | 0.91 | 2.10E-04 | 2.63E-04 |
| 6 | rs1610642  | 29759078 | A | 0.29 | 0.34 | G | 0.79 | 0.72 | 0.87 | 2.81E-06 | 3.18E-06 |
| 6 | rs1610644  | 29759445 | A | 0.25 | 0.29 | G | 0.82 | 0.74 | 0.91 | 1.69E-04 | 2.11E-04 |
| 6 | rs17185132 | 29759511 | T | 0.02 | 0.02 | C | 0.93 | 0.68 | 1.27 | 6.50E-01 | 5.49E-01 |
| 6 | rs35728173 | 29761652 | T | 0.02 | 0.02 | C | 0.69 | 0.49 | 0.98 | 3.50E-02 | 3.37E-02 |
| 6 | rs16895757 | 29762178 | T | 0.05 | 0.06 | C | 0.86 | 0.70 | 1.06 | 1.51E-01 | 1.49E-01 |
| 6 | rs1633011  | 29762693 | A | 0.25 | 0.29 | G | 0.82 | 0.74 | 0.91 | 2.00E-04 | 2.55E-04 |
| 6 | rs11758087 | 29764443 | A | 0.02 | 0.02 | G | 0.68 | 0.49 | 0.96 | 2.54E-02 | 2.47E-02 |
| 6 | rs2523414  | 29765087 | G | 0.06 | 0.07 | A | 0.86 | 0.71 | 1.04 | 1.19E-01 | 1.11E-01 |
| 6 | rs1736991  | 29766926 | G | 0.27 | 0.32 | C | 0.80 | 0.72 | 0.88 | 1.29E-05 | 1.60E-05 |
| 6 | rs9258437  | 29767611 | A | 0.02 | 0.03 | G | 0.75 | 0.55 | 1.03 | 7.86E-02 | 1.02E-01 |
| 6 | rs28634576 | 29767743 | G | 0.02 | 0.03 | A | 0.78 | 0.58 | 1.05 | 1.05E-01 | 8.65E-02 |
| 6 | rs7741100  | 29768123 | A | 0.05 | 0.05 | C | 0.92 | 0.75 | 1.14 | 4.67E-01 | 4.53E-01 |
| 6 | rs1611185  | 29768344 | C | 0.48 | 0.42 | T | 1.31 | 1.19 | 1.44 | 9.63E-09 | 8.68E-09 |
| 6 | rs2017525  | 29768503 | A | 0.05 | 0.06 | G | 0.81 | 0.67 | 0.99 | 3.80E-02 | 3.91E-02 |
| 6 | rs1632988  | 29772395 | T | 0.23 | 0.28 | C | 0.79 | 0.71 | 0.88 | 1.57E-05 | 1.91E-05 |
| 6 | rs17178826 | 29773537 | G | 0.02 | 0.02 | A | 0.68 | 0.49 | 0.96 | 2.56E-02 | 2.49E-02 |
| 6 | rs9468630  | 29773541 | A | 0.02 | 0.03 | G | 0.80 | 0.61 | 1.07 | 1.34E-01 | 1.22E-01 |
| 6 | rs9258447  | 29773852 | T | 0.07 | 0.08 | C | 0.84 | 0.71 | 1.00 | 4.68E-02 | 5.04E-02 |
| 6 | rs11757182 | 29775525 | C | 0.02 | 0.02 | A | 0.68 | 0.49 | 0.96 | 2.57E-02 | 2.50E-02 |
| 6 | rs9468632  | 29775939 | T | 0.02 | 0.03 | C | 0.81 | 0.61 | 1.08 | 1.57E-01 | 1.37E-01 |
| 6 | rs1736971  | 29776322 | A | 0.25 | 0.29 | C | 0.82 | 0.74 | 0.91 | 1.80E-04 | 2.21E-04 |
| 6 | rs1632971  | 29777911 | A | 0.15 | 0.15 | G | 1.00 | 0.88 | 1.14 | 9.83E-01 | 9.65E-01 |
| 6 | rs9295820  | 29778501 | G | 0.01 | 0.01 | C | 0.94 | 0.61 | 1.46 | 7.96E-01 | 6.78E-01 |
| 6 | rs1610699  | 29778987 | C | 0.27 | 0.32 | A | 0.79 | 0.72 | 0.88 | 6.38E-06 | 7.48E-06 |
| 6 | rs9258468  | 29781328 | A | 0.02 | 0.02 | G | 0.95 | 0.67 | 1.34 | 7.70E-01 | 7.47E-01 |
| 6 | rs1610707  | 29782048 | T | 0.30 | 0.35 | G | 0.80 | 0.72 | 0.88 | 6.61E-06 | 9.25E-06 |
| 6 | rs11753629 | 29782331 | A | 0.10 | 0.13 | G | 0.78 | 0.67 | 0.90 | 7.35E-04 | 6.66E-04 |
| 6 | rs11753654 | 29782621 | T | 0.07 | 0.09 | C | 0.77 | 0.65 | 0.92 | 3.35E-03 | 3.40E-03 |
| 6 | rs1736956  | 29782690 | T | 0.35 | 0.42 | C | 0.75 | 0.68 | 0.83 | 3.53E-09 | 4.47E-09 |
| 6 | rs1619379  | 29785235 | A | 0.35 | 0.40 | G | 0.79 | 0.72 | 0.86 | 6.30E-07 | 6.93E-07 |

|   |            |          |   |      |      |   |      |      |      |          |          |
|---|------------|----------|---|------|------|---|------|------|------|----------|----------|
| 6 | rs2743931  | 29787072 | G | 0.15 | 0.15 | A | 1.00 | 0.88 | 1.14 | 9.99E-01 | 9.48E-01 |
| 6 | rs1155143  | 29788392 | C | 0.26 | 0.30 | T | 0.80 | 0.72 | 0.88 | 1.78E-05 | 2.25E-05 |
| 6 | rs1611149  | 29789999 | T | 0.41 | 0.49 | C | 0.74 | 0.68 | 0.81 | 1.42E-10 | 1.60E-10 |
| 6 | rs1611139  | 29799116 | T | 0.26 | 0.31 | G | 0.82 | 0.74 | 0.91 | 1.08E-04 | 1.47E-04 |
| 6 | rs11753296 | 29801110 | A | 0.11 | 0.13 | G | 0.79 | 0.68 | 0.91 | 1.03E-03 | 7.38E-04 |
| 6 | rs16896052 | 29804176 | G | 0.05 | 0.06 | A | 0.87 | 0.70 | 1.07 | 1.91E-01 | 1.81E-01 |
| 6 | rs2394178  | 29804845 | A | 0.19 | 0.23 | G | 0.77 | 0.69 | 0.86 | 5.70E-06 | 3.64E-06 |
| 6 | rs2394180  | 29805199 | C | 0.11 | 0.13 | T | 0.79 | 0.68 | 0.91 | 1.01E-03 | 7.30E-04 |
| 6 | rs9258525  | 29806341 | C | 0.05 | 0.05 | T | 0.92 | 0.74 | 1.13 | 4.16E-01 | 4.03E-01 |
| 6 | rs2523779  | 29806622 | A | 0.08 | 0.10 | G | 0.80 | 0.68 | 0.95 | 8.22E-03 | 7.67E-03 |
| 6 | rs2743937  | 29807923 | G | 0.19 | 0.23 | A | 0.77 | 0.69 | 0.86 | 6.20E-06 | 3.94E-06 |
| 6 | rs2735003  | 29808634 | C | 0.19 | 0.23 | A | 0.77 | 0.69 | 0.86 | 6.66E-06 | 4.32E-06 |
| 6 | rs9258537  | 29808861 | A | 0.19 | 0.23 | G | 0.77 | 0.69 | 0.86 | 6.79E-06 | 4.33E-06 |
| 6 | rs2734999  | 29808917 | A | 0.08 | 0.10 | G | 0.80 | 0.68 | 0.95 | 8.12E-03 | 7.57E-03 |
| 6 | rs2523777  | 29809087 | A | 0.19 | 0.23 | G | 0.77 | 0.69 | 0.86 | 6.87E-06 | 4.38E-06 |
| 6 | rs2523776  | 29809194 | C | 0.08 | 0.10 | A | 0.81 | 0.69 | 0.95 | 8.71E-03 | 8.16E-03 |
| 6 | rs1611133  | 29809382 | T | 0.20 | 0.23 | C | 0.83 | 0.75 | 0.93 | 1.34E-03 | 1.78E-03 |
| 6 | rs2523769  | 29811022 | G | 0.24 | 0.29 | T | 0.77 | 0.69 | 0.85 | 5.22E-07 | 3.12E-07 |
| 6 | rs16896081 | 29811709 | T | 0.05 | 0.06 | C | 0.83 | 0.67 | 1.02 | 7.63E-02 | 7.26E-02 |
| 6 | rs2734994  | 29812030 | A | 0.08 | 0.10 | G | 0.80 | 0.68 | 0.94 | 6.03E-03 | 5.64E-03 |
| 6 | rs5013310  | 29812404 | T | 0.12 | 0.14 | C | 0.80 | 0.70 | 0.92 | 1.52E-03 | 1.29E-03 |
| 6 | rs2523767  | 29812807 | C | 0.20 | 0.25 | T | 0.79 | 0.70 | 0.88 | 1.78E-05 | 1.37E-05 |
| 6 | rs2517879  | 29812974 | T | 0.20 | 0.25 | C | 0.79 | 0.70 | 0.88 | 1.68E-05 | 1.27E-05 |
| 6 | rs9258555  | 29813016 | C | 0.08 | 0.10 | G | 0.80 | 0.68 | 0.94 | 6.44E-03 | 6.07E-03 |
| 6 | rs3873260  | 29813682 | C | 0.20 | 0.25 | T | 0.78 | 0.70 | 0.87 | 8.78E-06 | 6.77E-06 |
| 6 | rs9258557  | 29813942 | T | 0.08 | 0.10 | C | 0.81 | 0.69 | 0.95 | 1.06E-02 | 9.83E-03 |
| 6 | rs2394185  | 29816371 | G | 0.06 | 0.07 | T | 0.84 | 0.69 | 1.01 | 6.81E-02 | 6.28E-02 |
| 6 | rs2734986  | 29818568 | G | 0.12 | 0.16 | A | 0.76 | 0.66 | 0.87 | 4.43E-05 | 5.55E-05 |
| 6 | rs2734985  | 29818662 | G | 0.18 | 0.23 | A | 0.74 | 0.66 | 0.84 | 6.51E-07 | 6.78E-07 |
| 6 | rs2523759  | 29819093 | C | 0.18 | 0.23 | T | 0.77 | 0.68 | 0.86 | 5.82E-06 | 5.92E-06 |
| 6 | rs2508050  | 29820047 | G | 0.08 | 0.09 | A | 0.89 | 0.75 | 1.05 | 1.52E-01 | 1.74E-01 |
| 6 | rs5013093  | 29820586 | T | 0.18 | 0.23 | C | 0.77 | 0.69 | 0.86 | 7.59E-06 | 7.89E-06 |
| 6 | rs2734984  | 29820831 | G | 0.18 | 0.23 | A | 0.76 | 0.68 | 0.86 | 3.52E-06 | 3.60E-06 |
| 6 | rs2517861  | 29821982 | A | 0.18 | 0.23 | G | 0.74 | 0.66 | 0.83 | 4.87E-07 | 5.18E-07 |

|   |            |          |   |      |      |   |      |      |      |          |          |
|---|------------|----------|---|------|------|---|------|------|------|----------|----------|
| 6 | rs2975033  | 29822261 | T | 0.38 | 0.29 | C | 1.49 | 1.36 | 1.64 | 2.35E-16 | 1.89E-16 |
| 6 | rs2517855  | 29823164 | T | 0.13 | 0.16 | C | 0.76 | 0.67 | 0.87 | 6.16E-05 | 7.70E-05 |
| 6 | rs2517854  | 29823296 | G | 0.36 | 0.43 | C | 0.74 | 0.67 | 0.81 | 4.51E-10 | 4.15E-10 |
| 6 | rs2844826  | 29823319 | C | 0.36 | 0.43 | T | 0.74 | 0.67 | 0.81 | 2.92E-10 | 2.75E-10 |
| 6 | rs3132726  | 29823606 | T | 0.23 | 0.24 | C | 0.92 | 0.83 | 1.03 | 1.57E-01 | 1.48E-01 |
| 6 | rs1611684  | 29825846 | A | 0.36 | 0.43 | G | 0.74 | 0.67 | 0.81 | 3.52E-10 | 3.25E-10 |
| 6 | rs9258738  | 29827390 | C | 0.23 | 0.27 | A | 0.82 | 0.74 | 0.91 | 1.96E-04 | 1.45E-04 |
| 6 | rs17185692 | 29828316 | A | 0.06 | 0.07 | G | 0.83 | 0.69 | 1.00 | 5.50E-02 | 4.54E-02 |
| 6 | rs1611710  | 29828916 | T | 0.36 | 0.43 | C | 0.74 | 0.67 | 0.81 | 4.31E-10 | 3.86E-10 |
| 6 | rs3094170  | 29829265 | A | 0.15 | 0.14 | G | 1.04 | 0.91 | 1.18 | 5.85E-01 | 6.27E-01 |
| 6 | rs3094169  | 29829986 | A | 0.19 | 0.20 | G | 0.96 | 0.86 | 1.08 | 5.30E-01 | 4.92E-01 |
| 6 | rs7760172  | 29830074 | C | 0.03 | 0.04 | T | 0.79 | 0.61 | 1.02 | 7.07E-02 | 7.77E-02 |
| 6 | rs9258766  | 29830411 | A | 0.23 | 0.27 | G | 0.82 | 0.74 | 0.91 | 2.33E-04 | 1.73E-04 |
| 6 | rs9258771  | 29830652 | G | 0.23 | 0.27 | A | 0.82 | 0.74 | 0.91 | 2.24E-04 | 1.68E-04 |
| 6 | rs1611732  | 29831008 | T | 0.36 | 0.43 | C | 0.74 | 0.68 | 0.82 | 6.69E-10 | 6.10E-10 |
| 6 | rs1611738  | 29831706 | A | 0.13 | 0.16 | C | 0.76 | 0.67 | 0.87 | 6.57E-05 | 8.20E-05 |
| 6 | rs2524035  | 29832332 | T | 0.18 | 0.19 | C | 0.94 | 0.83 | 1.06 | 2.83E-01 | 2.71E-01 |
| 6 | rs7760545  | 29833472 | A | 0.01 | 0.01 | C | 0.85 | 0.53 | 1.37 | 5.10E-01 | 5.01E-01 |
| 6 | rs3094165  | 29833541 | T | 0.29 | 0.31 | C | 0.91 | 0.83 | 1.01 | 7.26E-02 | 6.58E-02 |
| 6 | rs2734973  | 29833948 | A | 0.11 | 0.13 | G | 0.85 | 0.74 | 0.98 | 2.43E-02 | 2.66E-02 |
| 6 | rs2517826  | 29834041 | T | 0.18 | 0.22 | C | 0.80 | 0.71 | 0.90 | 1.46E-04 | 2.09E-04 |
| 6 | rs11967812 | 29835632 | C | 0.05 | 0.05 | T | 0.97 | 0.78 | 1.20 | 7.62E-01 | 8.23E-01 |
| 6 | rs9258866  | 29836524 | A | 0.05 | 0.05 | C | 0.90 | 0.73 | 1.11 | 3.23E-01 | 3.23E-01 |
| 6 | rs3132718  | 29836577 | A | 0.31 | 0.35 | G | 0.86 | 0.78 | 0.94 | 1.78E-03 | 1.42E-03 |
| 6 | rs9258883  | 29837188 | C | 0.23 | 0.25 | T | 0.90 | 0.81 | 1.01 | 6.57E-02 | 6.03E-02 |
| 6 | rs3094654  | 29839816 | A | 0.31 | 0.35 | G | 0.86 | 0.78 | 0.94 | 1.85E-03 | 1.47E-03 |
| 6 | rs9258966  | 29840382 | C | 0.31 | 0.35 | T | 0.85 | 0.77 | 0.94 | 1.49E-03 | 1.18E-03 |
| 6 | rs3132714  | 29840648 | A | 0.31 | 0.35 | G | 0.86 | 0.78 | 0.94 | 1.85E-03 | 1.47E-03 |
| 6 | rs2523809  | 29849619 | A | 0.11 | 0.13 | C | 0.85 | 0.74 | 0.98 | 2.66E-02 | 2.92E-02 |
| 6 | rs2734959  | 29849687 | C | 0.43 | 0.49 | G | 0.81 | 0.74 | 0.88 | 4.21E-06 | 3.27E-06 |
| 6 | rs1611599  | 29853955 | G | 0.04 | 0.04 | A | 0.96 | 0.77 | 1.21 | 7.45E-01 | 8.30E-01 |
| 6 | rs9259705  | 29881038 | C | 0.05 | 0.05 | G | 0.94 | 0.75 | 1.17 | 5.76E-01 | 5.86E-01 |
| 6 | rs2524005  | 29899677 | T | 0.15 | 0.20 | C | 0.75 | 0.66 | 0.84 | 2.43E-06 | 3.86E-06 |
| 6 | rs1062405  | 29913509 | T | 0.05 | 0.05 | C | 0.95 | 0.77 | 1.17 | 6.09E-01 | 5.96E-01 |



|   |            |          |   |      |      |   |      |      |      |          |          |
|---|------------|----------|---|------|------|---|------|------|------|----------|----------|
| 6 | rs2571382  | 29913727 | T | 0.17 | 0.17 | C | 1.03 | 0.91 | 1.16 | 6.88E-01 | 7.23E-01 |
| 6 | rs1655900  | 29916618 | A | 0.12 | 0.16 | G | 0.75 | 0.66 | 0.86 | 3.05E-05 | 4.12E-05 |
| 6 | rs2517715  | 29917439 | G | 0.42 | 0.34 | A | 1.41 | 1.29 | 1.55 | 4.78E-13 | 4.33E-13 |
| 6 | rs404046   | 29923817 | A | 0.07 | 0.09 | G | 0.82 | 0.69 | 0.98 | 2.68E-02 | 2.63E-02 |
| 6 | rs12665039 | 29924779 | C | 0.02 | 0.03 | T | 0.66 | 0.49 | 0.88 | 4.94E-03 | 5.59E-03 |
| 6 | rs429511   | 29924831 | C | 0.13 | 0.16 | T | 0.77 | 0.68 | 0.88 | 1.33E-04 | 1.85E-04 |
| 6 | rs2523940  | 29925817 | C | 0.07 | 0.08 | T | 0.82 | 0.69 | 0.99 | 3.50E-02 | 4.04E-02 |
| 6 | rs9260679  | 29926377 | G | 0.03 | 0.04 | A | 0.79 | 0.61 | 1.02 | 6.82E-02 | 6.52E-02 |
| 6 | rs441808   | 29928137 | A | 0.44 | 0.51 | G | 0.77 | 0.70 | 0.84 | 1.94E-08 | 1.78E-08 |
| 6 | rs2428521  | 29928649 | A | 0.45 | 0.52 | C | 0.76 | 0.70 | 0.84 | 7.89E-09 | 6.47E-09 |
| 6 | rs2517689  | 29929253 | G | 0.45 | 0.52 | A | 0.76 | 0.70 | 0.84 | 7.89E-09 | 6.47E-09 |
| 6 | rs3903160  | 29932897 | T | 0.38 | 0.29 | C | 1.52 | 1.38 | 1.67 | 1.88E-17 | 1.62E-17 |
| 6 | rs6457109  | 29933261 | C | 0.13 | 0.10 | T | 1.41 | 1.22 | 1.62 | 2.22E-06 | 1.66E-06 |
| 6 | rs6457110  | 29933881 | A | 0.48 | 0.40 | T | 1.41 | 1.29 | 1.55 | 2.62E-13 | 2.74E-13 |
| 6 | rs3869062  | 29934891 | G | 0.05 | 0.06 | A | 0.81 | 0.65 | 0.99 | 4.38E-02 | 3.94E-02 |
| 6 | rs3893464  | 29935250 | T | 0.38 | 0.46 | C | 0.71 | 0.64 | 0.78 | 4.12E-13 | 5.10E-13 |
| 6 | rs9260759  | 29935372 | T | 0.09 | 0.11 | C | 0.82 | 0.70 | 0.96 | 1.20E-02 | 1.00E-02 |
| 6 | rs12206499 | 29937127 | G | 0.39 | 0.29 | A | 1.58 | 1.43 | 1.74 | 1.61E-20 | 8.09E-21 |
| 6 | rs2517673  | 29937242 | T | 0.10 | 0.12 | C | 0.79 | 0.68 | 0.91 | 1.74E-03 | 2.27E-03 |
| 6 | rs2256539  | 29937740 | C | 0.36 | 0.42 | T | 0.81 | 0.74 | 0.89 | 9.32E-06 | 8.85E-06 |
| 6 | rs2256543  | 29937833 | T | 0.37 | 0.42 | C | 0.81 | 0.73 | 0.89 | 6.95E-06 | 6.21E-06 |
| 6 | rs1061535  | 29937924 | A | 0.19 | 0.19 | G | 0.97 | 0.86 | 1.09 | 5.62E-01 | 5.20E-01 |
| 6 | rs2523971  | 29938258 | T | 0.22 | 0.26 | G | 0.78 | 0.70 | 0.87 | 5.27E-06 | 5.22E-06 |
| 6 | rs2256919  | 29940750 | C | 0.37 | 0.42 | A | 0.82 | 0.75 | 0.90 | 3.84E-05 | 3.29E-05 |
| 6 | rs2735078  | 29941400 | C | 0.24 | 0.29 | T | 0.77 | 0.69 | 0.86 | 1.30E-06 | 1.29E-06 |
| 6 | rs2523946  | 29941943 | A | 0.53 | 0.46 | G | 1.31 | 1.20 | 1.44 | 8.92E-09 | 5.48E-09 |
| 6 | rs3823355  | 29942083 | T | 0.39 | 0.29 | C | 1.57 | 1.43 | 1.73 | 2.85E-20 | 1.51E-20 |
| 6 | rs2232236  | 29942191 | T | 0.18 | 0.20 | G | 0.93 | 0.83 | 1.05 | 2.37E-01 | 2.16E-01 |
| 6 | rs400488   | 29943035 | T | 0.14 | 0.17 | C | 0.78 | 0.68 | 0.88 | 1.12E-04 | 1.42E-04 |
| 6 | rs6904029  | 29943067 | A | 0.39 | 0.29 | G | 1.56 | 1.42 | 1.72 | 1.13E-19 | 5.84E-20 |
| 6 | rs2735076  | 29943490 | T | 0.24 | 0.25 | C | 0.96 | 0.86 | 1.06 | 4.01E-01 | 4.16E-01 |
| 6 | rs2394250  | 29943656 | T | 0.50 | 0.42 | G | 1.34 | 1.22 | 1.47 | 4.57E-10 | 3.28E-10 |
| 6 | rs2245961  | 29944004 | C | 0.34 | 0.38 | A | 0.86 | 0.79 | 0.95 | 2.60E-03 | 2.60E-03 |
| 6 | rs3823375  | 29944158 | C | 0.42 | 0.33 | T | 1.48 | 1.35 | 1.63 | 4.53E-16 | 3.15E-16 |

|   |            |          |   |      |      |   |      |      |      |          |          |
|---|------------|----------|---|------|------|---|------|------|------|----------|----------|
| 6 | rs2571375  | 29945270 | C | 0.08 | 0.10 | T | 0.79 | 0.67 | 0.93 | 4.33E-03 | 6.02E-03 |
| 6 | rs2246199  | 29945620 | T | 0.09 | 0.10 | C | 0.95 | 0.81 | 1.11 | 5.04E-01 | 5.76E-01 |
| 6 | rs3132685  | 29945949 | T | 0.08 | 0.10 | C | 0.79 | 0.68 | 0.93 | 4.10E-03 | 5.83E-03 |
| 6 | rs2108691  | 29948365 | A | 0.12 | 0.14 | C | 0.87 | 0.76 | 1.00 | 5.14E-02 | 6.87E-02 |
| 6 | rs9260916  | 29948708 | T | 0.05 | 0.05 | C | 0.86 | 0.69 | 1.07 | 1.72E-01 | 1.58E-01 |
| 6 | rs2394255  | 29949821 | G | 0.43 | 0.50 | A | 0.75 | 0.69 | 0.83 | 1.79E-09 | 2.29E-09 |
| 6 | rs401618   | 29950210 | C | 0.22 | 0.26 | T | 0.79 | 0.71 | 0.88 | 2.49E-05 | 2.30E-05 |
| 6 | rs11757750 | 29952162 | C | 0.06 | 0.06 | T | 0.98 | 0.81 | 1.19 | 8.56E-01 | 9.18E-01 |
| 6 | rs17186937 | 29952814 | C | 0.06 | 0.06 | T | 0.98 | 0.81 | 1.19 | 8.66E-01 | 9.27E-01 |
| 6 | rs4947244  | 29954364 | G | 0.37 | 0.28 | C | 1.51 | 1.37 | 1.66 | 1.52E-16 | 1.08E-16 |
| 6 | rs5025708  | 29955199 | G | 0.12 | 0.12 | T | 0.97 | 0.84 | 1.11 | 6.39E-01 | 6.30E-01 |
| 6 | rs12665186 | 29956842 | G | 0.06 | 0.06 | A | 0.98 | 0.81 | 1.18 | 8.16E-01 | 8.80E-01 |
| 6 | rs9260930  | 29956953 | C | 0.05 | 0.05 | T | 0.87 | 0.70 | 1.08 | 2.06E-01 | 1.86E-01 |
| 6 | rs4959039  | 29957069 | G | 0.37 | 0.28 | A | 1.50 | 1.36 | 1.66 | 2.61E-16 | 1.82E-16 |
| 6 | rs12662611 | 29957077 | T | 0.06 | 0.06 | C | 0.98 | 0.81 | 1.18 | 8.16E-01 | 8.80E-01 |
| 6 | rs9260967  | 29961367 | A | 0.11 | 0.12 | G | 0.92 | 0.80 | 1.07 | 2.87E-01 | 2.96E-01 |
| 6 | rs9260984  | 29962268 | A | 0.05 | 0.05 | G | 0.87 | 0.70 | 1.08 | 2.03E-01 | 1.83E-01 |
| 6 | rs6910898  | 29963179 | C | 0.11 | 0.12 | T | 0.93 | 0.80 | 1.08 | 3.21E-01 | 3.32E-01 |
| 6 | rs9261035  | 29966175 | A | 0.05 | 0.05 | G | 0.87 | 0.70 | 1.08 | 2.02E-01 | 1.82E-01 |
| 6 | rs9261040  | 29966620 | G | 0.04 | 0.05 | A | 0.82 | 0.66 | 1.02 | 7.39E-02 | 6.31E-02 |
| 6 | rs356960   | 29968275 | A | 0.06 | 0.07 | G | 0.80 | 0.66 | 0.96 | 1.85E-02 | 2.49E-02 |
| 6 | rs9261082  | 29969199 | T | 0.04 | 0.04 | C | 1.11 | 0.88 | 1.39 | 3.80E-01 | 4.24E-01 |
| 6 | rs7758512  | 29970589 | G | 0.11 | 0.12 | T | 0.92 | 0.80 | 1.07 | 2.76E-01 | 2.86E-01 |
| 6 | rs9261093  | 29970685 | C | 0.05 | 0.05 | T | 0.87 | 0.70 | 1.07 | 1.89E-01 | 1.71E-01 |
| 6 | rs11965524 | 29973187 | A | 0.11 | 0.12 | T | 0.92 | 0.80 | 1.07 | 2.94E-01 | 3.03E-01 |
| 6 | rs9261105  | 29974500 | G | 0.11 | 0.11 | A | 0.93 | 0.80 | 1.08 | 3.35E-01 | 3.44E-01 |
| 6 | rs6940082  | 29975095 | C | 0.05 | 0.05 | G | 0.87 | 0.70 | 1.08 | 1.92E-01 | 1.71E-01 |
| 6 | rs9261108  | 29975587 | A | 0.04 | 0.05 | G | 0.87 | 0.70 | 1.09 | 2.30E-01 | 2.11E-01 |
| 6 | rs9261115  | 29977973 | C | 0.11 | 0.12 | G | 0.92 | 0.80 | 1.07 | 2.87E-01 | 2.96E-01 |
| 6 | rs9261129  | 29979579 | C | 0.11 | 0.11 | T | 0.93 | 0.80 | 1.08 | 3.27E-01 | 3.35E-01 |
| 6 | rs9261130  | 29980445 | A | 0.04 | 0.05 | G | 0.80 | 0.64 | 1.00 | 5.01E-02 | 4.33E-02 |
| 6 | rs16896044 | 29981750 | A | 0.05 | 0.06 | G | 0.83 | 0.67 | 1.02 | 7.41E-02 | 6.89E-02 |
| 6 | rs356954   | 29983538 | G | 0.22 | 0.26 | A | 0.79 | 0.71 | 0.88 | 1.98E-05 | 1.93E-05 |
| 6 | rs9357092  | 29984252 | A | 0.37 | 0.28 | G | 1.52 | 1.38 | 1.68 | 3.18E-17 | 2.42E-17 |

|   |            |          |   |      |      |   |      |      |      |          |          |
|---|------------|----------|---|------|------|---|------|------|------|----------|----------|
| 6 | rs6931776  | 29986427 | G | 0.11 | 0.12 | A | 0.92 | 0.80 | 1.07 | 2.87E-01 | 2.96E-01 |
| 6 | rs165256   | 29986684 | G | 0.12 | 0.14 | A | 0.87 | 0.76 | 1.00 | 5.21E-02 | 7.10E-02 |
| 6 | rs9261151  | 29987738 | A | 0.05 | 0.05 | G | 0.87 | 0.70 | 1.08 | 2.02E-01 | 1.82E-01 |
| 6 | rs3129012  | 29988642 | T | 0.13 | 0.16 | C | 0.77 | 0.68 | 0.88 | 9.91E-05 | 1.32E-04 |
| 6 | rs3891156  | 29988740 | T | 0.05 | 0.05 | C | 0.87 | 0.70 | 1.08 | 2.02E-01 | 1.82E-01 |
| 6 | rs9261154  | 29990937 | T | 0.05 | 0.06 | C | 0.93 | 0.77 | 1.14 | 4.91E-01 | 4.53E-01 |
| 6 | rs1150743  | 29992261 | A | 0.09 | 0.10 | G | 0.86 | 0.74 | 1.01 | 7.24E-02 | 5.61E-02 |
| 6 | rs6925061  | 29992286 | T | 0.05 | 0.05 | C | 0.87 | 0.70 | 1.08 | 2.02E-01 | 1.82E-01 |
| 6 | rs166325   | 29993196 | G | 0.06 | 0.07 | C | 0.79 | 0.65 | 0.95 | 1.45E-02 | 1.91E-02 |
| 6 | rs9261171  | 29996121 | G | 0.05 | 0.05 | A | 0.87 | 0.70 | 1.08 | 2.03E-01 | 1.83E-01 |
| 6 | rs9261174  | 29996855 | C | 0.10 | 0.11 | T | 0.94 | 0.80 | 1.09 | 3.97E-01 | 4.15E-01 |
| 6 | rs9261189  | 30000280 | T | 0.11 | 0.12 | C | 0.93 | 0.80 | 1.07 | 3.07E-01 | 3.16E-01 |
| 6 | rs16896923 | 30000687 | C | 0.05 | 0.06 | T | 0.82 | 0.66 | 1.01 | 6.59E-02 | 5.98E-02 |
| 6 | rs10947046 | 30000973 | G | 0.06 | 0.06 | T | 0.98 | 0.81 | 1.19 | 8.62E-01 | 9.26E-01 |
| 6 | rs9261193  | 30002173 | C | 0.05 | 0.05 | T | 0.87 | 0.70 | 1.08 | 2.03E-01 | 1.83E-01 |
| 6 | rs166327   | 30002881 | G | 0.37 | 0.42 | A | 0.79 | 0.72 | 0.87 | 6.79E-07 | 6.90E-07 |
| 6 | rs3869067  | 30003797 | C | 0.11 | 0.12 | T | 0.92 | 0.80 | 1.07 | 2.87E-01 | 2.96E-01 |
| 6 | rs3869068  | 30004052 | A | 0.11 | 0.12 | G | 0.93 | 0.80 | 1.07 | 3.00E-01 | 3.10E-01 |
| 6 | rs9261203  | 30005043 | G | 0.05 | 0.05 | A | 0.87 | 0.70 | 1.08 | 2.03E-01 | 1.83E-01 |
| 6 | rs4711207  | 30005754 | A | 0.37 | 0.28 | C | 1.56 | 1.41 | 1.72 | 7.11E-19 | 4.77E-19 |
| 6 | rs9261207  | 30006482 | C | 0.05 | 0.05 | T | 0.88 | 0.71 | 1.09 | 2.28E-01 | 2.06E-01 |
| 6 | rs259937   | 30007493 | G | 0.06 | 0.07 | A | 0.79 | 0.66 | 0.96 | 1.57E-02 | 2.08E-02 |
| 6 | rs9261212  | 30008996 | C | 0.13 | 0.13 | T | 0.98 | 0.86 | 1.13 | 8.06E-01 | 7.99E-01 |
| 6 | rs9261216  | 30010139 | G | 0.11 | 0.12 | A | 0.92 | 0.80 | 1.07 | 2.94E-01 | 3.03E-01 |
| 6 | rs259940   | 30011934 | C | 0.22 | 0.26 | T | 0.79 | 0.71 | 0.88 | 1.32E-05 | 1.27E-05 |
| 6 | rs9261224  | 30013887 | T | 0.09 | 0.09 | C | 1.00 | 0.85 | 1.18 | 9.98E-01 | 9.84E-01 |
| 6 | rs259942   | 30015167 | A | 0.13 | 0.16 | G | 0.83 | 0.72 | 0.94 | 4.71E-03 | 5.35E-03 |
| 6 | rs3132128  | 30016190 | C | 0.13 | 0.13 | T | 0.99 | 0.86 | 1.13 | 8.56E-01 | 8.45E-01 |
| 6 | rs7771476  | 30016573 | G | 0.05 | 0.05 | A | 0.87 | 0.70 | 1.08 | 2.02E-01 | 1.82E-01 |
| 6 | rs28570682 | 30021740 | C | 0.04 | 0.04 | T | 1.14 | 0.91 | 1.44 | 2.63E-01 | 2.31E-01 |
| 6 | rs9261256  | 30021941 | G | 0.09 | 0.09 | C | 0.98 | 0.84 | 1.16 | 8.52E-01 | 8.60E-01 |
| 6 | rs7761314  | 30022153 | T | 0.09 | 0.09 | C | 0.98 | 0.84 | 1.16 | 8.44E-01 | 8.52E-01 |
| 6 | rs9261258  | 30022808 | A | 0.09 | 0.09 | G | 0.98 | 0.84 | 1.16 | 8.29E-01 | 8.35E-01 |
| 6 | rs3869070  | 30023868 | C | 0.51 | 0.46 | T | 1.25 | 1.14 | 1.37 | 2.17E-06 | 3.26E-06 |

|   |            |          |   |      |      |   |      |      |      |          |          |
|---|------------|----------|---|------|------|---|------|------|------|----------|----------|
| 6 | rs9366752  | 30024677 | T | 0.31 | 0.23 | C | 1.47 | 1.33 | 1.63 | 1.82E-13 | 1.74E-13 |
| 6 | rs9261263  | 30024749 | G | 0.05 | 0.05 | C | 0.87 | 0.70 | 1.07 | 1.86E-01 | 1.68E-01 |
| 6 | rs259919   | 30025503 | T | 0.28 | 0.31 | C | 0.87 | 0.79 | 0.97 | 7.84E-03 | 8.00E-03 |
| 6 | rs3757333  | 30028606 | A | 0.04 | 0.04 | C | 1.14 | 0.91 | 1.44 | 2.64E-01 | 2.32E-01 |
| 6 | rs1150740  | 30030689 | T | 0.08 | 0.10 | G | 0.78 | 0.67 | 0.92 | 3.54E-03 | 5.03E-03 |
| 6 | rs9261277  | 30031091 | C | 0.09 | 0.09 | T | 0.98 | 0.84 | 1.16 | 8.33E-01 | 8.39E-01 |
| 6 | rs1150739  | 30031345 | G | 0.35 | 0.40 | A | 0.81 | 0.73 | 0.89 | 8.80E-06 | 8.29E-06 |
| 6 | rs8321     | 30032522 | G | 0.08 | 0.09 | T | 0.81 | 0.68 | 0.95 | 1.05E-02 | 1.26E-02 |
| 6 | rs3807031  | 30033884 | A | 0.27 | 0.20 | C | 1.43 | 1.28 | 1.59 | 7.26E-11 | 7.74E-11 |
| 6 | rs9261281  | 30035341 | A | 0.08 | 0.08 | G | 1.00 | 0.85 | 1.18 | 9.97E-01 | 9.48E-01 |
| 6 | rs9261285  | 30036083 | A | 0.05 | 0.05 | C | 0.87 | 0.70 | 1.08 | 2.00E-01 | 1.81E-01 |
| 6 | rs17187693 | 30036333 | C | 0.05 | 0.06 | G | 0.83 | 0.67 | 1.02 | 7.40E-02 | 6.85E-02 |
| 6 | rs17187707 | 30036528 | G | 0.06 | 0.04 | A | 1.58 | 1.28 | 1.95 | 2.30E-05 | 2.44E-05 |
| 6 | rs9261288  | 30037353 | T | 0.04 | 0.04 | C | 0.88 | 0.69 | 1.11 | 2.85E-01 | 2.89E-01 |
| 6 | rs1245371  | 30038352 | C | 0.22 | 0.27 | T | 0.79 | 0.71 | 0.88 | 1.13E-05 | 1.06E-05 |
| 6 | rs9261290  | 30038647 | C | 0.08 | 0.09 | T | 0.81 | 0.68 | 0.95 | 1.05E-02 | 1.27E-02 |
| 6 | rs2301753  | 30039240 | A | 0.11 | 0.12 | C | 0.90 | 0.77 | 1.04 | 1.57E-01 | 1.63E-01 |
| 6 | rs2074480  | 30040810 | C | 0.11 | 0.12 | A | 0.92 | 0.80 | 1.07 | 2.85E-01 | 2.94E-01 |
| 6 | rs2074479  | 30041009 | C | 0.11 | 0.12 | T | 0.92 | 0.80 | 1.07 | 2.87E-01 | 2.96E-01 |
| 6 | rs9261301  | 30041559 | G | 0.52 | 0.46 | A | 1.23 | 1.12 | 1.34 | 1.44E-05 | 1.92E-05 |
| 6 | rs3807034  | 30043992 | C | 0.13 | 0.15 | T | 0.88 | 0.77 | 1.00 | 5.46E-02 | 5.39E-02 |
| 6 | rs3807035  | 30044827 | T | 0.13 | 0.14 | C | 0.88 | 0.77 | 1.01 | 6.24E-02 | 6.03E-02 |
| 6 | rs1150735  | 30045199 | T | 0.30 | 0.36 | C | 0.77 | 0.70 | 0.85 | 1.93E-07 | 2.03E-07 |
| 6 | rs2394734  | 30046246 | A | 0.16 | 0.18 | G | 0.83 | 0.74 | 0.94 | 3.32E-03 | 3.59E-03 |
| 6 | rs1150733  | 30046427 | T | 0.03 | 0.04 | C | 0.90 | 0.70 | 1.15 | 3.89E-01 | 4.22E-01 |
| 6 | rs4711209  | 30047403 | A | 0.37 | 0.28 | G | 1.52 | 1.38 | 1.67 | 4.28E-17 | 3.20E-17 |
| 6 | rs9261316  | 30047837 | A | 0.05 | 0.05 | G | 0.87 | 0.70 | 1.08 | 2.12E-01 | 1.92E-01 |
| 6 | rs9261317  | 30048305 | T | 0.05 | 0.05 | A | 0.87 | 0.70 | 1.08 | 2.03E-01 | 1.83E-01 |
| 6 | rs6909253  | 30055643 | G | 0.51 | 0.42 | T | 1.42 | 1.30 | 1.56 | 4.39E-14 | 6.80E-14 |
| 6 | rs9261361  | 30055933 | G | 0.05 | 0.05 | A | 0.87 | 0.70 | 1.08 | 1.99E-01 | 1.80E-01 |
| 6 | rs1264708  | 30057154 | C | 0.20 | 0.23 | T | 0.82 | 0.73 | 0.92 | 5.16E-04 | 5.04E-04 |
| 6 | rs9261371  | 30058988 | T | 0.13 | 0.14 | C | 0.86 | 0.75 | 0.98 | 2.84E-02 | 2.87E-02 |
| 6 | rs9261375  | 30059451 | G | 0.05 | 0.05 | A | 0.88 | 0.71 | 1.09 | 2.43E-01 | 2.21E-01 |
| 6 | rs7753935  | 30060783 | A | 0.13 | 0.16 | C | 0.81 | 0.71 | 0.92 | 1.64E-03 | 1.96E-03 |

|   |            |          |   |      |      |   |      |      |      |          |          |
|---|------------|----------|---|------|------|---|------|------|------|----------|----------|
| 6 | rs17187805 | 30061202 | A | 0.13 | 0.16 | G | 0.81 | 0.71 | 0.92 | 1.70E-03 | 2.01E-03 |
| 6 | rs9261387  | 30061361 | T | 0.09 | 0.09 | C | 1.03 | 0.88 | 1.21 | 7.34E-01 | 7.41E-01 |
| 6 | rs6923832  | 30062058 | A | 0.05 | 0.05 | G | 0.87 | 0.70 | 1.08 | 1.97E-01 | 1.77E-01 |
| 6 | rs7765810  | 30063496 | A | 0.16 | 0.20 | C | 0.79 | 0.70 | 0.89 | 1.33E-04 | 1.78E-04 |
| 6 | rs1264706  | 30063652 | G | 0.08 | 0.10 | C | 0.81 | 0.69 | 0.96 | 1.38E-02 | 1.68E-02 |
| 6 | rs9261394  | 30064562 | A | 0.51 | 0.42 | G | 1.43 | 1.31 | 1.57 | 1.73E-14 | 3.30E-14 |
| 6 | rs1264704  | 30065319 | T | 0.25 | 0.29 | C | 0.81 | 0.73 | 0.90 | 9.45E-05 | 8.47E-05 |
| 6 | rs1264702  | 30065575 | G | 0.19 | 0.23 | A | 0.82 | 0.74 | 0.92 | 6.52E-04 | 9.58E-04 |
| 6 | rs916570   | 30066031 | C | 0.22 | 0.26 | T | 0.79 | 0.71 | 0.88 | 1.21E-05 | 1.90E-05 |
| 6 | rs1264701  | 30066358 | A | 0.17 | 0.19 | C | 0.86 | 0.76 | 0.97 | 1.51E-02 | 1.44E-02 |
| 6 | rs1264695  | 30067892 | C | 0.20 | 0.24 | T | 0.82 | 0.73 | 0.91 | 3.18E-04 | 4.92E-04 |
| 6 | rs9261403  | 30069525 | T | 0.04 | 0.05 | G | 0.80 | 0.63 | 1.00 | 5.36E-02 | 5.32E-02 |
| 6 | rs1116221  | 30071330 | A | 0.22 | 0.26 | G | 0.79 | 0.71 | 0.88 | 2.24E-05 | 4.38E-05 |
| 6 | rs11964542 | 30071760 | C | 0.03 | 0.03 | T | 1.27 | 0.98 | 1.66 | 7.38E-02 | 5.94E-02 |
| 6 | rs2844796  | 30072511 | T | 0.20 | 0.23 | C | 0.83 | 0.74 | 0.93 | 1.07E-03 | 1.65E-03 |
| 6 | rs3132680  | 30073195 | T | 0.39 | 0.32 | G | 1.31 | 1.19 | 1.44 | 2.62E-08 | 3.02E-08 |
| 6 | rs2844795  | 30073847 | G | 0.49 | 0.44 | A | 1.22 | 1.12 | 1.34 | 1.73E-05 | 1.74E-05 |
| 6 | rs3132679  | 30075843 | A | 0.16 | 0.15 | G | 1.08 | 0.95 | 1.23 | 2.28E-01 | 2.30E-01 |
| 6 | rs2023472  | 30075864 | T | 0.40 | 0.39 | C | 1.05 | 0.96 | 1.15 | 3.01E-01 | 2.87E-01 |
| 6 | rs2074483  | 30076755 | T | 0.36 | 0.40 | C | 0.86 | 0.78 | 0.94 | 1.51E-03 | 2.39E-03 |
| 6 | rs9378220  | 30077135 | A | 0.13 | 0.16 | C | 0.78 | 0.68 | 0.89 | 2.22E-04 | 1.35E-04 |
| 6 | rs2523990  | 30077229 | T | 0.44 | 0.47 | C | 0.86 | 0.79 | 0.95 | 2.05E-03 | 1.49E-03 |
| 6 | rs4959041  | 30077967 | C | 0.38 | 0.30 | T | 1.44 | 1.31 | 1.59 | 4.26E-14 | 4.82E-14 |
| 6 | rs2523989  | 30078275 | A | 0.11 | 0.14 | G | 0.79 | 0.69 | 0.91 | 1.17E-03 | 1.67E-03 |
| 6 | rs2523987  | 30079993 | G | 0.10 | 0.13 | T | 0.81 | 0.70 | 0.94 | 4.78E-03 | 5.63E-03 |
| 6 | rs3734838  | 30080231 | A | 0.07 | 0.09 | G | 0.73 | 0.61 | 0.87 | 4.86E-04 | 5.93E-04 |
| 6 | rs2517598  | 30080274 | T | 0.12 | 0.14 | C | 0.79 | 0.69 | 0.90 | 6.70E-04 | 1.02E-03 |
| 6 | rs2523984  | 30082003 | A | 0.12 | 0.14 | G | 0.79 | 0.69 | 0.90 | 6.83E-04 | 1.06E-03 |
| 6 | rs2245420  | 30082688 | C | 0.12 | 0.14 | G | 0.79 | 0.69 | 0.91 | 8.89E-04 | 1.32E-03 |
| 6 | rs2523981  | 30083182 | A | 0.10 | 0.13 | G | 0.80 | 0.69 | 0.93 | 2.57E-03 | 3.25E-03 |
| 6 | rs2523979  | 30083515 | T | 0.10 | 0.13 | A | 0.81 | 0.70 | 0.93 | 3.66E-03 | 4.60E-03 |
| 6 | rs9261434  | 30087776 | G | 0.12 | 0.12 | C | 1.00 | 0.87 | 1.15 | 9.69E-01 | 9.57E-01 |
| 6 | rs9261441  | 30091758 | A | 0.09 | 0.12 | G | 0.70 | 0.60 | 0.82 | 7.60E-06 | 1.09E-05 |
| 6 | rs17455565 | 30092308 | A | 0.01 | 0.02 | T | 0.65 | 0.43 | 0.97 | 3.27E-02 | 5.01E-02 |

|   |            |          |   |      |      |   |      |      |      |          |          |
|---|------------|----------|---|------|------|---|------|------|------|----------|----------|
| 6 | rs1419675  | 30092707 | C | 0.25 | 0.26 | A | 0.97 | 0.88 | 1.08 | 6.23E-01 | 6.47E-01 |
| 6 | rs1419674  | 30092935 | A | 0.03 | 0.03 | C | 0.96 | 0.75 | 1.23 | 7.41E-01 | 7.81E-01 |
| 6 | rs2517592  | 30093137 | A | 0.19 | 0.24 | G | 0.74 | 0.66 | 0.83 | 2.52E-07 | 4.32E-07 |
| 6 | rs10947055 | 30093364 | C | 0.09 | 0.07 | T | 1.30 | 1.10 | 1.53 | 2.02E-03 | 1.75E-03 |
| 6 | rs9261442  | 30093744 | G | 0.29 | 0.23 | A | 1.35 | 1.21 | 1.49 | 1.29E-08 | 1.29E-08 |
| 6 | rs9261444  | 30094611 | T | 0.29 | 0.23 | C | 1.34 | 1.21 | 1.49 | 2.15E-08 | 2.26E-08 |
| 6 | rs9261447  | 30095202 | C | 0.30 | 0.25 | T | 1.30 | 1.18 | 1.44 | 2.49E-07 | 2.13E-07 |
| 6 | rs9261448  | 30095329 | C | 0.29 | 0.23 | T | 1.36 | 1.23 | 1.51 | 4.23E-09 | 4.51E-09 |
| 6 | rs10947056 | 30095603 | G | 0.09 | 0.07 | C | 1.29 | 1.09 | 1.53 | 2.47E-03 | 2.14E-03 |
| 6 | rs9261450  | 30097818 | G | 0.30 | 0.25 | A | 1.31 | 1.18 | 1.45 | 2.07E-07 | 1.69E-07 |
| 6 | rs757263   | 30098323 | A | 0.30 | 0.25 | G | 1.31 | 1.18 | 1.45 | 1.96E-07 | 1.61E-07 |
| 6 | rs9261453  | 30099948 | G | 0.30 | 0.25 | A | 1.31 | 1.18 | 1.45 | 2.16E-07 | 1.82E-07 |
| 6 | rs9261455  | 30099996 | G | 0.30 | 0.25 | T | 1.31 | 1.18 | 1.45 | 2.16E-07 | 1.82E-07 |
| 6 | rs1362104  | 30101656 | T | 0.31 | 0.38 | C | 0.74 | 0.67 | 0.82 | 1.57E-09 | 1.14E-09 |
| 6 | rs1541268  | 30103394 | C | 0.29 | 0.24 | T | 1.34 | 1.21 | 1.48 | 2.33E-08 | 2.49E-08 |
| 6 | rs2021723  | 30103923 | T | 0.13 | 0.13 | C | 0.95 | 0.83 | 1.09 | 5.05E-01 | 5.22E-01 |
| 6 | rs9261468  | 30104480 | G | 0.29 | 0.23 | A | 1.35 | 1.22 | 1.50 | 9.75E-09 | 1.01E-08 |
| 6 | rs2107202  | 30105743 | A | 0.25 | 0.26 | G | 0.98 | 0.88 | 1.09 | 7.13E-01 | 7.42E-01 |
| 6 | rs2857440  | 30106493 | C | 0.29 | 0.24 | T | 1.33 | 1.20 | 1.48 | 3.46E-08 | 3.58E-08 |
| 6 | rs9261487  | 30109207 | A | 0.02 | 0.02 | C | 0.73 | 0.51 | 1.02 | 6.65E-02 | 8.60E-02 |
| 6 | rs9261488  | 30109412 | T | 0.29 | 0.23 | C | 1.34 | 1.21 | 1.49 | 1.98E-08 | 2.00E-08 |
| 6 | rs9261492  | 30110058 | A | 0.31 | 0.25 | G | 1.29 | 1.16 | 1.42 | 9.15E-07 | 9.32E-07 |
| 6 | rs9261505  | 30112408 | G | 0.29 | 0.23 | A | 1.34 | 1.21 | 1.49 | 1.66E-08 | 1.64E-08 |
| 6 | rs9261511  | 30113245 | A | 0.29 | 0.23 | C | 1.36 | 1.22 | 1.51 | 5.62E-09 | 5.84E-09 |
| 6 | rs3815081  | 30114074 | C | 0.13 | 0.15 | T | 0.84 | 0.74 | 0.96 | 1.16E-02 | 7.59E-03 |
| 6 | rs757262   | 30114955 | A | 0.29 | 0.23 | G | 1.34 | 1.21 | 1.49 | 2.09E-08 | 2.05E-08 |
| 6 | rs757260   | 30115204 | A | 0.13 | 0.10 | G | 1.30 | 1.13 | 1.50 | 2.86E-04 | 2.93E-04 |
| 6 | rs757259   | 30115542 | T | 0.29 | 0.23 | C | 1.34 | 1.21 | 1.48 | 3.05E-08 | 3.02E-08 |
| 6 | rs3132676  | 30116078 | T | 0.16 | 0.16 | C | 1.02 | 0.90 | 1.15 | 7.73E-01 | 7.52E-01 |
| 6 | rs9261519  | 30117101 | C | 0.31 | 0.25 | T | 1.29 | 1.17 | 1.43 | 5.74E-07 | 5.83E-07 |
| 6 | rs1557611  | 30118360 | A | 0.29 | 0.23 | G | 1.34 | 1.20 | 1.48 | 3.39E-08 | 3.42E-08 |
| 6 | rs1557608  | 30118582 | C | 0.34 | 0.29 | A | 1.26 | 1.15 | 1.39 | 2.08E-06 | 2.01E-06 |
| 6 | rs1557607  | 30118637 | C | 0.29 | 0.23 | T | 1.34 | 1.21 | 1.48 | 2.45E-08 | 2.38E-08 |
| 6 | rs9468692  | 30119890 | T | 0.09 | 0.07 | G | 1.30 | 1.10 | 1.53 | 2.10E-03 | 2.06E-03 |

|   |            |          |   |      |      |   |      |      |      |          |          |
|---|------------|----------|---|------|------|---|------|------|------|----------|----------|
| 6 | rs2257914  | 30120563 | T | 0.13 | 0.14 | G | 0.95 | 0.83 | 1.09 | 4.70E-01 | 4.97E-01 |
| 6 | rs2022065  | 30121460 | A | 0.35 | 0.31 | G | 1.19 | 1.08 | 1.32 | 3.40E-04 | 3.16E-04 |
| 6 | rs3734840  | 30121605 | C | 0.17 | 0.20 | T | 0.81 | 0.72 | 0.92 | 7.56E-04 | 4.44E-04 |
| 6 | rs2517646  | 30122575 | G | 0.35 | 0.35 | A | 1.01 | 0.92 | 1.11 | 7.90E-01 | 7.15E-01 |
| 6 | rs9261535  | 30127323 | A | 0.29 | 0.23 | G | 1.35 | 1.22 | 1.50 | 1.12E-08 | 1.11E-08 |
| 6 | rs12212092 | 30128442 | T | 0.09 | 0.07 | C | 1.19 | 1.01 | 1.41 | 4.40E-02 | 4.30E-02 |
| 6 | rs9261536  | 30131349 | T | 0.12 | 0.12 | C | 0.99 | 0.86 | 1.14 | 8.88E-01 | 8.90E-01 |
| 6 | rs17188127 | 30135102 | T | 0.02 | 0.02 | C | 1.37 | 0.97 | 1.92 | 7.32E-02 | 6.90E-02 |
| 6 | rs9368624  | 30135977 | A | 0.15 | 0.18 | G | 0.81 | 0.72 | 0.92 | 1.36E-03 | 1.03E-03 |
| 6 | rs929157   | 30137209 | T | 0.12 | 0.13 | C | 0.90 | 0.78 | 1.04 | 1.43E-01 | 1.65E-01 |
| 6 | rs2074475  | 30137890 | G | 0.01 | 0.02 | A | 0.70 | 0.47 | 1.05 | 8.49E-02 | 8.33E-02 |
| 6 | rs1029238  | 30138645 | T | 0.09 | 0.11 | C | 0.78 | 0.67 | 0.91 | 1.98E-03 | 1.84E-03 |
| 6 | rs929156   | 30139699 | T | 0.31 | 0.25 | C | 1.31 | 1.19 | 1.45 | 1.31E-07 | 1.20E-07 |
| 6 | rs6905949  | 30140525 | C | 0.14 | 0.17 | T | 0.77 | 0.68 | 0.88 | 9.93E-05 | 9.88E-05 |
| 6 | rs13212414 | 30140540 | T | 0.08 | 0.06 | A | 1.41 | 1.17 | 1.69 | 2.50E-04 | 2.36E-04 |
| 6 | rs2844787  | 30140913 | C | 0.22 | 0.22 | A | 0.97 | 0.87 | 1.09 | 6.39E-01 | 7.07E-01 |
| 6 | rs9380156  | 30141042 | G | 0.14 | 0.16 | A | 0.84 | 0.73 | 0.95 | 7.92E-03 | 5.18E-03 |
| 6 | rs957765   | 30142690 | A | 0.29 | 0.23 | G | 1.34 | 1.21 | 1.48 | 2.51E-08 | 2.36E-08 |
| 6 | rs9261538  | 30143491 | C | 0.09 | 0.10 | T | 0.97 | 0.83 | 1.14 | 7.18E-01 | 7.70E-01 |
| 6 | rs2844786  | 30144420 | T | 0.37 | 0.30 | G | 1.34 | 1.22 | 1.48 | 3.04E-09 | 2.82E-09 |
| 6 | rs9261539  | 30145083 | A | 0.50 | 0.45 | G | 1.22 | 1.11 | 1.34 | 2.38E-05 | 1.43E-05 |
| 6 | rs9261543  | 30146650 | G | 0.50 | 0.45 | A | 1.22 | 1.11 | 1.34 | 2.61E-05 | 1.55E-05 |
| 6 | rs28743267 | 30147689 | G | 0.13 | 0.10 | T | 1.27 | 1.11 | 1.47 | 7.71E-04 | 7.93E-04 |
| 6 | rs2844782  | 30150043 | A | 0.37 | 0.30 | C | 1.35 | 1.23 | 1.49 | 1.04E-09 | 1.00E-09 |
| 6 | rs2428504  | 30151370 | G | 0.07 | 0.07 | A | 1.08 | 0.91 | 1.29 | 3.88E-01 | 3.45E-01 |
| 6 | rs9366754  | 30152033 | C | 0.14 | 0.16 | G | 0.84 | 0.73 | 0.96 | 8.68E-03 | 5.55E-03 |
| 6 | rs9261547  | 30154928 | G | 0.12 | 0.12 | A | 1.00 | 0.87 | 1.15 | 9.98E-01 | 1.00E+00 |
| 6 | rs6457164  | 30155108 | T | 0.50 | 0.45 | C | 1.22 | 1.12 | 1.34 | 1.84E-05 | 1.18E-05 |
| 6 | rs6457167  | 30155313 | T | 0.50 | 0.45 | C | 1.22 | 1.11 | 1.34 | 1.95E-05 | 1.25E-05 |
| 6 | rs2074471  | 30156802 | T | 0.01 | 0.02 | C | 0.69 | 0.48 | 1.01 | 5.31E-02 | 4.99E-02 |
| 6 | rs765977   | 30157654 | A | 0.50 | 0.45 | G | 1.23 | 1.12 | 1.34 | 1.59E-05 | 1.03E-05 |
| 6 | rs718254   | 30159039 | C | 0.50 | 0.45 | G | 1.22 | 1.11 | 1.33 | 3.17E-05 | 1.98E-05 |
| 6 | rs2284165  | 30160055 | G | 0.22 | 0.20 | C | 1.08 | 0.97 | 1.21 | 1.75E-01 | 1.81E-01 |
| 6 | rs4711211  | 30162809 | G | 0.29 | 0.23 | A | 1.34 | 1.21 | 1.48 | 2.65E-08 | 2.52E-08 |

|   |            |          |   |      |      |   |      |      |      |          |          |
|---|------------|----------|---|------|------|---|------|------|------|----------|----------|
| 6 | rs2517614  | 30163955 | T | 0.19 | 0.20 | C | 0.96 | 0.86 | 1.08 | 5.00E-01 | 5.77E-01 |
| 6 | rs3778622  | 30165316 | A | 0.29 | 0.23 | T | 1.33 | 1.20 | 1.48 | 3.80E-08 | 3.71E-08 |
| 6 | rs28360011 | 30166945 | G | 0.04 | 0.04 | A | 0.97 | 0.76 | 1.24 | 8.21E-01 | 8.68E-01 |
| 6 | rs28360013 | 30168202 | C | 0.07 | 0.07 | T | 1.08 | 0.90 | 1.29 | 3.90E-01 | 3.48E-01 |
| 6 | rs2517612  | 30169092 | C | 0.12 | 0.13 | T | 0.90 | 0.78 | 1.04 | 1.46E-01 | 1.68E-01 |
| 6 | rs2517611  | 30169327 | C | 0.19 | 0.20 | T | 0.96 | 0.86 | 1.08 | 5.21E-01 | 6.01E-01 |
| 6 | rs28730510 | 30170057 | G | 0.14 | 0.16 | C | 0.84 | 0.74 | 0.96 | 1.14E-02 | 7.27E-03 |
| 6 | rs2844776  | 30171827 | G | 0.20 | 0.21 | A | 0.95 | 0.85 | 1.07 | 4.27E-01 | 5.05E-01 |
| 6 | rs971570   | 30172513 | G | 0.20 | 0.20 | T | 0.96 | 0.86 | 1.08 | 4.93E-01 | 5.69E-01 |
| 6 | rs885913   | 30174428 | A | 0.12 | 0.13 | T | 0.90 | 0.79 | 1.04 | 1.56E-01 | 1.79E-01 |
| 6 | rs9261564  | 30174590 | T | 0.06 | 0.07 | C | 0.82 | 0.68 | 0.99 | 3.78E-02 | 4.24E-02 |
| 6 | rs10947058 | 30176122 | T | 0.07 | 0.05 | C | 1.41 | 1.17 | 1.71 | 3.11E-04 | 2.81E-04 |
| 6 | rs3132671  | 30178287 | A | 0.50 | 0.45 | G | 1.22 | 1.12 | 1.34 | 1.89E-05 | 1.19E-05 |
| 6 | rs3130383  | 30179026 | C | 0.50 | 0.45 | A | 1.22 | 1.12 | 1.34 | 1.84E-05 | 1.15E-05 |
| 6 | rs11967808 | 30179188 | C | 0.02 | 0.02 | G | 1.41 | 1.02 | 1.97 | 3.90E-02 | 3.53E-02 |
| 6 | rs2844775  | 30179422 | T | 0.30 | 0.25 | C | 1.32 | 1.19 | 1.46 | 7.44E-08 | 6.80E-08 |
| 6 | rs2188100  | 30181883 | T | 0.12 | 0.13 | C | 0.90 | 0.78 | 1.04 | 1.46E-01 | 1.68E-01 |
| 6 | rs1345229  | 30182395 | T | 0.08 | 0.10 | C | 0.75 | 0.63 | 0.88 | 4.50E-04 | 4.43E-04 |
| 6 | rs9261567  | 30185244 | C | 0.12 | 0.15 | T | 0.79 | 0.69 | 0.91 | 7.76E-04 | 8.22E-04 |
| 6 | rs2106070  | 30186863 | C | 0.49 | 0.45 | T | 1.21 | 1.10 | 1.32 | 7.19E-05 | 4.90E-05 |
| 6 | rs3094132  | 30187434 | G | 0.50 | 0.45 | C | 1.22 | 1.11 | 1.34 | 2.32E-05 | 1.44E-05 |
| 6 | rs3130391  | 30190640 | T | 0.50 | 0.45 | C | 1.22 | 1.11 | 1.34 | 2.33E-05 | 1.44E-05 |
| 6 | rs9261578  | 30192467 | G | 0.15 | 0.19 | C | 0.75 | 0.66 | 0.85 | 4.86E-06 | 5.03E-06 |
| 6 | rs2040486  | 30194103 | G | 0.50 | 0.45 | T | 1.22 | 1.11 | 1.34 | 2.32E-05 | 1.44E-05 |
| 6 | rs3129690  | 30196855 | C | 0.50 | 0.45 | T | 1.22 | 1.11 | 1.34 | 2.64E-05 | 1.65E-05 |
| 6 | rs3094138  | 30199016 | G | 0.14 | 0.14 | A | 0.96 | 0.84 | 1.10 | 5.84E-01 | 5.85E-01 |
| 6 | rs1573295  | 30199067 | T | 0.50 | 0.45 | C | 1.22 | 1.11 | 1.34 | 2.32E-05 | 1.44E-05 |
| 6 | rs17188268 | 30199358 | A | 0.02 | 0.02 | G | 1.38 | 0.99 | 1.92 | 5.82E-02 | 5.35E-02 |
| 6 | rs3132674  | 30202429 | A | 0.50 | 0.45 | G | 1.22 | 1.11 | 1.34 | 2.24E-05 | 1.37E-05 |
| 6 | rs885916   | 30202571 | A | 0.12 | 0.13 | G | 0.90 | 0.79 | 1.04 | 1.56E-01 | 1.79E-01 |
| 6 | rs885914   | 30202767 | G | 0.38 | 0.32 | T | 1.31 | 1.19 | 1.44 | 5.55E-08 | 4.43E-08 |
| 6 | rs2844780  | 30204526 | A | 0.38 | 0.32 | C | 1.31 | 1.19 | 1.44 | 5.55E-08 | 4.38E-08 |
| 6 | rs2844779  | 30205407 | A | 0.37 | 0.31 | C | 1.29 | 1.17 | 1.42 | 2.27E-07 | 1.75E-07 |
| 6 | rs10456378 | 30206186 | A | 0.07 | 0.05 | G | 1.41 | 1.17 | 1.71 | 3.10E-04 | 2.89E-04 |



|   |            |          |   |      |      |   |      |      |      |          |          |
|---|------------|----------|---|------|------|---|------|------|------|----------|----------|
| 6 | rs2844773  | 30207495 | T | 0.13 | 0.14 | G | 0.92 | 0.81 | 1.06 | 2.44E-01 | 2.85E-01 |
| 6 | rs2285801  | 30209493 | C | 0.51 | 0.46 | T | 1.23 | 1.12 | 1.35 | 9.37E-06 | 5.31E-06 |
| 6 | rs1362089  | 30209802 | C | 0.51 | 0.46 | A | 1.23 | 1.12 | 1.35 | 9.37E-06 | 5.31E-06 |
| 6 | rs1362088  | 30209836 | G | 0.01 | 0.02 | A | 0.71 | 0.47 | 1.06 | 8.73E-02 | 8.63E-02 |
| 6 | rs9261588  | 30210807 | T | 0.12 | 0.12 | G | 0.99 | 0.86 | 1.14 | 9.27E-01 | 9.24E-01 |
| 6 | rs12176323 | 30212504 | T | 0.01 | 0.02 | C | 0.70 | 0.47 | 1.05 | 8.69E-02 | 8.60E-02 |
| 6 | rs3132662  | 30215592 | T | 0.49 | 0.44 | C | 1.20 | 1.10 | 1.32 | 8.28E-05 | 5.31E-05 |
| 6 | rs2516723  | 30221442 | G | 0.49 | 0.44 | A | 1.20 | 1.09 | 1.31 | 1.04E-04 | 6.79E-05 |
| 6 | rs1579219  | 30224305 | A | 0.13 | 0.16 | G | 0.84 | 0.73 | 0.95 | 8.17E-03 | 3.86E-03 |
| 6 | rs3094078  | 30224970 | T | 0.08 | 0.10 | A | 0.85 | 0.72 | 1.00 | 4.52E-02 | 5.26E-02 |
| 6 | rs962899   | 30226811 | C | 0.19 | 0.22 | G | 0.80 | 0.71 | 0.90 | 1.87E-04 | 8.21E-05 |
| 6 | rs2844766  | 30230661 | G | 0.33 | 0.37 | A | 0.83 | 0.76 | 0.92 | 2.01E-04 | 1.58E-04 |
| 6 | rs3094073  | 30231224 | T | 0.13 | 0.15 | C | 0.89 | 0.78 | 1.02 | 1.01E-01 | 1.27E-01 |
| 6 | rs3129831  | 30234627 | T | 0.13 | 0.15 | A | 0.89 | 0.78 | 1.02 | 9.91E-02 | 1.25E-01 |
| 6 | rs9378145  | 30236331 | C | 0.13 | 0.15 | G | 0.84 | 0.73 | 0.96 | 9.44E-03 | 4.59E-03 |
| 6 | rs2844761  | 30237454 | C | 0.19 | 0.22 | T | 0.84 | 0.75 | 0.94 | 2.99E-03 | 1.64E-03 |
| 6 | rs2097773  | 30240926 | T | 0.19 | 0.22 | G | 0.84 | 0.75 | 0.94 | 2.99E-03 | 1.64E-03 |
| 6 | rs9393999  | 30241114 | G | 0.13 | 0.15 | A | 0.84 | 0.73 | 0.96 | 8.40E-03 | 4.07E-03 |
| 6 | rs28780093 | 30242171 | G | 0.10 | 0.12 | A | 0.80 | 0.69 | 0.93 | 3.33E-03 | 3.41E-03 |
| 6 | rs968909   | 30244579 | A | 0.24 | 0.27 | G | 0.86 | 0.77 | 0.95 | 4.70E-03 | 2.99E-03 |
| 6 | rs2844754  | 30246212 | T | 0.05 | 0.05 | G | 0.95 | 0.77 | 1.18 | 6.58E-01 | 7.09E-01 |
| 6 | rs2844753  | 30248424 | G | 0.09 | 0.07 | A | 1.25 | 1.05 | 1.48 | 1.00E-02 | 7.78E-03 |
| 6 | rs2394779  | 30252606 | C | 0.13 | 0.15 | A | 0.84 | 0.73 | 0.96 | 8.46E-03 | 4.07E-03 |
| 6 | rs1132547  | 30253339 | C | 0.06 | 0.07 | A | 0.91 | 0.75 | 1.10 | 3.20E-01 | 3.47E-01 |
| 6 | rs10484551 | 30256838 | A | 0.05 | 0.05 | G | 0.99 | 0.80 | 1.22 | 8.98E-01 | 9.43E-01 |
| 6 | rs17194767 | 30256885 | T | 0.05 | 0.05 | C | 0.99 | 0.80 | 1.23 | 9.12E-01 | 9.60E-01 |
| 6 | rs1264622  | 30256936 | A | 0.17 | 0.17 | G | 1.01 | 0.89 | 1.14 | 9.01E-01 | 7.97E-01 |
| 6 | rs2285799  | 30257693 | G | 0.05 | 0.05 | A | 0.98 | 0.79 | 1.22 | 8.86E-01 | 9.37E-01 |
| 6 | rs4713309  | 30258708 | T | 0.05 | 0.05 | C | 0.99 | 0.80 | 1.23 | 9.19E-01 | 9.64E-01 |
| 6 | rs1045251  | 30259657 | A | 0.19 | 0.22 | C | 0.84 | 0.75 | 0.94 | 2.99E-03 | 1.64E-03 |
| 6 | rs11752362 | 30260982 | T | 0.11 | 0.14 | C | 0.76 | 0.65 | 0.87 | 1.22E-04 | 1.24E-04 |
| 6 | rs1048664  | 30262512 | C | 0.05 | 0.05 | T | 0.96 | 0.78 | 1.18 | 6.69E-01 | 7.22E-01 |
| 6 | rs1264616  | 30264307 | A | 0.19 | 0.22 | G | 0.84 | 0.75 | 0.94 | 2.83E-03 | 1.56E-03 |
| 6 | rs261950   | 30269561 | A | 0.25 | 0.28 | T | 0.87 | 0.79 | 0.97 | 1.11E-02 | 6.89E-03 |

|   |            |          |   |      |      |   |      |      |      |          |          |
|---|------------|----------|---|------|------|---|------|------|------|----------|----------|
| 6 | rs261949   | 30270080 | T | 0.20 | 0.23 | C | 0.84 | 0.75 | 0.94 | 2.80E-03 | 1.52E-03 |
| 6 | rs261946   | 30271334 | C | 0.31 | 0.26 | T | 1.27 | 1.15 | 1.40 | 3.77E-06 | 2.83E-06 |
| 6 | rs4713310  | 30271792 | A | 0.05 | 0.05 | G | 1.05 | 0.85 | 1.28 | 6.61E-01 | 6.40E-01 |
| 6 | rs9380167  | 30274461 | G | 0.25 | 0.28 | A | 0.88 | 0.79 | 0.97 | 1.22E-02 | 7.84E-03 |
| 6 | rs928822   | 30275246 | C | 0.46 | 0.41 | A | 1.25 | 1.14 | 1.37 | 1.87E-06 | 1.56E-06 |
| 6 | rs1264608  | 30278112 | A | 0.09 | 0.07 | G | 1.21 | 1.02 | 1.43 | 2.72E-02 | 2.19E-02 |
| 6 | rs3130380  | 30279130 | A | 0.08 | 0.10 | G | 0.84 | 0.72 | 0.99 | 4.02E-02 | 4.82E-02 |
| 6 | rs3094065  | 30282332 | A | 0.12 | 0.12 | G | 1.00 | 0.87 | 1.14 | 9.45E-01 | 9.52E-01 |
| 6 | rs6912771  | 30284375 | A | 0.25 | 0.28 | C | 0.87 | 0.79 | 0.97 | 1.05E-02 | 6.73E-03 |
| 6 | rs9357097  | 30285121 | T | 0.24 | 0.26 | C | 0.89 | 0.80 | 0.98 | 2.43E-02 | 1.71E-02 |
| 6 | rs6924282  | 30285883 | A | 0.25 | 0.28 | G | 0.88 | 0.79 | 0.98 | 1.67E-02 | 1.11E-02 |
| 6 | rs9366755  | 30286729 | T | 0.13 | 0.15 | C | 0.83 | 0.73 | 0.95 | 6.94E-03 | 3.34E-03 |
| 6 | rs6900042  | 30289271 | T | 0.25 | 0.28 | C | 0.88 | 0.80 | 0.98 | 1.88E-02 | 1.28E-02 |
| 6 | rs12174823 | 30292083 | C | 0.12 | 0.14 | T | 0.86 | 0.75 | 0.98 | 2.79E-02 | 1.54E-02 |
| 6 | rs28360024 | 30292147 | T | 0.06 | 0.07 | C | 0.90 | 0.75 | 1.09 | 2.93E-01 | 3.18E-01 |
| 6 | rs17194824 | 30293186 | A | 0.05 | 0.05 | G | 0.96 | 0.78 | 1.18 | 6.69E-01 | 7.22E-01 |
| 6 | rs1264583  | 30293483 | A | 0.09 | 0.07 | G | 1.21 | 1.02 | 1.43 | 2.72E-02 | 2.19E-02 |
| 6 | rs3094064  | 30296253 | T | 0.09 | 0.10 | C | 0.86 | 0.74 | 1.01 | 7.04E-02 | 8.57E-02 |
| 6 | rs1264581  | 30297505 | A | 0.09 | 0.07 | G | 1.22 | 1.03 | 1.44 | 2.16E-02 | 1.69E-02 |
| 6 | rs3094067  | 30299245 | C | 0.08 | 0.10 | A | 0.85 | 0.72 | 1.00 | 5.19E-02 | 6.07E-02 |
| 6 | rs12663184 | 30301600 | T | 0.10 | 0.12 | C | 0.80 | 0.68 | 0.93 | 3.07E-03 | 3.09E-03 |
| 6 | rs3778624  | 30302600 | G | 0.20 | 0.23 | T | 0.87 | 0.78 | 0.97 | 1.31E-02 | 7.22E-03 |
| 6 | rs7767653  | 30304816 | A | 0.06 | 0.07 | G | 0.91 | 0.75 | 1.09 | 3.00E-01 | 3.25E-01 |
| 6 | rs3129840  | 30307342 | C | 0.13 | 0.14 | G | 0.90 | 0.79 | 1.03 | 1.10E-01 | 1.39E-01 |
| 6 | rs9380173  | 30309105 | A | 0.12 | 0.14 | G | 0.86 | 0.75 | 0.99 | 2.97E-02 | 1.63E-02 |
| 6 | rs2240058  | 30310500 | G | 0.12 | 0.14 | A | 0.86 | 0.75 | 0.99 | 2.97E-02 | 1.63E-02 |
| 6 | rs6931763  | 30311932 | C | 0.11 | 0.14 | A | 0.75 | 0.65 | 0.87 | 8.06E-05 | 7.70E-05 |
| 6 | rs974962   | 30314607 | C | 0.12 | 0.14 | T | 0.86 | 0.75 | 0.98 | 2.58E-02 | 1.40E-02 |
| 6 | rs974961   | 30315011 | T | 0.31 | 0.26 | A | 1.27 | 1.15 | 1.41 | 2.25E-06 | 1.67E-06 |
| 6 | rs9394003  | 30315210 | G | 0.20 | 0.23 | A | 0.86 | 0.77 | 0.96 | 8.80E-03 | 4.77E-03 |
| 6 | rs9380174  | 30316739 | T | 0.20 | 0.22 | C | 0.84 | 0.75 | 0.94 | 3.17E-03 | 1.70E-03 |
| 6 | rs34266569 | 30316980 | C | 0.05 | 0.04 | A | 1.12 | 0.90 | 1.39 | 3.25E-01 | 3.60E-01 |
| 6 | rs3130364  | 30319154 | T | 0.08 | 0.10 | A | 0.85 | 0.72 | 1.00 | 4.38E-02 | 5.23E-02 |
| 6 | rs3132649  | 30321057 | T | 0.10 | 0.11 | C | 0.90 | 0.78 | 1.05 | 1.73E-01 | 2.10E-01 |

|   |            |          |   |      |      |   |      |      |      |          |          |
|---|------------|----------|---|------|------|---|------|------|------|----------|----------|
| 6 | rs3094061  | 30321189 | G | 0.10 | 0.11 | T | 0.90 | 0.78 | 1.05 | 1.74E-01 | 2.12E-01 |
| 6 | rs984802   | 30321361 | A | 0.24 | 0.23 | C | 1.05 | 0.94 | 1.17 | 4.08E-01 | 4.90E-01 |
| 6 | rs3130377  | 30323393 | T | 0.08 | 0.10 | C | 0.84 | 0.71 | 0.98 | 3.08E-02 | 3.79E-02 |
| 6 | rs3094626  | 30323623 | G | 0.37 | 0.38 | A | 0.96 | 0.88 | 1.06 | 4.37E-01 | 3.99E-01 |
| 6 | rs3130379  | 30325531 | T | 0.21 | 0.23 | C | 0.93 | 0.83 | 1.04 | 1.92E-01 | 2.14E-01 |
| 6 | rs3130350  | 30327839 | T | 0.08 | 0.10 | G | 0.84 | 0.71 | 0.99 | 3.34E-02 | 4.18E-02 |
| 6 | rs3130351  | 30328192 | T | 0.08 | 0.10 | C | 0.84 | 0.71 | 0.99 | 3.41E-02 | 4.21E-02 |
| 6 | rs3094621  | 30328753 | G | 0.09 | 0.10 | A | 0.83 | 0.71 | 0.97 | 2.22E-02 | 2.85E-02 |
| 6 | rs3132647  | 30330737 | C | 0.08 | 0.10 | T | 0.84 | 0.71 | 0.98 | 2.95E-02 | 3.65E-02 |
| 6 | rs1012411  | 30332555 | C | 0.29 | 0.30 | A | 0.92 | 0.83 | 1.02 | 1.19E-01 | 1.45E-01 |
| 6 | rs3094054  | 30333505 | A | 0.09 | 0.10 | C | 0.84 | 0.72 | 0.99 | 3.41E-02 | 4.23E-02 |
| 6 | rs2040450  | 30334339 | A | 0.14 | 0.13 | G | 1.05 | 0.92 | 1.20 | 4.51E-01 | 4.51E-01 |
| 6 | rs2057726  | 30335350 | G | 0.13 | 0.14 | A | 0.94 | 0.82 | 1.07 | 3.37E-01 | 4.08E-01 |
| 6 | rs2022079  | 30337738 | A | 0.28 | 0.28 | G | 1.04 | 0.93 | 1.15 | 5.11E-01 | 6.00E-01 |
| 6 | rs17839997 | 30339293 | C | 0.05 | 0.06 | A | 0.86 | 0.70 | 1.06 | 1.45E-01 | 1.78E-01 |
| 6 | rs3130361  | 30339564 | A | 0.21 | 0.22 | G | 0.93 | 0.83 | 1.04 | 1.98E-01 | 2.20E-01 |
| 6 | rs2844746  | 30339602 | A | 0.36 | 0.36 | G | 0.98 | 0.89 | 1.08 | 6.28E-01 | 6.77E-01 |
| 6 | rs2844745  | 30343703 | G | 0.43 | 0.42 | A | 1.05 | 0.96 | 1.15 | 3.11E-01 | 3.01E-01 |
| 6 | rs3132631  | 30344645 | A | 0.09 | 0.11 | G | 0.83 | 0.71 | 0.97 | 1.91E-02 | 2.19E-02 |
| 6 | rs3094062  | 30344690 | T | 0.43 | 0.45 | C | 0.93 | 0.85 | 1.02 | 1.04E-01 | 9.64E-02 |
| 6 | rs3132630  | 30345118 | A | 0.09 | 0.11 | G | 0.83 | 0.71 | 0.97 | 1.76E-02 | 2.06E-02 |
| 6 | rs1419653  | 30345139 | A | 0.43 | 0.45 | G | 0.93 | 0.85 | 1.02 | 1.03E-01 | 9.55E-02 |
| 6 | rs3129822  | 30346208 | T | 0.09 | 0.11 | G | 0.83 | 0.71 | 0.97 | 1.74E-02 | 2.03E-02 |
| 6 | rs9404964  | 30347833 | C | 0.28 | 0.28 | T | 1.03 | 0.93 | 1.14 | 5.60E-01 | 6.55E-01 |
| 6 | rs3132622  | 30348674 | A | 0.43 | 0.45 | G | 0.93 | 0.85 | 1.02 | 1.16E-01 | 1.09E-01 |
| 6 | rs3094623  | 30349201 | T | 0.43 | 0.45 | C | 0.93 | 0.85 | 1.02 | 1.09E-01 | 1.02E-01 |
| 6 | rs2524211  | 30350660 | T | 0.14 | 0.14 | C | 1.05 | 0.92 | 1.20 | 4.38E-01 | 4.32E-01 |
| 6 | rs28780099 | 30351417 | G | 0.06 | 0.07 | A | 0.85 | 0.70 | 1.04 | 1.06E-01 | 1.05E-01 |
| 6 | rs3130126  | 30353739 | A | 0.09 | 0.11 | C | 0.83 | 0.71 | 0.97 | 1.86E-02 | 2.20E-02 |
| 6 | rs3094028  | 30354642 | T | 0.43 | 0.45 | C | 0.93 | 0.85 | 1.02 | 1.03E-01 | 9.65E-02 |
| 6 | rs3130140  | 30357780 | C | 0.41 | 0.42 | T | 0.95 | 0.87 | 1.04 | 2.75E-01 | 2.71E-01 |
| 6 | rs3094051  | 30358151 | C | 0.43 | 0.45 | T | 0.93 | 0.85 | 1.02 | 1.02E-01 | 9.54E-02 |
| 6 | rs3130143  | 30358216 | C | 0.43 | 0.45 | G | 0.92 | 0.84 | 1.01 | 9.30E-02 | 8.74E-02 |
| 6 | rs3094050  | 30358591 | C | 0.09 | 0.11 | T | 0.83 | 0.71 | 0.97 | 2.02E-02 | 2.35E-02 |

|   |            |          |   |      |      |   |      |      |      |          |          |
|---|------------|----------|---|------|------|---|------|------|------|----------|----------|
| 6 | rs3094700  | 30360068 | A | 0.43 | 0.44 | G | 0.93 | 0.85 | 1.02 | 1.11E-01 | 1.03E-01 |
| 6 | rs3094697  | 30361232 | G | 0.43 | 0.45 | A | 0.93 | 0.84 | 1.02 | 9.88E-02 | 9.23E-02 |
| 6 | rs3094042  | 30361418 | T | 0.43 | 0.44 | C | 0.93 | 0.85 | 1.02 | 1.07E-01 | 1.00E-01 |
| 6 | rs2516685  | 30361608 | C | 0.43 | 0.42 | T | 1.05 | 0.96 | 1.15 | 3.12E-01 | 3.02E-01 |
| 6 | rs2516684  | 30362995 | T | 0.14 | 0.14 | C | 1.05 | 0.92 | 1.20 | 4.72E-01 | 4.64E-01 |
| 6 | rs3130113  | 30363945 | T | 0.43 | 0.45 | C | 0.93 | 0.85 | 1.02 | 1.09E-01 | 1.02E-01 |
| 6 | rs17475879 | 30364508 | T | 0.06 | 0.07 | C | 0.86 | 0.71 | 1.04 | 1.12E-01 | 1.09E-01 |
| 6 | rs1264569  | 30365320 | G | 0.23 | 0.22 | A | 1.04 | 0.94 | 1.16 | 4.48E-01 | 3.96E-01 |
| 6 | rs1264567  | 30366100 | G | 0.18 | 0.18 | A | 0.98 | 0.87 | 1.10 | 6.91E-01 | 6.86E-01 |
| 6 | rs12203316 | 30368012 | C | 0.21 | 0.18 | T | 1.16 | 1.03 | 1.30 | 1.38E-02 | 1.52E-02 |
| 6 | rs1034323  | 30368635 | A | 0.45 | 0.41 | G | 1.19 | 1.08 | 1.31 | 2.70E-04 | 4.62E-04 |
| 6 | rs9261743  | 30369040 | T | 0.25 | 0.23 | G | 1.11 | 1.00 | 1.24 | 5.72E-02 | 7.78E-02 |
| 6 | rs10947072 | 30372278 | T | 0.22 | 0.20 | C | 1.10 | 0.99 | 1.23 | 8.53E-02 | 9.56E-02 |
| 6 | rs7741364  | 30372570 | A | 0.41 | 0.37 | G | 1.19 | 1.08 | 1.31 | 2.96E-04 | 3.61E-04 |
| 6 | rs9261761  | 30372987 | A | 0.19 | 0.16 | G | 1.19 | 1.05 | 1.34 | 5.40E-03 | 5.30E-03 |
| 6 | rs1264551  | 30377173 | T | 0.22 | 0.23 | C | 0.93 | 0.83 | 1.04 | 1.93E-01 | 2.06E-01 |
| 6 | rs1264550  | 30377198 | T | 0.37 | 0.40 | C | 0.88 | 0.81 | 0.97 | 1.08E-02 | 1.16E-02 |
| 6 | rs1264547  | 30378447 | T | 0.22 | 0.23 | C | 0.93 | 0.84 | 1.04 | 2.00E-01 | 2.13E-01 |
| 6 | rs9261817  | 30378601 | C | 0.19 | 0.16 | A | 1.19 | 1.05 | 1.34 | 5.04E-03 | 4.94E-03 |
| 6 | rs9261821  | 30379074 | C | 0.19 | 0.16 | T | 1.19 | 1.06 | 1.34 | 4.51E-03 | 4.44E-03 |
| 6 | rs9261846  | 30382440 | C | 0.19 | 0.16 | G | 1.17 | 1.04 | 1.32 | 1.16E-02 | 1.21E-02 |
| 6 | rs9261847  | 30382647 | G | 0.19 | 0.16 | T | 1.21 | 1.08 | 1.37 | 1.67E-03 | 1.72E-03 |
| 6 | rs9261858  | 30384317 | A | 0.19 | 0.16 | G | 1.20 | 1.06 | 1.35 | 3.33E-03 | 3.29E-03 |
| 6 | rs2074502  | 30384322 | T | 0.21 | 0.20 | C | 1.10 | 0.98 | 1.23 | 1.15E-01 | 1.36E-01 |
| 6 | rs9261860  | 30384503 | A | 0.19 | 0.16 | G | 1.25 | 1.11 | 1.41 | 3.70E-04 | 3.93E-04 |
| 6 | rs9261862  | 30384738 | G | 0.19 | 0.16 | C | 1.19 | 1.06 | 1.35 | 3.57E-03 | 3.51E-03 |
| 6 | rs9261871  | 30385894 | G | 0.19 | 0.16 | A | 1.21 | 1.07 | 1.36 | 2.02E-03 | 1.97E-03 |
| 6 | rs1264542  | 30386996 | C | 0.41 | 0.41 | T | 1.01 | 0.92 | 1.11 | 8.74E-01 | 8.66E-01 |
| 6 | rs9261919  | 30391723 | A | 0.19 | 0.16 | G | 1.19 | 1.06 | 1.35 | 3.65E-03 | 3.62E-03 |
| 6 | rs9261922  | 30392146 | T | 0.21 | 0.19 | C | 1.13 | 1.01 | 1.27 | 3.12E-02 | 3.32E-02 |
| 6 | rs9261923  | 30392160 | A | 0.19 | 0.16 | G | 1.19 | 1.06 | 1.35 | 3.57E-03 | 3.51E-03 |
| 6 | rs9261926  | 30392406 | A | 0.19 | 0.16 | C | 1.19 | 1.06 | 1.35 | 3.65E-03 | 3.59E-03 |
| 6 | rs9261947  | 30394628 | T | 0.19 | 0.16 | C | 1.21 | 1.07 | 1.37 | 1.98E-03 | 1.91E-03 |
| 6 | rs9501447  | 30397840 | G | 0.19 | 0.16 | A | 1.19 | 1.06 | 1.35 | 3.65E-03 | 3.57E-03 |

|   |            |          |   |      |      |   |      |      |      |          |          |
|---|------------|----------|---|------|------|---|------|------|------|----------|----------|
| 6 | rs1079541  | 30406756 | T | 0.19 | 0.16 | G | 1.20 | 1.06 | 1.35 | 3.30E-03 | 3.28E-03 |
| 6 | rs9501467  | 30408970 | T | 0.20 | 0.17 | C | 1.17 | 1.04 | 1.31 | 8.94E-03 | 9.18E-03 |
| 6 | rs1264518  | 30410206 | A | 0.15 | 0.16 | G | 0.96 | 0.85 | 1.09 | 5.56E-01 | 5.77E-01 |
| 6 | rs9295871  | 30411089 | C | 0.19 | 0.16 | T | 1.19 | 1.06 | 1.34 | 4.01E-03 | 3.94E-03 |
| 6 | rs1264514  | 30412045 | C | 0.42 | 0.41 | A | 1.03 | 0.94 | 1.13 | 4.96E-01 | 4.85E-01 |
| 6 | rs28512317 | 30413182 | C | 0.21 | 0.19 | A | 1.13 | 1.01 | 1.27 | 3.11E-02 | 3.28E-02 |
| 6 | rs9295873  | 30414235 | G | 0.19 | 0.16 | A | 1.19 | 1.06 | 1.34 | 4.10E-03 | 4.04E-03 |
| 6 | rs2524201  | 30415904 | G | 0.37 | 0.40 | A | 0.89 | 0.81 | 0.98 | 1.49E-02 | 1.42E-02 |
| 6 | rs4959047  | 30416553 | A | 0.21 | 0.19 | G | 1.14 | 1.02 | 1.28 | 2.46E-02 | 2.59E-02 |
| 6 | rs2844730  | 30417614 | T | 0.37 | 0.40 | C | 0.88 | 0.80 | 0.97 | 9.76E-03 | 9.82E-03 |
| 6 | rs4947284  | 30418662 | A | 0.02 | 0.03 | C | 0.83 | 0.61 | 1.13 | 2.34E-01 | 2.13E-01 |
| 6 | rs9295886  | 30421397 | T | 0.19 | 0.16 | C | 1.21 | 1.07 | 1.36 | 2.48E-03 | 2.63E-03 |
| 6 | rs2844729  | 30422632 | T | 0.42 | 0.41 | C | 1.04 | 0.95 | 1.14 | 4.47E-01 | 4.35E-01 |
| 6 | rs35407515 | 30423223 | G | 0.19 | 0.16 | A | 1.19 | 1.06 | 1.35 | 3.64E-03 | 3.58E-03 |
| 6 | rs34101875 | 30423358 | A | 0.19 | 0.17 | G | 1.19 | 1.06 | 1.35 | 3.73E-03 | 3.66E-03 |
| 6 | rs33986393 | 30424074 | G | 0.19 | 0.16 | A | 1.20 | 1.06 | 1.35 | 3.17E-03 | 3.14E-03 |
| 6 | rs28780104 | 30424655 | G | 0.06 | 0.07 | C | 0.86 | 0.71 | 1.04 | 1.17E-01 | 1.10E-01 |
| 6 | rs9501336  | 30427510 | A | 0.19 | 0.17 | G | 1.19 | 1.06 | 1.34 | 3.82E-03 | 3.74E-03 |
| 6 | rs2516676  | 30430482 | C | 0.16 | 0.17 | G | 0.98 | 0.87 | 1.11 | 7.97E-01 | 8.50E-01 |
| 6 | rs35792611 | 30430875 | G | 0.19 | 0.16 | C | 1.22 | 1.08 | 1.37 | 1.47E-03 | 1.34E-03 |
| 6 | rs10456384 | 30433090 | G | 0.05 | 0.04 | C | 1.23 | 0.99 | 1.51 | 5.55E-02 | 6.48E-02 |
| 6 | rs2524172  | 30433611 | T | 0.15 | 0.16 | C | 0.96 | 0.84 | 1.09 | 5.08E-01 | 5.52E-01 |
| 6 | rs7764934  | 30434566 | G | 0.45 | 0.41 | A | 1.19 | 1.08 | 1.31 | 2.59E-04 | 4.53E-04 |
| 6 | rs7747873  | 30434900 | C | 0.45 | 0.41 | T | 1.19 | 1.08 | 1.30 | 3.46E-04 | 5.89E-04 |
| 6 | rs6930977  | 30435288 | G | 0.18 | 0.16 | A | 1.14 | 1.01 | 1.28 | 3.67E-02 | 4.16E-02 |
| 6 | rs12174870 | 30436681 | A | 0.44 | 0.40 | G | 1.19 | 1.08 | 1.30 | 3.64E-04 | 6.03E-04 |
| 6 | rs12174433 | 30445476 | A | 0.06 | 0.06 | G | 0.91 | 0.75 | 1.11 | 3.47E-01 | 2.37E-01 |
| 6 | rs9295898  | 30449046 | T | 0.44 | 0.40 | C | 1.19 | 1.08 | 1.30 | 3.75E-04 | 6.27E-04 |
| 6 | rs2021720  | 30449244 | C | 0.44 | 0.40 | G | 1.19 | 1.08 | 1.31 | 3.06E-04 | 5.09E-04 |
| 6 | rs2021719  | 30449482 | T | 0.44 | 0.40 | C | 1.19 | 1.08 | 1.31 | 2.69E-04 | 4.51E-04 |
| 6 | rs28780106 | 30451515 | A | 0.06 | 0.07 | G | 0.86 | 0.71 | 1.04 | 1.16E-01 | 1.12E-01 |
| 6 | rs3094694  | 30451904 | G | 0.15 | 0.17 | A | 0.86 | 0.75 | 0.97 | 1.50E-02 | 2.16E-02 |
| 6 | rs1264459  | 30455920 | C | 0.17 | 0.17 | T | 0.95 | 0.84 | 1.07 | 4.10E-01 | 4.41E-01 |
| 6 | rs1264456  | 30462084 | T | 0.33 | 0.33 | C | 1.03 | 0.93 | 1.13 | 5.59E-01 | 5.65E-01 |

|   |            |          |   |      |      |   |      |      |      |          |          |
|---|------------|----------|---|------|------|---|------|------|------|----------|----------|
| 6 | rs2508024  | 30465512 | A | 0.37 | 0.36 | G | 1.04 | 0.94 | 1.14 | 4.72E-01 | 4.69E-01 |
| 6 | rs34372168 | 30467745 | G | 0.02 | 0.02 | A | 0.99 | 0.69 | 1.44 | 9.72E-01 | 9.71E-01 |
| 6 | rs3131115  | 30468791 | T | 0.35 | 0.34 | C | 1.03 | 0.93 | 1.13 | 6.18E-01 | 6.53E-01 |
| 6 | rs2844724  | 30469190 | G | 0.35 | 0.35 | A | 1.03 | 0.93 | 1.13 | 6.18E-01 | 6.29E-01 |
| 6 | rs2429657  | 30471520 | C | 0.21 | 0.23 | T | 0.91 | 0.81 | 1.01 | 8.23E-02 | 8.61E-02 |
| 6 | rs2844720  | 30475717 | A | 0.35 | 0.34 | G | 1.03 | 0.93 | 1.13 | 5.65E-01 | 5.78E-01 |
| 6 | rs2844718  | 30477276 | A | 0.35 | 0.34 | G | 1.03 | 0.93 | 1.13 | 6.08E-01 | 6.19E-01 |
| 6 | rs975195   | 30477947 | C | 0.35 | 0.34 | T | 1.03 | 0.93 | 1.13 | 5.79E-01 | 5.93E-01 |
| 6 | rs2534812  | 30482993 | G | 0.37 | 0.36 | A | 1.05 | 0.95 | 1.15 | 3.18E-01 | 3.18E-01 |
| 6 | rs7746096  | 30483919 | A | 0.02 | 0.02 | C | 1.19 | 0.84 | 1.67 | 3.25E-01 | 2.87E-01 |
| 6 | rs10484552 | 30484036 | C | 0.06 | 0.06 | G | 0.88 | 0.73 | 1.08 | 2.16E-01 | 2.10E-01 |
| 6 | rs7767714  | 30488033 | G | 0.02 | 0.02 | A | 1.19 | 0.84 | 1.67 | 3.24E-01 | 2.86E-01 |
| 6 | rs7768140  | 30488203 | T | 0.02 | 0.02 | C | 1.18 | 0.84 | 1.65 | 3.51E-01 | 3.11E-01 |
| 6 | rs2534824  | 30496160 | T | 0.35 | 0.34 | C | 1.03 | 0.94 | 1.13 | 5.50E-01 | 5.63E-01 |
| 6 | rs2534823  | 30496816 | G | 0.35 | 0.34 | C | 1.03 | 0.94 | 1.13 | 5.61E-01 | 5.74E-01 |
| 6 | rs2516649  | 30496882 | C | 0.35 | 0.34 | A | 1.03 | 0.94 | 1.13 | 5.53E-01 | 5.67E-01 |
| 6 | rs2524226  | 30497490 | T | 0.33 | 0.33 | C | 1.03 | 0.94 | 1.14 | 5.24E-01 | 5.35E-01 |
| 6 | rs2534815  | 30499127 | G | 0.35 | 0.34 | C | 1.03 | 0.94 | 1.13 | 5.43E-01 | 5.53E-01 |
| 6 | rs2524224  | 30505948 | T | 0.36 | 0.35 | A | 1.04 | 0.95 | 1.15 | 4.08E-01 | 4.09E-01 |
| 6 | rs1058318  | 30512163 | A | 0.33 | 0.33 | G | 1.03 | 0.94 | 1.14 | 5.27E-01 | 5.35E-01 |
| 6 | rs12192673 | 30512505 | G | 0.05 | 0.04 | T | 1.17 | 0.94 | 1.45 | 1.56E-01 | 1.63E-01 |
| 6 | rs2844713  | 30519258 | T | 0.36 | 0.35 | C | 1.03 | 0.94 | 1.14 | 4.91E-01 | 4.95E-01 |
| 6 | rs3130240  | 30536071 | C | 0.34 | 0.34 | A | 1.02 | 0.92 | 1.12 | 7.19E-01 | 7.37E-01 |
| 6 | rs3130041  | 30536133 | C | 0.35 | 0.35 | T | 1.03 | 0.94 | 1.13 | 5.62E-01 | 5.71E-01 |
| 6 | rs3130242  | 30537339 | G | 0.34 | 0.33 | A | 1.03 | 0.94 | 1.14 | 4.99E-01 | 5.13E-01 |
| 6 | rs3132613  | 30537606 | G | 0.34 | 0.33 | C | 1.03 | 0.94 | 1.14 | 4.95E-01 | 5.10E-01 |
| 6 | rs3130243  | 30537853 | C | 0.35 | 0.35 | A | 1.03 | 0.94 | 1.14 | 5.23E-01 | 5.31E-01 |
| 6 | rs2269710  | 30539952 | G | 0.36 | 0.35 | A | 1.04 | 0.94 | 1.14 | 4.58E-01 | 4.89E-01 |
| 6 | rs1264451  | 30541237 | C | 0.33 | 0.32 | A | 1.05 | 0.95 | 1.16 | 3.09E-01 | 3.14E-01 |
| 6 | rs3132611  | 30541852 | C | 0.09 | 0.09 | T | 0.93 | 0.79 | 1.10 | 4.04E-01 | 4.59E-01 |
| 6 | rs3132610  | 30544401 | C | 0.10 | 0.11 | T | 0.87 | 0.75 | 1.02 | 8.31E-02 | 1.07E-01 |
| 6 | rs3130043  | 30545022 | G | 0.37 | 0.36 | T | 1.05 | 0.95 | 1.15 | 3.59E-01 | 3.69E-01 |
| 6 | rs1264440  | 30551286 | T | 0.35 | 0.34 | C | 1.04 | 0.94 | 1.14 | 4.58E-01 | 4.66E-01 |
| 6 | rs1264439  | 30552502 | T | 0.33 | 0.32 | G | 1.05 | 0.95 | 1.16 | 3.22E-01 | 3.29E-01 |

|   |            |          |   |      |      |   |      |      |      |          |          |
|---|------------|----------|---|------|------|---|------|------|------|----------|----------|
| 6 | rs3130244  | 30552937 | A | 0.37 | 0.36 | C | 1.05 | 0.95 | 1.15 | 3.48E-01 | 3.59E-01 |
| 6 | rs17195446 | 30553853 | G | 0.01 | 0.01 | A | 0.84 | 0.55 | 1.28 | 4.09E-01 | 3.92E-01 |
| 6 | rs1264437  | 30553871 | G | 0.33 | 0.32 | A | 1.05 | 0.95 | 1.15 | 3.64E-01 | 3.78E-01 |
| 6 | rs9671     | 30559034 | C | 0.02 | 0.02 | T | 0.95 | 0.68 | 1.35 | 7.88E-01 | 8.18E-01 |
| 6 | rs13195066 | 30560796 | G | 0.20 | 0.18 | A | 1.13 | 1.01 | 1.27 | 3.65E-02 | 3.54E-02 |
| 6 | rs7749109  | 30561724 | G | 0.02 | 0.02 | A | 0.95 | 0.67 | 1.35 | 7.81E-01 | 8.11E-01 |
| 6 | rs1264432  | 30562021 | C | 0.33 | 0.32 | T | 1.04 | 0.95 | 1.15 | 4.16E-01 | 4.31E-01 |
| 6 | rs7749978  | 30562041 | A | 0.02 | 0.02 | G | 0.95 | 0.67 | 1.35 | 7.84E-01 | 8.13E-01 |
| 6 | rs6934466  | 30563608 | T | 0.02 | 0.02 | C | 0.96 | 0.68 | 1.36 | 8.20E-01 | 8.48E-01 |
| 6 | rs1264429  | 30565101 | G | 0.01 | 0.01 | A | 1.14 | 0.77 | 1.69 | 5.05E-01 | 5.23E-01 |
| 6 | rs7759666  | 30569489 | T | 0.15 | 0.15 | C | 1.00 | 0.88 | 1.14 | 9.56E-01 | 8.96E-01 |
| 6 | rs17195474 | 30571197 | A | 0.02 | 0.02 | C | 0.95 | 0.68 | 1.35 | 7.88E-01 | 8.18E-01 |
| 6 | rs7742291  | 30573139 | C | 0.02 | 0.02 | A | 0.95 | 0.68 | 1.35 | 7.88E-01 | 8.18E-01 |
| 6 | rs9262122  | 30573842 | C | 0.15 | 0.15 | T | 0.99 | 0.87 | 1.13 | 9.25E-01 | 9.89E-01 |
| 6 | rs1264420  | 30575603 | T | 0.33 | 0.32 | C | 1.05 | 0.95 | 1.16 | 3.16E-01 | 2.72E-01 |
| 6 | rs2267637  | 30578335 | T | 0.11 | 0.11 | C | 0.97 | 0.84 | 1.12 | 6.55E-01 | 5.50E-01 |
| 6 | rs2252745  | 30579315 | C | 0.33 | 0.32 | T | 1.05 | 0.95 | 1.16 | 3.17E-01 | 3.23E-01 |
| 6 | rs2267638  | 30580626 | A | 0.02 | 0.02 | C | 0.96 | 0.68 | 1.36 | 8.31E-01 | 8.63E-01 |
| 6 | rs16867845 | 30585333 | G | 0.02 | 0.02 | T | 0.93 | 0.66 | 1.32 | 7.00E-01 | 7.24E-01 |
| 6 | rs2270172  | 30592414 | G | 0.02 | 0.02 | A | 0.87 | 0.64 | 1.18 | 3.73E-01 | 3.68E-01 |
| 6 | rs2517565  | 30594394 | A | 0.04 | 0.04 | T | 1.03 | 0.82 | 1.29 | 7.99E-01 | 8.03E-01 |
| 6 | rs6904236  | 30596135 | G | 0.02 | 0.02 | A | 0.92 | 0.65 | 1.31 | 6.55E-01 | 6.77E-01 |
| 6 | rs12665339 | 30601232 | G | 0.17 | 0.16 | A | 1.13 | 1.00 | 1.27 | 5.28E-02 | 6.12E-02 |
| 6 | rs17195551 | 30601395 | T | 0.02 | 0.02 | C | 1.36 | 0.98 | 1.88 | 6.66E-02 | 5.75E-02 |
| 6 | rs3094104  | 30609629 | C | 0.04 | 0.04 | T | 1.02 | 0.82 | 1.28 | 8.62E-01 | 8.62E-01 |
| 6 | rs3132608  | 30609661 | G | 0.04 | 0.04 | A | 0.97 | 0.76 | 1.24 | 8.23E-01 | 7.78E-01 |
| 6 | rs1140809  | 30611676 | A | 0.47 | 0.50 | C | 0.89 | 0.82 | 0.98 | 1.63E-02 | 1.61E-02 |
| 6 | rs9262135  | 30618906 | G | 0.09 | 0.11 | A | 0.85 | 0.73 | 0.99 | 3.55E-02 | 4.66E-02 |
| 6 | rs17281677 | 30622459 | A | 0.03 | 0.04 | G | 0.88 | 0.68 | 1.14 | 3.35E-01 | 3.74E-01 |
| 6 | rs34057232 | 30623069 | G | 0.02 | 0.02 | A | 1.30 | 0.95 | 1.78 | 1.01E-01 | 1.01E-01 |
| 6 | rs3094100  | 30625155 | G | 0.06 | 0.06 | C | 0.94 | 0.78 | 1.15 | 5.66E-01 | 5.17E-01 |
| 6 | rs9262138  | 30627867 | C | 0.08 | 0.07 | T | 1.23 | 1.03 | 1.46 | 2.29E-02 | 1.77E-02 |
| 6 | rs3130000  | 30628082 | A | 0.09 | 0.09 | G | 0.92 | 0.78 | 1.08 | 2.86E-01 | 3.28E-01 |
| 6 | rs1076828  | 30628252 | T | 0.32 | 0.34 | C | 0.89 | 0.81 | 0.98 | 1.81E-02 | 2.35E-02 |

|   |            |          |   |      |      |   |      |      |      |          |          |
|---|------------|----------|---|------|------|---|------|------|------|----------|----------|
| 6 | rs4713346  | 30631063 | A | 0.01 | 0.01 | G | 0.99 | 0.65 | 1.50 | 9.58E-01 | 8.57E-01 |
| 6 | rs3094097  | 30633875 | C | 0.06 | 0.06 | T | 0.94 | 0.78 | 1.14 | 5.45E-01 | 4.98E-01 |
| 6 | rs2285321  | 30637998 | C | 0.02 | 0.02 | T | 0.97 | 0.67 | 1.38 | 8.49E-01 | 8.07E-01 |
| 6 | rs9295901  | 30639157 | C | 0.02 | 0.02 | G | 0.98 | 0.70 | 1.37 | 9.11E-01 | 8.68E-01 |
| 6 | rs6937357  | 30640324 | C | 0.02 | 0.02 | T | 0.99 | 0.69 | 1.41 | 9.44E-01 | 9.05E-01 |
| 6 | rs28360604 | 30643767 | G | 0.19 | 0.17 | C | 1.13 | 1.00 | 1.27 | 5.25E-02 | 5.05E-02 |
| 6 | rs2394392  | 30650318 | G | 0.06 | 0.06 | T | 1.08 | 0.89 | 1.30 | 4.58E-01 | 5.23E-01 |
| 6 | rs9262143  | 30652781 | T | 0.09 | 0.11 | C | 0.86 | 0.74 | 1.01 | 5.87E-02 | 7.47E-02 |
| 6 | rs2269706  | 30652872 | T | 0.08 | 0.08 | C | 1.01 | 0.85 | 1.20 | 9.25E-01 | 9.77E-01 |
| 6 | rs17189280 | 30656382 | C | 0.02 | 0.02 | A | 1.23 | 0.88 | 1.72 | 2.20E-01 | 2.23E-01 |
| 6 | rs3094092  | 30657015 | A | 0.09 | 0.09 | G | 0.90 | 0.76 | 1.06 | 1.93E-01 | 2.27E-01 |
| 6 | rs1075496  | 30658239 | T | 0.40 | 0.42 | G | 0.91 | 0.83 | 0.99 | 3.80E-02 | 4.30E-02 |
| 6 | rs7565     | 30668159 | A | 0.02 | 0.01 | G | 1.43 | 0.99 | 2.09 | 5.74E-02 | 7.95E-02 |
| 6 | rs9405048  | 30670292 | T | 0.17 | 0.15 | C | 1.12 | 0.99 | 1.26 | 7.59E-02 | 9.16E-02 |
| 6 | rs2239886  | 30670700 | G | 0.03 | 0.03 | T | 1.18 | 0.91 | 1.53 | 2.16E-01 | 2.68E-01 |
| 6 | rs28994872 | 30671650 | C | 0.01 | 0.02 | T | 0.62 | 0.40 | 0.97 | 3.29E-02 | 4.47E-02 |
| 6 | rs28994868 | 30673681 | T | 0.02 | 0.01 | C | 1.43 | 0.99 | 2.09 | 5.74E-02 | 7.96E-02 |
| 6 | rs28986466 | 30676046 | C | 0.02 | 0.02 | G | 1.24 | 0.90 | 1.71 | 1.81E-01 | 2.42E-01 |
| 6 | rs3094093  | 30679628 | A | 0.07 | 0.07 | T | 0.90 | 0.75 | 1.08 | 2.71E-01 | 2.82E-01 |
| 6 | rs9262152  | 30680916 | T | 0.15 | 0.15 | C | 0.99 | 0.87 | 1.13 | 9.26E-01 | 9.92E-01 |
| 6 | rs6924270  | 30681980 | G | 0.03 | 0.03 | A | 1.18 | 0.91 | 1.53 | 2.16E-01 | 2.67E-01 |
| 6 | rs3132587  | 30685066 | T | 0.08 | 0.09 | C | 0.90 | 0.76 | 1.05 | 1.79E-01 | 2.11E-01 |
| 6 | rs3132585  | 30687614 | G | 0.10 | 0.11 | C | 0.90 | 0.77 | 1.05 | 1.76E-01 | 2.11E-01 |
| 6 | rs9295910  | 30687714 | A | 0.05 | 0.05 | T | 0.94 | 0.76 | 1.17 | 5.89E-01 | 5.12E-01 |
| 6 | rs3132583  | 30688575 | G | 0.10 | 0.11 | C | 0.88 | 0.75 | 1.02 | 9.65E-02 | 1.24E-01 |
| 6 | rs3132582  | 30689001 | T | 0.10 | 0.11 | A | 0.87 | 0.75 | 1.01 | 6.01E-02 | 7.60E-02 |
| 6 | rs25526    | 30690816 | T | 0.02 | 0.02 | C | 1.17 | 0.83 | 1.64 | 3.67E-01 | 3.85E-01 |
| 6 | rs11546742 | 30692768 | G | 0.03 | 0.04 | C | 0.93 | 0.72 | 1.19 | 5.56E-01 | 5.10E-01 |
| 6 | rs9500864  | 30693232 | A | 0.01 | 0.01 | G | 1.00 | 0.67 | 1.50 | 9.96E-01 | 9.75E-01 |
| 6 | rs3095329  | 30693816 | C | 0.18 | 0.20 | T | 0.91 | 0.81 | 1.02 | 9.83E-02 | 1.08E-01 |
| 6 | rs3094127  | 30697447 | C | 0.19 | 0.20 | T | 0.91 | 0.81 | 1.02 | 1.01E-01 | 1.13E-01 |
| 6 | rs12179975 | 30697561 | C | 0.01 | 0.01 | T | 0.99 | 0.66 | 1.47 | 9.42E-01 | 9.00E-01 |
| 6 | rs9500867  | 30697931 | C | 0.01 | 0.01 | T | 0.99 | 0.66 | 1.47 | 9.43E-01 | 9.01E-01 |
| 6 | rs3909184  | 30699384 | G | 0.03 | 0.04 | C | 0.93 | 0.73 | 1.20 | 5.82E-01 | 5.18E-01 |



|   |            |          |   |      |      |   |      |      |      |          |          |
|---|------------|----------|---|------|------|---|------|------|------|----------|----------|
| 6 | rs9262155  | 30700497 | G | 0.10 | 0.10 | A | 1.05 | 0.91 | 1.23 | 5.01E-01 | 5.63E-01 |
| 6 | rs9969042  | 30700558 | G | 0.03 | 0.04 | A | 0.94 | 0.73 | 1.20 | 6.09E-01 | 5.38E-01 |
| 6 | rs2844704  | 30706013 | T | 0.19 | 0.17 | G | 1.13 | 1.01 | 1.28 | 4.09E-02 | 3.90E-02 |
| 6 | rs12111310 | 30708428 | C | 0.03 | 0.04 | T | 0.93 | 0.72 | 1.19 | 5.55E-01 | 4.91E-01 |
| 6 | rs1059612  | 30708955 | A | 0.09 | 0.11 | G | 0.86 | 0.74 | 1.00 | 5.45E-02 | 7.10E-02 |
| 6 | rs10947088 | 30709830 | C | 0.03 | 0.04 | T | 0.93 | 0.72 | 1.19 | 5.51E-01 | 4.87E-01 |
| 6 | rs1049943  | 30711026 | C | 0.03 | 0.04 | G | 0.93 | 0.72 | 1.19 | 5.47E-01 | 4.84E-01 |
| 6 | rs8512     | 30711357 | T | 0.16 | 0.16 | C | 0.98 | 0.86 | 1.11 | 7.00E-01 | 7.35E-01 |
| 6 | rs2535319  | 30714479 | G | 0.38 | 0.38 | A | 1.02 | 0.93 | 1.12 | 6.80E-01 | 6.37E-01 |
| 6 | rs7752674  | 30715637 | G | 0.03 | 0.03 | A | 1.14 | 0.87 | 1.51 | 3.45E-01 | 3.10E-01 |
| 6 | rs7753860  | 30716076 | T | 0.03 | 0.03 | G | 1.13 | 0.85 | 1.49 | 3.94E-01 | 3.69E-01 |
| 6 | rs12210092 | 30716719 | T | 0.05 | 0.04 | C | 1.19 | 0.95 | 1.49 | 1.29E-01 | 1.40E-01 |
| 6 | rs7763502  | 30717637 | A | 0.18 | 0.19 | C | 0.92 | 0.81 | 1.03 | 1.54E-01 | 1.38E-01 |
| 6 | rs2535323  | 30718180 | C | 0.15 | 0.17 | T | 0.85 | 0.75 | 0.97 | 1.34E-02 | 9.55E-03 |
| 6 | rs12202428 | 30719909 | G | 0.03 | 0.03 | A | 1.11 | 0.85 | 1.45 | 4.37E-01 | 4.04E-01 |
| 6 | rs28780111 | 30720311 | T | 0.15 | 0.17 | C | 0.88 | 0.78 | 1.00 | 4.77E-02 | 3.53E-02 |
| 6 | rs3129973  | 30721143 | T | 0.10 | 0.11 | C | 0.92 | 0.79 | 1.06 | 2.49E-01 | 2.71E-01 |
| 6 | rs3095328  | 30723781 | T | 0.10 | 0.11 | C | 0.91 | 0.78 | 1.06 | 2.33E-01 | 2.50E-01 |
| 6 | rs2394401  | 30724430 | C | 0.12 | 0.11 | T | 1.14 | 0.99 | 1.31 | 7.43E-02 | 7.24E-02 |
| 6 | rs3095341  | 30726748 | A | 0.38 | 0.38 | G | 1.02 | 0.93 | 1.12 | 7.10E-01 | 6.68E-01 |
| 6 | rs3095340  | 30726939 | G | 0.14 | 0.14 | T | 0.97 | 0.85 | 1.11 | 6.85E-01 | 6.75E-01 |
| 6 | rs3094122  | 30728360 | C | 0.22 | 0.21 | A | 1.02 | 0.91 | 1.14 | 7.08E-01 | 6.69E-01 |
| 6 | rs11966040 | 30729487 | G | 0.02 | 0.02 | T | 1.14 | 0.84 | 1.55 | 3.97E-01 | 4.47E-01 |
| 6 | rs3094121  | 30730960 | A | 0.22 | 0.21 | G | 1.03 | 0.92 | 1.15 | 6.00E-01 | 5.28E-01 |
| 6 | rs9262176  | 30731330 | T | 0.03 | 0.04 | C | 0.90 | 0.70 | 1.16 | 4.26E-01 | 3.99E-01 |
| 6 | rs13214831 | 30731505 | A | 0.15 | 0.17 | G | 0.89 | 0.78 | 1.01 | 6.40E-02 | 4.85E-02 |
| 6 | rs3129975  | 30732054 | C | 0.22 | 0.21 | T | 1.03 | 0.92 | 1.15 | 6.00E-01 | 5.28E-01 |
| 6 | rs12210947 | 30735105 | G | 0.17 | 0.16 | A | 1.09 | 0.97 | 1.24 | 1.60E-01 | 1.69E-01 |
| 6 | rs11963870 | 30735229 | A | 0.02 | 0.02 | G | 1.14 | 0.84 | 1.55 | 3.96E-01 | 4.46E-01 |
| 6 | rs11964596 | 30736541 | A | 0.02 | 0.02 | G | 1.14 | 0.84 | 1.56 | 3.92E-01 | 4.35E-01 |
| 6 | rs3094117  | 30737486 | G | 0.26 | 0.26 | T | 1.01 | 0.91 | 1.12 | 8.50E-01 | 7.97E-01 |
| 6 | rs3094116  | 30738408 | A | 0.25 | 0.25 | T | 1.01 | 0.91 | 1.12 | 8.87E-01 | 8.60E-01 |
| 6 | rs6911628  | 30739846 | T | 0.25 | 0.25 | C | 1.01 | 0.90 | 1.12 | 9.16E-01 | 8.90E-01 |
| 6 | rs3130666  | 30740160 | A | 0.03 | 0.04 | G | 0.92 | 0.72 | 1.19 | 5.31E-01 | 5.68E-01 |

|   |            |          |   |      |      |   |      |      |      |          |          |
|---|------------|----------|---|------|------|---|------|------|------|----------|----------|
| 6 | rs16897888 | 30740515 | A | 0.16 | 0.15 | C | 1.10 | 0.97 | 1.25 | 1.34E-01 | 1.38E-01 |
| 6 | rs16897889 | 30740680 | G | 0.16 | 0.15 | A | 1.10 | 0.97 | 1.25 | 1.30E-01 | 1.33E-01 |
| 6 | rs17481190 | 30743014 | T | 0.15 | 0.17 | C | 0.88 | 0.77 | 0.99 | 4.01E-02 | 2.90E-02 |
| 6 | rs11757629 | 30744529 | C | 0.03 | 0.03 | A | 0.74 | 0.56 | 0.98 | 3.61E-02 | 3.55E-02 |
| 6 | rs13220225 | 30747802 | A | 0.15 | 0.17 | G | 0.89 | 0.79 | 1.01 | 7.28E-02 | 5.56E-02 |
| 6 | rs3132599  | 30748164 | C | 0.11 | 0.11 | G | 0.92 | 0.79 | 1.06 | 2.51E-01 | 2.65E-01 |
| 6 | rs9468829  | 30749233 | G | 0.13 | 0.12 | T | 1.12 | 0.97 | 1.28 | 1.23E-01 | 1.18E-01 |
| 6 | rs9468830  | 30749712 | G | 0.31 | 0.31 | T | 1.00 | 0.91 | 1.10 | 9.98E-01 | 9.48E-01 |
| 6 | rs17189427 | 30750229 | A | 0.02 | 0.02 | G | 0.95 | 0.68 | 1.32 | 7.62E-01 | 7.83E-01 |
| 6 | rs28780116 | 30755668 | C | 0.31 | 0.31 | G | 1.00 | 0.91 | 1.11 | 9.66E-01 | 9.80E-01 |
| 6 | rs16897900 | 30755893 | A | 0.31 | 0.31 | C | 1.00 | 0.91 | 1.11 | 9.66E-01 | 9.80E-01 |
| 6 | rs13201769 | 30756066 | A | 0.31 | 0.31 | G | 1.00 | 0.91 | 1.11 | 9.66E-01 | 9.80E-01 |
| 6 | rs4711228  | 30756274 | T | 0.31 | 0.31 | A | 1.00 | 0.91 | 1.11 | 9.78E-01 | 9.69E-01 |
| 6 | rs4713366  | 30756361 | T | 0.31 | 0.31 | C | 1.01 | 0.92 | 1.12 | 8.40E-01 | 8.92E-01 |
| 6 | rs3131043  | 30758466 | G | 0.41 | 0.42 | A | 0.96 | 0.88 | 1.05 | 4.00E-01 | 3.77E-01 |
| 6 | rs17189441 | 30758555 | T | 0.15 | 0.17 | C | 0.88 | 0.78 | 1.00 | 5.32E-02 | 3.90E-02 |
| 6 | rs3131050  | 30760025 | C | 0.10 | 0.11 | T | 0.91 | 0.78 | 1.05 | 2.02E-01 | 2.16E-01 |
| 6 | rs34682678 | 30760639 | C | 0.08 | 0.08 | A | 1.12 | 0.95 | 1.33 | 1.83E-01 | 1.55E-01 |
| 6 | rs3094112  | 30761734 | G | 0.22 | 0.22 | A | 1.03 | 0.92 | 1.15 | 6.35E-01 | 5.71E-01 |
| 6 | rs3129985  | 30762542 | T | 0.11 | 0.11 | C | 0.91 | 0.79 | 1.06 | 2.18E-01 | 2.33E-01 |
| 6 | rs3131060  | 30763291 | A | 0.10 | 0.11 | G | 0.91 | 0.78 | 1.05 | 2.02E-01 | 2.16E-01 |
| 6 | rs3131063  | 30763756 | A | 0.44 | 0.43 | G | 1.06 | 0.96 | 1.16 | 2.39E-01 | 2.24E-01 |
| 6 | rs12660883 | 30764420 | C | 0.15 | 0.17 | T | 0.89 | 0.78 | 1.00 | 5.85E-02 | 4.37E-02 |
| 6 | rs1264377  | 30764907 | T | 0.15 | 0.15 | C | 0.96 | 0.84 | 1.09 | 5.43E-01 | 5.74E-01 |
| 6 | rs12190167 | 30766194 | A | 0.13 | 0.12 | G | 1.10 | 0.96 | 1.26 | 1.87E-01 | 1.94E-01 |
| 6 | rs12197154 | 30766244 | C | 0.13 | 0.12 | T | 1.05 | 0.92 | 1.20 | 4.88E-01 | 5.13E-01 |
| 6 | rs4639381  | 30766765 | G | 0.28 | 0.28 | C | 0.99 | 0.90 | 1.10 | 9.09E-01 | 8.17E-01 |
| 6 | rs4713370  | 30767538 | C | 0.28 | 0.29 | A | 0.99 | 0.90 | 1.10 | 8.75E-01 | 7.82E-01 |
| 6 | rs4711235  | 30768636 | C | 0.28 | 0.29 | T | 0.99 | 0.90 | 1.10 | 8.73E-01 | 7.79E-01 |
| 6 | rs3129988  | 30769478 | T | 0.07 | 0.07 | C | 0.98 | 0.82 | 1.17 | 7.88E-01 | 8.03E-01 |
| 6 | rs9295919  | 30770000 | T | 0.28 | 0.29 | C | 0.99 | 0.89 | 1.09 | 8.37E-01 | 7.43E-01 |
| 6 | rs13198118 | 30770732 | G | 0.15 | 0.16 | T | 0.92 | 0.81 | 1.05 | 2.11E-01 | 1.74E-01 |
| 6 | rs9380192  | 30772344 | G | 0.28 | 0.29 | A | 0.99 | 0.90 | 1.10 | 8.81E-01 | 7.89E-01 |
| 6 | rs3094123  | 30772378 | T | 0.16 | 0.17 | C | 0.92 | 0.81 | 1.04 | 1.62E-01 | 2.11E-01 |

|   |            |          |   |      |      |   |      |      |      |          |          |
|---|------------|----------|---|------|------|---|------|------|------|----------|----------|
| 6 | rs4713376  | 30773314 | C | 0.14 | 0.13 | A | 1.09 | 0.96 | 1.25 | 1.87E-01 | 2.03E-01 |
| 6 | rs9378109  | 30774474 | A | 0.14 | 0.15 | C | 0.94 | 0.83 | 1.07 | 3.48E-01 | 2.99E-01 |
| 6 | rs1264362  | 30776590 | C | 0.34 | 0.31 | G | 1.11 | 1.01 | 1.23 | 3.18E-02 | 3.49E-02 |
| 6 | rs1264361  | 30777498 | C | 0.11 | 0.12 | T | 0.92 | 0.79 | 1.06 | 2.38E-01 | 2.58E-01 |
| 6 | rs9380197  | 30778203 | A | 0.29 | 0.29 | G | 0.99 | 0.90 | 1.10 | 8.51E-01 | 7.57E-01 |
| 6 | rs4327730  | 30780936 | T | 0.12 | 0.12 | C | 1.08 | 0.94 | 1.24 | 2.69E-01 | 2.82E-01 |
| 6 | rs915665   | 30781381 | T | 0.01 | 0.02 | C | 0.74 | 0.51 | 1.09 | 1.24E-01 | 9.80E-02 |
| 6 | rs12210318 | 30781904 | A | 0.12 | 0.12 | G | 1.08 | 0.94 | 1.24 | 2.92E-01 | 3.07E-01 |
| 6 | rs886424   | 30782002 | A | 0.11 | 0.12 | G | 0.92 | 0.80 | 1.07 | 2.67E-01 | 2.86E-01 |
| 6 | rs2894046  | 30782105 | C | 0.29 | 0.29 | T | 0.99 | 0.90 | 1.10 | 8.54E-01 | 7.54E-01 |
| 6 | rs2394412  | 30782235 | A | 0.29 | 0.29 | G | 0.99 | 0.89 | 1.09 | 7.94E-01 | 6.95E-01 |
| 6 | rs4713380  | 30785273 | C | 0.15 | 0.16 | T | 0.91 | 0.80 | 1.03 | 1.32E-01 | 1.05E-01 |
| 6 | rs12192760 | 30785385 | C | 0.12 | 0.11 | A | 1.10 | 0.96 | 1.27 | 1.80E-01 | 1.94E-01 |
| 6 | rs9348843  | 30786676 | A | 0.29 | 0.29 | G | 0.99 | 0.89 | 1.09 | 8.12E-01 | 7.13E-01 |
| 6 | rs4713385  | 30787593 | A | 0.15 | 0.16 | G | 0.91 | 0.80 | 1.03 | 1.23E-01 | 9.84E-02 |
| 6 | rs16897921 | 30789526 | A | 0.14 | 0.13 | G | 1.10 | 0.96 | 1.25 | 1.83E-01 | 2.00E-01 |
| 6 | rs12195964 | 30790481 | G | 0.14 | 0.13 | T | 1.10 | 0.96 | 1.25 | 1.83E-01 | 1.99E-01 |
| 6 | rs4947289  | 30791409 | T | 0.15 | 0.16 | C | 0.91 | 0.80 | 1.03 | 1.36E-01 | 1.09E-01 |
| 6 | rs4713391  | 30792235 | C | 0.14 | 0.13 | T | 1.10 | 0.96 | 1.25 | 1.77E-01 | 1.92E-01 |
| 6 | rs12192704 | 30792270 | A | 0.14 | 0.13 | G | 1.10 | 0.96 | 1.26 | 1.66E-01 | 1.79E-01 |
| 6 | rs915664   | 30794617 | G | 0.34 | 0.32 | A | 1.13 | 1.02 | 1.24 | 1.61E-02 | 1.78E-02 |
| 6 | rs9380199  | 30796271 | G | 0.29 | 0.29 | A | 0.99 | 0.90 | 1.10 | 8.74E-01 | 7.76E-01 |
| 6 | rs1264350  | 30796545 | G | 0.13 | 0.13 | A | 0.97 | 0.85 | 1.11 | 6.69E-01 | 7.45E-01 |
| 6 | rs12198723 | 30796734 | G | 0.12 | 0.11 | T | 1.08 | 0.94 | 1.24 | 2.75E-01 | 2.87E-01 |
| 6 | rs3130785  | 30796738 | T | 0.15 | 0.17 | C | 0.92 | 0.81 | 1.04 | 1.68E-01 | 2.17E-01 |
| 6 | rs1264348  | 30798473 | G | 0.32 | 0.33 | T | 0.96 | 0.87 | 1.06 | 3.83E-01 | 3.73E-01 |
| 6 | rs3130647  | 30799072 | A | 0.36 | 0.38 | G | 0.92 | 0.84 | 1.02 | 1.00E-01 | 1.28E-01 |
| 6 | rs9501030  | 30799399 | A | 0.17 | 0.17 | T | 1.01 | 0.89 | 1.14 | 9.29E-01 | 9.63E-01 |
| 6 | rs1264344  | 30800577 | A | 0.48 | 0.47 | G | 1.06 | 0.97 | 1.17 | 1.91E-01 | 2.53E-01 |
| 6 | rs1264341  | 30802465 | G | 0.11 | 0.11 | A | 0.94 | 0.81 | 1.09 | 4.19E-01 | 4.76E-01 |
| 6 | rs3130649  | 30803254 | A | 0.42 | 0.42 | T | 0.97 | 0.88 | 1.06 | 4.96E-01 | 5.60E-01 |
| 6 | rs3095352  | 30805921 | G | 0.42 | 0.42 | A | 0.97 | 0.88 | 1.06 | 5.09E-01 | 5.67E-01 |
| 6 | rs2517581  | 30809664 | A | 0.02 | 0.02 | G | 0.70 | 0.49 | 1.00 | 4.97E-02 | 3.91E-02 |
| 6 | rs2535336  | 30810654 | G | 0.41 | 0.40 | T | 1.04 | 0.95 | 1.14 | 3.84E-01 | 4.99E-01 |

|   |            |          |   |      |      |   |      |      |      |          |          |
|---|------------|----------|---|------|------|---|------|------|------|----------|----------|
| 6 | rs7759803  | 30812519 | A | 0.03 | 0.03 | G | 1.19 | 0.90 | 1.58 | 2.19E-01 | 1.86E-01 |
| 6 | rs2517576  | 30815035 | T | 0.19 | 0.19 | C | 1.00 | 0.88 | 1.12 | 9.49E-01 | 9.76E-01 |
| 6 | rs2535331  | 30816270 | T | 0.38 | 0.37 | C | 1.05 | 0.96 | 1.16 | 2.88E-01 | 3.66E-01 |
| 6 | rs3132578  | 30816865 | T | 0.40 | 0.41 | A | 0.96 | 0.88 | 1.06 | 4.42E-01 | 5.20E-01 |
| 6 | rs2250264  | 30821187 | A | 0.28 | 0.27 | G | 1.08 | 0.98 | 1.20 | 1.27E-01 | 1.54E-01 |
| 6 | rs3095345  | 30822413 | G | 0.14 | 0.17 | A | 0.83 | 0.73 | 0.95 | 5.09E-03 | 8.99E-03 |
| 6 | rs3130653  | 30822771 | C | 0.40 | 0.41 | A | 0.96 | 0.88 | 1.06 | 4.07E-01 | 4.83E-01 |
| 6 | rs9295928  | 30823630 | C | 0.15 | 0.15 | T | 1.00 | 0.88 | 1.14 | 9.79E-01 | 9.72E-01 |
| 6 | rs2844660  | 30823760 | G | 0.14 | 0.12 | A | 1.19 | 1.03 | 1.36 | 1.53E-02 | 1.62E-02 |
| 6 | rs2844659  | 30824532 | A | 0.19 | 0.19 | G | 1.00 | 0.89 | 1.13 | 9.87E-01 | 9.47E-01 |
| 6 | rs9468841  | 30825287 | C | 0.08 | 0.08 | T | 1.00 | 0.85 | 1.18 | 9.99E-01 | 9.74E-01 |
| 6 | rs2535327  | 30826904 | G | 0.38 | 0.36 | A | 1.07 | 0.97 | 1.18 | 1.69E-01 | 2.19E-01 |
| 6 | rs2844657  | 30829522 | C | 0.19 | 0.18 | T | 1.01 | 0.90 | 1.14 | 8.74E-01 | 8.13E-01 |
| 6 | rs7761138  | 30830292 | A | 0.08 | 0.07 | C | 1.09 | 0.92 | 1.30 | 3.25E-01 | 3.21E-01 |
| 6 | rs3130791  | 30831843 | T | 0.40 | 0.41 | C | 0.96 | 0.88 | 1.06 | 4.12E-01 | 4.88E-01 |
| 6 | rs3130793  | 30832357 | T | 0.40 | 0.41 | C | 0.97 | 0.88 | 1.06 | 4.57E-01 | 5.41E-01 |
| 6 | rs3130794  | 30832810 | T | 0.40 | 0.41 | C | 0.97 | 0.88 | 1.06 | 4.69E-01 | 5.54E-01 |
| 6 | rs10947109 | 30836225 | C | 0.02 | 0.02 | T | 0.94 | 0.65 | 1.37 | 7.54E-01 | 7.09E-01 |
| 6 | rs2535340  | 30838497 | G | 0.11 | 0.11 | A | 0.94 | 0.81 | 1.09 | 4.23E-01 | 4.77E-01 |
| 6 | rs2844654  | 30838688 | C | 0.38 | 0.37 | A | 1.05 | 0.96 | 1.16 | 3.02E-01 | 3.82E-01 |
| 6 | rs3132573  | 30840688 | T | 0.37 | 0.38 | C | 0.94 | 0.86 | 1.04 | 2.41E-01 | 2.86E-01 |
| 6 | rs3130796  | 30840950 | C | 0.40 | 0.41 | T | 0.97 | 0.88 | 1.06 | 4.71E-01 | 5.52E-01 |
| 6 | rs7746003  | 30842894 | A | 0.03 | 0.02 | T | 1.24 | 0.93 | 1.67 | 1.48E-01 | 1.20E-01 |
| 6 | rs1264333  | 30844314 | G | 0.38 | 0.37 | A | 1.05 | 0.96 | 1.16 | 3.02E-01 | 3.82E-01 |
| 6 | rs1264331  | 30846830 | A | 0.39 | 0.37 | C | 1.05 | 0.96 | 1.16 | 2.84E-01 | 3.60E-01 |
| 6 | rs7756521  | 30848253 | C | 0.19 | 0.18 | T | 1.02 | 0.91 | 1.15 | 6.91E-01 | 6.65E-01 |
| 6 | rs885910   | 30849124 | A | 0.37 | 0.37 | T | 1.01 | 0.92 | 1.11 | 8.62E-01 | 7.91E-01 |
| 6 | rs9295930  | 30849822 | A | 0.15 | 0.15 | G | 0.99 | 0.88 | 1.13 | 9.23E-01 | 9.27E-01 |
| 6 | rs9501032  | 30850191 | C | 0.19 | 0.18 | T | 1.03 | 0.91 | 1.15 | 6.63E-01 | 6.34E-01 |
| 6 | rs9461638  | 30851305 | C | 0.19 | 0.18 | G | 1.02 | 0.91 | 1.15 | 6.87E-01 | 6.59E-01 |
| 6 | rs9468842  | 30852747 | T | 0.19 | 0.18 | C | 1.03 | 0.91 | 1.16 | 6.60E-01 | 6.31E-01 |
| 6 | rs3131034  | 30853796 | G | 0.21 | 0.23 | A | 0.92 | 0.83 | 1.03 | 1.58E-01 | 1.97E-01 |
| 6 | rs6901464  | 30854090 | T | 0.19 | 0.18 | G | 1.03 | 0.91 | 1.16 | 6.51E-01 | 6.21E-01 |
| 6 | rs4618569  | 30855251 | A | 0.19 | 0.18 | G | 1.03 | 0.91 | 1.16 | 6.39E-01 | 6.11E-01 |

|   |            |          |   |      |      |   |      |      |      |          |          |
|---|------------|----------|---|------|------|---|------|------|------|----------|----------|
| 6 | rs1264323  | 30855907 | T | 0.37 | 0.37 | C | 1.01 | 0.92 | 1.11 | 7.86E-01 | 7.11E-01 |
| 6 | rs2229933  | 30857072 | C | 0.19 | 0.18 | G | 1.02 | 0.91 | 1.15 | 7.01E-01 | 6.74E-01 |
| 6 | rs1264319  | 30862423 | A | 0.19 | 0.19 | G | 0.99 | 0.88 | 1.11 | 8.64E-01 | 9.31E-01 |
| 6 | rs1264318  | 30863530 | C | 0.19 | 0.19 | G | 1.00 | 0.89 | 1.12 | 9.68E-01 | 9.68E-01 |
| 6 | rs886422   | 30864279 | A | 0.11 | 0.11 | G | 0.94 | 0.81 | 1.09 | 4.29E-01 | 4.84E-01 |
| 6 | rs1049623  | 30864829 | G | 0.37 | 0.37 | A | 1.01 | 0.92 | 1.11 | 8.36E-01 | 7.61E-01 |
| 6 | rs6933271  | 30867830 | G | 0.01 | 0.02 | T | 0.83 | 0.57 | 1.21 | 3.26E-01 | 3.09E-01 |
| 6 | rs9295931  | 30869714 | T | 0.19 | 0.18 | C | 1.03 | 0.91 | 1.16 | 6.59E-01 | 6.27E-01 |
| 6 | rs3869086  | 30870168 | A | 0.19 | 0.18 | C | 1.03 | 0.91 | 1.16 | 6.59E-01 | 6.27E-01 |
| 6 | rs12206075 | 30871000 | C | 0.19 | 0.18 | T | 1.03 | 0.91 | 1.16 | 6.58E-01 | 6.26E-01 |
| 6 | rs13215409 | 30871619 | A | 0.19 | 0.18 | C | 1.03 | 0.91 | 1.16 | 6.59E-01 | 6.27E-01 |
| 6 | rs2284175  | 30875145 | C | 0.19 | 0.18 | T | 1.03 | 0.92 | 1.16 | 6.14E-01 | 5.79E-01 |
| 6 | rs1052693  | 30876152 | T | 0.19 | 0.18 | C | 1.03 | 0.92 | 1.16 | 6.06E-01 | 5.68E-01 |
| 6 | rs3218816  | 30878857 | A | 0.04 | 0.03 | G | 1.25 | 0.98 | 1.60 | 7.77E-02 | 8.99E-02 |
| 6 | rs886420   | 30879636 | A | 0.10 | 0.11 | G | 0.93 | 0.80 | 1.08 | 3.52E-01 | 3.98E-01 |
| 6 | rs3218822  | 30880336 | C | 0.02 | 0.02 | T | 1.41 | 1.03 | 1.93 | 3.15E-02 | 2.31E-02 |
| 6 | rs1264304  | 30882415 | A | 0.11 | 0.11 | G | 0.94 | 0.81 | 1.10 | 4.45E-01 | 5.00E-01 |
| 6 | rs1264303  | 30882513 | C | 0.38 | 0.37 | T | 1.05 | 0.95 | 1.15 | 3.16E-01 | 4.05E-01 |
| 6 | rs1264302  | 30882634 | A | 0.38 | 0.37 | G | 1.05 | 0.96 | 1.16 | 3.00E-01 | 3.86E-01 |
| 6 | rs1264301  | 30882781 | A | 0.38 | 0.37 | C | 1.05 | 0.95 | 1.15 | 3.15E-01 | 4.06E-01 |
| 6 | rs1264298  | 30884436 | C | 0.38 | 0.37 | T | 1.05 | 0.96 | 1.16 | 3.02E-01 | 3.90E-01 |
| 6 | rs9262288  | 30885639 | G | 0.38 | 0.37 | A | 1.05 | 0.95 | 1.15 | 3.16E-01 | 4.05E-01 |
| 6 | rs9262290  | 30885821 | A | 0.38 | 0.37 | G | 1.05 | 0.95 | 1.15 | 3.16E-01 | 4.05E-01 |
| 6 | rs9262293  | 30886350 | G | 0.38 | 0.37 | C | 1.05 | 0.95 | 1.15 | 3.16E-01 | 4.05E-01 |
| 6 | rs2517468  | 30888169 | T | 0.38 | 0.37 | C | 1.05 | 0.96 | 1.15 | 3.12E-01 | 4.00E-01 |
| 6 | rs7766094  | 30888617 | A | 0.07 | 0.06 | G | 1.09 | 0.90 | 1.32 | 3.67E-01 | 3.42E-01 |
| 6 | rs2517467  | 30889260 | C | 0.45 | 0.46 | T | 0.96 | 0.88 | 1.06 | 4.36E-01 | 5.38E-01 |
| 6 | rs2074511  | 30889389 | G | 0.16 | 0.16 | A | 1.01 | 0.89 | 1.14 | 8.88E-01 | 8.93E-01 |
| 6 | rs885905   | 30890431 | T | 0.26 | 0.27 | C | 0.92 | 0.83 | 1.02 | 1.27E-01 | 1.43E-01 |
| 6 | rs2074506  | 30890483 | A | 0.38 | 0.37 | C | 1.05 | 0.96 | 1.16 | 2.93E-01 | 3.77E-01 |
| 6 | rs753725   | 30890871 | A | 0.45 | 0.46 | G | 0.97 | 0.88 | 1.06 | 4.52E-01 | 5.55E-01 |
| 6 | rs2532938  | 30893831 | T | 0.39 | 0.37 | C | 1.05 | 0.96 | 1.16 | 3.01E-01 | 3.87E-01 |
| 6 | rs4678     | 30893941 | T | 0.20 | 0.19 | C | 1.05 | 0.93 | 1.18 | 4.43E-01 | 3.64E-01 |
| 6 | rs2532934  | 30894759 | C | 0.45 | 0.46 | T | 0.96 | 0.87 | 1.05 | 3.62E-01 | 4.56E-01 |

|   |            |          |   |      |      |   |      |      |      |          |          |
|---|------------|----------|---|------|------|---|------|------|------|----------|----------|
| 6 | rs3873332  | 30895990 | C | 0.16 | 0.16 | T | 1.00 | 0.88 | 1.14 | 9.98E-01 | 1.00E+00 |
| 6 | rs3873334  | 30896147 | T | 0.16 | 0.16 | C | 0.98 | 0.87 | 1.11 | 7.55E-01 | 7.55E-01 |
| 6 | rs2517459  | 30897022 | A | 0.22 | 0.24 | G | 0.92 | 0.83 | 1.03 | 1.42E-01 | 1.67E-01 |
| 6 | rs2532929  | 30897774 | C | 0.40 | 0.40 | T | 1.02 | 0.92 | 1.12 | 7.46E-01 | 9.05E-01 |
| 6 | rs2844652  | 30898687 | A | 0.38 | 0.37 | G | 1.05 | 0.96 | 1.16 | 3.01E-01 | 3.88E-01 |
| 6 | rs2286655  | 30899746 | T | 0.16 | 0.16 | C | 1.00 | 0.88 | 1.14 | 9.98E-01 | 1.00E+00 |
| 6 | rs2844651  | 30900664 | A | 0.46 | 0.47 | G | 0.96 | 0.88 | 1.06 | 4.07E-01 | 5.05E-01 |
| 6 | rs7764239  | 30900919 | A | 0.06 | 0.06 | C | 1.12 | 0.92 | 1.36 | 2.66E-01 | 2.35E-01 |
| 6 | rs10947114 | 30902181 | T | 0.15 | 0.15 | C | 1.01 | 0.89 | 1.15 | 8.75E-01 | 8.67E-01 |
| 6 | rs2844649  | 30904272 | T | 0.09 | 0.11 | C | 0.86 | 0.74 | 1.00 | 5.49E-02 | 7.02E-02 |
| 6 | rs12697941 | 30904714 | A | 0.15 | 0.15 | G | 1.00 | 0.88 | 1.14 | 9.52E-01 | 9.49E-01 |
| 6 | rs3132571  | 30905313 | C | 0.36 | 0.36 | T | 1.02 | 0.92 | 1.12 | 7.61E-01 | 6.94E-01 |
| 6 | rs6933400  | 30907176 | T | 0.13 | 0.13 | C | 1.01 | 0.88 | 1.16 | 9.29E-01 | 9.32E-01 |
| 6 | rs6933909  | 30907266 | A | 0.13 | 0.13 | G | 1.01 | 0.88 | 1.16 | 9.12E-01 | 9.14E-01 |
| 6 | rs3131921  | 30907335 | G | 0.13 | 0.13 | A | 1.00 | 0.88 | 1.15 | 9.70E-01 | 8.62E-01 |
| 6 | rs4711249  | 30908266 | A | 0.16 | 0.16 | G | 1.00 | 0.89 | 1.14 | 9.48E-01 | 9.55E-01 |
| 6 | rs13206144 | 30912382 | A | 0.02 | 0.02 | G | 1.15 | 0.81 | 1.63 | 4.36E-01 | 4.37E-01 |
| 6 | rs2844702  | 30912481 | T | 0.39 | 0.38 | C | 1.05 | 0.96 | 1.16 | 2.95E-01 | 3.75E-01 |
| 6 | rs2844701  | 30912691 | C | 0.10 | 0.11 | T | 0.85 | 0.73 | 0.99 | 3.50E-02 | 4.60E-02 |
| 6 | rs2517451  | 30914751 | G | 0.10 | 0.11 | A | 0.86 | 0.74 | 1.01 | 6.02E-02 | 7.61E-02 |
| 6 | rs3130782  | 30914843 | T | 0.14 | 0.14 | C | 1.01 | 0.89 | 1.16 | 8.48E-01 | 7.66E-01 |
| 6 | rs3132580  | 30920124 | T | 0.13 | 0.13 | C | 1.00 | 0.87 | 1.15 | 9.63E-01 | 8.48E-01 |
| 6 | rs2240804  | 30920890 | T | 0.38 | 0.37 | C | 1.06 | 0.97 | 1.17 | 2.04E-01 | 2.60E-01 |
| 6 | rs3757340  | 30921882 | C | 0.28 | 0.28 | T | 1.01 | 0.91 | 1.12 | 8.57E-01 | 8.61E-01 |
| 6 | rs12212418 | 30924024 | T | 0.28 | 0.28 | C | 1.01 | 0.91 | 1.12 | 8.02E-01 | 8.04E-01 |
| 6 | rs11753326 | 30925985 | C | 0.09 | 0.09 | T | 0.99 | 0.85 | 1.16 | 9.33E-01 | 9.34E-01 |
| 6 | rs2844697  | 30932309 | A | 0.34 | 0.35 | G | 0.96 | 0.87 | 1.06 | 4.03E-01 | 4.19E-01 |
| 6 | rs3095150  | 30932532 | G | 0.37 | 0.38 | A | 0.94 | 0.85 | 1.03 | 1.67E-01 | 1.43E-01 |
| 6 | rs2532924  | 30932682 | A | 0.42 | 0.45 | G | 0.92 | 0.84 | 1.00 | 5.59E-02 | 5.14E-02 |
| 6 | rs3095089  | 30933794 | A | 0.17 | 0.17 | C | 0.98 | 0.86 | 1.11 | 7.18E-01 | 8.26E-01 |
| 6 | rs2532919  | 30933975 | G | 0.15 | 0.15 | T | 1.00 | 0.88 | 1.14 | 9.88E-01 | 8.73E-01 |
| 6 | rs2844690  | 30940032 | A | 0.14 | 0.14 | G | 0.96 | 0.84 | 1.09 | 5.14E-01 | 4.20E-01 |
| 6 | rs17196185 | 30940505 | T | 0.05 | 0.06 | C | 0.87 | 0.71 | 1.07 | 1.88E-01 | 1.70E-01 |
| 6 | rs2517446  | 30940945 | C | 0.14 | 0.15 | T | 0.97 | 0.85 | 1.11 | 6.89E-01 | 5.76E-01 |

|   |            |          |   |      |      |   |      |      |      |          |          |
|---|------------|----------|---|------|------|---|------|------|------|----------|----------|
| 6 | rs9262315  | 30942387 | C | 0.14 | 0.15 | T | 0.97 | 0.85 | 1.11 | 6.89E-01 | 5.76E-01 |
| 6 | rs2517442  | 30942447 | T | 0.14 | 0.15 | C | 0.97 | 0.85 | 1.11 | 6.89E-01 | 5.76E-01 |
| 6 | rs3131931  | 30945265 | T | 0.24 | 0.25 | A | 0.94 | 0.84 | 1.05 | 2.50E-01 | 2.92E-01 |
| 6 | rs34853064 | 30945625 | T | 0.07 | 0.06 | A | 1.06 | 0.88 | 1.28 | 5.20E-01 | 5.26E-01 |
| 6 | rs2844682  | 30946148 | T | 0.14 | 0.15 | C | 0.98 | 0.86 | 1.11 | 7.38E-01 | 6.23E-01 |
| 6 | rs2844680  | 30946496 | A | 0.42 | 0.42 | C | 1.00 | 0.91 | 1.10 | 9.63E-01 | 9.06E-01 |
| 6 | rs9394023  | 30947042 | A | 0.15 | 0.13 | C | 1.26 | 1.10 | 1.43 | 6.37E-04 | 6.82E-04 |
| 6 | rs2517431  | 30947378 | T | 0.28 | 0.29 | G | 0.94 | 0.84 | 1.04 | 1.99E-01 | 2.26E-01 |
| 6 | rs3094084  | 30947509 | A | 0.16 | 0.16 | T | 1.00 | 0.88 | 1.14 | 9.91E-01 | 9.23E-01 |
| 6 | rs2517426  | 30949430 | T | 0.14 | 0.15 | G | 0.96 | 0.84 | 1.09 | 5.27E-01 | 4.35E-01 |
| 6 | rs2517425  | 30949670 | C | 0.26 | 0.28 | A | 0.92 | 0.83 | 1.02 | 1.30E-01 | 1.53E-01 |
| 6 | rs2517422  | 30950589 | A | 0.14 | 0.15 | G | 0.98 | 0.86 | 1.11 | 7.38E-01 | 6.23E-01 |
| 6 | rs2530700  | 30951367 | G | 0.14 | 0.15 | A | 0.98 | 0.86 | 1.11 | 7.21E-01 | 6.07E-01 |
| 6 | rs2517419  | 30952873 | T | 0.14 | 0.15 | A | 0.98 | 0.86 | 1.11 | 7.38E-01 | 6.23E-01 |
| 6 | rs2530699  | 30953240 | A | 0.14 | 0.15 | T | 0.98 | 0.86 | 1.11 | 7.21E-01 | 6.08E-01 |
| 6 | rs1634731  | 30955681 | G | 0.17 | 0.18 | A | 0.90 | 0.80 | 1.02 | 9.29E-02 | 1.13E-01 |
| 6 | rs886403   | 30957618 | C | 0.25 | 0.27 | T | 0.91 | 0.82 | 1.01 | 7.07E-02 | 8.49E-02 |
| 6 | rs3873342  | 30957766 | G | 0.10 | 0.09 | A | 1.02 | 0.87 | 1.19 | 8.08E-01 | 7.98E-01 |
| 6 | rs34503701 | 30960221 | T | 0.07 | 0.06 | A | 1.11 | 0.92 | 1.35 | 2.65E-01 | 2.76E-01 |
| 6 | rs2844673  | 30961926 | A | 0.14 | 0.15 | G | 0.99 | 0.87 | 1.13 | 8.82E-01 | 7.52E-01 |
| 6 | rs9468857  | 30963143 | G | 0.01 | 0.01 | A | 0.98 | 0.61 | 1.58 | 9.39E-01 | 8.58E-01 |
| 6 | rs2517409  | 30964393 | G | 0.14 | 0.15 | A | 0.99 | 0.86 | 1.12 | 8.22E-01 | 6.96E-01 |
| 6 | rs2252926  | 30966304 | G | 0.14 | 0.15 | A | 0.98 | 0.86 | 1.12 | 8.19E-01 | 6.93E-01 |
| 6 | rs2517408  | 30966453 | G | 0.13 | 0.13 | A | 0.96 | 0.84 | 1.10 | 5.30E-01 | 4.38E-01 |
| 6 | rs2429295  | 30969498 | G | 0.14 | 0.15 | C | 0.99 | 0.87 | 1.13 | 8.64E-01 | 7.35E-01 |
| 6 | rs2508016  | 30969527 | C | 0.16 | 0.16 | G | 0.99 | 0.87 | 1.12 | 8.42E-01 | 7.33E-01 |
| 6 | rs2844668  | 30972121 | A | 0.21 | 0.23 | T | 0.93 | 0.83 | 1.04 | 1.84E-01 | 2.11E-01 |
| 6 | rs380808   | 30972202 | T | 0.14 | 0.15 | C | 0.99 | 0.87 | 1.12 | 8.38E-01 | 7.16E-01 |
| 6 | rs436376   | 30972390 | A | 0.14 | 0.15 | C | 0.98 | 0.86 | 1.12 | 7.69E-01 | 6.47E-01 |
| 6 | rs1634717  | 30972589 | T | 0.41 | 0.43 | G | 0.89 | 0.81 | 0.98 | 1.34E-02 | 1.16E-02 |
| 6 | rs1634718  | 30972865 | G | 0.24 | 0.25 | A | 0.93 | 0.83 | 1.04 | 1.81E-01 | 2.14E-01 |
| 6 | rs1634719  | 30973165 | G | 0.26 | 0.29 | A | 0.88 | 0.79 | 0.97 | 1.36E-02 | 1.67E-02 |
| 6 | rs2523921  | 30975090 | C | 0.14 | 0.15 | T | 0.98 | 0.86 | 1.12 | 7.82E-01 | 6.59E-01 |
| 6 | rs2523923  | 30975141 | A | 0.14 | 0.15 | G | 0.98 | 0.86 | 1.12 | 7.41E-01 | 6.21E-01 |

|   |            |          |   |      |      |   |      |      |      |          |          |
|---|------------|----------|---|------|------|---|------|------|------|----------|----------|
| 6 | rs2523924  | 30975224 | A | 0.14 | 0.15 | G | 0.98 | 0.86 | 1.12 | 7.69E-01 | 6.47E-01 |
| 6 | rs1632854  | 30975649 | T | 0.41 | 0.43 | A | 0.89 | 0.81 | 0.98 | 1.66E-02 | 1.46E-02 |
| 6 | rs28360974 | 30976219 | A | 0.06 | 0.04 | G | 1.46 | 1.18 | 1.81 | 4.16E-04 | 4.76E-04 |
| 6 | rs1634721  | 30977680 | A | 0.11 | 0.11 | G | 0.96 | 0.83 | 1.12 | 6.20E-01 | 6.81E-01 |
| 6 | rs2530716  | 30978196 | G | 0.14 | 0.15 | A | 0.98 | 0.86 | 1.12 | 7.82E-01 | 6.59E-01 |
| 6 | rs12203410 | 30978746 | A | 0.15 | 0.13 | G | 1.15 | 1.02 | 1.31 | 2.84E-02 | 2.88E-02 |
| 6 | rs1634723  | 30979156 | C | 0.23 | 0.25 | T | 0.93 | 0.84 | 1.04 | 2.16E-01 | 2.48E-01 |
| 6 | rs3869095  | 30980015 | T | 0.10 | 0.09 | C | 1.02 | 0.87 | 1.19 | 8.43E-01 | 8.29E-01 |
| 6 | rs6913305  | 30981307 | T | 0.39 | 0.36 | C | 1.10 | 1.00 | 1.21 | 5.74E-02 | 7.28E-02 |
| 6 | rs9391701  | 30983263 | A | 0.16 | 0.13 | G | 1.22 | 1.07 | 1.39 | 3.07E-03 | 3.29E-03 |
| 6 | rs1619376  | 30983326 | T | 0.21 | 0.22 | C | 0.93 | 0.84 | 1.04 | 2.31E-01 | 2.73E-01 |
| 6 | rs3871466  | 30983683 | G | 0.16 | 0.13 | A | 1.22 | 1.07 | 1.39 | 3.32E-03 | 3.54E-03 |
| 6 | rs6910700  | 30985957 | G | 0.39 | 0.36 | A | 1.10 | 1.00 | 1.21 | 5.25E-02 | 6.64E-02 |
| 6 | rs9262495  | 30986527 | C | 0.13 | 0.14 | T | 0.97 | 0.85 | 1.11 | 6.50E-01 | 5.51E-01 |
| 6 | rs4713412  | 30987211 | G | 0.39 | 0.36 | A | 1.10 | 1.00 | 1.21 | 5.47E-02 | 6.93E-02 |
| 6 | rs7758976  | 30987786 | G | 0.47 | 0.43 | A | 1.19 | 1.08 | 1.30 | 3.00E-04 | 4.79E-04 |
| 6 | rs9262528  | 30989770 | A | 0.13 | 0.14 | G | 0.97 | 0.85 | 1.12 | 7.10E-01 | 6.14E-01 |
| 6 | rs6903912  | 30991559 | A | 0.23 | 0.23 | G | 0.99 | 0.88 | 1.10 | 8.20E-01 | 7.42E-01 |
| 6 | rs12198448 | 30992346 | C | 0.11 | 0.11 | T | 0.97 | 0.84 | 1.12 | 6.58E-01 | 6.63E-01 |
| 6 | rs2523898  | 30993533 | T | 0.47 | 0.49 | C | 0.93 | 0.85 | 1.02 | 1.28E-01 | 1.36E-01 |
| 6 | rs4713420  | 30993567 | T | 0.18 | 0.18 | G | 0.99 | 0.88 | 1.12 | 8.82E-01 | 9.22E-01 |
| 6 | rs12179536 | 30993590 | G | 0.18 | 0.18 | A | 0.98 | 0.87 | 1.11 | 7.45E-01 | 7.32E-01 |
| 6 | rs2523897  | 30993958 | T | 0.16 | 0.17 | C | 0.96 | 0.85 | 1.09 | 5.26E-01 | 5.68E-01 |
| 6 | rs12665700 | 30996132 | T | 0.10 | 0.12 | C | 0.80 | 0.69 | 0.93 | 3.08E-03 | 2.28E-03 |
| 6 | rs6457301  | 30998879 | C | 0.33 | 0.34 | T | 0.93 | 0.85 | 1.03 | 1.55E-01 | 1.39E-01 |
| 6 | rs10947121 | 30999997 | C | 0.35 | 0.36 | T | 0.94 | 0.86 | 1.04 | 2.42E-01 | 2.01E-01 |
| 6 | rs13210132 | 31001143 | G | 0.05 | 0.05 | A | 1.03 | 0.84 | 1.27 | 7.86E-01 | 8.14E-01 |
| 6 | rs9468862  | 31001355 | A | 0.01 | 0.02 | G | 0.47 | 0.30 | 0.76 | 1.45E-03 | 1.24E-03 |
| 6 | rs6933349  | 31002013 | A | 0.21 | 0.21 | G | 1.03 | 0.92 | 1.15 | 5.99E-01 | 6.02E-01 |
| 6 | rs28732082 | 31004521 | A | 0.06 | 0.06 | G | 1.08 | 0.89 | 1.32 | 4.36E-01 | 4.27E-01 |
| 6 | rs2844670  | 31005726 | C | 0.15 | 0.17 | T | 0.85 | 0.75 | 0.97 | 1.32E-02 | 1.80E-02 |
| 6 | rs2844665  | 31006855 | A | 0.36 | 0.38 | G | 0.94 | 0.85 | 1.03 | 1.89E-01 | 2.10E-01 |
| 6 | rs12201301 | 31007557 | A | 0.04 | 0.03 | G | 1.45 | 1.15 | 1.83 | 1.84E-03 | 1.99E-03 |
| 6 | rs2517552  | 31007590 | G | 0.35 | 0.37 | A | 0.94 | 0.85 | 1.03 | 1.70E-01 | 1.98E-01 |



|   |            |          |   |      |      |   |      |      |      |          |          |
|---|------------|----------|---|------|------|---|------|------|------|----------|----------|
| 6 | rs2517549  | 31008598 | T | 0.37 | 0.35 | G | 1.08 | 0.98 | 1.19 | 1.13E-01 | 1.04E-01 |
| 6 | rs9262560  | 31008626 | T | 0.04 | 0.03 | C | 1.09 | 0.86 | 1.39 | 4.75E-01 | 4.58E-01 |
| 6 | rs2508015  | 31010200 | T | 0.41 | 0.38 | C | 1.09 | 1.00 | 1.20 | 6.01E-02 | 5.33E-02 |
| 6 | rs2844647  | 31011013 | T | 0.48 | 0.46 | C | 1.11 | 1.02 | 1.22 | 2.17E-02 | 2.09E-02 |
| 6 | rs2248386  | 31011247 | T | 0.48 | 0.46 | C | 1.11 | 1.02 | 1.22 | 2.10E-02 | 2.02E-02 |
| 6 | rs10947129 | 31011662 | A | 0.15 | 0.16 | G | 0.91 | 0.80 | 1.03 | 1.44E-01 | 1.18E-01 |
| 6 | rs12528584 | 31011845 | T | 0.15 | 0.16 | C | 0.91 | 0.80 | 1.03 | 1.31E-01 | 1.08E-01 |
| 6 | rs7756294  | 31012356 | A | 0.05 | 0.05 | G | 0.85 | 0.69 | 1.06 | 1.45E-01 | 1.10E-01 |
| 6 | rs2523872  | 31012730 | A | 0.35 | 0.37 | G | 0.94 | 0.85 | 1.03 | 1.81E-01 | 2.10E-01 |
| 6 | rs17190106 | 31013351 | A | 0.07 | 0.06 | G | 1.11 | 0.92 | 1.33 | 2.80E-01 | 2.91E-01 |
| 6 | rs2523870  | 31014116 | G | 0.36 | 0.37 | A | 0.95 | 0.86 | 1.05 | 2.94E-01 | 3.32E-01 |
| 6 | rs9262582  | 31014305 | A | 0.13 | 0.08 | C | 1.62 | 1.40 | 1.89 | 2.00E-10 | 1.58E-10 |
| 6 | rs9394032  | 31016230 | T | 0.11 | 0.13 | A | 0.78 | 0.68 | 0.90 | 6.94E-04 | 4.82E-04 |
| 6 | rs2251830  | 31016978 | A | 0.48 | 0.44 | C | 1.16 | 1.06 | 1.27 | 1.11E-03 | 1.20E-03 |
| 6 | rs2517532  | 31018407 | T | 0.42 | 0.43 | C | 0.96 | 0.87 | 1.05 | 3.46E-01 | 3.90E-01 |
| 6 | rs2523864  | 31018546 | A | 0.48 | 0.44 | G | 1.16 | 1.06 | 1.27 | 1.47E-03 | 1.57E-03 |
| 6 | rs9295947  | 31019460 | A | 0.11 | 0.13 | G | 0.79 | 0.68 | 0.91 | 1.36E-03 | 9.92E-04 |
| 6 | rs9262632  | 31024808 | G | 0.05 | 0.07 | A | 0.78 | 0.64 | 0.95 | 1.54E-02 | 1.02E-02 |
| 6 | rs2523849  | 31025051 | G | 0.14 | 0.17 | A | 0.85 | 0.75 | 0.96 | 1.07E-02 | 7.24E-03 |
| 6 | rs2523848  | 31025104 | T | 0.14 | 0.17 | C | 0.85 | 0.75 | 0.96 | 1.07E-02 | 7.24E-03 |
| 6 | rs9262633  | 31025265 | G | 0.25 | 0.23 | C | 1.11 | 1.00 | 1.24 | 4.98E-02 | 5.95E-02 |
| 6 | rs9262638  | 31025989 | T | 0.25 | 0.23 | C | 1.11 | 1.00 | 1.24 | 4.79E-02 | 5.78E-02 |
| 6 | rs9262639  | 31026009 | T | 0.25 | 0.23 | C | 1.12 | 1.00 | 1.24 | 4.75E-02 | 5.69E-02 |
| 6 | rs2428514  | 31027516 | T | 0.10 | 0.13 | C | 0.78 | 0.67 | 0.90 | 4.86E-04 | 3.25E-04 |
| 6 | rs2517518  | 31028345 | A | 0.14 | 0.16 | G | 0.86 | 0.76 | 0.98 | 1.95E-02 | 1.38E-02 |
| 6 | rs9262648  | 31029173 | A | 0.25 | 0.23 | C | 1.11 | 1.00 | 1.24 | 4.96E-02 | 5.83E-02 |
| 6 | rs9262651  | 31029455 | T | 0.26 | 0.24 | C | 1.10 | 0.99 | 1.22 | 8.04E-02 | 9.02E-02 |
| 6 | rs2517511  | 31029918 | G | 0.40 | 0.40 | T | 0.99 | 0.90 | 1.08 | 7.55E-01 | 6.54E-01 |
| 6 | rs2523840  | 31030425 | T | 0.14 | 0.16 | C | 0.86 | 0.76 | 0.97 | 1.84E-02 | 1.30E-02 |
| 6 | rs2256436  | 31031381 | C | 0.39 | 0.40 | T | 0.99 | 0.90 | 1.09 | 8.12E-01 | 7.20E-01 |
| 6 | rs2517506  | 31031680 | G | 0.14 | 0.17 | A | 0.85 | 0.75 | 0.96 | 1.08E-02 | 7.40E-03 |
| 6 | rs2394423  | 31032042 | T | 0.25 | 0.23 | C | 1.11 | 1.00 | 1.24 | 5.55E-02 | 6.54E-02 |
| 6 | rs2517504  | 31032370 | C | 0.40 | 0.40 | A | 0.98 | 0.90 | 1.08 | 7.34E-01 | 6.33E-01 |
| 6 | rs9262656  | 31034264 | G | 0.25 | 0.23 | A | 1.11 | 1.00 | 1.24 | 5.21E-02 | 6.16E-02 |

|   |            |          |   |      |      |   |      |      |      |          |          |
|---|------------|----------|---|------|------|---|------|------|------|----------|----------|
| 6 | rs2517497  | 31036783 | C | 0.40 | 0.40 | T | 0.99 | 0.90 | 1.08 | 7.62E-01 | 6.59E-01 |
| 6 | rs2517491  | 31038338 | G | 0.01 | 0.02 | A | 0.72 | 0.50 | 1.03 | 7.35E-02 | 6.13E-02 |
| 6 | rs2517490  | 31038756 | A | 0.01 | 0.02 | C | 0.70 | 0.48 | 1.01 | 5.61E-02 | 4.60E-02 |
| 6 | rs2523889  | 31040298 | C | 0.40 | 0.40 | G | 0.98 | 0.90 | 1.08 | 7.41E-01 | 6.49E-01 |
| 6 | rs2523887  | 31040725 | C | 0.21 | 0.26 | T | 0.75 | 0.67 | 0.83 | 1.54E-07 | 5.29E-08 |
| 6 | rs2523884  | 31041155 | A | 0.39 | 0.40 | G | 0.99 | 0.90 | 1.09 | 8.19E-01 | 7.27E-01 |
| 6 | rs2517489  | 31042306 | T | 0.39 | 0.40 | C | 0.99 | 0.90 | 1.09 | 8.32E-01 | 7.35E-01 |
| 6 | rs2523881  | 31042608 | C | 0.39 | 0.40 | A | 0.99 | 0.90 | 1.09 | 8.34E-01 | 7.38E-01 |
| 6 | rs2517478  | 31044802 | A | 0.39 | 0.40 | C | 0.99 | 0.90 | 1.09 | 8.44E-01 | 7.46E-01 |
| 6 | rs2517477  | 31044863 | T | 0.39 | 0.40 | C | 0.99 | 0.90 | 1.09 | 8.44E-01 | 7.46E-01 |
| 6 | rs2523836  | 31047145 | A | 0.39 | 0.40 | G | 0.99 | 0.90 | 1.09 | 8.57E-01 | 7.59E-01 |
| 6 | rs17190351 | 31047448 | A | 0.02 | 0.02 | G | 0.67 | 0.48 | 0.94 | 1.88E-02 | 1.66E-02 |
| 6 | rs2523895  | 31047471 | G | 0.40 | 0.40 | T | 0.99 | 0.90 | 1.09 | 8.30E-01 | 7.26E-01 |
| 6 | rs2106067  | 31048263 | G | 0.39 | 0.40 | A | 0.99 | 0.90 | 1.09 | 8.45E-01 | 7.47E-01 |
| 6 | rs6941772  | 31048916 | G | 0.40 | 0.40 | C | 0.99 | 0.90 | 1.08 | 8.07E-01 | 7.04E-01 |
| 6 | rs9380215  | 31049655 | A | 0.07 | 0.07 | G | 1.00 | 0.83 | 1.20 | 9.96E-01 | 9.69E-01 |
| 6 | rs9263473  | 31050179 | G | 0.40 | 0.40 | A | 0.99 | 0.90 | 1.08 | 8.00E-01 | 6.96E-01 |
| 6 | rs2535318  | 31051388 | A | 0.40 | 0.40 | G | 0.99 | 0.90 | 1.08 | 8.12E-01 | 7.08E-01 |
| 6 | rs2535315  | 31052127 | A | 0.39 | 0.40 | G | 0.99 | 0.90 | 1.09 | 8.44E-01 | 7.46E-01 |
| 6 | rs2535311  | 31052684 | C | 0.39 | 0.40 | T | 0.99 | 0.90 | 1.09 | 8.74E-01 | 7.77E-01 |
| 6 | rs2535310  | 31053257 | T | 0.50 | 0.49 | G | 1.02 | 0.93 | 1.12 | 6.47E-01 | 6.01E-01 |
| 6 | rs3130955  | 31054511 | A | 0.38 | 0.35 | C | 1.10 | 1.00 | 1.21 | 4.11E-02 | 3.69E-02 |
| 6 | rs2535304  | 31054687 | G | 0.40 | 0.40 | A | 0.99 | 0.90 | 1.09 | 8.39E-01 | 7.46E-01 |
| 6 | rs2535303  | 31055423 | C | 0.49 | 0.48 | T | 1.01 | 0.92 | 1.11 | 8.30E-01 | 7.65E-01 |
| 6 | rs4947296  | 31058178 | C | 0.07 | 0.07 | T | 1.01 | 0.84 | 1.21 | 9.04E-01 | 8.76E-01 |
| 6 | rs3130544  | 31058340 | A | 0.11 | 0.11 | C | 0.97 | 0.84 | 1.13 | 7.12E-01 | 7.81E-01 |
| 6 | rs2517452  | 31060162 | A | 0.49 | 0.48 | G | 1.01 | 0.92 | 1.11 | 8.33E-01 | 7.75E-01 |
| 6 | rs2517450  | 31061439 | G | 0.49 | 0.48 | A | 1.01 | 0.92 | 1.11 | 8.42E-01 | 7.77E-01 |
| 6 | rs2517448  | 31062667 | A | 0.37 | 0.38 | G | 0.94 | 0.86 | 1.03 | 2.04E-01 | 2.44E-01 |
| 6 | rs2535289  | 31063233 | C | 0.50 | 0.49 | T | 1.02 | 0.93 | 1.11 | 6.90E-01 | 6.45E-01 |
| 6 | rs2256962  | 31065620 | T | 0.07 | 0.09 | C | 0.84 | 0.70 | 0.99 | 3.91E-02 | 4.29E-02 |
| 6 | rs2517403  | 31067009 | G | 0.28 | 0.34 | A | 0.78 | 0.71 | 0.86 | 1.28E-06 | 8.02E-07 |
| 6 | rs9263582  | 31070664 | A | 0.12 | 0.08 | G | 1.68 | 1.43 | 1.98 | 2.64E-10 | 2.58E-10 |
| 6 | rs2508011  | 31071058 | G | 0.28 | 0.33 | T | 0.78 | 0.71 | 0.87 | 1.94E-06 | 1.30E-06 |

|   |            |          |   |      |      |   |      |      |      |          |          |
|---|------------|----------|---|------|------|---|------|------|------|----------|----------|
| 6 | rs9263607  | 31072157 | A | 0.16 | 0.10 | G | 1.63 | 1.42 | 1.87 | 2.70E-12 | 3.66E-12 |
| 6 | rs6457327  | 31074030 | A | 0.37 | 0.38 | C | 0.94 | 0.86 | 1.03 | 1.94E-01 | 2.33E-01 |
| 6 | rs2517485  | 31074101 | A | 0.29 | 0.34 | G | 0.78 | 0.71 | 0.86 | 1.21E-06 | 5.77E-07 |
| 6 | rs1064191  | 31075375 | A | 0.49 | 0.48 | G | 1.01 | 0.92 | 1.10 | 8.44E-01 | 7.83E-01 |
| 6 | rs2844635  | 31075481 | C | 0.28 | 0.34 | T | 0.78 | 0.71 | 0.86 | 1.44E-06 | 9.09E-07 |
| 6 | rs9391709  | 31077405 | C | 0.07 | 0.07 | G | 0.98 | 0.82 | 1.17 | 8.11E-01 | 8.41E-01 |
| 6 | rs1265062  | 31078005 | A | 0.28 | 0.34 | G | 0.78 | 0.71 | 0.86 | 1.44E-06 | 8.87E-07 |
| 6 | rs2233984  | 31079264 | A | 0.07 | 0.07 | G | 0.98 | 0.82 | 1.17 | 8.07E-01 | 8.37E-01 |
| 6 | rs4495304  | 31080718 | C | 0.07 | 0.07 | T | 1.01 | 0.84 | 1.20 | 9.60E-01 | 9.37E-01 |
| 6 | rs2233967  | 31080828 | C | 0.21 | 0.17 | G | 1.31 | 1.17 | 1.48 | 4.65E-06 | 5.43E-06 |
| 6 | rs2233965  | 31080899 | C | 0.21 | 0.17 | A | 1.33 | 1.18 | 1.49 | 1.98E-06 | 2.32E-06 |
| 6 | rs2233956  | 31081205 | G | 0.17 | 0.17 | A | 0.97 | 0.86 | 1.10 | 6.37E-01 | 6.80E-01 |
| 6 | rs1265048  | 31081409 | G | 0.32 | 0.33 | A | 0.97 | 0.89 | 1.07 | 6.06E-01 | 5.84E-01 |
| 6 | rs3130977  | 31081989 | C | 0.34 | 0.32 | T | 1.11 | 1.01 | 1.22 | 3.41E-02 | 4.16E-02 |
| 6 | rs17190526 | 31082081 | A | 0.16 | 0.10 | G | 1.62 | 1.41 | 1.85 | 3.41E-12 | 3.43E-12 |
| 6 | rs6917517  | 31082361 | T | 0.15 | 0.17 | C | 0.86 | 0.76 | 0.97 | 1.80E-02 | 1.48E-02 |
| 6 | rs3130981  | 31083813 | T | 0.23 | 0.27 | C | 0.80 | 0.72 | 0.89 | 4.06E-05 | 4.12E-05 |
| 6 | rs1042127  | 31084170 | G | 0.16 | 0.18 | T | 0.85 | 0.76 | 0.97 | 1.21E-02 | 1.04E-02 |
| 6 | rs1062470  | 31084435 | T | 0.34 | 0.32 | C | 1.07 | 0.97 | 1.18 | 1.84E-01 | 1.81E-01 |
| 6 | rs3094212  | 31085770 | C | 0.50 | 0.50 | T | 1.03 | 0.94 | 1.13 | 4.77E-01 | 4.71E-01 |
| 6 | rs3130989  | 31086377 | G | 0.44 | 0.41 | C | 1.12 | 1.02 | 1.23 | 1.57E-02 | 1.60E-02 |
| 6 | rs3094211  | 31086402 | C | 0.23 | 0.27 | T | 0.80 | 0.72 | 0.89 | 4.73E-05 | 4.80E-05 |
| 6 | rs3095320  | 31087934 | C | 0.23 | 0.27 | T | 0.80 | 0.72 | 0.89 | 4.35E-05 | 4.36E-05 |
| 6 | rs3095317  | 31088671 | C | 0.44 | 0.41 | T | 1.12 | 1.02 | 1.22 | 1.92E-02 | 1.97E-02 |
| 6 | rs3095314  | 31089631 | A | 0.44 | 0.41 | G | 1.12 | 1.02 | 1.22 | 1.96E-02 | 2.00E-02 |
| 6 | rs3094205  | 31091862 | C | 0.34 | 0.32 | T | 1.07 | 0.97 | 1.18 | 1.86E-01 | 1.84E-01 |
| 6 | rs3094204  | 31091992 | T | 0.43 | 0.48 | C | 0.82 | 0.75 | 0.90 | 3.06E-05 | 3.71E-05 |
| 6 | rs3778638  | 31092124 | A | 0.23 | 0.20 | G | 1.21 | 1.08 | 1.35 | 8.21E-04 | 1.02E-03 |
| 6 | rs3131003  | 31093482 | A | 0.41 | 0.42 | G | 0.96 | 0.88 | 1.06 | 4.47E-01 | 4.16E-01 |
| 6 | rs3815087  | 31093587 | T | 0.20 | 0.20 | C | 0.97 | 0.86 | 1.09 | 6.03E-01 | 5.25E-01 |
| 6 | rs6931921  | 31095003 | C | 0.11 | 0.10 | G | 1.20 | 1.04 | 1.39 | 1.49E-02 | 1.90E-02 |
| 6 | rs9263715  | 31095801 | A | 0.20 | 0.20 | G | 0.96 | 0.86 | 1.08 | 5.39E-01 | 4.58E-01 |
| 6 | rs3909109  | 31096367 | C | 0.19 | 0.20 | T | 0.91 | 0.81 | 1.02 | 1.15E-01 | 9.93E-02 |
| 6 | rs3130559  | 31097301 | T | 0.21 | 0.22 | C | 0.99 | 0.89 | 1.11 | 8.65E-01 | 8.73E-01 |

|   |            |          |   |      |      |   |      |      |      |          |          |
|---|------------|----------|---|------|------|---|------|------|------|----------|----------|
| 6 | rs3131009  | 31098832 | G | 0.25 | 0.29 | A | 0.81 | 0.73 | 0.90 | 8.17E-05 | 8.32E-05 |
| 6 | rs4959053  | 31099577 | A | 0.06 | 0.07 | G | 0.95 | 0.79 | 1.15 | 6.00E-01 | 6.26E-01 |
| 6 | rs3823418  | 31100942 | A | 0.18 | 0.17 | G | 1.12 | 0.99 | 1.26 | 7.66E-02 | 8.66E-02 |
| 6 | rs3130564  | 31101674 | T | 0.24 | 0.20 | C | 1.25 | 1.12 | 1.39 | 5.38E-05 | 3.08E-05 |
| 6 | rs28732100 | 31104593 | T | 0.05 | 0.05 | C | 1.06 | 0.86 | 1.31 | 5.96E-01 | 6.19E-01 |
| 6 | rs1265099  | 31105413 | C | 0.39 | 0.40 | T | 0.98 | 0.90 | 1.08 | 7.10E-01 | 6.99E-01 |
| 6 | rs2074478  | 31105633 | G | 0.17 | 0.18 | A | 0.93 | 0.82 | 1.05 | 2.12E-01 | 2.47E-01 |
| 6 | rs2233952  | 31105891 | T | 0.10 | 0.11 | C | 0.90 | 0.78 | 1.05 | 1.74E-01 | 1.97E-01 |
| 6 | rs1265098  | 31106177 | G | 0.23 | 0.24 | A | 0.91 | 0.82 | 1.02 | 9.87E-02 | 1.01E-01 |
| 6 | rs3130573  | 31106268 | G | 0.33 | 0.34 | A | 0.98 | 0.89 | 1.08 | 6.81E-01 | 6.19E-01 |
| 6 | rs9263726  | 31106499 | A | 0.16 | 0.13 | G | 1.25 | 1.10 | 1.42 | 8.23E-04 | 7.28E-04 |
| 6 | rs3094663  | 31107087 | A | 0.28 | 0.31 | G | 0.88 | 0.79 | 0.97 | 1.11E-02 | 1.15E-02 |
| 6 | rs1265093  | 31107187 | T | 0.31 | 0.27 | C | 1.19 | 1.07 | 1.31 | 8.87E-04 | 5.04E-04 |
| 6 | rs1966     | 31107733 | A | 0.19 | 0.19 | G | 0.96 | 0.85 | 1.08 | 4.98E-01 | 5.70E-01 |
| 6 | rs9263733  | 31108829 | T | 0.02 | 0.02 | C | 0.91 | 0.67 | 1.24 | 5.58E-01 | 5.44E-01 |
| 6 | rs1265086  | 31109882 | C | 0.46 | 0.50 | A | 0.88 | 0.80 | 0.96 | 5.09E-03 | 6.86E-03 |
| 6 | rs12364    | 31110786 | T | 0.21 | 0.17 | A | 1.25 | 1.11 | 1.40 | 1.27E-04 | 1.36E-04 |
| 6 | rs1265083  | 31111347 | A | 0.01 | 0.02 | C | 0.71 | 0.49 | 1.02 | 6.35E-02 | 5.20E-02 |
| 6 | rs9263739  | 31111356 | T | 0.21 | 0.17 | C | 1.27 | 1.13 | 1.42 | 5.82E-05 | 6.09E-05 |
| 6 | rs9263740  | 31111400 | C | 0.24 | 0.20 | T | 1.29 | 1.16 | 1.44 | 4.57E-06 | 4.55E-06 |
| 6 | rs11967883 | 31112354 | T | 0.03 | 0.02 | C | 1.33 | 1.02 | 1.75 | 3.56E-02 | 3.17E-02 |
| 6 | rs130072   | 31112484 | A | 0.05 | 0.08 | G | 0.67 | 0.55 | 0.81 | 4.45E-05 | 1.93E-05 |
| 6 | rs1265074  | 31113214 | T | 0.19 | 0.19 | G | 0.96 | 0.86 | 1.09 | 5.49E-01 | 6.37E-01 |
| 6 | rs17196989 | 31113703 | G | 0.01 | 0.01 | A | 0.82 | 0.52 | 1.29 | 3.89E-01 | 4.58E-01 |
| 6 | rs3132538  | 31113842 | T | 0.19 | 0.21 | C | 0.87 | 0.77 | 0.97 | 1.50E-02 | 1.81E-02 |
| 6 | rs746647   | 31114182 | C | 0.29 | 0.30 | T | 0.95 | 0.86 | 1.05 | 3.15E-01 | 2.64E-01 |
| 6 | rs9263749  | 31114515 | A | 0.21 | 0.17 | G | 1.27 | 1.13 | 1.43 | 4.95E-05 | 5.26E-05 |
| 6 | rs2240064  | 31114573 | C | 0.48 | 0.48 | T | 1.04 | 0.95 | 1.14 | 4.22E-01 | 4.20E-01 |
| 6 | rs1265067  | 31116142 | T | 0.29 | 0.30 | C | 0.95 | 0.86 | 1.05 | 3.10E-01 | 2.60E-01 |
| 6 | rs1265115  | 31117075 | T | 0.32 | 0.32 | G | 0.98 | 0.89 | 1.09 | 7.56E-01 | 8.01E-01 |
| 6 | rs1265112  | 31118019 | G | 0.29 | 0.30 | A | 0.95 | 0.86 | 1.05 | 3.23E-01 | 2.70E-01 |
| 6 | rs130067   | 31118511 | C | 0.19 | 0.19 | A | 0.96 | 0.85 | 1.08 | 4.86E-01 | 5.59E-01 |
| 6 | rs130078   | 31118565 | G | 0.24 | 0.26 | C | 0.89 | 0.80 | 0.99 | 3.73E-02 | 3.82E-02 |
| 6 | rs2517985  | 31118942 | G | 0.29 | 0.30 | A | 0.96 | 0.87 | 1.06 | 3.91E-01 | 3.35E-01 |

|   |            |          |   |      |      |   |      |      |      |          |          |
|---|------------|----------|---|------|------|---|------|------|------|----------|----------|
| 6 | rs1265110  | 31119422 | A | 0.12 | 0.12 | G | 0.97 | 0.84 | 1.12 | 6.64E-01 | 7.21E-01 |
| 6 | rs1265109  | 31119589 | A | 0.27 | 0.27 | C | 0.97 | 0.88 | 1.08 | 5.83E-01 | 6.37E-01 |
| 6 | rs2240059  | 31120614 | G | 0.24 | 0.26 | A | 0.87 | 0.79 | 0.97 | 1.29E-02 | 1.26E-02 |
| 6 | rs130077   | 31122330 | T | 0.20 | 0.16 | C | 1.29 | 1.15 | 1.45 | 1.95E-05 | 1.65E-05 |
| 6 | rs9263781  | 31123416 | C | 0.20 | 0.16 | T | 1.29 | 1.15 | 1.45 | 1.93E-05 | 1.65E-05 |
| 6 | rs3130453  | 31124849 | T | 0.47 | 0.48 | C | 0.99 | 0.91 | 1.09 | 8.83E-01 | 9.28E-01 |
| 6 | rs743401   | 31125158 | G | 0.44 | 0.42 | A | 1.08 | 0.98 | 1.18 | 1.17E-01 | 1.10E-01 |
| 6 | rs2239524  | 31125569 | T | 0.44 | 0.42 | G | 1.08 | 0.98 | 1.18 | 1.17E-01 | 1.10E-01 |
| 6 | rs720465   | 31125777 | T | 0.30 | 0.29 | G | 1.06 | 0.96 | 1.17 | 2.85E-01 | 2.68E-01 |
| 6 | rs3130455  | 31125978 | T | 0.23 | 0.21 | A | 1.12 | 1.01 | 1.26 | 4.00E-02 | 3.95E-02 |
| 6 | rs17197101 | 31126409 | T | 0.06 | 0.08 | G | 0.67 | 0.55 | 0.81 | 3.32E-05 | 1.32E-05 |
| 6 | rs3094187  | 31126944 | G | 0.49 | 0.50 | A | 0.97 | 0.89 | 1.07 | 5.73E-01 | 5.26E-01 |
| 6 | rs6905862  | 31127602 | A | 0.43 | 0.42 | G | 1.03 | 0.93 | 1.13 | 6.08E-01 | 5.45E-01 |
| 6 | rs7750641  | 31129310 | T | 0.11 | 0.11 | C | 0.97 | 0.83 | 1.12 | 6.35E-01 | 7.06E-01 |
| 6 | rs2073724  | 31129707 | T | 0.05 | 0.08 | C | 0.67 | 0.56 | 0.82 | 5.32E-05 | 2.27E-05 |
| 6 | rs9263794  | 31130019 | G | 0.20 | 0.16 | A | 1.29 | 1.15 | 1.45 | 1.96E-05 | 1.66E-05 |
| 6 | rs1419881  | 31130593 | T | 0.46 | 0.45 | C | 1.06 | 0.97 | 1.16 | 2.27E-01 | 1.88E-01 |
| 6 | rs1841     | 31130760 | C | 0.06 | 0.07 | T | 0.95 | 0.79 | 1.15 | 5.98E-01 | 6.53E-01 |
| 6 | rs17190776 | 31130865 | A | 0.05 | 0.08 | G | 0.67 | 0.55 | 0.81 | 4.13E-05 | 1.73E-05 |
| 6 | rs3130933  | 31132085 | A | 0.11 | 0.14 | G | 0.80 | 0.69 | 0.92 | 1.39E-03 | 1.95E-03 |
| 6 | rs9263796  | 31132883 | T | 0.20 | 0.16 | C | 1.29 | 1.15 | 1.45 | 2.07E-05 | 1.76E-05 |
| 6 | rs9501063  | 31133894 | C | 0.04 | 0.03 | G | 1.28 | 1.00 | 1.65 | 4.94E-02 | 4.60E-02 |
| 6 | rs3130932  | 31133943 | G | 0.29 | 0.34 | T | 0.81 | 0.73 | 0.90 | 3.90E-05 | 2.47E-05 |
| 6 | rs9263800  | 31134599 | A | 0.20 | 0.16 | G | 1.29 | 1.15 | 1.45 | 1.96E-05 | 1.66E-05 |
| 6 | rs3130931  | 31134888 | A | 0.29 | 0.31 | G | 0.92 | 0.84 | 1.02 | 1.14E-01 | 1.10E-01 |
| 6 | rs9263805  | 31135735 | A | 0.24 | 0.26 | C | 0.89 | 0.81 | 0.99 | 3.86E-02 | 3.95E-02 |
| 6 | rs3130501  | 31136453 | A | 0.24 | 0.26 | G | 0.90 | 0.81 | 1.00 | 4.77E-02 | 4.78E-02 |
| 6 | rs3130503  | 31137165 | A | 0.19 | 0.21 | G | 0.87 | 0.78 | 0.98 | 1.86E-02 | 2.17E-02 |
| 6 | rs879882   | 31139452 | T | 0.35 | 0.37 | C | 0.92 | 0.84 | 1.02 | 9.77E-02 | 9.89E-02 |
| 6 | rs1108746  | 31139504 | A | 0.11 | 0.12 | C | 0.83 | 0.72 | 0.96 | 1.22E-02 | 5.63E-03 |
| 6 | rs1265159  | 31140047 | T | 0.23 | 0.22 | C | 1.06 | 0.95 | 1.18 | 3.24E-01 | 3.10E-01 |
| 6 | rs3132517  | 31141836 | G | 0.19 | 0.21 | A | 0.86 | 0.77 | 0.97 | 1.33E-02 | 1.62E-02 |
| 6 | rs3094188  | 31142245 | G | 0.33 | 0.36 | T | 0.90 | 0.82 | 1.00 | 4.19E-02 | 4.83E-02 |
| 6 | rs1265156  | 31142297 | T | 0.31 | 0.32 | G | 0.96 | 0.87 | 1.06 | 3.71E-01 | 3.82E-01 |

|   |            |          |   |      |      |   |      |      |      |          |          |
|---|------------|----------|---|------|------|---|------|------|------|----------|----------|
| 6 | rs887466   | 31143511 | T | 0.38 | 0.40 | C | 0.92 | 0.84 | 1.01 | 9.39E-02 | 9.13E-02 |
| 6 | rs9501066  | 31145271 | G | 0.37 | 0.38 | A | 0.96 | 0.87 | 1.05 | 3.78E-01 | 3.80E-01 |
| 6 | rs3868542  | 31145839 | G | 0.37 | 0.39 | A | 0.96 | 0.87 | 1.05 | 3.50E-01 | 3.50E-01 |
| 6 | rs887464   | 31145920 | A | 0.41 | 0.43 | G | 0.92 | 0.83 | 1.01 | 6.57E-02 | 8.46E-02 |
| 6 | rs4713438  | 31146846 | A | 0.18 | 0.18 | G | 0.98 | 0.87 | 1.11 | 7.99E-01 | 7.85E-01 |
| 6 | rs9263823  | 31147094 | T | 0.13 | 0.09 | C | 1.62 | 1.40 | 1.87 | 7.06E-11 | 5.05E-11 |
| 6 | rs3130457  | 31147194 | C | 0.23 | 0.22 | T | 1.06 | 0.95 | 1.18 | 3.17E-01 | 3.02E-01 |
| 6 | rs6937752  | 31148606 | T | 0.37 | 0.38 | C | 0.95 | 0.87 | 1.05 | 3.32E-01 | 3.34E-01 |
| 6 | rs9263827  | 31149045 | T | 0.04 | 0.05 | C | 0.86 | 0.68 | 1.08 | 1.89E-01 | 1.90E-01 |
| 6 | rs7760698  | 31150225 | A | 0.05 | 0.05 | T | 0.85 | 0.68 | 1.05 | 1.28E-01 | 1.04E-01 |
| 6 | rs1128175  | 31150435 | T | 0.18 | 0.23 | C | 0.75 | 0.67 | 0.84 | 1.09E-06 | 1.04E-06 |
| 6 | rs9263844  | 31155186 | T | 0.12 | 0.16 | C | 0.76 | 0.66 | 0.87 | 5.13E-05 | 1.52E-05 |
| 6 | rs9263846  | 31155670 | A | 0.12 | 0.16 | G | 0.75 | 0.66 | 0.86 | 3.92E-05 | 1.09E-05 |
| 6 | rs1265181  | 31155785 | G | 0.21 | 0.20 | C | 1.11 | 0.99 | 1.24 | 7.23E-02 | 6.70E-02 |
| 6 | rs9405015  | 31155803 | T | 0.01 | 0.02 | C | 0.76 | 0.53 | 1.10 | 1.42E-01 | 1.48E-01 |
| 6 | rs9295957  | 31157593 | A | 0.17 | 0.19 | G | 0.93 | 0.82 | 1.05 | 2.24E-01 | 2.49E-01 |
| 6 | rs1265180  | 31159345 | T | 0.02 | 0.02 | G | 0.70 | 0.50 | 0.99 | 4.12E-02 | 3.81E-02 |
| 6 | rs9461653  | 31160553 | G | 0.07 | 0.07 | A | 0.95 | 0.79 | 1.14 | 5.99E-01 | 6.54E-01 |
| 6 | rs28362332 | 31162154 | A | 0.08 | 0.10 | G | 0.72 | 0.61 | 0.85 | 9.09E-05 | 3.72E-05 |
| 6 | rs4713446  | 31162839 | T | 0.36 | 0.41 | C | 0.82 | 0.75 | 0.90 | 3.85E-05 | 2.93E-05 |
| 6 | rs4713447  | 31162963 | G | 0.36 | 0.41 | A | 0.82 | 0.74 | 0.90 | 3.62E-05 | 2.69E-05 |
| 6 | rs28362343 | 31165527 | A | 0.08 | 0.10 | G | 0.73 | 0.62 | 0.86 | 1.43E-04 | 5.96E-05 |
| 6 | rs3094609  | 31165566 | A | 0.13 | 0.15 | G | 0.83 | 0.72 | 0.95 | 5.20E-03 | 7.26E-03 |
| 6 | rs9295961  | 31167498 | C | 0.07 | 0.07 | T | 0.96 | 0.80 | 1.15 | 6.60E-01 | 7.01E-01 |
| 6 | rs28397286 | 31167573 | A | 0.18 | 0.18 | G | 0.95 | 0.84 | 1.07 | 3.72E-01 | 4.09E-01 |
| 6 | rs3868075  | 31167815 | C | 0.36 | 0.41 | T | 0.82 | 0.74 | 0.90 | 3.37E-05 | 2.57E-05 |
| 6 | rs4122190  | 31167852 | C | 0.01 | 0.02 | T | 0.76 | 0.53 | 1.10 | 1.42E-01 | 1.48E-01 |
| 6 | rs4122189  | 31167927 | A | 0.22 | 0.24 | G | 0.90 | 0.80 | 1.00 | 5.94E-02 | 6.27E-02 |
| 6 | rs6903896  | 31168029 | A | 0.04 | 0.03 | G | 1.30 | 1.01 | 1.68 | 4.08E-02 | 4.34E-02 |
| 6 | rs10807081 | 31169764 | T | 0.10 | 0.10 | G | 1.03 | 0.88 | 1.21 | 7.01E-01 | 6.77E-01 |
| 6 | rs9263870  | 31170514 | G | 0.08 | 0.10 | A | 0.73 | 0.62 | 0.86 | 1.32E-04 | 5.91E-05 |
| 6 | rs9263871  | 31170528 | G | 0.30 | 0.35 | A | 0.82 | 0.75 | 0.91 | 1.30E-04 | 8.77E-05 |
| 6 | rs9263873  | 31170713 | C | 0.36 | 0.41 | T | 0.82 | 0.75 | 0.90 | 4.54E-05 | 3.59E-05 |
| 6 | rs3132510  | 31172151 | G | 0.10 | 0.10 | A | 0.94 | 0.80 | 1.09 | 4.02E-01 | 4.73E-01 |

|   |            |          |   |      |      |   |      |      |      |          |          |
|---|------------|----------|---|------|------|---|------|------|------|----------|----------|
| 6 | rs4446605  | 31173096 | G | 0.08 | 0.10 | A | 0.73 | 0.62 | 0.86 | 1.35E-04 | 6.16E-05 |
| 6 | rs2894181  | 31174527 | G | 0.48 | 0.48 | A | 1.02 | 0.93 | 1.12 | 7.10E-01 | 7.45E-01 |
| 6 | rs9263911  | 31175667 | G | 0.44 | 0.42 | A | 1.06 | 0.97 | 1.16 | 2.12E-01 | 2.19E-01 |
| 6 | rs4351302  | 31176921 | A | 0.24 | 0.20 | G | 1.22 | 1.10 | 1.37 | 2.82E-04 | 2.63E-04 |
| 6 | rs9263916  | 31176928 | C | 0.08 | 0.10 | T | 0.73 | 0.62 | 0.86 | 1.90E-04 | 8.88E-05 |
| 6 | rs35718543 | 31177845 | A | 0.10 | 0.10 | G | 1.04 | 0.89 | 1.21 | 6.28E-01 | 7.06E-01 |
| 6 | rs34282959 | 31180531 | C | 0.26 | 0.27 | G | 0.99 | 0.90 | 1.10 | 9.19E-01 | 9.08E-01 |
| 6 | rs9263948  | 31181025 | T | 0.08 | 0.10 | C | 0.73 | 0.62 | 0.86 | 1.51E-04 | 6.74E-05 |
| 6 | rs9468898  | 31182383 | G | 0.04 | 0.03 | A | 1.30 | 1.01 | 1.68 | 4.10E-02 | 4.07E-02 |
| 6 | rs28360990 | 31182479 | A | 0.18 | 0.14 | T | 1.35 | 1.19 | 1.53 | 2.51E-06 | 3.22E-06 |
| 6 | rs11757688 | 31182536 | G | 0.26 | 0.27 | A | 1.00 | 0.90 | 1.11 | 9.34E-01 | 9.21E-01 |
| 6 | rs9295967  | 31184020 | G | 0.24 | 0.20 | A | 1.22 | 1.10 | 1.36 | 3.28E-04 | 3.12E-04 |
| 6 | rs3869109  | 31184196 | T | 0.42 | 0.43 | C | 0.97 | 0.88 | 1.06 | 4.99E-01 | 5.72E-01 |
| 6 | rs9501522  | 31184425 | A | 0.06 | 0.07 | G | 0.93 | 0.77 | 1.13 | 4.57E-01 | 5.16E-01 |
| 6 | rs3130467  | 31187075 | T | 0.30 | 0.28 | C | 1.09 | 0.98 | 1.21 | 1.03E-01 | 9.56E-02 |
| 6 | rs10456394 | 31188200 | C | 0.18 | 0.15 | T | 1.30 | 1.15 | 1.47 | 2.91E-05 | 3.36E-05 |
| 6 | rs28360997 | 31188654 | A | 0.21 | 0.17 | G | 1.31 | 1.17 | 1.46 | 4.44E-06 | 6.11E-06 |
| 6 | rs9263985  | 31190538 | A | 0.36 | 0.35 | G | 1.08 | 0.98 | 1.19 | 1.02E-01 | 1.27E-01 |
| 6 | rs4373355  | 31193155 | C | 0.37 | 0.35 | T | 1.08 | 0.98 | 1.19 | 1.29E-01 | 1.55E-01 |
| 6 | rs6928399  | 31195218 | T | 0.29 | 0.34 | C | 0.82 | 0.74 | 0.90 | 7.46E-05 | 7.03E-05 |
| 6 | rs28397289 | 31197407 | T | 0.19 | 0.20 | C | 0.94 | 0.83 | 1.05 | 2.66E-01 | 2.79E-01 |
| 6 | rs3130473  | 31199208 | T | 0.27 | 0.26 | C | 1.06 | 0.95 | 1.17 | 3.18E-01 | 3.11E-01 |
| 6 | rs3130528  | 31199460 | T | 0.12 | 0.15 | C | 0.83 | 0.72 | 0.94 | 4.91E-03 | 6.67E-03 |
| 6 | rs7745906  | 31204008 | A | 0.17 | 0.17 | G | 0.97 | 0.86 | 1.10 | 6.47E-01 | 6.83E-01 |
| 6 | rs3130685  | 31206206 | T | 0.41 | 0.44 | C | 0.90 | 0.82 | 0.99 | 3.37E-02 | 2.73E-02 |
| 6 | rs3130531  | 31206616 | A | 0.39 | 0.39 | G | 1.00 | 0.91 | 1.09 | 9.50E-01 | 9.89E-01 |
| 6 | rs3095250  | 31208340 | G | 0.37 | 0.40 | A | 0.86 | 0.79 | 0.95 | 2.68E-03 | 2.82E-03 |
| 6 | rs3130532  | 31208453 | A | 0.12 | 0.15 | G | 0.82 | 0.72 | 0.94 | 4.28E-03 | 5.92E-03 |
| 6 | rs3130534  | 31209045 | G | 0.39 | 0.42 | A | 0.88 | 0.80 | 0.97 | 8.79E-03 | 8.55E-03 |
| 6 | rs3130712  | 31209510 | C | 0.37 | 0.41 | T | 0.86 | 0.78 | 0.94 | 1.58E-03 | 1.49E-03 |
| 6 | rs3130688  | 31210216 | C | 0.36 | 0.40 | T | 0.86 | 0.78 | 0.94 | 1.69E-03 | 1.82E-03 |
| 6 | rs6901869  | 31210265 | A | 0.17 | 0.13 | G | 1.31 | 1.16 | 1.49 | 2.51E-05 | 2.76E-05 |
| 6 | rs9468907  | 31215097 | T | 0.01 | 0.01 | G | 1.28 | 0.84 | 1.96 | 2.50E-01 | 2.74E-01 |
| 6 | rs3095241  | 31215635 | T | 0.36 | 0.40 | G | 0.85 | 0.77 | 0.93 | 5.91E-04 | 5.83E-04 |

|   |            |          |   |      |      |   |      |      |      |          |          |
|---|------------|----------|---|------|------|---|------|------|------|----------|----------|
| 6 | rs9357117  | 31217504 | G | 0.01 | 0.02 | A | 0.67 | 0.45 | 0.99 | 4.51E-02 | 4.61E-02 |
| 6 | rs3130424  | 31218239 | C | 0.25 | 0.24 | A | 1.06 | 0.95 | 1.17 | 3.18E-01 | 3.02E-01 |
| 6 | rs4084090  | 31218835 | C | 0.08 | 0.06 | T | 1.17 | 0.98 | 1.39 | 8.87E-02 | 8.99E-02 |
| 6 | rs4084262  | 31218889 | A | 0.11 | 0.13 | G | 0.83 | 0.72 | 0.96 | 1.29E-02 | 1.15E-02 |
| 6 | rs3130427  | 31218984 | A | 0.40 | 0.43 | G | 0.87 | 0.80 | 0.96 | 4.85E-03 | 4.30E-03 |
| 6 | rs9264179  | 31219869 | T | 0.39 | 0.42 | C | 0.88 | 0.80 | 0.97 | 7.66E-03 | 6.53E-03 |
| 6 | rs4416711  | 31221039 | T | 0.08 | 0.06 | C | 1.18 | 0.99 | 1.41 | 5.68E-02 | 5.90E-02 |
| 6 | rs17191559 | 31221485 | C | 0.07 | 0.08 | A | 0.90 | 0.75 | 1.07 | 2.21E-01 | 2.68E-01 |
| 6 | rs9264219  | 31221914 | C | 0.28 | 0.33 | T | 0.80 | 0.73 | 0.89 | 1.49E-05 | 1.38E-05 |
| 6 | rs1986997  | 31228410 | T | 0.36 | 0.36 | C | 1.01 | 0.91 | 1.10 | 9.25E-01 | 8.38E-01 |
| 6 | rs2394950  | 31230701 | A | 0.05 | 0.04 | G | 1.15 | 0.92 | 1.44 | 2.11E-01 | 2.36E-01 |
| 6 | rs3130542  | 31232111 | A | 0.19 | 0.21 | G | 0.90 | 0.80 | 1.01 | 6.92E-02 | 8.68E-02 |
| 6 | rs2844623  | 31232543 | A | 0.23 | 0.18 | G | 1.35 | 1.20 | 1.51 | 3.35E-07 | 4.53E-07 |
| 6 | rs2248902  | 31234114 | A | 0.27 | 0.25 | G | 1.12 | 1.01 | 1.24 | 3.81E-02 | 3.96E-02 |
| 6 | rs9264532  | 31234381 | C | 0.31 | 0.32 | T | 0.93 | 0.84 | 1.02 | 1.34E-01 | 1.63E-01 |
| 6 | rs2524099  | 31236051 | C | 0.48 | 0.49 | T | 0.95 | 0.87 | 1.04 | 2.83E-01 | 2.96E-01 |
| 6 | rs9394047  | 31236250 | C | 0.07 | 0.07 | A | 0.88 | 0.73 | 1.06 | 1.63E-01 | 1.52E-01 |
| 6 | rs34131062 | 31236410 | T | 0.14 | 0.13 | C | 1.04 | 0.91 | 1.18 | 6.13E-01 | 6.10E-01 |
| 6 | rs9264602  | 31237406 | C | 0.30 | 0.32 | T | 0.92 | 0.83 | 1.02 | 1.02E-01 | 1.39E-01 |
| 6 | rs2074488  | 31240431 | A | 0.14 | 0.13 | C | 1.03 | 0.90 | 1.17 | 7.17E-01 | 7.14E-01 |
| 6 | rs2395471  | 31240692 | A | 0.38 | 0.41 | G | 0.88 | 0.80 | 0.97 | 9.08E-03 | 5.09E-03 |
| 6 | rs7759127  | 31240988 | G | 0.17 | 0.13 | T | 1.38 | 1.22 | 1.57 | 5.16E-07 | 4.53E-07 |
| 6 | rs5010528  | 31241032 | G | 0.07 | 0.10 | A | 0.64 | 0.53 | 0.76 | 2.24E-07 | 8.11E-08 |
| 6 | rs9461680  | 31243347 | T | 0.19 | 0.18 | C | 1.05 | 0.93 | 1.18 | 4.28E-01 | 4.01E-01 |
| 6 | rs3130696  | 31243884 | A | 0.23 | 0.24 | G | 0.94 | 0.85 | 1.05 | 2.96E-01 | 3.38E-01 |
| 6 | rs2524073  | 31244235 | T | 0.17 | 0.13 | C | 1.38 | 1.22 | 1.57 | 3.90E-07 | 3.35E-07 |
| 6 | rs2524068  | 31245061 | A | 0.23 | 0.18 | C | 1.36 | 1.22 | 1.53 | 1.21E-07 | 1.23E-07 |
| 6 | rs9391714  | 31245080 | A | 0.02 | 0.03 | G | 0.69 | 0.51 | 0.92 | 1.16E-02 | 1.27E-02 |
| 6 | rs6906846  | 31245736 | A | 0.25 | 0.30 | G | 0.76 | 0.69 | 0.85 | 2.67E-07 | 1.88E-07 |
| 6 | rs7382297  | 31247067 | T | 0.12 | 0.15 | G | 0.82 | 0.72 | 0.94 | 4.38E-03 | 5.97E-03 |
| 6 | rs17198616 | 31247964 | C | 0.13 | 0.13 | T | 1.03 | 0.90 | 1.18 | 6.82E-01 | 6.78E-01 |
| 6 | rs9468914  | 31250606 | C | 0.30 | 0.34 | A | 0.83 | 0.76 | 0.92 | 3.29E-04 | 2.57E-04 |
| 6 | rs2394963  | 31251462 | T | 0.26 | 0.30 | C | 0.84 | 0.75 | 0.93 | 7.64E-04 | 4.83E-04 |
| 6 | rs9348862  | 31252747 | C | 0.07 | 0.08 | T | 0.94 | 0.79 | 1.12 | 4.89E-01 | 4.86E-01 |



|   |            |          |   |      |      |   |      |      |      |          |          |
|---|------------|----------|---|------|------|---|------|------|------|----------|----------|
| 6 | rs9461684  | 31253444 | T | 0.07 | 0.10 | C | 0.63 | 0.53 | 0.74 | 8.40E-08 | 2.89E-08 |
| 6 | rs2853933  | 31254088 | A | 0.40 | 0.41 | G | 0.98 | 0.89 | 1.08 | 6.89E-01 | 7.35E-01 |
| 6 | rs9468920  | 31254936 | A | 0.26 | 0.30 | G | 0.82 | 0.74 | 0.91 | 2.58E-04 | 1.62E-04 |
| 6 | rs2853930  | 31255424 | G | 0.17 | 0.13 | T | 1.38 | 1.22 | 1.57 | 4.97E-07 | 4.31E-07 |
| 6 | rs2524050  | 31255541 | G | 0.17 | 0.13 | A | 1.38 | 1.22 | 1.57 | 5.15E-07 | 4.47E-07 |
| 6 | rs2524044  | 31256753 | C | 0.22 | 0.17 | A | 1.30 | 1.16 | 1.46 | 5.14E-06 | 3.56E-06 |
| 6 | rs9468924  | 31256948 | A | 0.01 | 0.01 | G | 1.41 | 0.92 | 2.14 | 1.10E-01 | 1.20E-01 |
| 6 | rs3900938  | 31257622 | G | 0.21 | 0.24 | A | 0.83 | 0.74 | 0.93 | 9.97E-04 | 5.67E-04 |
| 6 | rs28367594 | 31258141 | A | 0.03 | 0.04 | G | 0.82 | 0.64 | 1.05 | 1.10E-01 | 1.37E-01 |
| 6 | rs9468925  | 31258837 | A | 0.33 | 0.37 | G | 0.86 | 0.78 | 0.95 | 2.18E-03 | 1.52E-03 |
| 6 | rs9468926  | 31260218 | T | 0.31 | 0.34 | C | 0.86 | 0.78 | 0.95 | 2.37E-03 | 1.51E-03 |
| 6 | rs9357122  | 31260345 | C | 0.07 | 0.08 | T | 0.94 | 0.79 | 1.12 | 4.83E-01 | 4.82E-01 |
| 6 | rs16899178 | 31261137 | T | 0.04 | 0.04 | C | 1.01 | 0.80 | 1.27 | 9.31E-01 | 8.31E-01 |
| 6 | rs2243868  | 31261276 | A | 0.40 | 0.40 | G | 0.98 | 0.90 | 1.08 | 7.51E-01 | 7.94E-01 |
| 6 | rs3873379  | 31262169 | G | 0.26 | 0.30 | A | 0.82 | 0.74 | 0.91 | 1.98E-04 | 1.24E-04 |
| 6 | rs3873380  | 31262438 | A | 0.26 | 0.31 | G | 0.80 | 0.72 | 0.89 | 3.19E-05 | 2.20E-05 |
| 6 | rs9348863  | 31262461 | C | 0.07 | 0.08 | T | 0.97 | 0.81 | 1.15 | 6.88E-01 | 6.87E-01 |
| 6 | rs3873381  | 31263231 | G | 0.07 | 0.08 | T | 0.94 | 0.79 | 1.12 | 4.83E-01 | 4.81E-01 |
| 6 | rs3094682  | 31264461 | T | 0.16 | 0.18 | G | 0.87 | 0.77 | 0.98 | 2.10E-02 | 2.41E-02 |
| 6 | rs9468932  | 31264823 | A | 0.20 | 0.17 | G | 1.16 | 1.03 | 1.30 | 1.70E-02 | 1.84E-02 |
| 6 | rs2524132  | 31264912 | T | 0.17 | 0.13 | C | 1.38 | 1.22 | 1.57 | 4.97E-07 | 4.31E-07 |
| 6 | rs2853924  | 31265146 | A | 0.17 | 0.13 | T | 1.38 | 1.22 | 1.57 | 5.15E-07 | 4.53E-07 |
| 6 | rs2246954  | 31265262 | A | 0.44 | 0.45 | G | 0.98 | 0.90 | 1.08 | 7.40E-01 | 8.22E-01 |
| 6 | rs2524123  | 31265314 | G | 0.41 | 0.34 | A | 1.32 | 1.20 | 1.45 | 4.90E-09 | 5.46E-09 |
| 6 | rs2247056  | 31265490 | T | 0.23 | 0.25 | C | 0.86 | 0.77 | 0.96 | 6.78E-03 | 9.98E-03 |
| 6 | rs17192463 | 31265565 | T | 0.02 | 0.02 | C | 0.95 | 0.70 | 1.30 | 7.51E-01 | 7.87E-01 |
| 6 | rs2853923  | 31265737 | C | 0.45 | 0.45 | T | 1.02 | 0.93 | 1.11 | 6.71E-01 | 7.25E-01 |
| 6 | rs2524089  | 31266522 | C | 0.40 | 0.41 | A | 0.98 | 0.89 | 1.07 | 6.01E-01 | 6.42E-01 |
| 6 | rs28367646 | 31268332 | C | 0.27 | 0.30 | A | 0.83 | 0.75 | 0.92 | 3.69E-04 | 2.28E-04 |
| 6 | rs9366778  | 31269173 | A | 0.36 | 0.40 | G | 0.86 | 0.78 | 0.94 | 1.58E-03 | 1.19E-03 |
| 6 | rs3873385  | 31269308 | A | 0.20 | 0.16 | G | 1.30 | 1.16 | 1.47 | 1.07E-05 | 9.82E-06 |
| 6 | rs3915971  | 31269348 | C | 0.29 | 0.25 | T | 1.26 | 1.13 | 1.39 | 1.71E-05 | 1.69E-05 |
| 6 | rs7750269  | 31271157 | G | 0.09 | 0.08 | A | 1.09 | 0.93 | 1.27 | 3.11E-01 | 2.99E-01 |
| 6 | rs9264868  | 31271601 | G | 0.17 | 0.13 | A | 1.36 | 1.20 | 1.54 | 1.67E-06 | 1.51E-06 |

|   |            |          |   |      |      |   |      |      |      |          |          |
|---|------------|----------|---|------|------|---|------|------|------|----------|----------|
| 6 | rs9264869  | 31271630 | G | 0.18 | 0.13 | A | 1.40 | 1.23 | 1.59 | 1.67E-07 | 1.44E-07 |
| 6 | rs9264870  | 31271662 | A | 0.18 | 0.13 | G | 1.40 | 1.23 | 1.59 | 1.67E-07 | 1.44E-07 |
| 6 | rs9461688  | 31271716 | G | 0.25 | 0.29 | A | 0.80 | 0.72 | 0.89 | 4.82E-05 | 2.91E-05 |
| 6 | rs9368675  | 31272157 | A | 0.09 | 0.08 | G | 1.09 | 0.93 | 1.27 | 3.11E-01 | 2.99E-01 |
| 6 | rs6457374  | 31272261 | C | 0.22 | 0.25 | T | 0.85 | 0.76 | 0.95 | 2.85E-03 | 4.37E-03 |
| 6 | rs9368677  | 31272321 | A | 0.08 | 0.07 | G | 1.05 | 0.88 | 1.25 | 5.91E-01 | 5.52E-01 |
| 6 | rs9264904  | 31272553 | A | 0.29 | 0.27 | G | 1.06 | 0.96 | 1.17 | 2.45E-01 | 2.80E-01 |
| 6 | rs9264916  | 31272774 | A | 0.25 | 0.20 | G | 1.30 | 1.16 | 1.44 | 1.96E-06 | 1.59E-06 |
| 6 | rs7760988  | 31273030 | T | 0.09 | 0.08 | C | 1.11 | 0.95 | 1.30 | 2.02E-01 | 1.93E-01 |
| 6 | rs7761965  | 31273495 | A | 0.11 | 0.11 | G | 1.07 | 0.92 | 1.24 | 3.64E-01 | 3.42E-01 |
| 6 | rs3873386  | 31273745 | G | 0.33 | 0.38 | A | 0.83 | 0.75 | 0.91 | 9.39E-05 | 6.57E-05 |
| 6 | rs6930944  | 31274036 | G | 0.09 | 0.08 | A | 1.09 | 0.93 | 1.27 | 3.11E-01 | 2.99E-01 |
| 6 | rs9264942  | 31274380 | C | 0.43 | 0.37 | T | 1.30 | 1.18 | 1.43 | 5.13E-08 | 8.83E-08 |
| 6 | rs10484554 | 31274555 | T | 0.16 | 0.14 | C | 1.16 | 1.02 | 1.31 | 2.77E-02 | 3.36E-02 |
| 6 | rs396243   | 31275174 | G | 0.26 | 0.21 | A | 1.32 | 1.18 | 1.46 | 5.39E-07 | 4.96E-07 |
| 6 | rs9378199  | 31301658 | C | 0.08 | 0.07 | T | 1.08 | 0.90 | 1.28 | 4.14E-01 | 3.83E-01 |
| 6 | rs9265882  | 31313101 | C | 0.41 | 0.35 | T | 1.28 | 1.17 | 1.41 | 2.48E-07 | 3.03E-07 |
| 6 | rs7453967  | 31314243 | G | 0.13 | 0.16 | T | 0.79 | 0.69 | 0.90 | 4.38E-04 | 6.60E-04 |
| 6 | rs2246010  | 31317024 | C | 0.05 | 0.06 | A | 0.92 | 0.75 | 1.13 | 4.31E-01 | 4.23E-01 |
| 6 | rs9266018  | 31317223 | A | 0.12 | 0.09 | T | 1.54 | 1.32 | 1.79 | 5.24E-08 | 4.94E-08 |
| 6 | rs2156875  | 31317347 | G | 0.48 | 0.49 | A | 0.95 | 0.86 | 1.04 | 2.27E-01 | 2.30E-01 |
| 6 | rs2523619  | 31318144 | G | 0.22 | 0.21 | A | 1.09 | 0.97 | 1.22 | 1.43E-01 | 1.57E-01 |
| 6 | rs2442719  | 31320538 | G | 0.39 | 0.44 | A | 0.81 | 0.74 | 0.89 | 1.25E-05 | 1.01E-05 |
| 6 | rs2596503  | 31320810 | T | 0.17 | 0.19 | C | 0.88 | 0.78 | 0.99 | 3.20E-02 | 4.30E-02 |
| 6 | rs2523612  | 31321123 | C | 0.12 | 0.14 | A | 0.81 | 0.71 | 0.93 | 2.18E-03 | 2.82E-03 |
| 6 | rs2596501  | 31321211 | G | 0.48 | 0.49 | A | 0.96 | 0.88 | 1.05 | 4.16E-01 | 4.19E-01 |
| 6 | rs1058026  | 31321685 | G | 0.13 | 0.16 | T | 0.76 | 0.67 | 0.87 | 8.17E-05 | 3.25E-05 |
| 6 | rs2523608  | 31322559 | C | 0.41 | 0.41 | T | 1.03 | 0.93 | 1.13 | 5.95E-01 | 5.82E-01 |
| 6 | rs2596487  | 31325056 | A | 0.18 | 0.18 | G | 1.01 | 0.89 | 1.14 | 9.35E-01 | 9.31E-01 |
| 6 | rs2523591  | 31326960 | T | 0.42 | 0.43 | C | 0.97 | 0.89 | 1.07 | 5.76E-01 | 5.42E-01 |
| 6 | rs2523580  | 31328245 | C | 0.36 | 0.34 | T | 1.09 | 0.99 | 1.21 | 7.09E-02 | 6.24E-02 |
| 6 | rs2596549  | 31331166 | A | 0.17 | 0.17 | G | 0.96 | 0.85 | 1.09 | 5.35E-01 | 6.12E-01 |
| 6 | rs2523554  | 31331829 | G | 0.37 | 0.37 | A | 1.00 | 0.91 | 1.10 | 9.80E-01 | 8.25E-01 |
| 6 | rs2596551  | 31332239 | C | 0.22 | 0.19 | A | 1.20 | 1.07 | 1.35 | 1.69E-03 | 1.29E-03 |

|   |            |          |   |      |      |   |      |      |      |          |          |
|---|------------|----------|---|------|------|---|------|------|------|----------|----------|
| 6 | rs2844575  | 31334945 | G | 0.51 | 0.47 | A | 1.15 | 1.05 | 1.26 | 2.53E-03 | 2.17E-03 |
| 6 | rs2844573  | 31335454 | G | 0.34 | 0.30 | T | 1.21 | 1.10 | 1.34 | 1.18E-04 | 5.57E-05 |
| 6 | rs9266395  | 31335566 | T | 0.20 | 0.20 | C | 1.01 | 0.90 | 1.13 | 9.01E-01 | 9.80E-01 |
| 6 | rs9266399  | 31335806 | T | 0.20 | 0.20 | A | 1.00 | 0.89 | 1.13 | 9.60E-01 | 9.63E-01 |
| 6 | rs2523535  | 31336250 | C | 0.42 | 0.39 | T | 1.16 | 1.06 | 1.27 | 1.96E-03 | 1.02E-03 |
| 6 | rs9266409  | 31336568 | C | 0.20 | 0.20 | T | 1.00 | 0.89 | 1.13 | 9.54E-01 | 9.69E-01 |
| 6 | rs2253907  | 31336870 | G | 0.45 | 0.50 | A | 0.82 | 0.75 | 0.90 | 1.57E-05 | 1.10E-05 |
| 6 | rs9266433  | 31337633 | T | 0.15 | 0.10 | C | 1.49 | 1.30 | 1.71 | 1.43E-08 | 9.05E-09 |
| 6 | rs9295986  | 31338528 | T | 0.23 | 0.25 | C | 0.93 | 0.83 | 1.03 | 1.57E-01 | 9.06E-02 |
| 6 | rs2523522  | 31340328 | A | 0.36 | 0.38 | G | 0.90 | 0.82 | 0.98 | 2.15E-02 | 1.75E-02 |
| 6 | rs2394990  | 31340559 | C | 0.35 | 0.38 | A | 0.89 | 0.81 | 0.98 | 1.88E-02 | 1.51E-02 |
| 6 | rs7770216  | 31340611 | T | 0.20 | 0.20 | G | 0.99 | 0.88 | 1.10 | 8.00E-01 | 7.23E-01 |
| 6 | rs9266515  | 31341340 | C | 0.02 | 0.02 | A | 0.86 | 0.61 | 1.20 | 3.71E-01 | 3.32E-01 |
| 6 | rs2254556  | 31342631 | A | 0.17 | 0.17 | G | 0.96 | 0.85 | 1.08 | 4.73E-01 | 5.48E-01 |
| 6 | rs13202464 | 31344583 | G | 0.07 | 0.06 | A | 1.04 | 0.86 | 1.26 | 6.73E-01 | 6.44E-01 |
| 6 | rs7382258  | 31345021 | G | 0.36 | 0.39 | A | 0.89 | 0.81 | 0.98 | 1.82E-02 | 1.41E-02 |
| 6 | rs7775117  | 31345486 | A | 0.19 | 0.22 | T | 0.88 | 0.78 | 0.98 | 2.23E-02 | 1.18E-02 |
| 6 | rs9266629  | 31346822 | C | 0.26 | 0.22 | T | 1.25 | 1.12 | 1.39 | 4.36E-05 | 2.76E-05 |
| 6 | rs9501587  | 31346937 | A | 0.16 | 0.20 | G | 0.77 | 0.69 | 0.87 | 3.72E-05 | 1.83E-05 |
| 6 | rs9266638  | 31347057 | T | 0.27 | 0.30 | C | 0.85 | 0.77 | 0.94 | 2.14E-03 | 9.65E-04 |
| 6 | rs4713460  | 31347798 | A | 0.30 | 0.30 | G | 1.01 | 0.91 | 1.11 | 8.57E-01 | 9.33E-01 |
| 6 | rs4713462  | 31347816 | A | 0.29 | 0.29 | G | 1.01 | 0.91 | 1.11 | 9.18E-01 | 9.92E-01 |
| 6 | rs9266689  | 31348580 | A | 0.34 | 0.36 | G | 0.93 | 0.84 | 1.02 | 1.23E-01 | 1.35E-01 |
| 6 | rs9266722  | 31349922 | T | 0.11 | 0.10 | C | 1.06 | 0.91 | 1.23 | 4.69E-01 | 5.61E-01 |
| 6 | rs2442749  | 31352040 | G | 0.29 | 0.28 | A | 1.05 | 0.95 | 1.16 | 3.73E-01 | 3.35E-01 |
| 6 | rs9266773  | 31352348 | C | 0.15 | 0.10 | T | 1.54 | 1.34 | 1.77 | 1.19E-09 | 7.69E-10 |
| 6 | rs28366099 | 31352902 | T | 0.07 | 0.09 | C | 0.83 | 0.70 | 0.98 | 2.80E-02 | 3.30E-02 |
| 6 | rs2844529  | 31353593 | T | 0.29 | 0.34 | C | 0.80 | 0.73 | 0.89 | 1.79E-05 | 5.88E-06 |
| 6 | rs2428486  | 31354104 | G | 0.29 | 0.34 | A | 0.80 | 0.73 | 0.89 | 2.18E-05 | 7.03E-06 |
| 6 | rs6932730  | 31354182 | C | 0.16 | 0.19 | T | 0.85 | 0.75 | 0.96 | 7.22E-03 | 2.78E-03 |
| 6 | rs4711268  | 31354504 | T | 0.22 | 0.25 | C | 0.84 | 0.75 | 0.93 | 1.18E-03 | 4.08E-04 |
| 6 | rs13437082 | 31354560 | T | 0.22 | 0.25 | C | 0.84 | 0.75 | 0.94 | 1.87E-03 | 6.83E-04 |
| 6 | rs4711269  | 31354819 | T | 0.22 | 0.25 | C | 0.84 | 0.75 | 0.94 | 1.54E-03 | 5.67E-04 |
| 6 | rs2596560  | 31355318 | G | 0.22 | 0.21 | A | 1.02 | 0.92 | 1.15 | 6.84E-01 | 7.34E-01 |

|   |            |          |   |      |      |   |      |      |      |          |          |
|---|------------|----------|---|------|------|---|------|------|------|----------|----------|
| 6 | rs2523477  | 31360389 | G | 0.07 | 0.09 | A | 0.81 | 0.68 | 0.96 | 1.62E-02 | 1.87E-02 |
| 6 | rs7751725  | 31360433 | G | 0.22 | 0.25 | A | 0.83 | 0.75 | 0.93 | 1.16E-03 | 3.99E-04 |
| 6 | rs2523476  | 31361424 | A | 0.07 | 0.09 | G | 0.81 | 0.68 | 0.96 | 1.71E-02 | 1.97E-02 |
| 6 | rs2523467  | 31362930 | A | 0.29 | 0.33 | G | 0.79 | 0.72 | 0.88 | 7.95E-06 | 2.53E-06 |
| 6 | rs2251396  | 31364707 | T | 0.35 | 0.29 | C | 1.27 | 1.15 | 1.40 | 2.22E-06 | 1.49E-06 |
| 6 | rs2596542  | 31366595 | A | 0.29 | 0.33 | G | 0.79 | 0.72 | 0.88 | 6.62E-06 | 2.42E-06 |
| 6 | rs2523454  | 31367865 | T | 0.36 | 0.30 | C | 1.32 | 1.19 | 1.45 | 3.53E-08 | 1.63E-08 |
| 6 | rs2523453  | 31368125 | C | 0.29 | 0.34 | G | 0.79 | 0.72 | 0.88 | 5.51E-06 | 1.82E-06 |
| 6 | rs2844521  | 31368964 | A | 0.29 | 0.34 | G | 0.79 | 0.72 | 0.88 | 6.11E-06 | 1.71E-06 |
| 6 | rs2301749  | 31371355 | T | 0.02 | 0.01 | C | 1.16 | 0.79 | 1.70 | 4.58E-01 | 4.25E-01 |
| 6 | rs2263313  | 31373810 | A | 0.07 | 0.09 | G | 0.80 | 0.67 | 0.95 | 1.06E-02 | 1.26E-02 |
| 6 | rs12174396 | 31374579 | G | 0.08 | 0.07 | A | 1.24 | 1.04 | 1.48 | 1.75E-02 | 1.55E-02 |
| 6 | rs12660741 | 31376989 | G | 0.03 | 0.03 | A | 1.01 | 0.75 | 1.34 | 9.74E-01 | 9.61E-01 |
| 6 | rs6910087  | 31377047 | T | 0.10 | 0.12 | C | 0.84 | 0.73 | 0.97 | 1.95E-02 | 7.58E-03 |
| 6 | rs9266804  | 31377642 | G | 0.06 | 0.07 | A | 0.81 | 0.67 | 0.98 | 2.59E-02 | 2.67E-02 |
| 6 | rs1051794  | 31379109 | A | 0.25 | 0.28 | G | 0.84 | 0.76 | 0.94 | 1.56E-03 | 8.37E-04 |
| 6 | rs1131896  | 31379115 | A | 0.25 | 0.26 | G | 0.96 | 0.86 | 1.06 | 4.06E-01 | 3.85E-01 |
| 6 | rs2256028  | 31379198 | T | 0.15 | 0.16 | G | 0.88 | 0.78 | 1.00 | 5.37E-02 | 5.57E-02 |
| 6 | rs2256175  | 31380449 | A | 0.40 | 0.46 | G | 0.80 | 0.73 | 0.88 | 4.68E-06 | 1.03E-06 |
| 6 | rs28642901 | 31381808 | G | 0.22 | 0.25 | A | 0.85 | 0.76 | 0.95 | 3.18E-03 | 1.89E-03 |
| 6 | rs9266825  | 31382882 | A | 0.22 | 0.25 | C | 0.82 | 0.73 | 0.92 | 5.75E-04 | 3.97E-04 |
| 6 | rs1131904  | 31383071 | G | 0.22 | 0.25 | A | 0.85 | 0.76 | 0.95 | 3.32E-03 | 2.07E-03 |
| 6 | rs6932236  | 31383979 | C | 0.22 | 0.25 | T | 0.84 | 0.75 | 0.94 | 1.85E-03 | 1.04E-03 |
| 6 | rs2848713  | 31384479 | A | 0.06 | 0.07 | G | 0.93 | 0.77 | 1.13 | 4.64E-01 | 4.48E-01 |
| 6 | rs9468992  | 31384578 | A | 0.13 | 0.14 | G | 0.86 | 0.75 | 0.99 | 3.28E-02 | 1.92E-02 |
| 6 | rs9266845  | 31384792 | C | 0.22 | 0.25 | T | 0.84 | 0.75 | 0.94 | 1.71E-03 | 1.06E-03 |
| 6 | rs2596530  | 31387373 | G | 0.49 | 0.45 | A | 1.19 | 1.08 | 1.30 | 2.26E-04 | 8.49E-05 |
| 6 | rs2596531  | 31387557 | C | 0.49 | 0.45 | T | 1.19 | 1.08 | 1.30 | 2.33E-04 | 9.00E-05 |
| 6 | rs9501106  | 31388109 | A | 0.12 | 0.14 | G | 0.87 | 0.76 | 1.00 | 4.35E-02 | 2.68E-02 |
| 6 | rs2844513  | 31388214 | T | 0.39 | 0.44 | C | 0.81 | 0.74 | 0.89 | 1.24E-05 | 5.02E-06 |
| 6 | rs2844511  | 31389784 | T | 0.49 | 0.45 | C | 1.18 | 1.08 | 1.30 | 2.64E-04 | 1.01E-04 |
| 6 | rs17200407 | 31389965 | G | 0.01 | 0.02 | C | 0.80 | 0.55 | 1.18 | 2.68E-01 | 1.76E-01 |
| 6 | rs10223568 | 31390203 | C | 0.13 | 0.14 | T | 0.86 | 0.75 | 0.99 | 3.36E-02 | 1.97E-02 |
| 6 | rs2516448  | 31390410 | A | 0.49 | 0.45 | G | 1.19 | 1.08 | 1.30 | 2.21E-04 | 8.35E-05 |

|   |            |          |   |      |      |   |      |      |      |          |          |
|---|------------|----------|---|------|------|---|------|------|------|----------|----------|
| 6 | rs9501109  | 31392118 | G | 0.20 | 0.22 | A | 0.89 | 0.80 | 1.00 | 5.17E-02 | 2.97E-02 |
| 6 | rs2524279  | 31392906 | C | 0.07 | 0.06 | T | 1.10 | 0.91 | 1.33 | 3.22E-01 | 3.25E-01 |
| 6 | rs4947314  | 31393374 | G | 0.15 | 0.18 | T | 0.80 | 0.70 | 0.90 | 4.64E-04 | 1.90E-04 |
| 6 | rs6935045  | 31402410 | A | 0.12 | 0.13 | T | 0.94 | 0.82 | 1.08 | 3.77E-01 | 3.82E-01 |
| 6 | rs9501595  | 31405604 | T | 0.13 | 0.14 | G | 0.87 | 0.76 | 1.00 | 4.90E-02 | 2.86E-02 |
| 6 | rs2524277  | 31407579 | T | 0.04 | 0.06 | C | 0.68 | 0.55 | 0.86 | 1.01E-03 | 1.33E-03 |
| 6 | rs7772549  | 31407643 | C | 0.26 | 0.29 | T | 0.85 | 0.77 | 0.95 | 2.64E-03 | 1.37E-03 |
| 6 | rs9469003  | 31407828 | C | 0.13 | 0.14 | T | 0.86 | 0.75 | 0.99 | 3.36E-02 | 1.97E-02 |
| 6 | rs3094738  | 31407913 | C | 0.06 | 0.08 | T | 0.81 | 0.68 | 0.97 | 2.24E-02 | 2.57E-02 |
| 6 | rs6938674  | 31408004 | C | 0.02 | 0.03 | T | 0.60 | 0.44 | 0.81 | 6.92E-04 | 5.61E-04 |
| 6 | rs9469007  | 31409024 | C | 0.27 | 0.30 | T | 0.85 | 0.77 | 0.94 | 1.90E-03 | 9.71E-04 |
| 6 | rs28575156 | 31409857 | G | 0.13 | 0.14 | A | 0.86 | 0.75 | 0.98 | 2.83E-02 | 1.64E-02 |
| 6 | rs6928810  | 31410524 | T | 0.24 | 0.27 | C | 0.86 | 0.77 | 0.95 | 4.73E-03 | 2.64E-03 |
| 6 | rs3899823  | 31410597 | T | 0.18 | 0.19 | C | 0.91 | 0.80 | 1.02 | 1.03E-01 | 6.86E-02 |
| 6 | rs3869129  | 31410649 | A | 0.18 | 0.19 | G | 0.90 | 0.80 | 1.02 | 1.02E-01 | 6.68E-02 |
| 6 | rs2596464  | 31412961 | A | 0.46 | 0.50 | G | 0.87 | 0.79 | 0.95 | 2.10E-03 | 1.74E-03 |
| 6 | rs9765960  | 31413000 | A | 0.02 | 0.03 | G | 0.60 | 0.45 | 0.81 | 7.67E-04 | 6.52E-04 |
| 6 | rs12206131 | 31414010 | G | 0.04 | 0.02 | A | 1.52 | 1.17 | 1.99 | 1.77E-03 | 1.76E-03 |
| 6 | rs2516464  | 31416156 | T | 0.48 | 0.50 | C | 0.94 | 0.86 | 1.03 | 1.77E-01 | 1.71E-01 |
| 6 | rs2516463  | 31416536 | C | 0.07 | 0.08 | T | 0.84 | 0.70 | 1.00 | 4.88E-02 | 5.94E-02 |
| 6 | rs16899646 | 31416920 | G | 0.11 | 0.12 | C | 0.89 | 0.77 | 1.03 | 1.15E-01 | 6.93E-02 |
| 6 | rs3128982  | 31417191 | G | 0.34 | 0.30 | A | 1.20 | 1.09 | 1.33 | 2.56E-04 | 1.47E-04 |
| 6 | rs9501129  | 31417396 | C | 0.12 | 0.14 | T | 0.84 | 0.73 | 0.97 | 1.40E-02 | 7.22E-03 |
| 6 | rs2596458  | 31417647 | A | 0.07 | 0.08 | G | 0.83 | 0.69 | 0.99 | 4.02E-02 | 4.88E-02 |
| 6 | rs2516458  | 31419387 | A | 0.48 | 0.50 | G | 0.94 | 0.86 | 1.03 | 1.72E-01 | 1.65E-01 |
| 6 | rs2516456  | 31420018 | A | 0.48 | 0.50 | G | 0.94 | 0.86 | 1.03 | 1.87E-01 | 1.80E-01 |
| 6 | rs2516454  | 31420863 | T | 0.07 | 0.08 | A | 0.83 | 0.69 | 0.99 | 3.97E-02 | 4.86E-02 |
| 6 | rs6919586  | 31421112 | G | 0.11 | 0.12 | A | 0.89 | 0.77 | 1.03 | 1.12E-01 | 6.70E-02 |
| 6 | rs3093971  | 31424607 | T | 0.11 | 0.10 | C | 1.05 | 0.90 | 1.21 | 5.61E-01 | 6.31E-01 |
| 6 | rs2395028  | 31424757 | T | 0.07 | 0.08 | C | 0.83 | 0.69 | 0.99 | 3.89E-02 | 4.71E-02 |
| 6 | rs2254386  | 31425033 | T | 0.47 | 0.48 | C | 0.97 | 0.89 | 1.07 | 5.61E-01 | 5.59E-01 |
| 6 | rs2596480  | 31425985 | A | 0.07 | 0.08 | G | 0.83 | 0.70 | 0.99 | 4.22E-02 | 5.18E-02 |
| 6 | rs3094228  | 31429927 | G | 0.18 | 0.18 | A | 1.02 | 0.91 | 1.15 | 7.18E-01 | 7.64E-01 |
| 6 | rs2255001  | 31430143 | C | 0.15 | 0.16 | G | 0.94 | 0.82 | 1.06 | 3.12E-01 | 2.71E-01 |

|   |            |          |   |      |      |   |      |      |      |          |          |
|---|------------|----------|---|------|------|---|------|------|------|----------|----------|
| 6 | rs2395029  | 31431780 | G | 0.03 | 0.03 | T | 0.97 | 0.75 | 1.25 | 7.98E-01 | 7.74E-01 |
| 6 | rs2284178  | 31432125 | T | 0.51 | 0.49 | C | 1.07 | 0.98 | 1.18 | 1.45E-01 | 1.55E-01 |
| 6 | rs3094014  | 31433558 | T | 0.17 | 0.16 | C | 1.03 | 0.91 | 1.17 | 6.03E-01 | 6.09E-01 |
| 6 | rs2516518  | 31435119 | T | 0.08 | 0.11 | C | 0.72 | 0.61 | 0.85 | 9.91E-05 | 1.41E-04 |
| 6 | rs4713466  | 31435869 | T | 0.17 | 0.14 | C | 1.33 | 1.17 | 1.50 | 1.30E-05 | 9.87E-06 |
| 6 | rs2518028  | 31436047 | A | 0.31 | 0.33 | G | 0.91 | 0.83 | 1.01 | 7.74E-02 | 9.62E-02 |
| 6 | rs2523674  | 31436789 | C | 0.45 | 0.47 | T | 0.91 | 0.83 | 1.00 | 4.53E-02 | 3.93E-02 |
| 6 | rs2395031  | 31437305 | A | 0.06 | 0.05 | G | 1.09 | 0.89 | 1.33 | 4.26E-01 | 4.57E-01 |
| 6 | rs9267137  | 31438397 | C | 0.06 | 0.06 | T | 1.07 | 0.88 | 1.30 | 5.08E-01 | 5.44E-01 |
| 6 | rs7758090  | 31438794 | T | 0.07 | 0.07 | C | 1.01 | 0.84 | 1.22 | 8.83E-01 | 9.16E-01 |
| 6 | rs2844505  | 31439063 | G | 0.24 | 0.26 | A | 0.90 | 0.81 | 1.00 | 5.13E-02 | 5.79E-02 |
| 6 | rs1055569  | 31440082 | T | 0.33 | 0.34 | C | 0.96 | 0.87 | 1.06 | 4.41E-01 | 3.69E-01 |
| 6 | rs2516440  | 31440497 | T | 0.33 | 0.34 | C | 0.95 | 0.87 | 1.05 | 3.42E-01 | 2.79E-01 |
| 6 | rs4413654  | 31441349 | A | 0.26 | 0.27 | G | 0.94 | 0.85 | 1.05 | 2.76E-01 | 1.99E-01 |
| 6 | rs12665745 | 31441901 | A | 0.16 | 0.16 | G | 0.98 | 0.87 | 1.11 | 7.66E-01 | 6.34E-01 |
| 6 | rs6940467  | 31442137 | G | 0.10 | 0.11 | A | 0.90 | 0.77 | 1.05 | 1.87E-01 | 1.80E-01 |
| 6 | rs3131643  | 31442782 | T | 0.13 | 0.13 | C | 1.07 | 0.93 | 1.22 | 3.43E-01 | 3.34E-01 |
| 6 | rs12660382 | 31443323 | T | 0.19 | 0.20 | C | 0.96 | 0.86 | 1.08 | 5.25E-01 | 4.13E-01 |
| 6 | rs16899682 | 31443699 | C | 0.03 | 0.03 | G | 1.21 | 0.93 | 1.58 | 1.62E-01 | 1.54E-01 |
| 6 | rs2596534  | 31445345 | C | 0.41 | 0.41 | T | 0.97 | 0.88 | 1.06 | 4.98E-01 | 4.38E-01 |
| 6 | rs2395488  | 31445909 | G | 0.34 | 0.34 | A | 0.99 | 0.90 | 1.09 | 8.76E-01 | 8.20E-01 |
| 6 | rs2248372  | 31446466 | A | 0.31 | 0.32 | G | 0.95 | 0.86 | 1.05 | 3.02E-01 | 2.76E-01 |
| 6 | rs2248373  | 31446546 | T | 0.35 | 0.34 | C | 1.06 | 0.96 | 1.17 | 2.43E-01 | 1.91E-01 |
| 6 | rs2248462  | 31446796 | A | 0.20 | 0.21 | G | 0.91 | 0.81 | 1.02 | 1.01E-01 | 1.05E-01 |
| 6 | rs2516513  | 31447588 | A | 0.20 | 0.21 | G | 0.91 | 0.81 | 1.02 | 1.20E-01 | 1.25E-01 |
| 6 | rs2516424  | 31448315 | C | 0.34 | 0.34 | T | 0.99 | 0.90 | 1.09 | 8.42E-01 | 7.84E-01 |
| 6 | rs2248617  | 31448533 | A | 0.34 | 0.34 | G | 0.99 | 0.90 | 1.09 | 8.69E-01 | 8.06E-01 |
| 6 | rs3828893  | 31448653 | A | 0.06 | 0.07 | G | 0.91 | 0.75 | 1.09 | 2.95E-01 | 2.73E-01 |
| 6 | rs3749946  | 31448862 | A | 0.08 | 0.07 | C | 1.09 | 0.91 | 1.29 | 3.52E-01 | 3.80E-01 |
| 6 | rs3099844  | 31448976 | A | 0.11 | 0.11 | C | 0.98 | 0.85 | 1.14 | 7.85E-01 | 8.09E-01 |
| 6 | rs2905722  | 31449327 | T | 0.12 | 0.14 | C | 0.83 | 0.73 | 0.96 | 8.76E-03 | 1.26E-02 |
| 6 | rs2516509  | 31449994 | G | 0.20 | 0.21 | A | 0.91 | 0.81 | 1.02 | 9.60E-02 | 9.79E-02 |
| 6 | rs2523710  | 31450909 | T | 0.17 | 0.18 | C | 0.97 | 0.86 | 1.10 | 6.72E-01 | 5.32E-01 |
| 6 | rs2523706  | 31451567 | G | 0.31 | 0.31 | A | 1.00 | 0.90 | 1.10 | 9.59E-01 | 8.62E-01 |

|   |            |          |   |      |      |   |      |      |      |          |          |
|---|------------|----------|---|------|------|---|------|------|------|----------|----------|
| 6 | rs2904600  | 31453113 | G | 0.20 | 0.21 | T | 0.90 | 0.80 | 1.01 | 6.88E-02 | 7.18E-02 |
| 6 | rs9267212  | 31453618 | T | 0.07 | 0.07 | G | 0.94 | 0.79 | 1.13 | 5.39E-01 | 4.92E-01 |
| 6 | rs17193640 | 31454887 | C | 0.07 | 0.08 | T | 0.80 | 0.66 | 0.96 | 1.77E-02 | 1.99E-02 |
| 6 | rs3094009  | 31457178 | A | 0.20 | 0.20 | G | 0.98 | 0.87 | 1.10 | 7.27E-01 | 6.26E-01 |
| 6 | rs9267289  | 31458205 | A | 0.07 | 0.07 | T | 0.95 | 0.79 | 1.15 | 6.16E-01 | 5.62E-01 |
| 6 | rs2516415  | 31459742 | T | 0.33 | 0.33 | C | 1.01 | 0.91 | 1.11 | 9.12E-01 | 9.64E-01 |
| 6 | rs3130922  | 31461089 | A | 0.33 | 0.33 | G | 0.96 | 0.87 | 1.06 | 4.29E-01 | 4.82E-01 |
| 6 | rs3828903  | 31464739 | A | 0.36 | 0.31 | G | 1.22 | 1.11 | 1.34 | 6.83E-05 | 7.06E-05 |
| 6 | rs3828914  | 31465819 | T | 0.35 | 0.31 | C | 1.23 | 1.11 | 1.35 | 3.37E-05 | 2.83E-05 |
| 6 | rs2855807  | 31469323 | C | 0.33 | 0.37 | T | 0.81 | 0.74 | 0.90 | 2.83E-05 | 4.07E-05 |
| 6 | rs2516496  | 31469491 | G | 0.14 | 0.15 | C | 0.93 | 0.81 | 1.06 | 2.62E-01 | 2.65E-01 |
| 6 | rs2534657  | 31472459 | A | 0.14 | 0.15 | G | 0.93 | 0.81 | 1.06 | 2.58E-01 | 2.52E-01 |
| 6 | rs2855812  | 31472720 | T | 0.22 | 0.23 | G | 0.96 | 0.86 | 1.07 | 4.72E-01 | 4.57E-01 |
| 6 | rs3134899  | 31473286 | C | 0.19 | 0.22 | T | 0.81 | 0.72 | 0.90 | 1.92E-04 | 2.53E-04 |
| 6 | rs3130615  | 31475413 | C | 0.22 | 0.26 | T | 0.82 | 0.74 | 0.92 | 4.25E-04 | 4.99E-04 |
| 6 | rs3132468  | 31475486 | G | 0.22 | 0.26 | A | 0.82 | 0.74 | 0.92 | 4.25E-04 | 4.99E-04 |
| 6 | rs3131635  | 31476134 | T | 0.22 | 0.25 | C | 0.84 | 0.75 | 0.93 | 1.27E-03 | 1.43E-03 |
| 6 | rs2844498  | 31476854 | A | 0.46 | 0.43 | G | 1.14 | 1.04 | 1.25 | 6.43E-03 | 5.75E-03 |
| 6 | rs2844496  | 31480398 | A | 0.10 | 0.11 | G | 0.87 | 0.74 | 1.01 | 7.17E-02 | 8.25E-02 |
| 6 | rs3131633  | 31480923 | T | 0.16 | 0.18 | C | 0.87 | 0.77 | 0.98 | 2.74E-02 | 3.77E-02 |
| 6 | rs2516400  | 31481105 | T | 0.32 | 0.31 | C | 1.02 | 0.93 | 1.13 | 6.34E-01 | 7.05E-01 |
| 6 | rs2516399  | 31481299 | C | 0.09 | 0.11 | T | 0.85 | 0.73 | 1.00 | 4.28E-02 | 4.96E-02 |
| 6 | rs2246986  | 31482203 | G | 0.10 | 0.11 | A | 0.87 | 0.75 | 1.02 | 7.65E-02 | 8.77E-02 |
| 6 | rs2844494  | 31483415 | G | 0.30 | 0.34 | T | 0.84 | 0.76 | 0.93 | 4.51E-04 | 7.40E-04 |
| 6 | rs9267444  | 31483458 | A | 0.35 | 0.34 | G | 1.03 | 0.93 | 1.13 | 6.17E-01 | 5.81E-01 |
| 6 | rs9267445  | 31483481 | C | 0.10 | 0.10 | G | 0.97 | 0.84 | 1.13 | 7.22E-01 | 7.62E-01 |
| 6 | rs2395045  | 31484517 | C | 0.20 | 0.23 | T | 0.86 | 0.77 | 0.96 | 7.14E-03 | 9.73E-03 |
| 6 | rs3131631  | 31484683 | C | 0.20 | 0.23 | G | 0.86 | 0.77 | 0.96 | 6.95E-03 | 9.49E-03 |
| 6 | rs3093998  | 31485174 | G | 0.34 | 0.36 | T | 0.92 | 0.83 | 1.01 | 9.23E-02 | 1.03E-01 |
| 6 | rs3130637  | 31488145 | T | 0.23 | 0.25 | C | 0.91 | 0.82 | 1.01 | 8.67E-02 | 1.05E-01 |
| 6 | rs3132454  | 31489644 | C | 0.38 | 0.38 | T | 1.00 | 0.91 | 1.09 | 9.22E-01 | 8.53E-01 |
| 6 | rs3093993  | 31490725 | G | 0.23 | 0.25 | T | 0.91 | 0.82 | 1.01 | 8.42E-02 | 1.02E-01 |
| 6 | rs9469021  | 31490970 | T | 0.02 | 0.03 | C | 0.71 | 0.52 | 0.96 | 2.49E-02 | 1.76E-02 |
| 6 | rs3095227  | 31491000 | T | 0.23 | 0.25 | C | 0.91 | 0.81 | 1.01 | 7.69E-02 | 9.46E-02 |

|   |            |          |   |      |      |   |      |      |      |          |          |
|---|------------|----------|---|------|------|---|------|------|------|----------|----------|
| 6 | rs3093988  | 31492453 | T | 0.17 | 0.15 | C | 1.13 | 1.00 | 1.28 | 5.34E-02 | 4.42E-02 |
| 6 | rs3093986  | 31493421 | A | 0.17 | 0.19 | T | 0.87 | 0.77 | 0.98 | 2.30E-02 | 3.29E-02 |
| 6 | rs2734574  | 31493888 | T | 0.39 | 0.37 | A | 1.08 | 0.99 | 1.19 | 9.36E-02 | 9.44E-02 |
| 6 | rs3093983  | 31496925 | C | 0.16 | 0.19 | T | 0.87 | 0.77 | 0.98 | 2.44E-02 | 3.37E-02 |
| 6 | rs3130055  | 31497399 | C | 0.22 | 0.26 | T | 0.83 | 0.75 | 0.93 | 9.93E-04 | 1.22E-03 |
| 6 | rs3093978  | 31498497 | G | 0.17 | 0.19 | T | 0.87 | 0.77 | 0.98 | 2.23E-02 | 3.15E-02 |
| 6 | rs3853601  | 31499603 | C | 0.14 | 0.12 | G | 1.18 | 1.03 | 1.35 | 2.07E-02 | 2.12E-02 |
| 6 | rs3093948  | 31501413 | T | 0.17 | 0.19 | C | 0.87 | 0.77 | 0.98 | 1.94E-02 | 2.71E-02 |
| 6 | rs1055388  | 31501737 | G | 0.22 | 0.26 | A | 0.84 | 0.75 | 0.93 | 1.30E-03 | 1.58E-03 |
| 6 | rs3093976  | 31502861 | T | 0.17 | 0.19 | C | 0.87 | 0.77 | 0.99 | 2.77E-02 | 3.86E-02 |
| 6 | rs3130057  | 31504587 | G | 0.17 | 0.19 | T | 0.87 | 0.77 | 0.99 | 2.81E-02 | 3.90E-02 |
| 6 | rs2734583  | 31505480 | C | 0.10 | 0.11 | T | 0.98 | 0.85 | 1.14 | 8.24E-01 | 8.57E-01 |
| 6 | rs3130058  | 31505887 | T | 0.17 | 0.19 | C | 0.87 | 0.77 | 0.98 | 2.67E-02 | 3.73E-02 |
| 6 | rs933208   | 31506648 | C | 0.22 | 0.26 | A | 0.83 | 0.75 | 0.93 | 1.08E-03 | 1.30E-03 |
| 6 | rs2071596  | 31506691 | T | 0.19 | 0.17 | C | 1.15 | 1.02 | 1.30 | 2.30E-02 | 2.06E-02 |
| 6 | rs2516393  | 31506744 | T | 0.17 | 0.19 | G | 0.87 | 0.77 | 0.99 | 2.76E-02 | 3.82E-02 |
| 6 | rs2239709  | 31507447 | A | 0.06 | 0.07 | G | 0.81 | 0.67 | 0.99 | 3.41E-02 | 2.43E-02 |
| 6 | rs12665501 | 31508069 | G | 0.02 | 0.02 | T | 0.98 | 0.69 | 1.39 | 8.90E-01 | 8.34E-01 |
| 6 | rs7738430  | 31508836 | C | 0.03 | 0.03 | T | 0.86 | 0.64 | 1.15 | 3.00E-01 | 3.00E-01 |
| 6 | rs2523507  | 31509355 | C | 0.23 | 0.26 | T | 0.84 | 0.75 | 0.93 | 1.31E-03 | 1.67E-03 |
| 6 | rs2523505  | 31510002 | C | 0.07 | 0.08 | G | 0.98 | 0.83 | 1.17 | 8.43E-01 | 8.78E-01 |
| 6 | rs2844509  | 31510924 | C | 0.25 | 0.25 | T | 0.97 | 0.87 | 1.08 | 5.36E-01 | 4.84E-01 |
| 6 | rs12662306 | 31511138 | C | 0.02 | 0.02 | A | 0.95 | 0.67 | 1.36 | 7.97E-01 | 7.51E-01 |
| 6 | rs9267487  | 31511350 | C | 0.06 | 0.06 | T | 1.04 | 0.86 | 1.26 | 6.85E-01 | 7.15E-01 |
| 6 | rs2251824  | 31511857 | A | 0.16 | 0.16 | G | 1.00 | 0.88 | 1.14 | 9.68E-01 | 9.72E-01 |
| 6 | rs2071593  | 31512799 | T | 0.06 | 0.07 | C | 0.82 | 0.67 | 0.99 | 3.45E-02 | 2.46E-02 |
| 6 | rs2239705  | 31513402 | T | 0.18 | 0.18 | C | 0.96 | 0.85 | 1.08 | 5.00E-01 | 4.62E-01 |
| 6 | rs2523503  | 31513559 | T | 0.16 | 0.16 | G | 1.00 | 0.88 | 1.14 | 9.86E-01 | 9.55E-01 |
| 6 | rs2071591  | 31515799 | T | 0.37 | 0.33 | C | 1.19 | 1.08 | 1.31 | 3.40E-04 | 2.36E-04 |
| 6 | rs3219183  | 31516363 | C | 0.04 | 0.04 | G | 0.92 | 0.73 | 1.16 | 4.77E-01 | 4.59E-01 |
| 6 | rs7738380  | 31518015 | G | 0.02 | 0.01 | A | 1.77 | 1.24 | 2.54 | 1.60E-03 | 1.89E-03 |
| 6 | rs2523500  | 31518354 | C | 0.34 | 0.37 | T | 0.89 | 0.81 | 0.98 | 1.45E-02 | 1.85E-02 |
| 6 | rs6916921  | 31520426 | T | 0.10 | 0.10 | C | 0.92 | 0.79 | 1.08 | 2.98E-01 | 2.44E-01 |
| 6 | rs35969216 | 31521242 | T | 0.01 | 0.01 | C | 0.78 | 0.48 | 1.26 | 3.02E-01 | 3.32E-01 |



|   |            |          |   |      |      |   |      |      |      |          |          |
|---|------------|----------|---|------|------|---|------|------|------|----------|----------|
| 6 | rs2255798  | 31521302 | G | 0.13 | 0.13 | C | 0.96 | 0.84 | 1.10 | 5.61E-01 | 5.02E-01 |
| 6 | rs6929796  | 31522669 | A | 0.19 | 0.17 | G | 1.17 | 1.04 | 1.32 | 1.16E-02 | 1.01E-02 |
| 6 | rs2857605  | 31524851 | G | 0.18 | 0.21 | A | 0.83 | 0.74 | 0.94 | 2.03E-03 | 3.05E-03 |
| 6 | rs2230365  | 31525448 | T | 0.14 | 0.15 | C | 0.94 | 0.83 | 1.08 | 3.86E-01 | 3.29E-01 |
| 6 | rs13192469 | 31526856 | C | 0.04 | 0.04 | T | 0.92 | 0.73 | 1.17 | 5.05E-01 | 4.93E-01 |
| 6 | rs4947324  | 31528130 | T | 0.09 | 0.10 | C | 0.92 | 0.79 | 1.08 | 3.13E-01 | 2.52E-01 |
| 6 | rs17200733 | 31528951 | G | 0.13 | 0.11 | A | 1.25 | 1.08 | 1.44 | 2.09E-03 | 2.17E-03 |
| 6 | rs2516390  | 31529883 | G | 0.38 | 0.41 | A | 0.88 | 0.80 | 0.97 | 7.32E-03 | 9.00E-03 |
| 6 | rs928815   | 31531215 | A | 0.38 | 0.41 | C | 0.88 | 0.80 | 0.97 | 7.75E-03 | 9.48E-03 |
| 6 | rs2857709  | 31532814 | T | 0.12 | 0.14 | C | 0.83 | 0.72 | 0.95 | 5.70E-03 | 6.93E-03 |
| 6 | rs2857708  | 31533606 | A | 0.13 | 0.13 | G | 0.96 | 0.83 | 1.10 | 5.10E-01 | 4.55E-01 |
| 6 | rs17200740 | 31535539 | C | 0.01 | 0.01 | A | 0.79 | 0.53 | 1.20 | 2.72E-01 | 2.73E-01 |
| 6 | rs2009658  | 31538244 | G | 0.16 | 0.16 | C | 0.99 | 0.87 | 1.13 | 9.11E-01 | 8.36E-01 |
| 6 | rs2844482  | 31539767 | A | 0.16 | 0.16 | G | 0.98 | 0.87 | 1.12 | 7.89E-01 | 7.17E-01 |
| 6 | rs1800683  | 31540071 | A | 0.37 | 0.33 | G | 1.20 | 1.09 | 1.32 | 1.58E-04 | 1.03E-04 |
| 6 | rs2229094  | 31540556 | C | 0.25 | 0.26 | T | 0.95 | 0.86 | 1.06 | 3.75E-01 | 2.89E-01 |
| 6 | rs2229092  | 31540757 | C | 0.05 | 0.06 | A | 0.85 | 0.69 | 1.04 | 1.09E-01 | 9.02E-02 |
| 6 | rs1041981  | 31540784 | A | 0.37 | 0.33 | C | 1.19 | 1.08 | 1.31 | 3.17E-04 | 2.14E-04 |
| 6 | rs3093662  | 31544189 | G | 0.08 | 0.07 | A | 1.02 | 0.86 | 1.22 | 8.01E-01 | 8.51E-01 |
| 6 | rs3093668  | 31546495 | C | 0.04 | 0.04 | G | 0.99 | 0.78 | 1.26 | 9.62E-01 | 9.08E-01 |
| 6 | rs7766988  | 31551347 | C | 0.04 | 0.03 | G | 1.18 | 0.92 | 1.52 | 1.92E-01 | 1.79E-01 |
| 6 | rs17200768 | 31553935 | T | 0.01 | 0.02 | C | 0.74 | 0.50 | 1.10 | 1.31E-01 | 1.32E-01 |
| 6 | rs2256965  | 31555130 | T | 0.40 | 0.44 | C | 0.86 | 0.79 | 0.95 | 2.02E-03 | 2.18E-03 |
| 6 | rs9267503  | 31555189 | A | 0.02 | 0.01 | G | 1.83 | 1.19 | 2.80 | 5.14E-03 | 5.60E-03 |
| 6 | rs13211368 | 31555818 | A | 0.02 | 0.01 | G | 1.07 | 0.73 | 1.57 | 7.24E-01 | 7.86E-01 |
| 6 | rs986475   | 31556709 | C | 0.09 | 0.10 | T | 0.90 | 0.77 | 1.05 | 1.78E-01 | 1.45E-01 |
| 6 | rs11575841 | 31557491 | A | 0.03 | 0.03 | G | 1.16 | 0.89 | 1.51 | 2.75E-01 | 2.72E-01 |
| 6 | rs2736191  | 31560910 | C | 0.03 | 0.04 | G | 0.87 | 0.67 | 1.12 | 2.70E-01 | 2.81E-01 |
| 6 | rs2844480  | 31564821 | A | 0.20 | 0.20 | G | 1.00 | 0.89 | 1.12 | 9.96E-01 | 9.23E-01 |
| 6 | rs2509217  | 31566204 | T | 0.03 | 0.03 | C | 1.00 | 0.77 | 1.30 | 9.99E-01 | 9.39E-01 |
| 6 | rs17200810 | 31566507 | A | 0.03 | 0.03 | G | 1.14 | 0.87 | 1.50 | 3.39E-01 | 2.97E-01 |
| 6 | rs2857596  | 31567422 | C | 0.23 | 0.26 | A | 0.87 | 0.79 | 0.97 | 1.42E-02 | 1.87E-02 |
| 6 | rs2857595  | 31568469 | T | 0.20 | 0.19 | C | 1.07 | 0.96 | 1.21 | 2.30E-01 | 1.97E-01 |
| 6 | rs2857700  | 31572481 | A | 0.11 | 0.12 | G | 0.86 | 0.74 | 0.99 | 3.37E-02 | 4.09E-02 |

|   |            |          |   |      |      |   |      |      |      |          |          |
|---|------------|----------|---|------|------|---|------|------|------|----------|----------|
| 6 | rs9378200  | 31572927 | C | 0.06 | 0.07 | T | 0.82 | 0.67 | 1.00 | 4.45E-02 | 2.99E-02 |
| 6 | rs2844479  | 31572956 | G | 0.38 | 0.36 | T | 1.11 | 1.01 | 1.22 | 2.74E-02 | 3.55E-02 |
| 6 | rs9348876  | 31575276 | T | 0.07 | 0.07 | C | 0.88 | 0.73 | 1.05 | 1.56E-01 | 1.24E-01 |
| 6 | rs2844477  | 31578772 | G | 0.39 | 0.38 | A | 1.04 | 0.95 | 1.15 | 3.95E-01 | 5.17E-01 |
| 6 | rs3132451  | 31582025 | G | 0.19 | 0.18 | C | 1.08 | 0.96 | 1.22 | 1.87E-01 | 1.55E-01 |
| 6 | rs2844475  | 31583155 | T | 0.41 | 0.40 | C | 1.04 | 0.95 | 1.14 | 3.75E-01 | 5.26E-01 |
| 6 | rs28732150 | 31583224 | A | 0.05 | 0.06 | G | 0.82 | 0.66 | 1.01 | 6.00E-02 | 4.78E-02 |
| 6 | rs2269475  | 31583931 | A | 0.12 | 0.14 | G | 0.86 | 0.75 | 0.99 | 3.01E-02 | 3.27E-02 |
| 6 | rs2857597  | 31585000 | A | 0.25 | 0.26 | T | 0.95 | 0.86 | 1.06 | 3.36E-01 | 4.35E-01 |
| 6 | rs2736177  | 31586094 | G | 0.11 | 0.14 | A | 0.79 | 0.68 | 0.91 | 8.27E-04 | 1.25E-03 |
| 6 | rs2736176  | 31587561 | G | 0.33 | 0.31 | C | 1.09 | 0.99 | 1.20 | 9.67E-02 | 1.32E-01 |
| 6 | rs2736173  | 31589735 | A | 0.03 | 0.02 | G | 1.21 | 0.92 | 1.60 | 1.75E-01 | 1.92E-01 |
| 6 | rs3130622  | 31592524 | C | 0.17 | 0.17 | G | 1.05 | 0.93 | 1.18 | 4.74E-01 | 4.28E-01 |
| 6 | rs2260000  | 31593476 | C | 0.39 | 0.38 | T | 1.05 | 0.95 | 1.15 | 3.30E-01 | 4.45E-01 |
| 6 | rs3130071  | 31594628 | T | 0.11 | 0.14 | A | 0.79 | 0.68 | 0.91 | 9.23E-04 | 1.42E-03 |
| 6 | rs17207225 | 31597757 | T | 0.02 | 0.02 | C | 0.98 | 0.73 | 1.33 | 9.08E-01 | 7.91E-01 |
| 6 | rs3115663  | 31601843 | G | 0.17 | 0.17 | A | 1.03 | 0.92 | 1.17 | 5.87E-01 | 5.29E-01 |
| 6 | rs1046089  | 31602967 | A | 0.34 | 0.34 | G | 1.01 | 0.91 | 1.11 | 9.26E-01 | 8.42E-01 |
| 6 | rs2261033  | 31603591 | C | 0.48 | 0.47 | T | 1.01 | 0.92 | 1.11 | 8.74E-01 | 1.00E+00 |
| 6 | rs3132453  | 31604044 | A | 0.06 | 0.07 | C | 0.83 | 0.69 | 1.00 | 4.94E-02 | 5.76E-02 |
| 6 | rs35502919 | 31604355 | A | 0.07 | 0.05 | C | 1.68 | 1.38 | 2.04 | 1.00E-07 | 6.47E-08 |
| 6 | rs743400   | 31607111 | C | 0.06 | 0.06 | T | 0.92 | 0.76 | 1.12 | 4.18E-01 | 4.40E-01 |
| 6 | rs9267525  | 31607942 | C | 0.08 | 0.06 | T | 1.28 | 1.08 | 1.52 | 5.12E-03 | 4.31E-03 |
| 6 | rs3130628  | 31609272 | C | 0.17 | 0.17 | T | 1.03 | 0.91 | 1.16 | 6.34E-01 | 5.70E-01 |
| 6 | rs1077394  | 31610384 | G | 0.31 | 0.34 | A | 0.88 | 0.79 | 0.97 | 8.01E-03 | 1.04E-02 |
| 6 | rs1077393  | 31610529 | T | 0.48 | 0.51 | C | 0.91 | 0.83 | 1.00 | 4.01E-02 | 5.58E-02 |
| 6 | rs3130048  | 31613739 | C | 0.25 | 0.25 | T | 0.98 | 0.88 | 1.09 | 6.90E-01 | 6.92E-01 |
| 6 | rs2844463  | 31615167 | T | 0.16 | 0.13 | C | 1.26 | 1.11 | 1.44 | 4.49E-04 | 4.09E-04 |
| 6 | rs805303   | 31616366 | T | 0.37 | 0.37 | C | 1.01 | 0.92 | 1.11 | 8.74E-01 | 8.26E-01 |
| 6 | rs805302   | 31617957 | G | 0.37 | 0.37 | T | 1.01 | 0.91 | 1.11 | 9.16E-01 | 8.67E-01 |
| 6 | rs805301   | 31618121 | G | 0.37 | 0.37 | T | 1.00 | 0.91 | 1.11 | 9.27E-01 | 8.78E-01 |
| 6 | rs805300   | 31618567 | C | 0.05 | 0.04 | T | 1.36 | 1.09 | 1.71 | 7.21E-03 | 7.47E-03 |
| 6 | rs3130050  | 31618761 | G | 0.11 | 0.14 | A | 0.80 | 0.70 | 0.92 | 2.01E-03 | 2.98E-03 |
| 6 | rs3117583  | 31619576 | C | 0.17 | 0.17 | T | 1.04 | 0.92 | 1.17 | 5.53E-01 | 4.96E-01 |

|   |            |          |   |      |      |   |      |      |      |          |          |
|---|------------|----------|---|------|------|---|------|------|------|----------|----------|
| 6 | rs813115   | 31620020 | C | 0.37 | 0.37 | T | 1.00 | 0.91 | 1.10 | 9.42E-01 | 8.94E-01 |
| 6 | rs3117582  | 31620520 | C | 0.09 | 0.10 | A | 0.88 | 0.75 | 1.03 | 1.07E-01 | 1.18E-01 |
| 6 | rs805298   | 31621095 | A | 0.05 | 0.03 | C | 1.46 | 1.16 | 1.84 | 1.19E-03 | 1.18E-03 |
| 6 | rs805264   | 31623873 | T | 0.05 | 0.03 | C | 1.38 | 1.09 | 1.74 | 6.98E-03 | 7.06E-03 |
| 6 | rs3132449  | 31626013 | A | 0.09 | 0.10 | G | 0.88 | 0.75 | 1.03 | 1.22E-01 | 1.33E-01 |
| 6 | rs28732157 | 31628216 | T | 0.05 | 0.06 | C | 0.84 | 0.68 | 1.03 | 9.34E-02 | 7.49E-02 |
| 6 | rs805262   | 31628733 | A | 0.47 | 0.47 | G | 1.00 | 0.91 | 1.10 | 9.91E-01 | 8.73E-01 |
| 6 | rs707974   | 31629499 | C | 0.12 | 0.10 | T | 1.32 | 1.14 | 1.53 | 2.01E-04 | 2.04E-04 |
| 6 | rs928814   | 31631907 | T | 0.02 | 0.03 | C | 0.95 | 0.71 | 1.27 | 7.34E-01 | 6.37E-01 |
| 6 | rs3130618  | 31632134 | A | 0.17 | 0.17 | C | 1.04 | 0.92 | 1.17 | 5.58E-01 | 5.00E-01 |
| 6 | rs34541484 | 31633389 | C | 0.02 | 0.02 | T | 0.80 | 0.56 | 1.15 | 2.28E-01 | 2.45E-01 |
| 6 | rs9267529  | 31634570 | C | 0.08 | 0.07 | A | 1.25 | 1.05 | 1.48 | 1.02E-02 | 8.23E-03 |
| 6 | rs14365    | 31635710 | C | 0.20 | 0.20 | T | 0.97 | 0.86 | 1.08 | 5.57E-01 | 5.54E-01 |
| 6 | rs3117578  | 31636031 | T | 0.11 | 0.14 | C | 0.80 | 0.70 | 0.92 | 1.66E-03 | 2.52E-03 |
| 6 | rs9267531  | 31636742 | G | 0.09 | 0.10 | A | 0.88 | 0.75 | 1.03 | 1.17E-01 | 1.26E-01 |
| 6 | rs805268   | 31638178 | G | 0.05 | 0.03 | T | 1.39 | 1.10 | 1.75 | 6.12E-03 | 6.19E-03 |
| 6 | rs35609644 | 31638848 | T | 0.01 | 0.02 | C | 0.84 | 0.58 | 1.22 | 3.50E-01 | 3.54E-01 |
| 6 | rs805267   | 31639757 | T | 0.05 | 0.04 | C | 1.38 | 1.10 | 1.73 | 5.42E-03 | 5.65E-03 |
| 6 | rs9267532  | 31639979 | T | 0.08 | 0.06 | C | 1.29 | 1.09 | 1.54 | 3.46E-03 | 2.91E-03 |
| 6 | rs1266076  | 31640518 | C | 0.37 | 0.37 | A | 1.00 | 0.91 | 1.10 | 9.64E-01 | 9.86E-01 |
| 6 | rs707919   | 31641139 | C | 0.33 | 0.31 | T | 1.09 | 0.99 | 1.20 | 8.75E-02 | 1.21E-01 |
| 6 | rs805272   | 31641386 | A | 0.05 | 0.03 | C | 1.39 | 1.10 | 1.75 | 6.37E-03 | 6.39E-03 |
| 6 | rs805269   | 31644282 | C | 0.05 | 0.04 | T | 1.36 | 1.08 | 1.71 | 7.72E-03 | 8.22E-03 |
| 6 | rs2280800  | 31646398 | T | 0.12 | 0.14 | G | 0.86 | 0.75 | 0.99 | 3.35E-02 | 3.83E-02 |
| 6 | rs9267534  | 31646766 | C | 0.08 | 0.07 | T | 1.25 | 1.06 | 1.48 | 9.26E-03 | 7.48E-03 |
| 6 | rs9267536  | 31651194 | C | 0.05 | 0.04 | A | 1.25 | 1.00 | 1.56 | 4.65E-02 | 4.63E-02 |
| 6 | rs707918   | 31654732 | T | 0.28 | 0.27 | A | 1.06 | 0.95 | 1.17 | 3.05E-01 | 2.86E-01 |
| 6 | rs915653   | 31657047 | C | 0.01 | 0.01 | T | 1.19 | 0.77 | 1.84 | 4.23E-01 | 5.29E-01 |
| 6 | rs805283   | 31657924 | T | 0.05 | 0.04 | C | 1.38 | 1.10 | 1.73 | 5.37E-03 | 5.39E-03 |
| 6 | rs28366155 | 31658634 | G | 0.06 | 0.06 | A | 0.92 | 0.76 | 1.12 | 3.99E-01 | 4.20E-01 |
| 6 | rs11552114 | 31660848 | T | 0.01 | 0.02 | C | 0.81 | 0.55 | 1.20 | 2.88E-01 | 2.65E-01 |
| 6 | rs805281   | 31661489 | G | 0.28 | 0.27 | A | 1.05 | 0.95 | 1.17 | 3.38E-01 | 3.19E-01 |
| 6 | rs805277   | 31662957 | A | 0.28 | 0.27 | G | 1.05 | 0.95 | 1.16 | 3.38E-01 | 3.26E-01 |
| 6 | rs805274   | 31665194 | G | 0.28 | 0.27 | A | 1.05 | 0.95 | 1.16 | 3.50E-01 | 3.29E-01 |

|   |            |          |   |      |      |   |      |      |      |          |          |
|---|------------|----------|---|------|------|---|------|------|------|----------|----------|
| 6 | rs805273   | 31665452 | T | 0.07 | 0.06 | C | 1.20 | 1.00 | 1.43 | 4.76E-02 | 5.42E-02 |
| 6 | rs2295663  | 31669295 | C | 0.05 | 0.06 | T | 0.82 | 0.67 | 1.01 | 6.48E-02 | 5.17E-02 |
| 6 | rs984685   | 31669457 | A | 0.04 | 0.04 | G | 0.94 | 0.75 | 1.19 | 6.34E-01 | 6.30E-01 |
| 6 | rs1266071  | 31669496 | A | 0.12 | 0.10 | G | 1.31 | 1.13 | 1.52 | 2.69E-04 | 2.76E-04 |
| 6 | rs9267545  | 31671879 | A | 0.08 | 0.07 | G | 1.25 | 1.06 | 1.48 | 8.91E-03 | 7.32E-03 |
| 6 | rs34406901 | 31672268 | G | 0.08 | 0.05 | A | 1.43 | 1.19 | 1.72 | 1.24E-04 | 8.12E-05 |
| 6 | rs9267546  | 31673436 | A | 0.10 | 0.09 | G | 1.15 | 0.99 | 1.34 | 7.29E-02 | 6.13E-02 |
| 6 | rs2242653  | 31675765 | T | 0.14 | 0.16 | C | 0.82 | 0.72 | 0.94 | 3.27E-03 | 3.46E-03 |
| 6 | rs805286   | 31679307 | C | 0.27 | 0.28 | T | 0.96 | 0.86 | 1.06 | 3.86E-01 | 3.54E-01 |
| 6 | rs9469040  | 31679874 | T | 0.04 | 0.03 | G | 1.43 | 1.13 | 1.82 | 3.17E-03 | 3.21E-03 |
| 6 | rs385306   | 31681160 | T | 0.23 | 0.23 | C | 0.99 | 0.89 | 1.11 | 8.87E-01 | 8.52E-01 |
| 6 | rs442391   | 31681289 | A | 0.02 | 0.02 | G | 0.79 | 0.56 | 1.10 | 1.63E-01 | 1.60E-01 |
| 6 | rs9469042  | 31683018 | C | 0.05 | 0.03 | T | 1.47 | 1.16 | 1.86 | 1.29E-03 | 1.41E-03 |
| 6 | rs3749952  | 31683157 | G | 0.04 | 0.03 | T | 1.45 | 1.14 | 1.84 | 2.43E-03 | 2.49E-03 |
| 6 | rs3131384  | 31685654 | C | 0.16 | 0.18 | G | 0.84 | 0.74 | 0.95 | 5.16E-03 | 6.44E-03 |
| 6 | rs396763   | 31686726 | G | 0.01 | 0.02 | A | 0.80 | 0.54 | 1.18 | 2.61E-01 | 2.42E-01 |
| 6 | rs1065356  | 31687008 | T | 0.20 | 0.22 | C | 0.90 | 0.81 | 1.01 | 7.58E-02 | 6.76E-02 |
| 6 | rs805294   | 31688217 | C | 0.34 | 0.35 | T | 0.94 | 0.85 | 1.03 | 1.85E-01 | 1.79E-01 |
| 6 | rs805293   | 31688518 | T | 0.51 | 0.47 | A | 1.18 | 1.07 | 1.29 | 5.54E-04 | 6.37E-04 |
| 6 | rs805292   | 31690009 | T | 0.20 | 0.22 | C | 0.90 | 0.81 | 1.01 | 6.29E-02 | 5.83E-02 |
| 6 | rs805306   | 31692163 | C | 0.34 | 0.35 | T | 0.95 | 0.86 | 1.05 | 3.14E-01 | 2.98E-01 |
| 6 | rs11575845 | 31692386 | G | 0.05 | 0.06 | C | 0.88 | 0.71 | 1.09 | 2.37E-01 | 2.45E-01 |
| 6 | rs28366162 | 31695590 | C | 0.06 | 0.06 | T | 0.91 | 0.75 | 1.11 | 3.56E-01 | 3.70E-01 |
| 6 | rs805305   | 31697387 | C | 0.34 | 0.35 | G | 0.93 | 0.85 | 1.03 | 1.51E-01 | 1.46E-01 |
| 6 | rs805304   | 31698088 | C | 0.34 | 0.35 | A | 0.93 | 0.84 | 1.03 | 1.43E-01 | 1.38E-01 |
| 6 | rs17201046 | 31699573 | A | 0.02 | 0.03 | G | 0.56 | 0.40 | 0.79 | 9.00E-04 | 6.53E-04 |
| 6 | rs28381339 | 31706474 | C | 0.01 | 0.01 | G | 0.93 | 0.59 | 1.45 | 7.39E-01 | 8.08E-01 |
| 6 | rs3131382  | 31707730 | A | 0.06 | 0.07 | G | 0.80 | 0.66 | 0.97 | 1.98E-02 | 2.32E-02 |
| 6 | rs28381348 | 31708910 | C | 0.04 | 0.04 | T | 1.07 | 0.85 | 1.35 | 5.55E-01 | 5.55E-01 |
| 6 | rs707915   | 31710968 | T | 0.08 | 0.06 | A | 1.24 | 1.04 | 1.48 | 1.83E-02 | 1.53E-02 |
| 6 | rs2293861  | 31711124 | A | 0.13 | 0.16 | G | 0.77 | 0.67 | 0.88 | 8.48E-05 | 6.21E-05 |
| 6 | rs3132445  | 31712196 | T | 0.09 | 0.10 | C | 0.88 | 0.75 | 1.04 | 1.27E-01 | 1.37E-01 |
| 6 | rs3749953  | 31713124 | G | 0.10 | 0.13 | A | 0.76 | 0.66 | 0.88 | 1.81E-04 | 1.48E-04 |
| 6 | rs3828922  | 31713454 | T | 0.13 | 0.16 | C | 0.77 | 0.67 | 0.88 | 9.28E-05 | 6.73E-05 |

|   |            |          |   |      |      |   |      |      |      |          |          |
|---|------------|----------|---|------|------|---|------|------|------|----------|----------|
| 6 | rs3131379  | 31721033 | T | 0.09 | 0.10 | C | 0.88 | 0.75 | 1.03 | 1.18E-01 | 1.28E-01 |
| 6 | rs3117574  | 31725230 | A | 0.09 | 0.10 | G | 0.88 | 0.75 | 1.04 | 1.28E-01 | 1.39E-01 |
| 6 | rs707939   | 31726688 | T | 0.38 | 0.35 | G | 1.12 | 1.01 | 1.23 | 2.54E-02 | 3.23E-02 |
| 6 | rs707938   | 31729359 | C | 0.29 | 0.32 | T | 0.90 | 0.81 | 0.99 | 3.35E-02 | 3.31E-02 |
| 6 | rs707937   | 31731014 | C | 0.18 | 0.20 | G | 0.85 | 0.75 | 0.96 | 6.74E-03 | 6.93E-03 |
| 6 | rs6905572  | 31731881 | T | 0.10 | 0.13 | C | 0.76 | 0.66 | 0.88 | 2.14E-04 | 1.72E-04 |
| 6 | rs3101017  | 31733466 | G | 0.09 | 0.10 | A | 0.89 | 0.76 | 1.04 | 1.35E-01 | 1.47E-01 |
| 6 | rs707928   | 31742590 | C | 0.30 | 0.33 | T | 0.89 | 0.80 | 0.98 | 1.64E-02 | 1.54E-02 |
| 6 | rs707927   | 31745518 | C | 0.04 | 0.03 | T | 1.37 | 1.07 | 1.75 | 1.25E-02 | 1.20E-02 |
| 6 | rs35756329 | 31753423 | C | 0.02 | 0.02 | T | 1.44 | 1.04 | 2.00 | 2.93E-02 | 2.12E-02 |
| 6 | rs480092   | 31764899 | G | 0.14 | 0.17 | A | 0.84 | 0.74 | 0.95 | 6.27E-03 | 5.85E-03 |
| 6 | rs17207552 | 31765056 | C | 0.02 | 0.02 | G | 1.01 | 0.71 | 1.44 | 9.67E-01 | 9.80E-01 |
| 6 | rs17201171 | 31773975 | C | 0.02 | 0.02 | T | 0.72 | 0.52 | 1.01 | 5.92E-02 | 6.00E-02 |
| 6 | rs34636308 | 31777687 | A | 0.02 | 0.02 | G | 0.72 | 0.52 | 1.02 | 5.99E-02 | 6.04E-02 |
| 6 | rs2075800  | 31777946 | A | 0.36 | 0.34 | G | 1.12 | 1.02 | 1.24 | 1.82E-02 | 2.19E-02 |
| 6 | rs2227956  | 31778272 | C | 0.15 | 0.18 | T | 0.83 | 0.73 | 0.94 | 3.34E-03 | 3.82E-03 |
| 6 | rs34378923 | 31782855 | C | 0.01 | 0.01 | T | 0.61 | 0.39 | 0.97 | 3.45E-02 | 2.66E-02 |
| 6 | rs9469058  | 31788050 | A | 0.03 | 0.02 | T | 1.44 | 1.10 | 1.89 | 8.58E-03 | 9.81E-03 |
| 6 | rs2763979  | 31794592 | T | 0.32 | 0.34 | C | 0.92 | 0.84 | 1.02 | 9.88E-02 | 8.72E-02 |
| 6 | rs2471980  | 31800868 | G | 0.28 | 0.32 | C | 0.85 | 0.77 | 0.94 | 1.59E-03 | 1.39E-03 |
| 6 | rs4711279  | 31802465 | G | 0.10 | 0.13 | C | 0.78 | 0.67 | 0.90 | 6.10E-04 | 5.14E-04 |
| 6 | rs9368699  | 31802541 | C | 0.04 | 0.04 | T | 0.98 | 0.77 | 1.25 | 8.98E-01 | 8.01E-01 |
| 6 | rs17201248 | 31803130 | T | 0.03 | 0.02 | C | 1.23 | 0.91 | 1.65 | 1.77E-01 | 1.46E-01 |
| 6 | rs17207629 | 31804610 | A | 0.06 | 0.04 | G | 1.50 | 1.22 | 1.84 | 1.14E-04 | 8.78E-05 |
| 6 | rs11968400 | 31804729 | T | 0.07 | 0.07 | C | 1.08 | 0.91 | 1.29 | 3.82E-01 | 4.14E-01 |
| 6 | rs733539   | 31807489 | A | 0.10 | 0.13 | G | 0.78 | 0.68 | 0.90 | 6.41E-04 | 5.29E-04 |
| 6 | rs3115673  | 31810085 | A | 0.12 | 0.15 | C | 0.80 | 0.70 | 0.91 | 8.24E-04 | 7.24E-04 |
| 6 | rs12210887 | 31815723 | T | 0.06 | 0.06 | G | 1.14 | 0.94 | 1.38 | 1.76E-01 | 1.99E-01 |
| 6 | rs9501157  | 31819123 | A | 0.02 | 0.03 | G | 0.86 | 0.64 | 1.16 | 3.22E-01 | 3.28E-01 |
| 6 | rs13191375 | 31819164 | A | 0.05 | 0.03 | C | 1.49 | 1.18 | 1.88 | 7.11E-04 | 9.98E-04 |
| 6 | rs4947331  | 31821041 | T | 0.09 | 0.10 | C | 0.84 | 0.72 | 0.98 | 2.96E-02 | 2.90E-02 |
| 6 | rs9267649  | 31824828 | A | 0.15 | 0.18 | G | 0.81 | 0.71 | 0.91 | 7.94E-04 | 9.06E-04 |
| 6 | rs13118    | 31827286 | A | 0.04 | 0.03 | T | 1.47 | 1.16 | 1.86 | 1.48E-03 | 1.84E-03 |
| 6 | rs11966200 | 31837066 | T | 0.04 | 0.03 | C | 1.37 | 1.06 | 1.78 | 1.60E-02 | 1.57E-02 |

|   |            |          |   |      |      |   |      |      |      |          |          |
|---|------------|----------|---|------|------|---|------|------|------|----------|----------|
| 6 | rs660550   | 31837277 | C | 0.37 | 0.44 | A | 0.77 | 0.70 | 0.85 | 4.94E-08 | 5.10E-08 |
| 6 | rs577272   | 31837963 | G | 0.37 | 0.44 | A | 0.77 | 0.70 | 0.85 | 4.33E-08 | 4.33E-08 |
| 6 | rs644827   | 31838441 | T | 0.37 | 0.44 | C | 0.77 | 0.70 | 0.84 | 2.51E-08 | 2.46E-08 |
| 6 | rs494620   | 31838713 | A | 0.46 | 0.42 | G | 1.18 | 1.08 | 1.30 | 4.51E-04 | 5.52E-04 |
| 6 | rs2242665  | 31839309 | G | 0.37 | 0.44 | A | 0.77 | 0.70 | 0.85 | 4.13E-08 | 4.15E-08 |
| 6 | rs614549   | 31840625 | C | 0.40 | 0.38 | T | 1.13 | 1.03 | 1.24 | 1.37E-02 | 1.60E-02 |
| 6 | rs2736428  | 31843924 | A | 0.37 | 0.34 | G | 1.14 | 1.03 | 1.25 | 8.95E-03 | 1.18E-02 |
| 6 | rs9267658  | 31845985 | T | 0.11 | 0.14 | C | 0.77 | 0.67 | 0.88 | 2.30E-04 | 3.68E-04 |
| 6 | rs9267659  | 31846234 | A | 0.17 | 0.21 | G | 0.78 | 0.69 | 0.88 | 3.73E-05 | 4.37E-05 |
| 6 | rs652888   | 31851234 | C | 0.18 | 0.20 | T | 0.89 | 0.79 | 1.00 | 5.52E-02 | 5.11E-02 |
| 6 | rs7743807  | 31854543 | T | 0.04 | 0.04 | C | 0.96 | 0.76 | 1.21 | 7.13E-01 | 7.60E-01 |
| 6 | rs35875104 | 31856294 | C | 0.04 | 0.03 | T | 1.50 | 1.17 | 1.91 | 1.33E-03 | 1.76E-03 |
| 6 | rs9501159  | 31860118 | A | 0.01 | 0.01 | G | 1.18 | 0.77 | 1.79 | 4.49E-01 | 5.42E-01 |
| 6 | rs9267661  | 31860576 | T | 0.01 | 0.02 | C | 0.90 | 0.61 | 1.32 | 5.82E-01 | 5.71E-01 |
| 6 | rs659445   | 31864304 | C | 0.27 | 0.32 | T | 0.80 | 0.72 | 0.89 | 2.43E-05 | 2.98E-05 |
| 6 | rs2844456  | 31864674 | G | 0.08 | 0.05 | A | 1.70 | 1.40 | 2.05 | 5.14E-08 | 3.25E-08 |
| 6 | rs9469069  | 31866418 | G | 0.03 | 0.03 | A | 0.88 | 0.67 | 1.16 | 3.71E-01 | 4.06E-01 |
| 6 | rs9267663  | 31867253 | T | 0.03 | 0.03 | C | 0.82 | 0.62 | 1.08 | 1.57E-01 | 1.47E-01 |
| 6 | rs558702   | 31870326 | T | 0.08 | 0.10 | C | 0.84 | 0.72 | 0.99 | 3.31E-02 | 3.55E-02 |
| 6 | rs9267665  | 31870856 | T | 0.03 | 0.03 | C | 0.84 | 0.64 | 1.10 | 2.03E-01 | 1.89E-01 |
| 6 | rs6939227  | 31870873 | A | 0.04 | 0.04 | C | 0.96 | 0.77 | 1.21 | 7.52E-01 | 8.06E-01 |
| 6 | rs2763982  | 31872551 | C | 0.40 | 0.36 | G | 1.17 | 1.07 | 1.29 | 1.11E-03 | 1.38E-03 |
| 6 | rs519417   | 31878433 | A | 0.08 | 0.10 | G | 0.83 | 0.71 | 0.98 | 2.55E-02 | 2.73E-02 |
| 6 | rs3128761  | 31879158 | A | 0.11 | 0.14 | T | 0.77 | 0.67 | 0.89 | 2.41E-04 | 3.97E-04 |
| 6 | rs28435656 | 31880637 | A | 0.13 | 0.17 | G | 0.74 | 0.65 | 0.84 | 5.22E-06 | 8.21E-06 |
| 6 | rs17201403 | 31888062 | A | 0.02 | 0.01 | G | 1.40 | 0.97 | 2.02 | 6.84E-02 | 8.85E-02 |
| 6 | rs3130683  | 31888367 | C | 0.11 | 0.14 | T | 0.77 | 0.67 | 0.89 | 2.99E-04 | 5.21E-04 |
| 6 | rs497309   | 31892484 | G | 0.08 | 0.10 | T | 0.82 | 0.70 | 0.97 | 1.77E-02 | 1.89E-02 |
| 6 | rs2734335  | 31893944 | C | 0.45 | 0.49 | T | 0.85 | 0.78 | 0.93 | 5.72E-04 | 7.81E-04 |
| 6 | rs9332702  | 31894818 | G | 0.02 | 0.01 | C | 1.53 | 1.07 | 2.18 | 1.87E-02 | 1.61E-02 |
| 6 | rs9332704  | 31895619 | T | 0.02 | 0.01 | G | 1.26 | 0.88 | 1.79 | 2.11E-01 | 2.59E-01 |
| 6 | rs1042663  | 31905130 | A | 0.11 | 0.09 | G | 1.26 | 1.08 | 1.47 | 2.76E-03 | 2.00E-03 |
| 6 | rs550605   | 31907147 | C | 0.11 | 0.09 | T | 1.26 | 1.08 | 1.46 | 2.98E-03 | 2.13E-03 |
| 6 | rs638383   | 31908224 | A | 0.04 | 0.04 | G | 0.95 | 0.76 | 1.19 | 6.55E-01 | 7.10E-01 |

|   |            |          |   |      |      |   |      |      |      |          |          |
|---|------------|----------|---|------|------|---|------|------|------|----------|----------|
| 6 | rs497239   | 31908761 | C | 0.11 | 0.09 | T | 1.26 | 1.08 | 1.46 | 3.21E-03 | 2.31E-03 |
| 6 | rs547154   | 31910938 | A | 0.11 | 0.09 | C | 1.27 | 1.09 | 1.48 | 1.88E-03 | 1.38E-03 |
| 6 | rs9332730  | 31912009 | C | 0.03 | 0.04 | G | 0.82 | 0.64 | 1.06 | 1.37E-01 | 1.21E-01 |
| 6 | rs512559   | 31916062 | C | 0.04 | 0.04 | T | 0.95 | 0.75 | 1.19 | 6.38E-01 | 6.94E-01 |
| 6 | rs537160   | 31916400 | T | 0.27 | 0.32 | C | 0.80 | 0.72 | 0.89 | 1.51E-05 | 2.70E-05 |
| 6 | rs541862   | 31916951 | G | 0.11 | 0.09 | A | 1.26 | 1.08 | 1.47 | 2.55E-03 | 1.86E-03 |
| 6 | rs4151657  | 31917540 | C | 0.39 | 0.35 | T | 1.17 | 1.06 | 1.29 | 1.17E-03 | 2.14E-03 |
| 6 | rs1270942  | 31918860 | C | 0.08 | 0.10 | T | 0.82 | 0.70 | 0.97 | 1.90E-02 | 2.11E-02 |
| 6 | rs2072633  | 31919578 | T | 0.40 | 0.43 | C | 0.88 | 0.80 | 0.97 | 7.79E-03 | 1.38E-02 |
| 6 | rs4151672  | 31919830 | T | 0.05 | 0.05 | C | 0.96 | 0.78 | 1.19 | 7.09E-01 | 7.29E-01 |
| 6 | rs4151664  | 31920873 | T | 0.05 | 0.05 | C | 0.98 | 0.79 | 1.20 | 8.14E-01 | 7.55E-01 |
| 6 | rs630379   | 31922254 | T | 0.22 | 0.28 | G | 0.73 | 0.66 | 0.81 | 1.23E-08 | 2.09E-08 |
| 6 | rs34555781 | 31925697 | C | 0.04 | 0.04 | A | 0.86 | 0.68 | 1.10 | 2.26E-01 | 2.61E-01 |
| 6 | rs17201466 | 31926600 | T | 0.03 | 0.03 | C | 0.73 | 0.55 | 0.96 | 2.60E-02 | 1.86E-02 |
| 6 | rs438999   | 31928306 | C | 0.11 | 0.09 | T | 1.27 | 1.09 | 1.48 | 1.88E-03 | 1.33E-03 |
| 6 | rs437179   | 31929014 | T | 0.22 | 0.28 | G | 0.73 | 0.66 | 0.81 | 9.40E-09 | 1.43E-08 |
| 6 | rs592229   | 31930441 | G | 0.41 | 0.44 | T | 0.87 | 0.79 | 0.96 | 3.46E-03 | 5.73E-03 |
| 6 | rs429608   | 31930462 | A | 0.18 | 0.15 | G | 1.22 | 1.08 | 1.38 | 1.17E-03 | 7.72E-04 |
| 6 | rs406936   | 31933161 | T | 0.15 | 0.13 | C | 1.16 | 1.02 | 1.32 | 2.84E-02 | 2.00E-02 |
| 6 | rs492899   | 31933518 | G | 0.07 | 0.08 | A | 0.84 | 0.71 | 1.00 | 4.80E-02 | 2.89E-02 |
| 6 | rs454212   | 31934372 | A | 0.15 | 0.13 | G | 1.18 | 1.03 | 1.35 | 1.37E-02 | 8.92E-03 |
| 6 | rs453821   | 31935311 | A | 0.15 | 0.13 | G | 1.16 | 1.02 | 1.32 | 2.73E-02 | 1.93E-02 |
| 6 | rs13217120 | 31935928 | C | 0.03 | 0.04 | G | 0.85 | 0.67 | 1.09 | 2.09E-01 | 2.38E-01 |
| 6 | rs416002   | 31938635 | G | 0.04 | 0.04 | C | 0.93 | 0.74 | 1.17 | 5.14E-01 | 5.53E-01 |
| 6 | rs389884   | 31940897 | C | 0.08 | 0.10 | T | 0.82 | 0.70 | 0.96 | 1.54E-02 | 1.72E-02 |
| 6 | rs387608   | 31941557 | T | 0.15 | 0.13 | C | 1.15 | 1.01 | 1.32 | 3.47E-02 | 2.50E-02 |
| 6 | rs6941112  | 31946614 | A | 0.36 | 0.32 | G | 1.17 | 1.06 | 1.29 | 1.50E-03 | 2.52E-03 |
| 6 | rs386480   | 31946837 | G | 0.22 | 0.28 | C | 0.72 | 0.65 | 0.81 | 3.50E-09 | 4.91E-09 |
| 6 | rs389883   | 31947460 | C | 0.22 | 0.28 | A | 0.72 | 0.65 | 0.80 | 2.80E-09 | 3.95E-09 |
| 6 | rs389512   | 31947594 | G | 0.15 | 0.13 | C | 1.15 | 1.01 | 1.31 | 4.00E-02 | 2.84E-02 |
| 6 | rs6455     | 32006896 | C | 0.01 | 0.02 | G | 0.56 | 0.38 | 0.83 | 3.02E-03 | 1.90E-03 |
| 6 | rs34214527 | 32014456 | T | 0.10 | 0.08 | C | 1.30 | 1.11 | 1.52 | 1.24E-03 | 1.37E-03 |
| 6 | rs2856448  | 32014575 | T | 0.41 | 0.49 | C | 0.73 | 0.66 | 0.80 | 1.08E-11 | 1.13E-11 |
| 6 | rs12333245 | 32019769 | A | 0.11 | 0.09 | G | 1.22 | 1.05 | 1.41 | 1.01E-02 | 8.54E-03 |

|   |            |          |   |      |      |   |      |      |      |          |          |
|---|------------|----------|---|------|------|---|------|------|------|----------|----------|
| 6 | rs34562262 | 32020961 | C | 0.08 | 0.04 | G | 1.78 | 1.47 | 2.16 | 3.60E-09 | 2.12E-09 |
| 6 | rs11969759 | 32021130 | T | 0.05 | 0.06 | C | 0.79 | 0.64 | 0.97 | 2.32E-02 | 1.60E-02 |
| 6 | rs12198173 | 32026808 | A | 0.10 | 0.08 | G | 1.25 | 1.07 | 1.47 | 4.55E-03 | 5.13E-03 |
| 6 | rs2269429  | 32029183 | A | 0.11 | 0.09 | G | 1.20 | 1.03 | 1.40 | 1.64E-02 | 1.42E-02 |
| 6 | rs2239689  | 32030284 | T | 0.37 | 0.33 | C | 1.19 | 1.08 | 1.31 | 4.43E-04 | 5.41E-04 |
| 6 | rs7766862  | 32033007 | A | 0.37 | 0.33 | G | 1.19 | 1.08 | 1.31 | 4.61E-04 | 5.67E-04 |
| 6 | rs17207923 | 32036788 | T | 0.02 | 0.02 | C | 0.77 | 0.55 | 1.09 | 1.39E-01 | 1.47E-01 |
| 6 | rs1150755  | 32038550 | A | 0.13 | 0.14 | G | 0.87 | 0.76 | 0.99 | 4.14E-02 | 4.77E-02 |
| 6 | rs2071295  | 32038700 | A | 0.37 | 0.33 | G | 1.19 | 1.09 | 1.32 | 2.93E-04 | 3.66E-04 |
| 6 | rs204878   | 32045226 | T | 0.05 | 0.05 | A | 0.98 | 0.80 | 1.22 | 8.80E-01 | 9.22E-01 |
| 6 | rs7774197  | 32046275 | C | 0.05 | 0.06 | A | 0.79 | 0.64 | 0.97 | 2.45E-02 | 1.71E-02 |
| 6 | rs17201560 | 32047268 | C | 0.04 | 0.04 | T | 1.01 | 0.81 | 1.27 | 9.01E-01 | 8.73E-01 |
| 6 | rs185819   | 32050067 | T | 0.42 | 0.49 | C | 0.73 | 0.67 | 0.81 | 4.83E-11 | 5.87E-11 |
| 6 | rs1150754  | 32050758 | A | 0.13 | 0.14 | G | 0.86 | 0.75 | 0.99 | 3.39E-02 | 3.87E-02 |
| 6 | rs34878747 | 32052898 | T | 0.05 | 0.05 | C | 0.91 | 0.74 | 1.14 | 4.24E-01 | 4.18E-01 |
| 6 | rs169496   | 32052983 | A | 0.11 | 0.09 | G | 1.23 | 1.06 | 1.42 | 7.29E-03 | 6.29E-03 |
| 6 | rs204899   | 32057627 | A | 0.11 | 0.09 | G | 1.22 | 1.05 | 1.42 | 8.69E-03 | 7.80E-03 |
| 6 | rs17201595 | 32058425 | C | 0.02 | 0.02 | G | 0.92 | 0.68 | 1.25 | 5.88E-01 | 6.01E-01 |
| 6 | rs1150753  | 32059867 | C | 0.08 | 0.10 | T | 0.82 | 0.69 | 0.96 | 1.39E-02 | 1.51E-02 |
| 6 | rs2071293  | 32062687 | T | 0.35 | 0.32 | C | 1.19 | 1.08 | 1.31 | 5.27E-04 | 6.57E-04 |
| 6 | rs13199524 | 32066765 | T | 0.10 | 0.08 | C | 1.27 | 1.09 | 1.49 | 2.61E-03 | 2.98E-03 |
| 6 | rs3096695  | 32069806 | G | 0.10 | 0.14 | C | 0.74 | 0.64 | 0.85 | 2.62E-05 | 4.49E-05 |
| 6 | rs1269854  | 32070838 | G | 0.05 | 0.05 | A | 1.00 | 0.81 | 1.23 | 9.66E-01 | 9.84E-01 |
| 6 | rs3134954  | 32071893 | G | 0.11 | 0.14 | A | 0.75 | 0.65 | 0.86 | 3.88E-05 | 5.76E-05 |
| 6 | rs393544   | 32074518 | C | 0.04 | 0.04 | G | 0.94 | 0.75 | 1.17 | 5.72E-01 | 6.08E-01 |
| 6 | rs12153855 | 32074804 | C | 0.12 | 0.10 | T | 1.18 | 1.02 | 1.36 | 2.62E-02 | 3.07E-02 |
| 6 | rs2269426  | 32076499 | T | 0.44 | 0.39 | C | 1.24 | 1.13 | 1.37 | 4.36E-06 | 7.79E-06 |
| 6 | rs17207986 | 32079567 | C | 0.05 | 0.06 | T | 0.88 | 0.72 | 1.08 | 2.26E-01 | 2.35E-01 |
| 6 | rs3130342  | 32080146 | T | 0.11 | 0.14 | G | 0.74 | 0.64 | 0.85 | 2.04E-05 | 3.21E-05 |
| 6 | rs9469084  | 32080383 | T | 0.10 | 0.07 | C | 1.37 | 1.16 | 1.61 | 1.50E-04 | 1.10E-04 |
| 6 | rs8111     | 32083175 | A | 0.32 | 0.29 | G | 1.18 | 1.07 | 1.30 | 1.08E-03 | 1.51E-03 |
| 6 | rs8283     | 32083300 | C | 0.22 | 0.18 | T | 1.28 | 1.15 | 1.44 | 1.48E-05 | 1.40E-05 |
| 6 | rs28732175 | 32085278 | T | 0.04 | 0.04 | C | 1.02 | 0.79 | 1.30 | 9.08E-01 | 9.69E-01 |
| 6 | rs2228628  | 32088854 | G | 0.33 | 0.30 | C | 1.19 | 1.08 | 1.31 | 6.33E-04 | 9.10E-04 |



|   |            |          |   |      |      |   |      |      |      |          |          |
|---|------------|----------|---|------|------|---|------|------|------|----------|----------|
| 6 | rs35580488 | 32097421 | C | 0.03 | 0.01 | G | 2.51 | 1.78 | 3.54 | 6.53E-08 | 6.50E-08 |
| 6 | rs9267803  | 32101762 | T | 0.32 | 0.29 | C | 1.17 | 1.06 | 1.29 | 2.18E-03 | 3.08E-03 |
| 6 | rs13211318 | 32102680 | C | 0.12 | 0.10 | A | 1.18 | 1.02 | 1.36 | 2.96E-02 | 3.48E-02 |
| 6 | rs4713505  | 32105001 | T | 0.34 | 0.30 | G | 1.18 | 1.07 | 1.30 | 8.68E-04 | 1.28E-03 |
| 6 | rs388629   | 32105512 | T | 0.05 | 0.05 | C | 0.98 | 0.79 | 1.20 | 8.15E-01 | 8.00E-01 |
| 6 | rs204999   | 32109979 | G | 0.26 | 0.27 | A | 0.99 | 0.89 | 1.09 | 7.80E-01 | 7.55E-01 |
| 6 | rs9296009  | 32114515 | T | 0.23 | 0.21 | A | 1.13 | 1.01 | 1.26 | 2.83E-02 | 2.37E-02 |
| 6 | rs28732178 | 32115222 | A | 0.05 | 0.05 | G | 1.05 | 0.84 | 1.31 | 6.63E-01 | 7.05E-01 |
| 6 | rs1053924  | 32120715 | A | 0.26 | 0.31 | G | 0.78 | 0.70 | 0.86 | 1.68E-06 | 2.27E-06 |
| 6 | rs9267810  | 32121594 | C | 0.26 | 0.25 | T | 1.02 | 0.92 | 1.13 | 7.19E-01 | 8.04E-01 |
| 6 | rs505997   | 32121932 | A | 0.04 | 0.04 | G | 0.93 | 0.74 | 1.17 | 5.25E-01 | 5.71E-01 |
| 6 | rs2269425  | 32123639 | T | 0.13 | 0.14 | C | 0.85 | 0.74 | 0.97 | 1.63E-02 | 1.56E-02 |
| 6 | rs3134603  | 32126002 | T | 0.11 | 0.14 | C | 0.74 | 0.65 | 0.86 | 4.28E-05 | 6.50E-05 |
| 6 | rs34129552 | 32130329 | G | 0.02 | 0.03 | C | 0.83 | 0.63 | 1.11 | 2.08E-01 | 1.36E-01 |
| 6 | rs2269424  | 32132233 | T | 0.26 | 0.25 | C | 1.01 | 0.91 | 1.12 | 8.19E-01 | 9.12E-01 |
| 6 | rs3096697  | 32134510 | T | 0.20 | 0.20 | C | 0.99 | 0.89 | 1.12 | 9.24E-01 | 9.12E-01 |
| 6 | rs3130347  | 32134656 | C | 0.20 | 0.20 | T | 1.00 | 0.89 | 1.12 | 9.63E-01 | 9.54E-01 |
| 6 | rs205000   | 32135878 | G | 0.01 | 0.01 | C | 0.76 | 0.48 | 1.19 | 2.25E-01 | 2.18E-01 |
| 6 | rs11553430 | 32136771 | A | 0.03 | 0.02 | G | 1.16 | 0.87 | 1.54 | 3.06E-01 | 2.81E-01 |
| 6 | rs3130283  | 32138545 | A | 0.11 | 0.14 | C | 0.74 | 0.64 | 0.85 | 2.58E-05 | 4.05E-05 |
| 6 | rs34280838 | 32139565 | C | 0.02 | 0.03 | T | 0.84 | 0.62 | 1.14 | 2.57E-01 | 1.86E-01 |
| 6 | rs3130284  | 32140487 | C | 0.20 | 0.20 | T | 0.99 | 0.89 | 1.11 | 9.10E-01 | 8.99E-01 |
| 6 | rs408359   | 32141883 | T | 0.08 | 0.07 | C | 1.27 | 1.07 | 1.51 | 6.88E-03 | 8.56E-03 |
| 6 | rs3134947  | 32145205 | A | 0.20 | 0.20 | G | 0.99 | 0.89 | 1.11 | 9.19E-01 | 9.11E-01 |
| 6 | rs2269423  | 32145707 | T | 0.34 | 0.38 | G | 0.82 | 0.75 | 0.91 | 5.97E-05 | 9.54E-05 |
| 6 | rs3134945  | 32146492 | T | 0.20 | 0.20 | G | 0.99 | 0.89 | 1.11 | 8.90E-01 | 8.82E-01 |
| 6 | rs3130349  | 32147696 | A | 0.16 | 0.17 | G | 0.95 | 0.84 | 1.08 | 4.59E-01 | 4.50E-01 |
| 6 | rs3134943  | 32147761 | A | 0.11 | 0.14 | G | 0.77 | 0.67 | 0.88 | 1.57E-04 | 2.72E-04 |
| 6 | rs3134940  | 32149816 | G | 0.16 | 0.17 | A | 0.95 | 0.84 | 1.08 | 4.55E-01 | 4.46E-01 |
| 6 | rs1035798  | 32151222 | T | 0.25 | 0.25 | C | 1.01 | 0.91 | 1.12 | 8.58E-01 | 9.56E-01 |
| 6 | rs2070600  | 32151443 | A | 0.08 | 0.05 | G | 1.77 | 1.47 | 2.13 | 1.03E-09 | 5.63E-10 |
| 6 | rs1800624  | 32152387 | A | 0.25 | 0.25 | T | 1.01 | 0.91 | 1.12 | 8.28E-01 | 9.26E-01 |
| 6 | rs204995   | 32154285 | C | 0.22 | 0.23 | T | 0.98 | 0.88 | 1.10 | 7.30E-01 | 7.37E-01 |
| 6 | rs204994   | 32154998 | A | 0.21 | 0.21 | G | 0.96 | 0.86 | 1.07 | 4.49E-01 | 4.61E-01 |

|   |            |          |   |      |      |   |      |      |      |          |          |
|---|------------|----------|---|------|------|---|------|------|------|----------|----------|
| 6 | rs204993   | 32155581 | C | 0.29 | 0.27 | T | 1.12 | 1.01 | 1.24 | 2.73E-02 | 2.53E-02 |
| 6 | rs2856437  | 32157364 | T | 0.08 | 0.05 | C | 1.66 | 1.39 | 2.00 | 4.18E-08 | 3.76E-08 |
| 6 | rs176095   | 32158319 | C | 0.21 | 0.21 | T | 0.95 | 0.85 | 1.07 | 4.21E-01 | 4.40E-01 |
| 6 | rs12663103 | 32161324 | C | 0.06 | 0.06 | T | 1.17 | 0.96 | 1.41 | 1.19E-01 | 1.44E-01 |
| 6 | rs204991   | 32161366 | G | 0.18 | 0.19 | A | 0.97 | 0.86 | 1.09 | 5.98E-01 | 6.32E-01 |
| 6 | rs204990   | 32161430 | T | 0.18 | 0.19 | G | 0.97 | 0.86 | 1.09 | 6.02E-01 | 6.36E-01 |
| 6 | rs8192583  | 32163274 | T | 0.05 | 0.05 | C | 1.09 | 0.87 | 1.35 | 4.65E-01 | 5.03E-01 |
| 6 | rs8192576  | 32165300 | C | 0.02 | 0.02 | T | 1.41 | 1.02 | 1.95 | 3.71E-02 | 4.27E-02 |
| 6 | rs2114437  | 32166380 | C | 0.05 | 0.05 | G | 1.08 | 0.87 | 1.35 | 4.67E-01 | 5.06E-01 |
| 6 | rs8192575  | 32166384 | C | 0.09 | 0.06 | G | 1.43 | 1.20 | 1.70 | 5.82E-05 | 5.44E-05 |
| 6 | rs3134942  | 32168771 | A | 0.11 | 0.12 | C | 0.89 | 0.77 | 1.03 | 1.27E-01 | 1.36E-01 |
| 6 | rs204987   | 32168932 | A | 0.03 | 0.03 | G | 0.97 | 0.75 | 1.25 | 7.92E-01 | 8.32E-01 |
| 6 | rs28986321 | 32170980 | A | 0.02 | 0.03 | C | 0.80 | 0.59 | 1.08 | 1.42E-01 | 1.40E-01 |
| 6 | rs2071277  | 32171683 | G | 0.48 | 0.49 | A | 0.99 | 0.91 | 1.09 | 8.71E-01 | 7.74E-01 |
| 6 | rs3131296  | 32172993 | A | 0.11 | 0.12 | G | 0.90 | 0.78 | 1.04 | 1.37E-01 | 1.47E-01 |
| 6 | rs3130292  | 32176208 | C | 0.20 | 0.19 | G | 1.04 | 0.93 | 1.17 | 4.72E-01 | 5.00E-01 |
| 6 | rs206017   | 32176211 | G | 0.37 | 0.40 | A | 0.90 | 0.82 | 0.98 | 2.25E-02 | 2.76E-02 |
| 6 | rs9267833  | 32177900 | C | 0.26 | 0.26 | T | 0.96 | 0.86 | 1.06 | 4.13E-01 | 3.43E-01 |
| 6 | rs2071286  | 32179896 | A | 0.21 | 0.21 | G | 0.97 | 0.87 | 1.08 | 5.76E-01 | 4.65E-01 |
| 6 | rs206019   | 32180241 | T | 0.14 | 0.11 | C | 1.31 | 1.14 | 1.51 | 1.30E-04 | 9.47E-05 |
| 6 | rs206015   | 32182759 | T | 0.14 | 0.11 | C | 1.28 | 1.12 | 1.47 | 3.74E-04 | 2.73E-04 |
| 6 | rs404860   | 32184345 | C | 0.20 | 0.17 | T | 1.25 | 1.11 | 1.41 | 2.03E-04 | 1.80E-04 |
| 6 | rs3134798  | 32184705 | C | 0.22 | 0.27 | T | 0.77 | 0.69 | 0.85 | 1.25E-06 | 2.03E-06 |
| 6 | rs2854050  | 32185605 | T | 0.09 | 0.06 | C | 1.48 | 1.25 | 1.76 | 7.77E-06 | 7.43E-06 |
| 6 | rs8192591  | 32185796 | A | 0.04 | 0.04 | G | 1.01 | 0.78 | 1.29 | 9.68E-01 | 1.00E+00 |
| 6 | rs436388   | 32186264 | T | 0.37 | 0.39 | C | 0.92 | 0.83 | 1.01 | 6.68E-02 | 8.17E-02 |
| 6 | rs2256594  | 32186872 | C | 0.20 | 0.17 | T | 1.25 | 1.11 | 1.41 | 2.24E-04 | 2.05E-04 |
| 6 | rs394657   | 32187023 | G | 0.43 | 0.44 | A | 0.95 | 0.87 | 1.05 | 3.17E-01 | 2.69E-01 |
| 6 | rs1109771  | 32187605 | A | 0.44 | 0.46 | G | 0.94 | 0.85 | 1.03 | 1.75E-01 | 2.18E-01 |
| 6 | rs422951   | 32188383 | G | 0.42 | 0.44 | A | 0.92 | 0.84 | 1.01 | 8.87E-02 | 6.46E-02 |
| 6 | rs8192585  | 32188823 | T | 0.05 | 0.04 | C | 1.05 | 0.84 | 1.30 | 6.89E-01 | 6.72E-01 |
| 6 | rs415929   | 32189032 | G | 0.31 | 0.32 | A | 0.97 | 0.88 | 1.07 | 5.37E-01 | 4.23E-01 |
| 6 | rs8192584  | 32189192 | T | 0.05 | 0.03 | C | 1.97 | 1.55 | 2.49 | 1.23E-08 | 1.11E-08 |
| 6 | rs3132946  | 32190028 | A | 0.10 | 0.14 | G | 0.71 | 0.61 | 0.82 | 2.66E-06 | 4.88E-06 |

|   |            |          |   |      |      |   |      |      |      |          |          |
|---|------------|----------|---|------|------|---|------|------|------|----------|----------|
| 6 | rs443198   | 32190406 | C | 0.40 | 0.37 | T | 1.13 | 1.03 | 1.24 | 1.22E-02 | 1.10E-02 |
| 6 | rs3134931  | 32190620 | G | 0.32 | 0.32 | A | 1.00 | 0.91 | 1.11 | 9.87E-01 | 9.29E-01 |
| 6 | rs434841   | 32191041 | A | 0.27 | 0.30 | G | 0.87 | 0.78 | 0.96 | 6.18E-03 | 4.43E-03 |
| 6 | rs3830041  | 32191339 | A | 0.11 | 0.09 | G | 1.26 | 1.09 | 1.47 | 2.59E-03 | 3.82E-03 |
| 6 | rs375244   | 32191457 | A | 0.23 | 0.23 | G | 0.99 | 0.88 | 1.10 | 7.98E-01 | 6.26E-01 |
| 6 | rs8192565  | 32191607 | A | 0.07 | 0.09 | G | 0.76 | 0.64 | 0.90 | 1.70E-03 | 5.91E-04 |
| 6 | rs2267644  | 32192560 | A | 0.04 | 0.04 | G | 1.02 | 0.81 | 1.29 | 8.70E-01 | 8.00E-01 |
| 6 | rs479536   | 32193678 | T | 0.07 | 0.07 | C | 1.08 | 0.90 | 1.28 | 4.25E-01 | 3.94E-01 |
| 6 | rs9267845  | 32193698 | T | 0.39 | 0.39 | A | 1.00 | 0.91 | 1.10 | 9.42E-01 | 8.88E-01 |
| 6 | rs499691   | 32194339 | T | 0.23 | 0.20 | C | 1.17 | 1.05 | 1.31 | 5.36E-03 | 6.55E-03 |
| 6 | rs3096691  | 32194854 | A | 0.39 | 0.39 | G | 1.00 | 0.91 | 1.10 | 9.45E-01 | 8.85E-01 |
| 6 | rs483574   | 32194956 | T | 0.16 | 0.19 | C | 0.84 | 0.75 | 0.95 | 6.63E-03 | 3.56E-03 |
| 6 | rs482759   | 32195017 | C | 0.16 | 0.19 | T | 0.84 | 0.75 | 0.95 | 6.79E-03 | 3.53E-03 |
| 6 | rs532385   | 32195359 | T | 0.19 | 0.17 | C | 1.19 | 1.06 | 1.33 | 3.74E-03 | 5.01E-03 |
| 6 | rs9378123  | 32196864 | G | 0.15 | 0.13 | A | 1.19 | 1.04 | 1.35 | 1.10E-02 | 1.15E-02 |
| 6 | rs1426713  | 32198049 | A | 0.08 | 0.08 | G | 1.03 | 0.87 | 1.23 | 7.34E-01 | 7.00E-01 |
| 6 | rs404890   | 32198867 | T | 0.36 | 0.40 | G | 0.87 | 0.79 | 0.95 | 3.04E-03 | 1.93E-03 |
| 6 | rs2849015  | 32198936 | A | 0.36 | 0.40 | G | 0.87 | 0.79 | 0.95 | 2.89E-03 | 1.85E-03 |
| 6 | rs377763   | 32199144 | T | 0.17 | 0.19 | G | 0.88 | 0.78 | 0.99 | 3.25E-02 | 3.30E-02 |
| 6 | rs9267873  | 32199352 | C | 0.42 | 0.41 | T | 1.06 | 0.97 | 1.16 | 2.24E-01 | 1.63E-01 |
| 6 | rs6936346  | 32200754 | T | 0.30 | 0.32 | C | 0.91 | 0.82 | 1.01 | 6.73E-02 | 4.14E-02 |
| 6 | rs12182351 | 32201707 | C | 0.24 | 0.26 | T | 0.91 | 0.82 | 1.02 | 9.59E-02 | 6.48E-02 |
| 6 | rs9501398  | 32202597 | T | 0.08 | 0.08 | G | 1.04 | 0.88 | 1.24 | 6.43E-01 | 6.14E-01 |
| 6 | rs3130299  | 32203537 | G | 0.24 | 0.26 | A | 0.92 | 0.82 | 1.02 | 1.04E-01 | 7.09E-02 |
| 6 | rs693797   | 32204433 | G | 0.39 | 0.42 | A | 0.89 | 0.81 | 0.98 | 1.32E-02 | 9.66E-03 |
| 6 | rs549182   | 32205045 | A | 0.02 | 0.02 | G | 0.85 | 0.59 | 1.21 | 3.57E-01 | 2.99E-01 |
| 6 | rs9267911  | 32205110 | C | 0.42 | 0.45 | T | 0.86 | 0.79 | 0.95 | 1.78E-03 | 9.67E-04 |
| 6 | rs6906128  | 32206304 | C | 0.28 | 0.29 | A | 0.94 | 0.85 | 1.05 | 2.68E-01 | 2.11E-01 |
| 6 | rs511027   | 32206687 | A | 0.13 | 0.12 | T | 1.12 | 0.98 | 1.29 | 1.02E-01 | 9.27E-02 |
| 6 | rs3130304  | 32207181 | A | 0.20 | 0.22 | G | 0.88 | 0.79 | 0.99 | 3.22E-02 | 3.38E-02 |
| 6 | rs17208216 | 32208449 | G | 0.02 | 0.01 | C | 1.26 | 0.88 | 1.81 | 2.05E-01 | 2.05E-01 |
| 6 | rs382259   | 32209027 | G | 0.27 | 0.27 | A | 1.01 | 0.91 | 1.12 | 8.75E-01 | 9.89E-01 |
| 6 | rs507778   | 32209861 | A | 0.33 | 0.35 | G | 0.90 | 0.82 | 1.00 | 4.31E-02 | 3.09E-02 |
| 6 | rs377743   | 32211065 | T | 0.25 | 0.26 | C | 0.98 | 0.88 | 1.09 | 6.71E-01 | 5.42E-01 |

|   |            |          |   |      |      |   |      |      |      |          |          |
|---|------------|----------|---|------|------|---|------|------|------|----------|----------|
| 6 | rs412657   | 32211085 | C | 0.39 | 0.41 | A | 0.92 | 0.84 | 1.01 | 9.26E-02 | 6.73E-02 |
| 6 | rs9267947  | 32211218 | G | 0.43 | 0.44 | A | 0.98 | 0.89 | 1.08 | 6.99E-01 | 6.53E-01 |
| 6 | rs411326   | 32211317 | A | 0.25 | 0.26 | G | 0.94 | 0.85 | 1.05 | 2.91E-01 | 2.70E-01 |
| 6 | rs17576984 | 32212985 | T | 0.10 | 0.10 | C | 1.00 | 0.85 | 1.17 | 9.71E-01 | 9.33E-01 |
| 6 | rs9267956  | 32213638 | G | 0.45 | 0.40 | A | 1.21 | 1.11 | 1.33 | 4.29E-05 | 5.46E-05 |
| 6 | rs405875   | 32215188 | G | 0.49 | 0.45 | A | 1.19 | 1.09 | 1.30 | 2.07E-04 | 2.86E-04 |
| 6 | rs3115573  | 32218843 | C | 0.49 | 0.44 | T | 1.18 | 1.08 | 1.30 | 3.29E-04 | 4.62E-04 |
| 6 | rs9296015  | 32218989 | A | 0.17 | 0.18 | G | 0.92 | 0.81 | 1.04 | 1.74E-01 | 1.67E-01 |
| 6 | rs4959089  | 32219725 | G | 0.17 | 0.18 | A | 0.92 | 0.81 | 1.04 | 1.64E-01 | 1.57E-01 |
| 6 | rs9267992  | 32220397 | G | 0.10 | 0.14 | A | 0.68 | 0.59 | 0.79 | 2.00E-07 | 3.92E-07 |
| 6 | rs3130315  | 32220685 | A | 0.49 | 0.44 | G | 1.18 | 1.08 | 1.30 | 3.29E-04 | 4.62E-04 |
| 6 | rs3115570  | 32222706 | C | 0.49 | 0.45 | T | 1.18 | 1.08 | 1.30 | 3.37E-04 | 5.06E-04 |
| 6 | rs3130320  | 32223258 | T | 0.31 | 0.34 | C | 0.86 | 0.78 | 0.95 | 3.87E-03 | 5.47E-03 |
| 6 | rs28895018 | 32224378 | C | 0.09 | 0.06 | T | 1.66 | 1.40 | 1.97 | 5.53E-09 | 4.81E-09 |
| 6 | rs9268005  | 32224388 | C | 0.27 | 0.32 | A | 0.77 | 0.70 | 0.86 | 5.52E-07 | 8.34E-07 |
| 6 | rs9268013  | 32224828 | C | 0.21 | 0.20 | G | 1.07 | 0.95 | 1.20 | 2.85E-01 | 2.81E-01 |
| 6 | rs3132971  | 32230256 | G | 0.07 | 0.09 | T | 0.74 | 0.63 | 0.88 | 6.61E-04 | 7.54E-04 |
| 6 | rs9268055  | 32230608 | C | 0.22 | 0.21 | T | 1.08 | 0.96 | 1.21 | 1.93E-01 | 1.86E-01 |
| 6 | rs2395114  | 32233547 | G | 0.47 | 0.42 | A | 1.23 | 1.12 | 1.34 | 1.30E-05 | 1.60E-05 |
| 6 | rs3096681  | 32235177 | C | 0.22 | 0.21 | T | 1.08 | 0.96 | 1.21 | 1.93E-01 | 1.86E-01 |
| 6 | rs17201917 | 32235757 | G | 0.14 | 0.15 | A | 0.89 | 0.78 | 1.02 | 8.47E-02 | 8.16E-02 |
| 6 | rs6457527  | 32236976 | T | 0.04 | 0.05 | A | 0.84 | 0.67 | 1.06 | 1.46E-01 | 1.16E-01 |
| 6 | rs3096674  | 32238219 | A | 0.21 | 0.20 | G | 1.06 | 0.95 | 1.19 | 3.04E-01 | 2.99E-01 |
| 6 | rs3115557  | 32239651 | A | 0.21 | 0.20 | G | 1.06 | 0.95 | 1.19 | 3.00E-01 | 2.96E-01 |
| 6 | rs3130340  | 32244627 | C | 0.22 | 0.21 | T | 1.08 | 0.96 | 1.21 | 1.93E-01 | 1.86E-01 |
| 6 | rs9268103  | 32245370 | A | 0.13 | 0.17 | G | 0.74 | 0.65 | 0.84 | 3.63E-06 | 6.49E-06 |
| 6 | rs3115553  | 32245827 | A | 0.22 | 0.21 | G | 1.08 | 0.96 | 1.21 | 1.87E-01 | 1.81E-01 |
| 6 | rs3115552  | 32246156 | A | 0.22 | 0.21 | G | 1.09 | 0.97 | 1.22 | 1.54E-01 | 1.46E-01 |
| 6 | rs9268125  | 32252678 | C | 0.21 | 0.20 | T | 1.06 | 0.95 | 1.19 | 3.15E-01 | 3.12E-01 |
| 6 | rs9268131  | 32254452 | G | 0.21 | 0.20 | A | 1.06 | 0.95 | 1.19 | 3.06E-01 | 3.02E-01 |
| 6 | rs9268132  | 32254654 | G | 0.47 | 0.42 | A | 1.23 | 1.12 | 1.34 | 1.24E-05 | 1.57E-05 |
| 6 | rs9268135  | 32255230 | G | 0.21 | 0.20 | A | 1.07 | 0.95 | 1.20 | 2.51E-01 | 2.46E-01 |
| 6 | rs4711291  | 32256260 | G | 0.22 | 0.21 | C | 1.07 | 0.96 | 1.20 | 2.17E-01 | 2.13E-01 |
| 6 | rs926070   | 32257566 | C | 0.27 | 0.32 | T | 0.78 | 0.70 | 0.86 | 7.36E-07 | 1.14E-06 |

|   |            |          |   |      |      |   |      |      |      |          |          |
|---|------------|----------|---|------|------|---|------|------|------|----------|----------|
| 6 | rs742695   | 32258574 | T | 0.01 | 0.01 | C | 1.24 | 0.83 | 1.85 | 2.91E-01 | 2.73E-01 |
| 6 | rs17422727 | 32259923 | G | 0.14 | 0.15 | C | 0.89 | 0.78 | 1.02 | 9.29E-02 | 8.99E-02 |
| 6 | rs6935269  | 32260350 | C | 0.22 | 0.21 | T | 1.07 | 0.96 | 1.20 | 2.17E-01 | 2.10E-01 |
| 6 | rs7775397  | 32261252 | G | 0.07 | 0.09 | T | 0.74 | 0.62 | 0.88 | 5.00E-04 | 5.77E-04 |
| 6 | rs34498363 | 32261630 | A | 0.02 | 0.01 | G | 1.54 | 1.03 | 2.29 | 3.35E-02 | 3.24E-02 |
| 6 | rs4947338  | 32261653 | C | 0.01 | 0.01 | A | 1.24 | 0.83 | 1.85 | 2.91E-01 | 2.73E-01 |
| 6 | rs11970194 | 32264645 | T | 0.01 | 0.01 | C | 1.24 | 0.83 | 1.85 | 2.94E-01 | 2.76E-01 |
| 6 | rs11963003 | 32264825 | G | 0.01 | 0.01 | T | 1.24 | 0.83 | 1.85 | 2.92E-01 | 2.73E-01 |
| 6 | rs17422797 | 32265528 | T | 0.04 | 0.06 | C | 0.68 | 0.55 | 0.85 | 5.19E-04 | 3.92E-04 |
| 6 | rs28366174 | 32266490 | C | 0.08 | 0.08 | T | 1.11 | 0.93 | 1.32 | 2.45E-01 | 2.63E-01 |
| 6 | rs6906662  | 32266506 | A | 0.09 | 0.06 | G | 1.65 | 1.39 | 1.96 | 9.12E-09 | 8.09E-09 |
| 6 | rs7750783  | 32268080 | T | 0.21 | 0.20 | C | 1.07 | 0.96 | 1.20 | 2.41E-01 | 2.36E-01 |
| 6 | rs537757   | 32268501 | A | 0.47 | 0.42 | T | 1.23 | 1.12 | 1.34 | 1.24E-05 | 1.52E-05 |
| 6 | rs6909427  | 32268701 | G | 0.22 | 0.21 | T | 1.08 | 0.96 | 1.21 | 1.89E-01 | 1.82E-01 |
| 6 | rs28366175 | 32269578 | C | 0.07 | 0.07 | T | 1.01 | 0.84 | 1.21 | 9.29E-01 | 8.73E-01 |
| 6 | rs3864300  | 32271807 | T | 0.21 | 0.20 | G | 1.07 | 0.95 | 1.20 | 2.70E-01 | 2.64E-01 |
| 6 | rs6457536  | 32273765 | G | 0.21 | 0.20 | A | 1.07 | 0.95 | 1.19 | 2.79E-01 | 2.72E-01 |
| 6 | rs9268192  | 32277211 | T | 0.21 | 0.20 | C | 1.06 | 0.95 | 1.19 | 3.00E-01 | 2.95E-01 |
| 6 | rs9268200  | 32278670 | T | 0.21 | 0.20 | C | 1.07 | 0.95 | 1.19 | 2.83E-01 | 2.75E-01 |
| 6 | rs9268202  | 32279340 | T | 0.21 | 0.20 | C | 1.07 | 0.96 | 1.21 | 2.31E-01 | 2.28E-01 |
| 6 | rs9501173  | 32279902 | A | 0.04 | 0.04 | G | 0.94 | 0.75 | 1.18 | 5.76E-01 | 5.31E-01 |
| 6 | rs1018433  | 32281510 | A | 0.21 | 0.20 | T | 1.07 | 0.95 | 1.20 | 2.70E-01 | 2.60E-01 |
| 6 | rs547261   | 32282033 | T | 0.47 | 0.42 | C | 1.22 | 1.12 | 1.34 | 1.80E-05 | 2.27E-05 |
| 6 | rs6910071  | 32282854 | G | 0.26 | 0.22 | A | 1.26 | 1.13 | 1.40 | 2.28E-05 | 1.27E-05 |
| 6 | rs6915455  | 32283494 | A | 0.21 | 0.20 | G | 1.06 | 0.95 | 1.19 | 2.89E-01 | 2.83E-01 |
| 6 | rs9268219  | 32284108 | G | 0.06 | 0.09 | T | 0.70 | 0.58 | 0.84 | 1.23E-04 | 1.50E-04 |
| 6 | rs9268220  | 32284340 | T | 0.17 | 0.15 | C | 1.09 | 0.96 | 1.24 | 1.65E-01 | 1.48E-01 |
| 6 | rs498422   | 32286761 | C | 0.05 | 0.06 | A | 0.89 | 0.73 | 1.09 | 2.60E-01 | 2.25E-01 |
| 6 | rs547077   | 32289318 | C | 0.48 | 0.42 | T | 1.23 | 1.12 | 1.35 | 9.45E-06 | 1.19E-05 |
| 6 | rs570963   | 32289594 | C | 0.09 | 0.10 | T | 0.90 | 0.77 | 1.06 | 2.12E-01 | 1.71E-01 |
| 6 | rs9268235  | 32290208 | T | 0.07 | 0.09 | C | 0.73 | 0.62 | 0.87 | 3.66E-04 | 4.26E-04 |
| 6 | rs4279480  | 32290927 | G | 0.27 | 0.32 | T | 0.77 | 0.70 | 0.86 | 5.18E-07 | 8.00E-07 |
| 6 | rs485774   | 32290954 | C | 0.47 | 0.42 | T | 1.23 | 1.13 | 1.35 | 6.97E-06 | 9.06E-06 |
| 6 | rs742697   | 32291542 | C | 0.27 | 0.32 | T | 0.77 | 0.70 | 0.86 | 5.89E-07 | 9.04E-07 |

|   |            |          |   |      |      |   |      |      |      |          |          |
|---|------------|----------|---|------|------|---|------|------|------|----------|----------|
| 6 | rs525607   | 32292084 | A | 0.48 | 0.42 | G | 1.23 | 1.12 | 1.35 | 1.01E-05 | 1.23E-05 |
| 6 | rs552339   | 32292715 | T | 0.47 | 0.42 | C | 1.23 | 1.12 | 1.34 | 1.29E-05 | 1.60E-05 |
| 6 | rs533885   | 32293152 | C | 0.47 | 0.42 | T | 1.21 | 1.10 | 1.33 | 4.76E-05 | 5.48E-05 |
| 6 | rs476885   | 32294712 | C | 0.47 | 0.42 | T | 1.23 | 1.12 | 1.34 | 1.46E-05 | 1.73E-05 |
| 6 | rs9368713  | 32297337 | C | 0.47 | 0.42 | T | 1.22 | 1.12 | 1.34 | 1.51E-05 | 1.92E-05 |
| 6 | rs10484560 | 32298137 | A | 0.07 | 0.08 | G | 0.78 | 0.66 | 0.94 | 6.95E-03 | 5.07E-03 |
| 6 | rs9405090  | 32298372 | G | 0.47 | 0.42 | A | 1.23 | 1.12 | 1.34 | 1.28E-05 | 1.62E-05 |
| 6 | rs1003878  | 32299822 | T | 0.21 | 0.20 | C | 1.02 | 0.91 | 1.15 | 7.47E-01 | 7.47E-01 |
| 6 | rs1076712  | 32300152 | G | 0.32 | 0.34 | A | 0.93 | 0.85 | 1.03 | 1.76E-01 | 1.50E-01 |
| 6 | rs9366793  | 32301289 | C | 0.48 | 0.42 | T | 1.23 | 1.12 | 1.35 | 1.17E-05 | 1.44E-05 |
| 6 | rs16870056 | 32301630 | A | 0.01 | 0.01 | G | 0.53 | 0.32 | 0.90 | 1.60E-02 | 1.61E-02 |
| 6 | rs10807100 | 32303068 | A | 0.47 | 0.42 | G | 1.23 | 1.12 | 1.35 | 1.22E-05 | 1.54E-05 |
| 6 | rs6930681  | 32304031 | A | 0.47 | 0.42 | G | 1.23 | 1.12 | 1.34 | 1.28E-05 | 1.62E-05 |
| 6 | rs12526151 | 32304085 | G | 0.07 | 0.08 | A | 0.78 | 0.66 | 0.94 | 7.04E-03 | 5.15E-03 |
| 6 | rs926594   | 32305370 | C | 0.47 | 0.42 | A | 1.23 | 1.12 | 1.34 | 1.27E-05 | 1.61E-05 |
| 6 | rs3817982  | 32306262 | G | 0.47 | 0.42 | A | 1.23 | 1.12 | 1.34 | 1.28E-05 | 1.62E-05 |
| 6 | rs28732193 | 32306922 | C | 0.04 | 0.04 | T | 1.00 | 0.78 | 1.28 | 9.86E-01 | 1.00E+00 |
| 6 | rs2022533  | 32307260 | C | 0.48 | 0.42 | A | 1.23 | 1.12 | 1.35 | 1.00E-05 | 1.23E-05 |
| 6 | rs1033498  | 32307869 | G | 0.47 | 0.42 | A | 1.22 | 1.12 | 1.34 | 1.63E-05 | 1.98E-05 |
| 6 | rs9469099  | 32308908 | A | 0.02 | 0.03 | G | 0.76 | 0.56 | 1.04 | 8.30E-02 | 8.50E-02 |
| 6 | rs3117137  | 32309911 | A | 0.21 | 0.20 | G | 1.02 | 0.91 | 1.15 | 6.86E-01 | 6.84E-01 |
| 6 | rs3132954  | 32311459 | T | 0.38 | 0.39 | C | 0.99 | 0.90 | 1.09 | 7.77E-01 | 7.07E-01 |
| 6 | rs6904320  | 32312082 | A | 0.20 | 0.24 | G | 0.81 | 0.73 | 0.91 | 2.47E-04 | 4.54E-04 |
| 6 | rs3117134  | 32313550 | G | 0.32 | 0.34 | A | 0.94 | 0.85 | 1.03 | 1.93E-01 | 1.64E-01 |
| 6 | rs3117133  | 32313653 | C | 0.20 | 0.24 | G | 0.81 | 0.73 | 0.91 | 2.66E-04 | 4.83E-04 |
| 6 | rs910049   | 32315727 | A | 0.20 | 0.24 | G | 0.83 | 0.74 | 0.92 | 7.58E-04 | 1.36E-03 |
| 6 | rs3117120  | 32316804 | G | 0.32 | 0.34 | C | 0.93 | 0.85 | 1.03 | 1.71E-01 | 1.44E-01 |
| 6 | rs2076537  | 32317635 | T | 0.32 | 0.34 | C | 0.93 | 0.85 | 1.03 | 1.74E-01 | 1.47E-01 |
| 6 | rs761187   | 32318036 | C | 0.46 | 0.41 | T | 1.23 | 1.12 | 1.34 | 1.51E-05 | 1.62E-05 |
| 6 | rs1265763  | 32319364 | A | 0.16 | 0.18 | G | 0.83 | 0.74 | 0.94 | 3.24E-03 | 1.87E-03 |
| 6 | rs2395148  | 32321554 | T | 0.02 | 0.03 | G | 0.76 | 0.56 | 1.03 | 7.40E-02 | 7.58E-02 |
| 6 | rs1265761  | 32321597 | C | 0.04 | 0.05 | T | 0.82 | 0.66 | 1.03 | 8.65E-02 | 6.93E-02 |
| 6 | rs1265760  | 32321872 | A | 0.36 | 0.42 | G | 0.77 | 0.70 | 0.85 | 5.37E-08 | 6.02E-08 |
| 6 | rs1265759  | 32322393 | G | 0.36 | 0.42 | A | 0.77 | 0.70 | 0.85 | 5.86E-08 | 6.75E-08 |

|   |            |          |   |      |      |   |      |      |      |          |          |
|---|------------|----------|---|------|------|---|------|------|------|----------|----------|
| 6 | rs1265758  | 32323529 | T | 0.35 | 0.41 | C | 0.76 | 0.70 | 0.84 | 1.97E-08 | 2.25E-08 |
| 6 | rs3129907  | 32323745 | G | 0.20 | 0.24 | A | 0.81 | 0.73 | 0.91 | 2.21E-04 | 4.24E-04 |
| 6 | rs6907322  | 32324945 | A | 0.15 | 0.18 | G | 0.81 | 0.71 | 0.92 | 1.13E-03 | 5.91E-04 |
| 6 | rs2894249  | 32325835 | C | 0.20 | 0.24 | T | 0.81 | 0.72 | 0.90 | 1.46E-04 | 2.68E-04 |
| 6 | rs2395150  | 32326045 | G | 0.35 | 0.41 | A | 0.76 | 0.70 | 0.84 | 1.87E-08 | 2.06E-08 |
| 6 | rs9268303  | 32326165 | A | 0.15 | 0.18 | G | 0.81 | 0.72 | 0.92 | 1.25E-03 | 6.65E-04 |
| 6 | rs9268326  | 32330153 | C | 0.47 | 0.42 | T | 1.23 | 1.12 | 1.34 | 1.28E-05 | 1.62E-05 |
| 6 | rs9268347  | 32331998 | A | 0.16 | 0.18 | G | 0.83 | 0.74 | 0.94 | 3.82E-03 | 2.21E-03 |
| 6 | rs3129922  | 32333098 | C | 0.36 | 0.42 | T | 0.77 | 0.70 | 0.85 | 6.03E-08 | 6.71E-08 |
| 6 | rs9268364  | 32333425 | T | 0.16 | 0.18 | C | 0.83 | 0.74 | 0.94 | 3.32E-03 | 1.91E-03 |
| 6 | rs9268365  | 32333439 | T | 0.16 | 0.18 | G | 0.83 | 0.73 | 0.94 | 3.33E-03 | 1.87E-03 |
| 6 | rs9268368  | 32333955 | C | 0.47 | 0.42 | T | 1.23 | 1.12 | 1.35 | 1.25E-05 | 1.61E-05 |
| 6 | rs7770048  | 32334754 | T | 0.11 | 0.13 | C | 0.83 | 0.72 | 0.96 | 9.64E-03 | 6.51E-03 |
| 6 | rs2073048  | 32335433 | T | 0.11 | 0.13 | C | 0.82 | 0.71 | 0.95 | 8.25E-03 | 5.54E-03 |
| 6 | rs3129934  | 32336187 | T | 0.13 | 0.17 | C | 0.73 | 0.64 | 0.84 | 2.92E-06 | 5.71E-06 |
| 6 | rs9268384  | 32336586 | G | 0.47 | 0.42 | A | 1.23 | 1.12 | 1.34 | 1.31E-05 | 1.69E-05 |
| 6 | rs3129939  | 32336766 | G | 0.17 | 0.16 | A | 1.10 | 0.97 | 1.25 | 1.46E-01 | 1.28E-01 |
| 6 | rs3129941  | 32337686 | A | 0.20 | 0.24 | G | 0.81 | 0.72 | 0.90 | 1.59E-04 | 2.91E-04 |
| 6 | rs3129943  | 32338695 | G | 0.23 | 0.23 | A | 0.98 | 0.88 | 1.10 | 7.32E-01 | 7.31E-01 |
| 6 | rs2050190  | 32339076 | C | 0.31 | 0.31 | T | 0.99 | 0.89 | 1.09 | 8.00E-01 | 8.46E-01 |
| 6 | rs2050189  | 32339647 | G | 0.21 | 0.22 | A | 0.94 | 0.84 | 1.05 | 2.95E-01 | 3.13E-01 |
| 6 | rs9391858  | 32341398 | G | 0.11 | 0.15 | A | 0.75 | 0.66 | 0.87 | 5.91E-05 | 3.27E-05 |
| 6 | rs7758128  | 32345283 | A | 0.06 | 0.03 | C | 2.48 | 1.97 | 3.12 | 1.60E-15 | 8.54E-16 |
| 6 | rs2894252  | 32345443 | A | 0.37 | 0.30 | G | 1.38 | 1.25 | 1.52 | 9.49E-11 | 5.42E-11 |
| 6 | rs2894253  | 32345540 | G | 0.08 | 0.11 | T | 0.70 | 0.60 | 0.83 | 2.06E-05 | 9.60E-06 |
| 6 | rs2395153  | 32345595 | G | 0.44 | 0.40 | C | 1.19 | 1.08 | 1.31 | 3.10E-04 | 3.33E-04 |
| 6 | rs2894254  | 32345689 | G | 0.07 | 0.09 | T | 0.72 | 0.60 | 0.85 | 1.37E-04 | 1.70E-04 |
| 6 | rs9405094  | 32346408 | A | 0.37 | 0.29 | T | 1.38 | 1.25 | 1.53 | 7.92E-11 | 4.33E-11 |
| 6 | rs2395157  | 32348145 | G | 0.36 | 0.29 | A | 1.37 | 1.24 | 1.51 | 5.06E-10 | 2.72E-10 |
| 6 | rs9268454  | 32349711 | G | 0.37 | 0.29 | A | 1.39 | 1.26 | 1.53 | 5.66E-11 | 3.21E-11 |
| 6 | rs9268456  | 32349946 | A | 0.37 | 0.30 | C | 1.38 | 1.25 | 1.53 | 7.90E-11 | 4.43E-11 |
| 6 | rs28732201 | 32350454 | A | 0.04 | 0.03 | G | 1.07 | 0.83 | 1.37 | 6.16E-01 | 6.47E-01 |
| 6 | rs9268460  | 32351283 | C | 0.51 | 0.44 | T | 1.38 | 1.26 | 1.52 | 1.38E-11 | 1.48E-11 |
| 6 | rs9268461  | 32351901 | A | 0.37 | 0.30 | C | 1.38 | 1.25 | 1.53 | 8.22E-11 | 4.61E-11 |

|   |            |          |   |      |      |   |      |      |      |          |          |
|---|------------|----------|---|------|------|---|------|------|------|----------|----------|
| 6 | rs4424066  | 32354428 | G | 0.51 | 0.44 | A | 1.38 | 1.26 | 1.52 | 1.57E-11 | 1.67E-11 |
| 6 | rs9268472  | 32355605 | A | 0.51 | 0.44 | G | 1.38 | 1.26 | 1.52 | 1.64E-11 | 1.81E-11 |
| 6 | rs17423649 | 32357133 | T | 0.14 | 0.14 | C | 1.05 | 0.92 | 1.20 | 4.59E-01 | 5.15E-01 |
| 6 | rs17202259 | 32357489 | G | 0.14 | 0.13 | T | 1.05 | 0.92 | 1.20 | 4.77E-01 | 5.31E-01 |
| 6 | rs12529049 | 32357715 | T | 0.14 | 0.14 | C | 1.05 | 0.92 | 1.20 | 4.63E-01 | 5.19E-01 |
| 6 | rs3117099  | 32358270 | T | 0.19 | 0.21 | C | 0.87 | 0.78 | 0.98 | 2.08E-02 | 2.04E-02 |
| 6 | rs3117098  | 32358513 | C | 0.24 | 0.30 | T | 0.73 | 0.66 | 0.81 | 5.24E-09 | 5.59E-09 |
| 6 | rs16870123 | 32359460 | A | 0.14 | 0.14 | G | 1.05 | 0.92 | 1.20 | 4.54E-01 | 5.10E-01 |
| 6 | rs3817973  | 32361111 | A | 0.51 | 0.44 | G | 1.38 | 1.26 | 1.52 | 1.55E-11 | 1.61E-11 |
| 6 | rs12661254 | 32362173 | G | 0.02 | 0.02 | A | 1.26 | 0.90 | 1.76 | 1.77E-01 | 1.78E-01 |
| 6 | rs1980493  | 32363215 | G | 0.13 | 0.15 | A | 0.90 | 0.79 | 1.03 | 1.42E-01 | 1.52E-01 |
| 6 | rs2076530  | 32363816 | G | 0.52 | 0.44 | A | 1.40 | 1.28 | 1.54 | 1.94E-12 | 2.42E-12 |
| 6 | rs28366191 | 32364190 | G | 0.07 | 0.07 | A | 1.02 | 0.86 | 1.22 | 7.99E-01 | 7.66E-01 |
| 6 | rs3129955  | 32365840 | T | 0.24 | 0.30 | C | 0.73 | 0.66 | 0.81 | 6.08E-09 | 6.59E-09 |
| 6 | rs4248166  | 32366421 | C | 0.17 | 0.16 | T | 1.01 | 0.89 | 1.15 | 8.56E-01 | 9.29E-01 |
| 6 | rs3117116  | 32367017 | C | 0.10 | 0.14 | T | 0.67 | 0.58 | 0.78 | 5.36E-08 | 7.89E-08 |
| 6 | rs2294884  | 32367259 | C | 0.17 | 0.17 | A | 0.98 | 0.87 | 1.11 | 8.09E-01 | 7.48E-01 |
| 6 | rs3817963  | 32368087 | G | 0.37 | 0.30 | A | 1.38 | 1.25 | 1.52 | 7.12E-11 | 4.97E-11 |
| 6 | rs3763305  | 32369488 | A | 0.06 | 0.06 | G | 1.06 | 0.87 | 1.30 | 5.35E-01 | 4.97E-01 |
| 6 | rs2076524  | 32370684 | C | 0.37 | 0.29 | T | 1.39 | 1.26 | 1.53 | 6.52E-11 | 3.66E-11 |
| 6 | rs28362680 | 32370816 | T | 0.11 | 0.08 | C | 1.44 | 1.24 | 1.69 | 3.23E-06 | 3.08E-06 |
| 6 | rs2076522  | 32371179 | G | 0.37 | 0.30 | C | 1.38 | 1.25 | 1.53 | 8.09E-11 | 4.57E-11 |
| 6 | rs3793127  | 32371915 | T | 0.29 | 0.22 | C | 1.43 | 1.29 | 1.59 | 1.08E-11 | 7.68E-12 |
| 6 | rs28362683 | 32372963 | T | 0.10 | 0.07 | C | 1.46 | 1.25 | 1.72 | 2.78E-06 | 2.00E-06 |
| 6 | rs10947262 | 32373312 | T | 0.11 | 0.08 | C | 1.45 | 1.24 | 1.70 | 2.17E-06 | 2.04E-06 |
| 6 | rs3806156  | 32373698 | T | 0.48 | 0.37 | G | 1.53 | 1.39 | 1.68 | 7.74E-19 | 3.60E-19 |
| 6 | rs9268491  | 32374131 | G | 0.37 | 0.29 | C | 1.39 | 1.26 | 1.53 | 5.64E-11 | 3.16E-11 |
| 6 | rs3763309  | 32375973 | A | 0.29 | 0.22 | C | 1.43 | 1.29 | 1.59 | 1.08E-11 | 7.68E-12 |
| 6 | rs3763312  | 32376348 | A | 0.29 | 0.22 | G | 1.44 | 1.29 | 1.59 | 9.43E-12 | 6.71E-12 |
| 6 | rs3763313  | 32376471 | C | 0.15 | 0.19 | A | 0.74 | 0.65 | 0.83 | 1.32E-06 | 6.19E-07 |
| 6 | rs5007265  | 32378866 | T | 0.44 | 0.47 | G | 0.87 | 0.79 | 0.95 | 2.74E-03 | 3.43E-03 |
| 6 | rs3129962  | 32379383 | A | 0.07 | 0.09 | G | 0.67 | 0.57 | 0.80 | 1.01E-05 | 1.39E-05 |
| 6 | rs17208888 | 32379506 | A | 0.09 | 0.10 | G | 0.86 | 0.73 | 1.01 | 6.08E-02 | 4.90E-02 |
| 6 | rs9405098  | 32379736 | A | 0.02 | 0.02 | G | 1.06 | 0.76 | 1.49 | 7.19E-01 | 7.70E-01 |



|   |            |          |   |      |      |   |      |      |      |          |          |
|---|------------|----------|---|------|------|---|------|------|------|----------|----------|
| 6 | rs3129963  | 32380208 | G | 0.20 | 0.17 | A | 1.19 | 1.06 | 1.34 | 3.84E-03 | 2.96E-03 |
| 6 | rs6932542  | 32380262 | A | 0.44 | 0.47 | G | 0.87 | 0.79 | 0.95 | 2.78E-03 | 3.47E-03 |
| 6 | rs9268528  | 32383108 | G | 0.43 | 0.38 | A | 1.21 | 1.10 | 1.33 | 4.54E-05 | 5.54E-05 |
| 6 | rs9268530  | 32383223 | C | 0.19 | 0.16 | T | 1.19 | 1.06 | 1.35 | 4.41E-03 | 3.63E-03 |
| 6 | rs2227138  | 32384500 | A | 0.12 | 0.14 | G | 0.86 | 0.75 | 0.99 | 3.64E-02 | 3.84E-02 |
| 6 | rs9268542  | 32384721 | G | 0.43 | 0.39 | A | 1.21 | 1.10 | 1.32 | 5.39E-05 | 6.75E-05 |
| 6 | rs2187820  | 32385873 | A | 0.19 | 0.16 | G | 1.19 | 1.06 | 1.34 | 4.62E-03 | 3.83E-03 |
| 6 | rs2395162  | 32387780 | T | 0.19 | 0.16 | G | 1.19 | 1.06 | 1.35 | 4.51E-03 | 3.73E-03 |
| 6 | rs2395163  | 32387809 | C | 0.29 | 0.22 | T | 1.44 | 1.29 | 1.59 | 9.91E-12 | 9.57E-12 |
| 6 | rs3135366  | 32388709 | G | 0.19 | 0.16 | A | 1.19 | 1.06 | 1.35 | 4.51E-03 | 3.73E-03 |
| 6 | rs3135363  | 32389648 | C | 0.28 | 0.28 | T | 1.00 | 0.90 | 1.11 | 9.95E-01 | 9.84E-01 |
| 6 | rs34330585 | 32390703 | C | 0.08 | 0.11 | G | 0.69 | 0.59 | 0.81 | 7.61E-06 | 3.62E-06 |
| 6 | rs3135353  | 32392877 | A | 0.12 | 0.14 | G | 0.88 | 0.76 | 1.01 | 6.24E-02 | 6.80E-02 |
| 6 | rs3135350  | 32392981 | G | 0.09 | 0.14 | A | 0.66 | 0.57 | 0.76 | 2.08E-08 | 4.21E-08 |
| 6 | rs3129971  | 32393235 | G | 0.09 | 0.14 | C | 0.66 | 0.57 | 0.76 | 1.42E-08 | 2.85E-08 |
| 6 | rs3135344  | 32395036 | G | 0.22 | 0.30 | A | 0.69 | 0.62 | 0.77 | 2.97E-12 | 2.32E-12 |
| 6 | rs3129843  | 32395726 | G | 0.07 | 0.09 | A | 0.71 | 0.60 | 0.85 | 1.30E-04 | 1.55E-04 |
| 6 | rs3135342  | 32396615 | A | 0.28 | 0.28 | C | 1.00 | 0.90 | 1.11 | 9.83E-01 | 9.69E-01 |
| 6 | rs9268585  | 32397403 | G | 0.44 | 0.38 | T | 1.23 | 1.12 | 1.35 | 1.15E-05 | 1.14E-05 |
| 6 | rs9268589  | 32398202 | A | 0.44 | 0.39 | G | 1.21 | 1.11 | 1.33 | 3.69E-05 | 3.60E-05 |
| 6 | rs4988821  | 32399022 | G | 0.28 | 0.28 | A | 1.01 | 0.91 | 1.11 | 9.30E-01 | 9.77E-01 |
| 6 | rs16870148 | 32399636 | A | 0.01 | 0.01 | G | 1.42 | 0.92 | 2.16 | 1.08E-01 | 9.63E-02 |
| 6 | rs9501626  | 32400344 | A | 0.11 | 0.12 | C | 0.92 | 0.79 | 1.06 | 2.40E-01 | 2.58E-01 |
| 6 | rs3129860  | 32401079 | A | 0.10 | 0.14 | G | 0.67 | 0.58 | 0.78 | 5.47E-08 | 8.26E-08 |
| 6 | rs3135338  | 32401217 | G | 0.29 | 0.34 | A | 0.80 | 0.73 | 0.89 | 1.37E-05 | 1.83E-05 |
| 6 | rs7356880  | 32401327 | T | 0.05 | 0.05 | C | 1.03 | 0.84 | 1.28 | 7.71E-01 | 7.68E-01 |
| 6 | rs2027856  | 32402705 | T | 0.11 | 0.12 | C | 0.91 | 0.79 | 1.06 | 2.22E-01 | 2.40E-01 |
| 6 | rs9268615  | 32402889 | A | 0.44 | 0.39 | G | 1.21 | 1.10 | 1.32 | 6.15E-05 | 6.10E-05 |
| 6 | rs2395173  | 32404859 | A | 0.29 | 0.34 | G | 0.80 | 0.73 | 0.89 | 1.19E-05 | 1.63E-05 |
| 6 | rs2395174  | 32404878 | G | 0.28 | 0.28 | T | 1.00 | 0.90 | 1.11 | 9.61E-01 | 1.00E+00 |
| 6 | rs2395175  | 32405026 | A | 0.23 | 0.17 | G | 1.46 | 1.30 | 1.63 | 1.07E-10 | 3.04E-11 |
| 6 | rs3129871  | 32406342 | A | 0.35 | 0.36 | C | 0.97 | 0.88 | 1.07 | 5.34E-01 | 5.96E-01 |
| 6 | rs9268644  | 32408044 | A | 0.37 | 0.42 | C | 0.84 | 0.76 | 0.92 | 1.48E-04 | 1.61E-04 |
| 6 | rs3135393  | 32408842 | C | 0.20 | 0.17 | T | 1.24 | 1.10 | 1.39 | 4.14E-04 | 3.45E-04 |

|   |            |          |   |      |      |   |      |      |      |          |          |
|---|------------|----------|---|------|------|---|------|------|------|----------|----------|
| 6 | rs3129882  | 32409530 | G | 0.36 | 0.42 | A | 0.77 | 0.70 | 0.84 | 3.60E-08 | 3.43E-08 |
| 6 | rs9268658  | 32410716 | A | 0.52 | 0.47 | G | 1.22 | 1.12 | 1.34 | 1.44E-05 | 1.21E-05 |
| 6 | rs2239804  | 32411523 | G | 0.52 | 0.47 | A | 1.22 | 1.12 | 1.34 | 1.42E-05 | 1.18E-05 |
| 6 | rs11544315 | 32411573 | A | 0.04 | 0.04 | G | 1.01 | 0.79 | 1.29 | 9.53E-01 | 9.61E-01 |
| 6 | rs7192     | 32411646 | T | 0.37 | 0.39 | G | 0.93 | 0.85 | 1.02 | 1.29E-01 | 1.52E-01 |
| 6 | rs2239803  | 32411833 | A | 0.53 | 0.48 | G | 1.21 | 1.11 | 1.33 | 3.93E-05 | 3.31E-05 |
| 6 | rs4935356  | 32412388 | C | 0.52 | 0.47 | A | 1.22 | 1.11 | 1.34 | 1.78E-05 | 1.44E-05 |
| 6 | rs2395182  | 32413317 | G | 0.17 | 0.22 | T | 0.75 | 0.67 | 0.84 | 1.10E-06 | 1.42E-06 |
| 6 | rs3129890  | 32414273 | C | 0.27 | 0.25 | T | 1.15 | 1.04 | 1.28 | 8.52E-03 | 7.51E-03 |
| 6 | rs6937545  | 32418031 | A | 0.31 | 0.33 | C | 0.95 | 0.86 | 1.05 | 3.32E-01 | 4.25E-01 |
| 6 | rs28895095 | 32418848 | A | 0.11 | 0.14 | G | 0.75 | 0.65 | 0.86 | 3.64E-05 | 1.94E-05 |
| 6 | rs28895103 | 32419464 | A | 0.11 | 0.14 | G | 0.77 | 0.66 | 0.88 | 2.34E-04 | 1.37E-04 |
| 6 | rs7754768  | 32420179 | C | 0.39 | 0.40 | T | 0.95 | 0.86 | 1.04 | 2.75E-01 | 3.29E-01 |
| 6 | rs28895187 | 32424380 | A | 0.11 | 0.14 | G | 0.74 | 0.65 | 0.86 | 3.20E-05 | 1.68E-05 |
| 6 | rs7763262  | 32424882 | T | 0.31 | 0.33 | C | 0.95 | 0.86 | 1.05 | 3.32E-01 | 4.25E-01 |
| 6 | rs13198610 | 32425672 | T | 0.11 | 0.14 | G | 0.74 | 0.64 | 0.85 | 2.78E-05 | 1.45E-05 |
| 6 | rs28732227 | 32427361 | T | 0.05 | 0.05 | C | 1.03 | 0.83 | 1.28 | 7.85E-01 | 7.88E-01 |
| 6 | rs9268832  | 32427789 | T | 0.37 | 0.39 | C | 0.93 | 0.85 | 1.02 | 1.34E-01 | 1.73E-01 |
| 6 | rs6903608  | 32428285 | C | 0.24 | 0.32 | T | 0.68 | 0.61 | 0.76 | 6.57E-13 | 9.41E-13 |
| 6 | rs9268880  | 32431358 | T | 0.24 | 0.32 | G | 0.68 | 0.61 | 0.76 | 5.86E-13 | 7.81E-13 |
| 6 | rs9268911  | 32432406 | G | 0.28 | 0.24 | A | 1.20 | 1.08 | 1.33 | 7.78E-04 | 8.05E-04 |
| 6 | rs2395185  | 32433167 | T | 0.42 | 0.33 | G | 1.42 | 1.29 | 1.56 | 2.93E-13 | 1.91E-13 |
| 6 | rs9268977  | 32434939 | C | 0.28 | 0.24 | T | 1.19 | 1.07 | 1.32 | 9.91E-04 | 1.02E-03 |
| 6 | rs9268980  | 32435123 | G | 0.28 | 0.24 | A | 1.20 | 1.08 | 1.33 | 8.69E-04 | 9.15E-04 |
| 6 | rs9405108  | 32438648 | T | 0.42 | 0.33 | C | 1.42 | 1.29 | 1.56 | 4.44E-13 | 2.86E-13 |
| 6 | rs2157338  | 32439323 | A | 0.28 | 0.24 | G | 1.19 | 1.07 | 1.32 | 9.91E-04 | 1.02E-03 |
| 6 | rs17209754 | 32442703 | A | 0.06 | 0.04 | G | 1.46 | 1.19 | 1.79 | 2.81E-04 | 2.17E-04 |
| 6 | rs7748472  | 32448763 | G | 0.06 | 0.04 | A | 1.55 | 1.26 | 1.92 | 4.39E-05 | 2.98E-05 |
| 6 | rs1964995  | 32449411 | G | 0.48 | 0.44 | A | 1.19 | 1.09 | 1.31 | 1.88E-04 | 2.24E-04 |
| 6 | rs2157337  | 32501144 | A | 0.39 | 0.38 | G | 1.03 | 0.94 | 1.13 | 5.02E-01 | 5.22E-01 |
| 6 | rs28772724 | 32509357 | T | 0.42 | 0.33 | G | 1.41 | 1.29 | 1.55 | 1.29E-13 | 8.80E-14 |
| 6 | rs34369284 | 32514144 | A | 0.39 | 0.38 | G | 1.03 | 0.94 | 1.13 | 5.73E-01 | 6.04E-01 |
| 6 | rs28530648 | 32527079 | C | 0.07 | 0.12 | A | 0.61 | 0.52 | 0.72 | 4.32E-09 | 1.74E-09 |
| 6 | rs28366298 | 32560859 | C | 0.41 | 0.32 | A | 1.46 | 1.32 | 1.60 | 7.74E-15 | 5.08E-15 |

|   |            |          |   |      |      |   |      |      |      |          |          |
|---|------------|----------|---|------|------|---|------|------|------|----------|----------|
| 6 | rs35265698 | 32561334 | G | 0.24 | 0.17 | C | 1.47 | 1.32 | 1.65 | 8.79E-12 | 7.77E-12 |
| 6 | rs11754183 | 32566156 | A | 0.03 | 0.03 | G | 0.90 | 0.70 | 1.15 | 3.94E-01 | 3.75E-01 |
| 6 | rs28605404 | 32569687 | G | 0.07 | 0.11 | A | 0.61 | 0.51 | 0.72 | 2.93E-09 | 1.20E-09 |
| 6 | rs477515   | 32569691 | T | 0.41 | 0.32 | C | 1.47 | 1.33 | 1.61 | 2.44E-15 | 1.60E-15 |
| 6 | rs2516049  | 32570400 | G | 0.41 | 0.32 | A | 1.47 | 1.33 | 1.61 | 2.43E-15 | 1.61E-15 |
| 6 | rs9270856  | 32570839 | A | 0.19 | 0.27 | G | 0.64 | 0.57 | 0.71 | 1.69E-15 | 1.74E-15 |
| 6 | rs2858870  | 32572251 | G | 0.16 | 0.14 | A | 1.19 | 1.04 | 1.35 | 8.76E-03 | 8.00E-03 |
| 6 | rs9270984  | 32573991 | T | 0.12 | 0.16 | G | 0.71 | 0.62 | 0.81 | 4.58E-07 | 7.97E-07 |
| 6 | rs9271100  | 32576478 | T | 0.19 | 0.27 | C | 0.64 | 0.57 | 0.71 | 1.14E-15 | 1.19E-15 |
| 6 | rs660895   | 32577380 | G | 0.26 | 0.21 | A | 1.32 | 1.19 | 1.47 | 2.59E-07 | 2.22E-07 |
| 6 | rs9271170  | 32577889 | T | 0.19 | 0.27 | C | 0.64 | 0.57 | 0.71 | 1.07E-15 | 1.08E-15 |
| 6 | rs532098   | 32578052 | C | 0.40 | 0.54 | T | 0.57 | 0.52 | 0.63 | 1.97E-31 | 1.23E-31 |
| 6 | rs35759989 | 32581096 | G | 0.06 | 0.04 | A | 1.46 | 1.19 | 1.79 | 2.90E-04 | 2.34E-04 |
| 6 | rs9271300  | 32581582 | C | 0.55 | 0.47 | G | 1.35 | 1.23 | 1.48 | 1.16E-10 | 5.03E-11 |
| 6 | rs642093   | 32582075 | A | 0.18 | 0.23 | G | 0.72 | 0.65 | 0.81 | 4.05E-08 | 2.87E-08 |
| 6 | rs13204672 | 32582796 | G | 0.17 | 0.15 | A | 1.19 | 1.05 | 1.35 | 6.03E-03 | 5.79E-03 |
| 6 | rs9271348  | 32583742 | G | 0.27 | 0.29 | A | 0.90 | 0.81 | 0.99 | 3.59E-02 | 4.49E-02 |
| 6 | rs9271366  | 32586854 | G | 0.10 | 0.14 | A | 0.66 | 0.57 | 0.76 | 1.06E-08 | 1.94E-08 |
| 6 | rs9271488  | 32589000 | T | 0.41 | 0.32 | G | 1.47 | 1.33 | 1.61 | 2.54E-15 | 1.54E-15 |
| 6 | rs17533090 | 32590722 | T | 0.11 | 0.16 | G | 0.68 | 0.60 | 0.79 | 7.79E-08 | 3.59E-08 |
| 6 | rs3129763  | 32590925 | A | 0.17 | 0.22 | G | 0.71 | 0.64 | 0.80 | 2.14E-08 | 1.36E-08 |
| 6 | rs35399661 | 32590990 | G | 0.11 | 0.16 | A | 0.69 | 0.60 | 0.79 | 1.01E-07 | 4.64E-08 |
| 6 | rs28421666 | 32592737 | G | 0.02 | 0.03 | A | 0.50 | 0.36 | 0.70 | 3.31E-05 | 3.46E-05 |
| 6 | rs34518860 | 32594103 | A | 0.17 | 0.11 | G | 1.72 | 1.51 | 1.96 | 4.40E-16 | 4.47E-16 |
| 6 | rs9272105  | 32599999 | G | 0.53 | 0.48 | A | 1.21 | 1.11 | 1.33 | 4.26E-05 | 2.07E-05 |
| 6 | rs9272143  | 32600803 | C | 0.45 | 0.49 | T | 0.88 | 0.80 | 0.96 | 6.09E-03 | 3.82E-03 |
| 6 | rs17211510 | 32602430 | A | 0.27 | 0.25 | C | 1.12 | 1.01 | 1.24 | 4.07E-02 | 5.04E-02 |
| 6 | rs3104369  | 32602482 | A | 0.25 | 0.26 | G | 0.95 | 0.85 | 1.05 | 2.88E-01 | 3.29E-01 |
| 6 | rs28383344 | 32605067 | G | 0.16 | 0.14 | C | 1.18 | 1.04 | 1.35 | 1.03E-02 | 9.57E-03 |
| 6 | rs2187668  | 32605884 | A | 0.08 | 0.11 | G | 0.68 | 0.58 | 0.80 | 2.43E-06 | 2.81E-06 |
| 6 | rs9273327  | 32623223 | C | 0.08 | 0.11 | A | 0.69 | 0.58 | 0.81 | 5.10E-06 | 5.45E-06 |
| 6 | rs9273349  | 32625869 | T | 0.39 | 0.41 | C | 0.93 | 0.84 | 1.01 | 9.37E-02 | 9.78E-02 |
| 6 | rs1063355  | 32627714 | A | 0.39 | 0.41 | C | 0.93 | 0.85 | 1.01 | 9.70E-02 | 1.01E-01 |
| 6 | rs9274407  | 32632832 | A | 0.11 | 0.17 | T | 0.61 | 0.53 | 0.70 | 2.03E-12 | 3.92E-12 |

|   |            |          |   |      |      |   |      |      |      |          |          |
|---|------------|----------|---|------|------|---|------|------|------|----------|----------|
| 6 | rs2647025  | 32635949 | T | 0.31 | 0.28 | C | 1.14 | 1.03 | 1.26 | 1.01E-02 | 1.06E-02 |
| 6 | rs9274689  | 32636930 | T | 0.46 | 0.52 | C | 0.82 | 0.75 | 0.89 | 1.10E-05 | 1.39E-05 |
| 6 | rs17212090 | 32650809 | T | 0.29 | 0.26 | C | 1.17 | 1.05 | 1.29 | 3.21E-03 | 2.92E-03 |
| 6 | rs9275141  | 32651117 | T | 0.44 | 0.50 | G | 0.80 | 0.73 | 0.88 | 1.40E-06 | 1.67E-06 |
| 6 | rs2856695  | 32651894 | T | 0.44 | 0.50 | C | 0.80 | 0.73 | 0.88 | 1.45E-06 | 1.70E-06 |
| 6 | rs7755224  | 32652317 | G | 0.07 | 0.11 | A | 0.62 | 0.52 | 0.73 | 8.18E-09 | 3.19E-09 |
| 6 | rs17212420 | 32652400 | T | 0.29 | 0.26 | C | 1.17 | 1.06 | 1.30 | 2.33E-03 | 2.15E-03 |
| 6 | rs2856692  | 32653385 | C | 0.27 | 0.24 | A | 1.15 | 1.03 | 1.27 | 9.73E-03 | 1.17E-02 |
| 6 | rs9275184  | 32654714 | C | 0.13 | 0.11 | T | 1.17 | 1.02 | 1.35 | 2.77E-02 | 3.19E-02 |
| 6 | rs2856683  | 32655218 | C | 0.27 | 0.24 | A | 1.14 | 1.02 | 1.27 | 1.68E-02 | 2.03E-02 |
| 6 | rs4538747  | 32657334 | A | 0.29 | 0.26 | T | 1.18 | 1.06 | 1.30 | 2.10E-03 | 1.89E-03 |
| 6 | rs7774434  | 32657578 | C | 0.37 | 0.38 | T | 0.94 | 0.86 | 1.04 | 2.19E-01 | 1.65E-01 |
| 6 | rs7775228  | 32658079 | C | 0.14 | 0.14 | T | 1.07 | 0.94 | 1.22 | 3.29E-01 | 3.49E-01 |
| 6 | rs9275219  | 32659077 | T | 0.21 | 0.25 | C | 0.81 | 0.73 | 0.91 | 2.34E-04 | 1.36E-04 |
| 6 | rs9275224  | 32659878 | A | 0.50 | 0.49 | G | 1.02 | 0.93 | 1.11 | 7.17E-01 | 6.31E-01 |
| 6 | rs5000634  | 32663564 | C | 0.43 | 0.39 | T | 1.15 | 1.05 | 1.26 | 2.65E-03 | 3.07E-03 |
| 6 | rs6457617  | 32663851 | C | 0.50 | 0.49 | T | 1.03 | 0.94 | 1.12 | 5.85E-01 | 5.05E-01 |
| 6 | rs2647012  | 32664458 | A | 0.37 | 0.38 | G | 0.94 | 0.85 | 1.03 | 1.64E-01 | 2.08E-01 |
| 6 | rs9357152  | 32664960 | G | 0.28 | 0.25 | A | 1.16 | 1.05 | 1.29 | 4.11E-03 | 3.96E-03 |
| 6 | rs10484561 | 32665420 | G | 0.07 | 0.11 | T | 0.62 | 0.52 | 0.73 | 8.20E-09 | 3.62E-09 |
| 6 | rs9275312  | 32665728 | G | 0.15 | 0.14 | A | 1.06 | 0.93 | 1.20 | 4.14E-01 | 4.38E-01 |
| 6 | rs1794282  | 32666526 | A | 0.07 | 0.09 | G | 0.71 | 0.60 | 0.85 | 1.29E-04 | 1.51E-04 |
| 6 | rs2856725  | 32666738 | G | 0.37 | 0.38 | A | 0.93 | 0.85 | 1.03 | 1.54E-01 | 1.97E-01 |
| 6 | rs35998847 | 32666997 | A | 0.07 | 0.11 | G | 0.61 | 0.52 | 0.73 | 6.85E-09 | 2.93E-09 |
| 6 | rs2858312  | 32667230 | G | 0.38 | 0.32 | C | 1.27 | 1.15 | 1.39 | 1.36E-06 | 1.28E-06 |
| 6 | rs9275371  | 32668296 | C | 0.22 | 0.26 | T | 0.83 | 0.74 | 0.92 | 7.34E-04 | 4.38E-04 |
| 6 | rs9275374  | 32668526 | T | 0.22 | 0.26 | C | 0.83 | 0.75 | 0.93 | 8.05E-04 | 4.82E-04 |
| 6 | rs9275388  | 32669084 | C | 0.22 | 0.26 | T | 0.83 | 0.75 | 0.93 | 9.15E-04 | 5.36E-04 |
| 6 | rs9275390  | 32669156 | C | 0.22 | 0.26 | T | 0.84 | 0.75 | 0.93 | 1.22E-03 | 7.35E-04 |
| 6 | rs11752643 | 32669373 | T | 0.04 | 0.03 | C | 1.28 | 1.01 | 1.63 | 4.29E-02 | 3.72E-02 |
| 6 | rs9275393  | 32669439 | A | 0.22 | 0.26 | G | 0.83 | 0.74 | 0.92 | 7.27E-04 | 4.34E-04 |
| 6 | rs2647050  | 32669767 | C | 0.42 | 0.36 | T | 1.26 | 1.14 | 1.38 | 1.68E-06 | 1.54E-06 |
| 6 | rs9275406  | 32669955 | T | 0.22 | 0.26 | G | 0.83 | 0.75 | 0.93 | 9.23E-04 | 5.61E-04 |
| 6 | rs2858308  | 32670000 | A | 0.13 | 0.11 | C | 1.27 | 1.10 | 1.46 | 8.89E-04 | 9.04E-04 |

|   |            |          |   |      |      |   |      |      |      |          |          |
|---|------------|----------|---|------|------|---|------|------|------|----------|----------|
| 6 | rs9275407  | 32670037 | T | 0.22 | 0.26 | G | 0.83 | 0.75 | 0.93 | 7.78E-04 | 4.64E-04 |
| 6 | rs9275418  | 32670244 | G | 0.22 | 0.26 | A | 0.83 | 0.75 | 0.93 | 7.78E-04 | 4.64E-04 |
| 6 | rs2856718  | 32670255 | A | 0.42 | 0.36 | G | 1.26 | 1.14 | 1.38 | 1.65E-06 | 1.49E-06 |
| 6 | rs2856717  | 32670308 | T | 0.36 | 0.38 | C | 0.92 | 0.83 | 1.01 | 6.92E-02 | 9.07E-02 |
| 6 | rs2858305  | 32670464 | C | 0.36 | 0.38 | A | 0.92 | 0.84 | 1.01 | 8.04E-02 | 1.03E-01 |
| 6 | rs35120848 | 32670495 | T | 0.09 | 0.14 | C | 0.59 | 0.50 | 0.68 | 3.92E-12 | 1.34E-12 |
| 6 | rs9275424  | 32670576 | G | 0.22 | 0.26 | A | 0.84 | 0.75 | 0.94 | 1.58E-03 | 9.76E-04 |
| 6 | rs9275425  | 32670874 | A | 0.22 | 0.26 | C | 0.83 | 0.75 | 0.93 | 8.63E-04 | 5.27E-04 |
| 6 | rs9275427  | 32670915 | T | 0.22 | 0.26 | C | 0.83 | 0.75 | 0.93 | 7.78E-04 | 4.64E-04 |
| 6 | rs2856705  | 32670956 | A | 0.13 | 0.11 | G | 1.27 | 1.10 | 1.46 | 8.70E-04 | 8.90E-04 |
| 6 | rs9275428  | 32670978 | G | 0.22 | 0.26 | A | 0.83 | 0.75 | 0.93 | 8.06E-04 | 4.78E-04 |
| 6 | rs13192471 | 32671103 | C | 0.09 | 0.14 | T | 0.59 | 0.50 | 0.68 | 3.45E-12 | 1.20E-12 |
| 6 | rs9275439  | 32671521 | C | 0.22 | 0.26 | T | 0.83 | 0.75 | 0.93 | 1.02E-03 | 6.25E-04 |
| 6 | rs9275495  | 32673574 | T | 0.13 | 0.11 | A | 1.19 | 1.03 | 1.36 | 1.64E-02 | 1.85E-02 |
| 6 | rs1794265  | 32674737 | C | 0.03 | 0.02 | G | 1.01 | 0.75 | 1.35 | 9.61E-01 | 9.74E-01 |
| 6 | rs28371293 | 32677099 | A | 0.42 | 0.36 | T | 1.26 | 1.15 | 1.38 | 1.47E-06 | 1.35E-06 |
| 6 | rs16898264 | 32677152 | A | 0.42 | 0.36 | G | 1.26 | 1.15 | 1.39 | 1.20E-06 | 1.15E-06 |
| 6 | rs9275563  | 32677912 | T | 0.54 | 0.47 | C | 1.32 | 1.21 | 1.45 | 1.54E-09 | 2.02E-09 |
| 6 | rs9275572  | 32678999 | A | 0.38 | 0.41 | G | 0.87 | 0.80 | 0.96 | 4.76E-03 | 6.70E-03 |
| 6 | rs3129727  | 32679690 | T | 0.03 | 0.03 | C | 1.00 | 0.75 | 1.34 | 9.86E-01 | 9.92E-01 |
| 6 | rs9275582  | 32680070 | T | 0.20 | 0.22 | C | 0.88 | 0.79 | 0.98 | 2.46E-02 | 1.67E-02 |
| 6 | rs7765379  | 32680928 | G | 0.14 | 0.11 | T | 1.35 | 1.18 | 1.55 | 1.49E-05 | 1.31E-05 |
| 6 | rs7745656  | 32680970 | T | 0.29 | 0.28 | G | 1.05 | 0.95 | 1.16 | 3.56E-01 | 3.81E-01 |
| 6 | rs2858332  | 32681161 | C | 0.51 | 0.49 | A | 1.05 | 0.96 | 1.15 | 3.24E-01 | 2.56E-01 |
| 6 | rs2858331  | 32681277 | C | 0.36 | 0.39 | T | 0.88 | 0.80 | 0.96 | 5.61E-03 | 3.48E-03 |
| 6 | rs9275595  | 32681355 | C | 0.20 | 0.22 | T | 0.87 | 0.78 | 0.98 | 1.97E-02 | 1.33E-02 |
| 6 | rs7454108  | 32681483 | C | 0.13 | 0.11 | T | 1.19 | 1.03 | 1.37 | 1.62E-02 | 1.82E-02 |
| 6 | rs9275596  | 32681631 | C | 0.34 | 0.36 | T | 0.91 | 0.83 | 1.01 | 6.59E-02 | 8.79E-02 |
| 6 | rs3957148  | 32682137 | G | 0.13 | 0.11 | A | 1.21 | 1.05 | 1.39 | 8.63E-03 | 1.05E-02 |
| 6 | rs3104404  | 32682174 | A | 0.17 | 0.19 | C | 0.90 | 0.80 | 1.01 | 7.39E-02 | 5.75E-02 |
| 6 | rs2894381  | 32682228 | A | 0.29 | 0.26 | G | 1.16 | 1.04 | 1.28 | 5.28E-03 | 5.15E-03 |
| 6 | rs3104405  | 32682308 | C | 0.24 | 0.33 | A | 0.68 | 0.61 | 0.75 | 5.50E-14 | 5.33E-14 |
| 6 | rs3873444  | 32682724 | A | 0.14 | 0.10 | G | 1.42 | 1.24 | 1.63 | 6.95E-07 | 8.36E-07 |
| 6 | rs9275602  | 32682812 | A | 0.16 | 0.15 | C | 1.07 | 0.95 | 1.22 | 2.70E-01 | 2.36E-01 |

|   |            |          |   |      |      |   |      |      |      |          |          |
|---|------------|----------|---|------|------|---|------|------|------|----------|----------|
| 6 | rs3892710  | 32682862 | T | 0.22 | 0.18 | C | 1.32 | 1.17 | 1.47 | 2.03E-06 | 3.95E-06 |
| 6 | rs3997854  | 32682915 | G | 0.15 | 0.12 | T | 1.21 | 1.06 | 1.38 | 5.70E-03 | 6.95E-03 |
| 6 | rs9275615  | 32684272 | A | 0.14 | 0.12 | T | 1.25 | 1.10 | 1.43 | 1.02E-03 | 1.11E-03 |
| 6 | rs3916765  | 32685550 | A | 0.14 | 0.12 | G | 1.20 | 1.04 | 1.37 | 1.09E-02 | 1.13E-02 |
| 6 | rs3104398  | 32685685 | A | 0.11 | 0.11 | G | 1.02 | 0.88 | 1.18 | 7.93E-01 | 7.85E-01 |
| 6 | rs12177980 | 32686084 | A | 0.42 | 0.41 | G | 1.07 | 0.98 | 1.18 | 1.34E-01 | 1.42E-01 |
| 6 | rs9275659  | 32686103 | A | 0.21 | 0.20 | C | 1.05 | 0.93 | 1.18 | 4.24E-01 | 3.94E-01 |
| 6 | rs9275686  | 32687570 | A | 0.21 | 0.20 | G | 1.05 | 0.93 | 1.18 | 4.15E-01 | 3.84E-01 |
| 6 | rs9275698  | 32687973 | G | 0.34 | 0.35 | A | 0.99 | 0.90 | 1.10 | 9.08E-01 | 9.16E-01 |
| 6 | rs9461799  | 32689529 | C | 0.42 | 0.41 | T | 1.07 | 0.98 | 1.18 | 1.45E-01 | 1.52E-01 |
| 6 | rs9275793  | 32690027 | G | 0.23 | 0.25 | A | 0.92 | 0.82 | 1.02 | 1.21E-01 | 1.26E-01 |
| 6 | rs9275915  | 32692493 | G | 0.23 | 0.25 | C | 0.92 | 0.82 | 1.02 | 1.14E-01 | 1.18E-01 |
| 6 | rs28772340 | 32692953 | C | 0.43 | 0.41 | T | 1.07 | 0.98 | 1.18 | 1.39E-01 | 1.49E-01 |
| 6 | rs9276017  | 32695022 | T | 0.23 | 0.25 | C | 0.92 | 0.82 | 1.02 | 1.16E-01 | 1.22E-01 |
| 6 | rs9276157  | 32698369 | T | 0.23 | 0.25 | C | 0.92 | 0.83 | 1.03 | 1.34E-01 | 1.39E-01 |
| 6 | rs9276162  | 32698457 | G | 0.23 | 0.25 | A | 0.92 | 0.82 | 1.02 | 1.23E-01 | 1.28E-01 |
| 6 | rs2859078  | 32702449 | C | 0.21 | 0.20 | T | 1.05 | 0.94 | 1.18 | 3.72E-01 | 3.55E-01 |
| 6 | rs9276291  | 32702813 | T | 0.23 | 0.24 | C | 0.93 | 0.84 | 1.04 | 2.03E-01 | 2.09E-01 |
| 6 | rs7762228  | 32704266 | G | 0.02 | 0.01 | A | 1.51 | 1.06 | 2.17 | 2.33E-02 | 2.44E-02 |
| 6 | rs9276310  | 32704523 | A | 0.14 | 0.14 | G | 0.94 | 0.82 | 1.07 | 3.46E-01 | 3.34E-01 |
| 6 | rs13214069 | 32705248 | C | 0.42 | 0.41 | T | 1.06 | 0.97 | 1.17 | 1.98E-01 | 2.10E-01 |
| 6 | rs13199787 | 32705276 | T | 0.43 | 0.41 | C | 1.07 | 0.97 | 1.17 | 1.76E-01 | 1.90E-01 |
| 6 | rs7773694  | 32706334 | A | 0.23 | 0.24 | G | 0.94 | 0.84 | 1.05 | 2.43E-01 | 2.58E-01 |
| 6 | rs7755596  | 32706478 | C | 0.23 | 0.24 | T | 0.92 | 0.82 | 1.03 | 1.33E-01 | 1.43E-01 |
| 6 | rs9276370  | 32707295 | G | 0.44 | 0.45 | T | 0.97 | 0.88 | 1.06 | 5.00E-01 | 5.39E-01 |
| 6 | rs9276399  | 32708890 | G | 0.13 | 0.14 | A | 0.90 | 0.78 | 1.03 | 1.22E-01 | 1.21E-01 |
| 6 | rs4394270  | 32709964 | C | 0.33 | 0.34 | T | 0.96 | 0.87 | 1.06 | 4.47E-01 | 4.49E-01 |
| 6 | rs17500468 | 32711178 | G | 0.12 | 0.13 | A | 0.92 | 0.80 | 1.06 | 2.56E-01 | 2.04E-01 |
| 6 | rs17500510 | 32712818 | A | 0.13 | 0.10 | G | 1.40 | 1.21 | 1.61 | 3.49E-06 | 4.23E-06 |
| 6 | rs2239800  | 32713267 | C | 0.09 | 0.08 | T | 1.07 | 0.91 | 1.25 | 4.40E-01 | 4.61E-01 |
| 6 | rs9276435  | 32713867 | T | 0.18 | 0.17 | C | 1.05 | 0.93 | 1.19 | 4.50E-01 | 4.33E-01 |
| 6 | rs2071800  | 32714143 | T | 0.11 | 0.07 | C | 1.54 | 1.31 | 1.80 | 1.41E-07 | 1.31E-07 |
| 6 | rs4415152  | 32717024 | C | 0.07 | 0.07 | T | 0.93 | 0.77 | 1.11 | 4.01E-01 | 4.05E-01 |
| 6 | rs9276472  | 32717224 | G | 0.07 | 0.07 | A | 0.92 | 0.77 | 1.10 | 3.58E-01 | 3.67E-01 |

|   |            |          |   |      |      |   |      |      |      |          |          |
|---|------------|----------|---|------|------|---|------|------|------|----------|----------|
| 6 | rs9276487  | 32718594 | A | 0.07 | 0.07 | T | 0.92 | 0.77 | 1.10 | 3.53E-01 | 3.62E-01 |
| 6 | rs5016066  | 32718818 | C | 0.50 | 0.50 | A | 1.02 | 0.93 | 1.12 | 6.50E-01 | 6.61E-01 |
| 6 | rs9276502  | 32719666 | C | 0.07 | 0.07 | A | 0.92 | 0.77 | 1.11 | 3.90E-01 | 3.99E-01 |
| 6 | rs9276516  | 32720302 | C | 0.07 | 0.07 | T | 0.92 | 0.77 | 1.10 | 3.74E-01 | 3.86E-01 |
| 6 | rs10807113 | 32722186 | A | 0.50 | 0.49 | C | 1.01 | 0.92 | 1.11 | 8.08E-01 | 8.37E-01 |
| 6 | rs7756516  | 32723917 | T | 0.50 | 0.49 | C | 1.01 | 0.92 | 1.11 | 7.83E-01 | 8.10E-01 |
| 6 | rs7774954  | 32724189 | A | 0.07 | 0.07 | C | 0.91 | 0.76 | 1.09 | 3.12E-01 | 3.23E-01 |
| 6 | rs2301271  | 32725193 | T | 0.43 | 0.43 | C | 1.01 | 0.92 | 1.11 | 8.31E-01 | 7.95E-01 |
| 6 | rs1023449  | 32727905 | T | 0.43 | 0.43 | G | 1.01 | 0.92 | 1.11 | 8.22E-01 | 8.03E-01 |
| 6 | rs2051549  | 32730086 | C | 0.43 | 0.43 | T | 1.01 | 0.92 | 1.11 | 8.15E-01 | 7.88E-01 |
| 6 | rs2071550  | 32730940 | T | 0.30 | 0.31 | G | 0.94 | 0.85 | 1.04 | 1.98E-01 | 1.72E-01 |
| 6 | rs1573649  | 32731258 | T | 0.50 | 0.50 | C | 1.03 | 0.94 | 1.13 | 4.96E-01 | 5.07E-01 |
| 6 | rs6903130  | 32732210 | A | 0.50 | 0.50 | G | 1.03 | 0.94 | 1.13 | 4.77E-01 | 4.86E-01 |
| 6 | rs9348894  | 32732677 | T | 0.30 | 0.31 | A | 0.94 | 0.85 | 1.04 | 2.41E-01 | 2.09E-01 |
| 6 | rs1894412  | 32734829 | A | 0.50 | 0.50 | G | 1.03 | 0.94 | 1.13 | 5.07E-01 | 5.17E-01 |
| 6 | rs6901084  | 32736936 | T | 0.44 | 0.43 | C | 1.04 | 0.95 | 1.14 | 4.07E-01 | 4.38E-01 |
| 6 | rs6457661  | 32737494 | T | 0.44 | 0.43 | C | 1.04 | 0.95 | 1.14 | 3.99E-01 | 4.29E-01 |
| 6 | rs9368741  | 32737507 | A | 0.30 | 0.31 | G | 0.94 | 0.85 | 1.04 | 2.04E-01 | 1.79E-01 |
| 6 | rs6457663  | 32739312 | A | 0.07 | 0.07 | T | 1.01 | 0.84 | 1.22 | 8.90E-01 | 8.33E-01 |
| 6 | rs1383265  | 32739888 | G | 0.20 | 0.20 | A | 0.97 | 0.86 | 1.09 | 6.00E-01 | 6.20E-01 |
| 6 | rs2857211  | 32740442 | T | 0.33 | 0.34 | C | 0.96 | 0.87 | 1.06 | 4.16E-01 | 4.52E-01 |
| 6 | rs2857210  | 32741742 | T | 0.30 | 0.31 | C | 0.95 | 0.86 | 1.05 | 3.23E-01 | 3.37E-01 |
| 6 | rs28724890 | 32741844 | A | 0.03 | 0.03 | G | 0.99 | 0.76 | 1.29 | 9.35E-01 | 9.38E-01 |
| 6 | rs12663317 | 32742827 | C | 0.09 | 0.07 | A | 1.26 | 1.07 | 1.49 | 5.63E-03 | 5.61E-03 |
| 6 | rs9276615  | 32743217 | C | 0.30 | 0.31 | T | 0.95 | 0.86 | 1.05 | 3.47E-01 | 3.70E-01 |
| 6 | rs13195441 | 32743298 | A | 0.26 | 0.27 | G | 0.95 | 0.85 | 1.05 | 2.93E-01 | 2.54E-01 |
| 6 | rs2857204  | 32744347 | A | 0.35 | 0.34 | C | 1.03 | 0.94 | 1.14 | 5.44E-01 | 5.98E-01 |
| 6 | rs9276644  | 32745043 | C | 0.35 | 0.34 | T | 1.01 | 0.92 | 1.12 | 7.71E-01 | 7.31E-01 |
| 6 | rs28986337 | 32748398 | T | 0.09 | 0.07 | C | 1.26 | 1.07 | 1.49 | 6.39E-03 | 6.36E-03 |
| 6 | rs34043227 | 32748590 | T | 0.08 | 0.05 | C | 1.63 | 1.35 | 1.97 | 2.99E-07 | 1.90E-07 |
| 6 | rs28986338 | 32748810 | T | 0.09 | 0.07 | C | 1.26 | 1.07 | 1.49 | 5.63E-03 | 5.60E-03 |
| 6 | rs28986359 | 32751349 | C | 0.09 | 0.07 | G | 1.26 | 1.07 | 1.49 | 5.63E-03 | 5.62E-03 |
| 6 | rs28986364 | 32751691 | C | 0.09 | 0.07 | A | 1.35 | 1.13 | 1.60 | 7.67E-04 | 6.81E-04 |
| 6 | rs719654   | 32752139 | T | 0.20 | 0.21 | C | 0.96 | 0.85 | 1.07 | 4.46E-01 | 3.97E-01 |

|   |            |          |   |      |      |   |      |      |      |          |          |
|---|------------|----------|---|------|------|---|------|------|------|----------|----------|
| 6 | rs28986373 | 32752150 | A | 0.09 | 0.07 | C | 1.26 | 1.07 | 1.49 | 5.80E-03 | 5.83E-03 |
| 6 | rs13204139 | 32752685 | A | 0.09 | 0.07 | G | 1.27 | 1.07 | 1.50 | 5.00E-03 | 4.96E-03 |
| 6 | rs28986396 | 32754430 | A | 0.09 | 0.07 | G | 1.26 | 1.07 | 1.49 | 5.89E-03 | 5.89E-03 |
| 6 | rs7762279  | 32755290 | C | 0.07 | 0.09 | T | 0.69 | 0.58 | 0.83 | 4.77E-05 | 5.89E-05 |
| 6 | rs9276711  | 32757297 | T | 0.35 | 0.35 | C | 1.02 | 0.92 | 1.12 | 7.54E-01 | 7.38E-01 |
| 6 | rs2857167  | 32757396 | T | 0.30 | 0.31 | C | 0.96 | 0.87 | 1.06 | 4.15E-01 | 4.30E-01 |
| 6 | rs2621388  | 32757938 | T | 0.30 | 0.31 | C | 0.95 | 0.86 | 1.05 | 3.55E-01 | 3.79E-01 |
| 6 | rs7758736  | 32758394 | A | 0.16 | 0.17 | G | 0.94 | 0.83 | 1.07 | 3.31E-01 | 3.53E-01 |
| 6 | rs3948793  | 32759448 | T | 0.35 | 0.35 | C | 1.01 | 0.92 | 1.11 | 8.41E-01 | 8.11E-01 |
| 6 | rs2157079  | 32762103 | A | 0.37 | 0.36 | G | 1.07 | 0.97 | 1.18 | 1.61E-01 | 1.33E-01 |
| 6 | rs9276722  | 32762391 | G | 0.09 | 0.07 | A | 1.26 | 1.07 | 1.48 | 6.44E-03 | 6.68E-03 |
| 6 | rs2621377  | 32763110 | G | 0.46 | 0.43 | A | 1.14 | 1.04 | 1.25 | 4.70E-03 | 3.53E-03 |
| 6 | rs2857151  | 32763514 | T | 0.37 | 0.36 | C | 1.07 | 0.97 | 1.18 | 1.65E-01 | 1.36E-01 |
| 6 | rs9276726  | 32763888 | C | 0.31 | 0.33 | T | 0.89 | 0.81 | 0.98 | 2.16E-02 | 1.91E-02 |
| 6 | rs2621373  | 32765130 | G | 0.31 | 0.30 | A | 1.02 | 0.93 | 1.13 | 6.49E-01 | 7.03E-01 |
| 6 | rs7767167  | 32765182 | G | 0.10 | 0.13 | A | 0.72 | 0.62 | 0.84 | 1.32E-05 | 1.59E-05 |
| 6 | rs6912002  | 32765268 | C | 0.32 | 0.34 | T | 0.91 | 0.83 | 1.00 | 5.76E-02 | 5.47E-02 |
| 6 | rs1383261  | 32765451 | A | 0.32 | 0.34 | G | 0.91 | 0.83 | 1.01 | 6.66E-02 | 6.36E-02 |
| 6 | rs6932969  | 32765671 | G | 0.32 | 0.34 | C | 0.91 | 0.83 | 1.01 | 6.66E-02 | 6.36E-02 |
| 6 | rs7383606  | 32766593 | T | 0.32 | 0.34 | C | 0.91 | 0.83 | 1.01 | 6.49E-02 | 6.19E-02 |
| 6 | rs9276734  | 32766854 | A | 0.32 | 0.34 | G | 0.91 | 0.83 | 1.01 | 6.66E-02 | 6.36E-02 |
| 6 | rs2199874  | 32769926 | C | 0.32 | 0.31 | T | 1.04 | 0.94 | 1.15 | 4.02E-01 | 4.34E-01 |
| 6 | rs2621358  | 32770808 | A | 0.31 | 0.30 | G | 1.02 | 0.92 | 1.13 | 6.77E-01 | 7.36E-01 |
| 6 | rs2857143  | 32772636 | T | 0.37 | 0.35 | C | 1.06 | 0.96 | 1.17 | 2.54E-01 | 2.03E-01 |
| 6 | rs2199870  | 32773172 | G | 0.37 | 0.36 | A | 1.07 | 0.97 | 1.18 | 1.69E-01 | 1.40E-01 |
| 6 | rs7382619  | 32775809 | T | 0.32 | 0.34 | C | 0.90 | 0.82 | 0.99 | 3.71E-02 | 3.53E-02 |
| 6 | rs12207915 | 32777752 | C | 0.07 | 0.06 | T | 1.21 | 1.01 | 1.45 | 4.32E-02 | 4.72E-02 |
| 6 | rs7383433  | 32778531 | A | 0.37 | 0.36 | G | 1.07 | 0.97 | 1.18 | 1.65E-01 | 1.36E-01 |
| 6 | rs2621332  | 32780317 | C | 0.37 | 0.36 | T | 1.07 | 0.97 | 1.18 | 1.55E-01 | 1.28E-01 |
| 6 | rs2621331  | 32780470 | G | 0.39 | 0.37 | A | 1.10 | 1.00 | 1.20 | 6.07E-02 | 4.75E-02 |
| 6 | rs11244    | 32780724 | T | 0.26 | 0.27 | C | 0.93 | 0.84 | 1.03 | 1.84E-01 | 1.52E-01 |
| 6 | rs2621330  | 32781524 | A | 0.04 | 0.04 | G | 0.95 | 0.75 | 1.20 | 6.45E-01 | 6.41E-01 |
| 6 | rs2070121  | 32781554 | T | 0.08 | 0.08 | C | 0.88 | 0.74 | 1.04 | 1.40E-01 | 1.74E-01 |
| 6 | rs2856997  | 32781776 | T | 0.41 | 0.42 | G | 0.97 | 0.88 | 1.07 | 5.26E-01 | 4.87E-01 |



|   |            |          |   |      |      |   |      |      |      |          |          |
|---|------------|----------|---|------|------|---|------|------|------|----------|----------|
| 6 | rs2071474  | 32782582 | A | 0.29 | 0.28 | G | 1.05 | 0.95 | 1.16 | 3.38E-01 | 3.81E-01 |
| 6 | rs2071473  | 32782605 | A | 0.35 | 0.35 | G | 0.98 | 0.89 | 1.09 | 7.57E-01 | 6.61E-01 |
| 6 | rs7383287  | 32783086 | G | 0.20 | 0.21 | A | 0.95 | 0.84 | 1.06 | 3.32E-01 | 3.42E-01 |
| 6 | rs2071472  | 32784620 | A | 0.29 | 0.28 | G | 1.05 | 0.95 | 1.17 | 3.11E-01 | 3.49E-01 |
| 6 | rs2071554  | 32784676 | A | 0.04 | 0.05 | G | 0.82 | 0.66 | 1.03 | 9.40E-02 | 7.27E-02 |
| 6 | rs2071469  | 32784783 | A | 0.36 | 0.36 | G | 0.98 | 0.89 | 1.08 | 6.46E-01 | 6.20E-01 |
| 6 | rs2857107  | 32785515 | A | 0.12 | 0.11 | G | 1.10 | 0.95 | 1.27 | 1.90E-01 | 1.90E-01 |
| 6 | rs17429444 | 32786068 | G | 0.12 | 0.11 | A | 1.10 | 0.95 | 1.26 | 2.15E-01 | 2.42E-01 |
| 6 | rs1894406  | 32787056 | A | 0.33 | 0.34 | G | 0.98 | 0.89 | 1.08 | 7.24E-01 | 7.10E-01 |
| 6 | rs17220136 | 32787337 | T | 0.05 | 0.06 | C | 0.81 | 0.65 | 1.01 | 5.75E-02 | 7.04E-02 |
| 6 | rs2857106  | 32787570 | G | 0.17 | 0.17 | A | 0.97 | 0.86 | 1.10 | 6.21E-01 | 5.75E-01 |
| 6 | rs9784758  | 32788511 | C | 0.05 | 0.07 | T | 0.78 | 0.64 | 0.95 | 1.22E-02 | 8.99E-03 |
| 6 | rs9784876  | 32788878 | A | 0.05 | 0.07 | C | 0.78 | 0.64 | 0.95 | 1.22E-02 | 8.99E-03 |
| 6 | rs2621321  | 32789480 | C | 0.26 | 0.25 | T | 1.09 | 0.98 | 1.21 | 1.32E-01 | 1.50E-01 |
| 6 | rs16870907 | 32789807 | T | 0.05 | 0.06 | C | 0.77 | 0.63 | 0.95 | 1.21E-02 | 9.72E-03 |
| 6 | rs16870914 | 32791774 | C | 0.02 | 0.02 | G | 0.67 | 0.47 | 0.94 | 2.04E-02 | 2.32E-02 |
| 6 | rs13209654 | 32792659 | C | 0.09 | 0.07 | T | 1.26 | 1.07 | 1.49 | 5.86E-03 | 5.98E-03 |
| 6 | rs16870923 | 32792693 | C | 0.02 | 0.02 | T | 0.68 | 0.49 | 0.96 | 2.53E-02 | 2.93E-02 |
| 6 | rs10484565 | 32795032 | A | 0.08 | 0.09 | G | 0.89 | 0.75 | 1.05 | 1.63E-01 | 1.65E-01 |
| 6 | rs241453   | 32796226 | T | 0.27 | 0.25 | C | 1.10 | 0.99 | 1.22 | 8.02E-02 | 9.13E-02 |
| 6 | rs241452   | 32796346 | G | 0.27 | 0.25 | A | 1.10 | 0.99 | 1.22 | 7.33E-02 | 8.32E-02 |
| 6 | rs241451   | 32796480 | G | 0.31 | 0.31 | A | 1.03 | 0.93 | 1.14 | 5.80E-01 | 6.60E-01 |
| 6 | rs17034    | 32796521 | A | 0.26 | 0.25 | G | 1.08 | 0.97 | 1.20 | 1.46E-01 | 1.67E-01 |
| 6 | rs241448   | 32796685 | C | 0.27 | 0.25 | T | 1.10 | 0.99 | 1.22 | 8.74E-02 | 9.70E-02 |
| 6 | rs241447   | 32796751 | G | 0.27 | 0.25 | A | 1.09 | 0.98 | 1.21 | 1.18E-01 | 1.36E-01 |
| 6 | rs4148876  | 32796793 | T | 0.09 | 0.07 | C | 1.26 | 1.07 | 1.49 | 5.16E-03 | 5.48E-03 |
| 6 | rs241446   | 32796967 | T | 0.27 | 0.25 | C | 1.10 | 0.99 | 1.22 | 7.17E-02 | 8.36E-02 |
| 6 | rs241445   | 32797072 | A | 0.27 | 0.25 | G | 1.10 | 0.99 | 1.22 | 8.08E-02 | 9.25E-02 |
| 6 | rs241440   | 32797361 | A | 0.27 | 0.25 | G | 1.11 | 1.00 | 1.24 | 4.42E-02 | 5.21E-02 |
| 6 | rs241439   | 32797537 | C | 0.37 | 0.37 | A | 1.00 | 0.91 | 1.10 | 9.69E-01 | 9.92E-01 |
| 6 | rs241438   | 32797620 | A | 0.33 | 0.33 | G | 0.99 | 0.90 | 1.10 | 8.84E-01 | 8.65E-01 |
| 6 | rs241437   | 32797684 | C | 0.37 | 0.37 | T | 1.00 | 0.91 | 1.10 | 1.00E+00 | 9.89E-01 |
| 6 | rs241436   | 32797876 | C | 0.45 | 0.45 | T | 1.00 | 0.91 | 1.10 | 9.96E-01 | 9.16E-01 |
| 6 | rs9380326  | 32798283 | C | 0.10 | 0.11 | T | 0.84 | 0.72 | 0.98 | 2.34E-02 | 1.99E-02 |

|   |            |          |   |      |      |   |      |      |      |          |          |
|---|------------|----------|---|------|------|---|------|------|------|----------|----------|
| 6 | rs1015166  | 32798731 | T | 0.29 | 0.32 | C | 0.87 | 0.78 | 0.96 | 5.32E-03 | 5.72E-03 |
| 6 | rs241433   | 32798795 | G | 0.44 | 0.41 | T | 1.14 | 1.04 | 1.25 | 7.31E-03 | 6.14E-03 |
| 6 | rs2228397  | 32800224 | T | 0.24 | 0.23 | G | 1.04 | 0.93 | 1.16 | 5.29E-01 | 5.93E-01 |
| 6 | rs1800454  | 32800412 | A | 0.17 | 0.15 | G | 1.16 | 1.02 | 1.31 | 2.53E-02 | 1.65E-02 |
| 6 | rs241430   | 32802820 | A | 0.43 | 0.41 | G | 1.12 | 1.02 | 1.23 | 2.21E-02 | 1.74E-02 |
| 6 | rs4148871  | 32803316 | T | 0.23 | 0.21 | C | 1.11 | 0.99 | 1.24 | 7.55E-02 | 8.21E-02 |
| 6 | rs241429   | 32803840 | T | 0.44 | 0.44 | C | 0.97 | 0.89 | 1.07 | 5.65E-01 | 7.25E-01 |
| 6 | rs3819715  | 32804219 | T | 0.35 | 0.34 | G | 1.07 | 0.97 | 1.18 | 1.68E-01 | 2.03E-01 |
| 6 | rs241427   | 32804414 | T | 0.34 | 0.34 | C | 0.97 | 0.88 | 1.07 | 5.68E-01 | 5.81E-01 |
| 6 | rs3819721  | 32804798 | A | 0.29 | 0.25 | G | 1.26 | 1.14 | 1.40 | 8.32E-06 | 6.91E-06 |
| 6 | rs241425   | 32804909 | T | 0.41 | 0.43 | C | 0.93 | 0.85 | 1.02 | 1.22E-01 | 1.12E-01 |
| 6 | rs241424   | 32804934 | T | 0.43 | 0.45 | C | 0.92 | 0.84 | 1.01 | 8.22E-02 | 8.61E-02 |
| 6 | rs2071544  | 32806121 | A | 0.47 | 0.51 | G | 0.84 | 0.77 | 0.92 | 2.10E-04 | 1.99E-04 |
| 6 | rs4148870  | 32806391 | A | 0.49 | 0.44 | G | 1.19 | 1.09 | 1.31 | 1.43E-04 | 1.27E-04 |
| 6 | rs3763366  | 32807446 | G | 0.47 | 0.51 | C | 0.86 | 0.78 | 0.94 | 1.03E-03 | 9.12E-04 |
| 6 | rs3763349  | 32808232 | T | 0.44 | 0.48 | C | 0.87 | 0.79 | 0.95 | 2.62E-03 | 2.39E-03 |
| 6 | rs9357155  | 32809848 | A | 0.14 | 0.12 | G | 1.16 | 1.01 | 1.33 | 3.60E-02 | 3.62E-02 |
| 6 | rs6924102  | 32811383 | G | 0.48 | 0.43 | A | 1.19 | 1.08 | 1.30 | 2.60E-04 | 2.46E-04 |
| 6 | rs2071543  | 32811629 | A | 0.15 | 0.13 | C | 1.16 | 1.02 | 1.33 | 2.59E-02 | 2.54E-02 |
| 6 | rs2071541  | 32812858 | C | 0.11 | 0.12 | T | 0.92 | 0.79 | 1.06 | 2.32E-01 | 2.72E-01 |
| 6 | rs2071540  | 32812916 | A | 0.38 | 0.42 | G | 0.87 | 0.79 | 0.95 | 3.31E-03 | 2.68E-03 |
| 6 | rs8842     | 32813161 | G | 0.03 | 0.03 | C | 0.86 | 0.65 | 1.14 | 3.04E-01 | 2.82E-01 |
| 6 | rs1057373  | 32813279 | T | 0.08 | 0.09 | G | 0.88 | 0.75 | 1.04 | 1.27E-01 | 1.53E-01 |
| 6 | rs13215    | 32813852 | T | 0.06 | 0.06 | G | 0.98 | 0.80 | 1.19 | 8.15E-01 | 7.99E-01 |
| 6 | rs4711312  | 32814659 | G | 0.14 | 0.15 | A | 0.91 | 0.80 | 1.04 | 1.49E-01 | 1.73E-01 |
| 6 | rs1135216  | 32814975 | G | 0.14 | 0.15 | A | 0.91 | 0.80 | 1.04 | 1.57E-01 | 1.81E-01 |
| 6 | rs17213812 | 32815516 | T | 0.06 | 0.06 | C | 0.97 | 0.80 | 1.18 | 7.80E-01 | 7.83E-01 |
| 6 | rs2071482  | 32816700 | T | 0.14 | 0.15 | G | 0.97 | 0.85 | 1.10 | 6.13E-01 | 6.89E-01 |
| 6 | rs12527715 | 32816998 | C | 0.17 | 0.17 | T | 1.02 | 0.90 | 1.15 | 7.58E-01 | 6.75E-01 |
| 6 | rs2395269  | 32817774 | G | 0.14 | 0.14 | T | 1.00 | 0.88 | 1.14 | 9.56E-01 | 8.33E-01 |
| 6 | rs2127680  | 32818031 | C | 0.03 | 0.03 | T | 1.06 | 0.81 | 1.39 | 6.79E-01 | 6.41E-01 |
| 6 | rs2071538  | 32818678 | T | 0.20 | 0.22 | C | 0.90 | 0.81 | 1.01 | 7.44E-02 | 6.75E-02 |
| 6 | rs1057141  | 32818774 | G | 0.17 | 0.17 | A | 0.98 | 0.87 | 1.11 | 7.99E-01 | 8.87E-01 |
| 6 | rs2071481  | 32819865 | G | 0.11 | 0.11 | A | 0.99 | 0.85 | 1.14 | 8.57E-01 | 9.80E-01 |

|   |            |          |   |      |      |   |      |      |      |          |          |
|---|------------|----------|---|------|------|---|------|------|------|----------|----------|
| 6 | rs1351383  | 32822269 | G | 0.45 | 0.42 | T | 1.10 | 1.01 | 1.21 | 3.81E-02 | 3.39E-02 |
| 6 | rs4713600  | 32822858 | T | 0.45 | 0.42 | G | 1.10 | 1.01 | 1.21 | 3.47E-02 | 3.10E-02 |
| 6 | rs991760   | 32823567 | T | 0.07 | 0.07 | C | 1.03 | 0.86 | 1.24 | 7.13E-01 | 6.27E-01 |
| 6 | rs17587    | 32825090 | A | 0.30 | 0.28 | G | 1.10 | 0.99 | 1.21 | 7.52E-02 | 7.93E-02 |
| 6 | rs2071477  | 32825348 | G | 0.45 | 0.42 | A | 1.11 | 1.01 | 1.21 | 3.37E-02 | 3.03E-02 |
| 6 | rs9276815  | 32825507 | T | 0.35 | 0.33 | C | 1.12 | 1.01 | 1.23 | 2.44E-02 | 2.35E-02 |
| 6 | rs241418   | 32827356 | T | 0.02 | 0.03 | C | 0.92 | 0.69 | 1.24 | 5.85E-01 | 6.28E-01 |
| 6 | rs241417   | 32827916 | G | 0.02 | 0.03 | A | 0.93 | 0.69 | 1.25 | 6.27E-01 | 6.64E-01 |
| 6 | rs9276825  | 32829714 | A | 0.47 | 0.45 | G | 1.09 | 0.99 | 1.19 | 7.09E-02 | 6.17E-02 |
| 6 | rs7767288  | 32830013 | A | 0.45 | 0.42 | G | 1.11 | 1.01 | 1.21 | 3.26E-02 | 2.89E-02 |
| 6 | rs7766900  | 32830034 | G | 0.47 | 0.45 | A | 1.09 | 0.99 | 1.19 | 6.86E-02 | 5.97E-02 |
| 6 | rs9276831  | 32832033 | G | 0.14 | 0.14 | A | 1.04 | 0.91 | 1.18 | 6.03E-01 | 6.32E-01 |
| 6 | rs3752430  | 32832667 | A | 0.39 | 0.42 | G | 0.86 | 0.78 | 0.94 | 1.16E-03 | 9.55E-04 |
| 6 | rs1383267  | 32833646 | T | 0.45 | 0.42 | C | 1.11 | 1.01 | 1.22 | 2.86E-02 | 2.57E-02 |
| 6 | rs10484566 | 32835258 | G | 0.07 | 0.06 | T | 1.08 | 0.89 | 1.30 | 4.38E-01 | 3.69E-01 |
| 6 | rs6931062  | 32835615 | A | 0.38 | 0.36 | C | 1.10 | 1.00 | 1.21 | 5.14E-02 | 5.40E-02 |
| 6 | rs9276835  | 32837129 | A | 0.38 | 0.36 | T | 1.10 | 1.00 | 1.20 | 5.84E-02 | 6.03E-02 |
| 6 | rs6906376  | 32838584 | A | 0.38 | 0.36 | C | 1.09 | 0.99 | 1.20 | 6.59E-02 | 6.73E-02 |
| 6 | rs6929078  | 32838664 | C | 0.38 | 0.36 | T | 1.09 | 0.99 | 1.20 | 7.53E-02 | 7.61E-02 |
| 6 | rs9276845  | 32840139 | G | 0.39 | 0.36 | A | 1.10 | 1.00 | 1.21 | 5.38E-02 | 5.56E-02 |
| 6 | rs9276857  | 32841319 | C | 0.38 | 0.36 | T | 1.08 | 0.98 | 1.19 | 1.08E-01 | 1.09E-01 |
| 6 | rs241415   | 32842691 | C | 0.02 | 0.03 | A | 0.91 | 0.67 | 1.22 | 5.18E-01 | 5.58E-01 |
| 6 | rs28724900 | 32844032 | T | 0.03 | 0.03 | C | 1.01 | 0.78 | 1.32 | 9.18E-01 | 9.15E-01 |
| 6 | rs7757767  | 32845873 | G | 0.38 | 0.36 | A | 1.09 | 0.99 | 1.20 | 6.89E-02 | 7.02E-02 |
| 6 | rs9276894  | 32846483 | C | 0.38 | 0.36 | G | 1.10 | 1.00 | 1.21 | 5.19E-02 | 5.39E-02 |
| 6 | rs9276900  | 32848566 | C | 0.38 | 0.36 | A | 1.11 | 1.01 | 1.22 | 3.60E-02 | 3.78E-02 |
| 6 | rs2127675  | 32850850 | C | 0.39 | 0.36 | T | 1.10 | 1.00 | 1.21 | 4.72E-02 | 4.91E-02 |
| 6 | rs17220297 | 32852052 | T | 0.02 | 0.02 | G | 1.04 | 0.76 | 1.42 | 7.97E-01 | 7.45E-01 |
| 6 | rs1002985  | 32852448 | T | 0.03 | 0.05 | C | 0.66 | 0.52 | 0.83 | 5.20E-04 | 5.64E-04 |
| 6 | rs7766964  | 32852928 | T | 0.09 | 0.09 | A | 0.99 | 0.85 | 1.16 | 9.16E-01 | 9.58E-01 |
| 6 | rs35571244 | 32853219 | C | 0.10 | 0.07 | T | 1.54 | 1.30 | 1.81 | 2.35E-07 | 2.71E-07 |
| 6 | rs10046115 | 32855174 | G | 0.11 | 0.11 | A | 0.97 | 0.84 | 1.13 | 7.07E-01 | 7.53E-01 |
| 6 | rs6457689  | 32855683 | T | 0.11 | 0.11 | C | 0.97 | 0.84 | 1.13 | 7.02E-01 | 7.48E-01 |
| 6 | rs10214759 | 32857295 | T | 0.02 | 0.03 | G | 0.88 | 0.66 | 1.19 | 4.20E-01 | 3.57E-01 |

|   |            |          |   |      |      |   |      |      |      |          |          |
|---|------------|----------|---|------|------|---|------|------|------|----------|----------|
| 6 | rs10214886 | 32857419 | A | 0.11 | 0.11 | T | 0.97 | 0.83 | 1.12 | 6.41E-01 | 6.92E-01 |
| 6 | rs9276913  | 32857496 | G | 0.42 | 0.46 | A | 0.86 | 0.78 | 0.94 | 1.03E-03 | 8.60E-04 |
| 6 | rs9469300  | 32860752 | A | 0.11 | 0.11 | G | 0.98 | 0.84 | 1.14 | 7.87E-01 | 8.23E-01 |
| 6 | rs241409   | 32861920 | C | 0.11 | 0.09 | T | 1.21 | 1.04 | 1.41 | 1.15E-02 | 1.35E-02 |
| 6 | rs241407   | 32862740 | A | 0.11 | 0.09 | G | 1.20 | 1.03 | 1.39 | 1.63E-02 | 1.86E-02 |
| 6 | rs12195238 | 32862910 | T | 0.04 | 0.02 | A | 1.57 | 1.20 | 2.06 | 1.01E-03 | 8.87E-04 |
| 6 | rs11961569 | 32864681 | G | 0.08 | 0.08 | T | 1.01 | 0.85 | 1.19 | 9.15E-01 | 8.22E-01 |
| 6 | rs11969321 | 32864890 | C | 0.08 | 0.08 | G | 1.02 | 0.86 | 1.20 | 8.57E-01 | 7.65E-01 |
| 6 | rs17508331 | 32865338 | C | 0.08 | 0.08 | T | 1.01 | 0.85 | 1.19 | 9.18E-01 | 8.26E-01 |
| 6 | rs241405   | 32865798 | T | 0.45 | 0.49 | C | 0.85 | 0.78 | 0.93 | 4.44E-04 | 3.26E-04 |
| 6 | rs9276915  | 32865911 | A | 0.29 | 0.27 | G | 1.10 | 0.99 | 1.22 | 6.37E-02 | 6.43E-02 |
| 6 | rs241404   | 32865997 | G | 0.46 | 0.42 | A | 1.19 | 1.08 | 1.30 | 2.12E-04 | 2.08E-04 |
| 6 | rs9501233  | 32867123 | A | 0.08 | 0.08 | G | 1.03 | 0.87 | 1.21 | 7.72E-01 | 6.95E-01 |
| 6 | rs9461818  | 32867859 | G | 0.08 | 0.08 | A | 1.01 | 0.85 | 1.19 | 9.14E-01 | 8.23E-01 |
| 6 | rs10080898 | 32869882 | C | 0.08 | 0.08 | A | 1.01 | 0.86 | 1.20 | 8.91E-01 | 8.01E-01 |
| 6 | rs9296057  | 32869915 | G | 0.08 | 0.08 | A | 1.02 | 0.86 | 1.20 | 8.37E-01 | 7.47E-01 |
| 6 | rs3101942  | 32870057 | C | 0.37 | 0.39 | T | 0.89 | 0.81 | 0.98 | 1.28E-02 | 9.88E-03 |
| 6 | rs1591     | 32871317 | G | 0.08 | 0.08 | T | 1.01 | 0.86 | 1.19 | 9.10E-01 | 8.19E-01 |
| 6 | rs1585894  | 32875323 | A | 0.08 | 0.08 | C | 1.01 | 0.85 | 1.19 | 9.14E-01 | 8.23E-01 |
| 6 | rs241398   | 32875450 | A | 0.46 | 0.42 | G | 1.19 | 1.09 | 1.31 | 1.64E-04 | 1.63E-04 |
| 6 | rs9501234  | 32876049 | G | 0.08 | 0.08 | A | 1.02 | 0.86 | 1.21 | 8.09E-01 | 7.32E-01 |
| 6 | rs9500926  | 32876514 | C | 0.08 | 0.08 | T | 1.01 | 0.85 | 1.19 | 9.14E-01 | 8.23E-01 |
| 6 | rs1978030  | 32877073 | C | 0.08 | 0.08 | T | 1.01 | 0.86 | 1.19 | 9.10E-01 | 8.19E-01 |
| 6 | rs154988   | 32877266 | C | 0.45 | 0.49 | T | 0.85 | 0.78 | 0.93 | 3.93E-04 | 2.92E-04 |
| 6 | rs386542   | 32877768 | T | 0.08 | 0.08 | A | 1.01 | 0.86 | 1.19 | 9.10E-01 | 8.19E-01 |
| 6 | rs154986   | 32879233 | A | 0.08 | 0.08 | C | 1.02 | 0.87 | 1.21 | 7.86E-01 | 7.14E-01 |
| 6 | rs9469311  | 32880295 | G | 0.02 | 0.02 | A | 0.81 | 0.58 | 1.13 | 2.18E-01 | 2.37E-01 |
| 6 | rs9276921  | 32881502 | G | 0.14 | 0.13 | A | 1.04 | 0.91 | 1.19 | 5.37E-01 | 5.49E-01 |
| 6 | rs9276922  | 32881527 | A | 0.19 | 0.21 | T | 0.91 | 0.81 | 1.02 | 1.21E-01 | 1.07E-01 |
| 6 | rs35599935 | 32886487 | C | 0.10 | 0.07 | T | 1.54 | 1.30 | 1.82 | 3.47E-07 | 4.36E-07 |
| 6 | rs149392   | 32889971 | G | 0.08 | 0.08 | A | 1.03 | 0.87 | 1.21 | 7.63E-01 | 6.85E-01 |
| 6 | rs194679   | 32891338 | A | 0.05 | 0.04 | G | 1.19 | 0.96 | 1.49 | 1.17E-01 | 9.92E-02 |
| 6 | rs151724   | 32892688 | C | 0.03 | 0.04 | T | 0.88 | 0.68 | 1.14 | 3.46E-01 | 3.60E-01 |
| 6 | rs9296059  | 32893102 | C | 0.09 | 0.09 | A | 1.02 | 0.86 | 1.20 | 8.55E-01 | 7.67E-01 |

|   |            |          |   |      |      |   |      |      |      |          |          |
|---|------------|----------|---|------|------|---|------|------|------|----------|----------|
| 6 | rs9469312  | 32893289 | A | 0.05 | 0.04 | G | 1.20 | 0.96 | 1.49 | 1.07E-01 | 9.00E-02 |
| 6 | rs9501239  | 32895580 | G | 0.05 | 0.04 | A | 1.13 | 0.91 | 1.41 | 2.81E-01 | 2.38E-01 |
| 6 | rs1116029  | 32895984 | T | 0.05 | 0.04 | C | 1.21 | 0.97 | 1.50 | 9.10E-02 | 7.32E-02 |
| 6 | rs154978   | 32899296 | G | 0.42 | 0.48 | A | 0.80 | 0.73 | 0.88 | 2.23E-06 | 1.60E-06 |
| 6 | rs3132131  | 32899485 | A | 0.28 | 0.33 | G | 0.82 | 0.74 | 0.91 | 9.16E-05 | 5.53E-05 |
| 6 | rs154973   | 32900642 | A | 0.11 | 0.10 | G | 1.05 | 0.91 | 1.22 | 5.01E-01 | 4.66E-01 |
| 6 | rs154972   | 32900651 | C | 0.41 | 0.40 | T | 1.05 | 0.96 | 1.15 | 3.15E-01 | 2.83E-01 |
| 6 | rs181997   | 32900718 | T | 0.33 | 0.35 | C | 0.92 | 0.84 | 1.02 | 1.15E-01 | 1.19E-01 |
| 6 | rs3129299  | 32900787 | A | 0.18 | 0.18 | G | 1.02 | 0.91 | 1.15 | 7.25E-01 | 7.07E-01 |
| 6 | rs3132132  | 32901934 | A | 0.15 | 0.14 | G | 1.03 | 0.90 | 1.17 | 6.76E-01 | 7.19E-01 |
| 6 | rs12662077 | 32902001 | A | 0.09 | 0.06 | G | 1.46 | 1.22 | 1.74 | 2.76E-05 | 2.92E-05 |
| 6 | rs23544    | 32903637 | A | 0.45 | 0.43 | G | 1.07 | 0.98 | 1.17 | 1.53E-01 | 1.81E-01 |
| 6 | rs68600    | 32903724 | A | 0.46 | 0.44 | G | 1.08 | 0.99 | 1.19 | 9.63E-02 | 1.13E-01 |
| 6 | rs151719   | 32903900 | G | 0.21 | 0.24 | A | 0.84 | 0.75 | 0.94 | 2.26E-03 | 2.44E-03 |
| 6 | rs2071556  | 32904601 | C | 0.43 | 0.41 | A | 1.08 | 0.99 | 1.19 | 9.27E-02 | 8.86E-02 |
| 6 | rs171329   | 32904661 | C | 0.48 | 0.48 | T | 1.02 | 0.93 | 1.11 | 7.44E-01 | 6.92E-01 |
| 6 | rs1042337  | 32904981 | C | 0.25 | 0.24 | T | 1.05 | 0.95 | 1.17 | 3.42E-01 | 3.52E-01 |
| 6 | rs714289   | 32905811 | C | 0.04 | 0.06 | T | 0.66 | 0.53 | 0.83 | 2.26E-04 | 2.40E-04 |
| 6 | rs6934645  | 32906228 | A | 0.03 | 0.02 | C | 1.25 | 0.94 | 1.66 | 1.21E-01 | 1.23E-01 |
| 6 | rs28365995 | 32909098 | A | 0.03 | 0.03 | G | 0.91 | 0.69 | 1.19 | 4.86E-01 | 5.22E-01 |
| 6 | rs35029304 | 32909533 | C | 0.07 | 0.04 | T | 1.65 | 1.34 | 2.02 | 1.23E-06 | 8.56E-07 |
| 6 | rs16871169 | 32910877 | A | 0.02 | 0.02 | G | 0.77 | 0.55 | 1.07 | 1.21E-01 | 1.15E-01 |
| 6 | rs3101944  | 32911127 | T | 0.11 | 0.09 | C | 1.29 | 1.11 | 1.51 | 1.06E-03 | 9.56E-04 |
| 6 | rs2395296  | 32911814 | A | 0.34 | 0.32 | G | 1.08 | 0.98 | 1.19 | 1.04E-01 | 9.93E-02 |
| 6 | rs10484567 | 32912552 | C | 0.02 | 0.03 | T | 0.96 | 0.72 | 1.28 | 7.77E-01 | 7.30E-01 |
| 6 | rs1480380  | 32913246 | T | 0.06 | 0.07 | C | 0.85 | 0.71 | 1.02 | 8.77E-02 | 1.16E-01 |
| 6 | rs194682   | 32914613 | T | 0.34 | 0.33 | C | 1.08 | 0.98 | 1.19 | 1.28E-01 | 1.62E-01 |
| 6 | rs17583915 | 32915852 | C | 0.03 | 0.03 | T | 0.92 | 0.70 | 1.21 | 5.41E-01 | 5.87E-01 |
| 6 | rs17617515 | 32918124 | T | 0.03 | 0.03 | G | 0.93 | 0.71 | 1.21 | 5.75E-01 | 6.17E-01 |
| 6 | rs3135029  | 32921774 | A | 0.07 | 0.09 | C | 0.79 | 0.66 | 0.93 | 5.72E-03 | 5.00E-03 |
| 6 | rs9378127  | 32922459 | A | 0.13 | 0.12 | G | 1.10 | 0.96 | 1.27 | 1.70E-01 | 1.63E-01 |
| 6 | rs209473   | 32922908 | A | 0.47 | 0.47 | C | 1.03 | 0.94 | 1.13 | 5.70E-01 | 5.28E-01 |
| 6 | rs28724903 | 32924061 | T | 0.10 | 0.09 | C | 1.04 | 0.89 | 1.22 | 6.17E-01 | 5.92E-01 |
| 6 | rs209474   | 32924584 | G | 0.40 | 0.40 | A | 0.99 | 0.90 | 1.09 | 8.38E-01 | 7.33E-01 |

|   |            |          |   |      |      |   |      |      |      |          |          |
|---|------------|----------|---|------|------|---|------|------|------|----------|----------|
| 6 | rs209475   | 32925585 | A | 0.35 | 0.34 | G | 1.08 | 0.98 | 1.19 | 1.38E-01 | 1.79E-01 |
| 6 | rs580962   | 32925692 | G | 0.43 | 0.42 | A | 1.06 | 0.97 | 1.16 | 2.10E-01 | 1.82E-01 |
| 6 | rs6906517  | 32926580 | T | 0.02 | 0.01 | C | 1.58 | 1.08 | 2.32 | 1.78E-02 | 1.90E-02 |
| 6 | rs9276933  | 32930795 | C | 0.09 | 0.10 | T | 0.98 | 0.84 | 1.15 | 8.13E-01 | 9.12E-01 |
| 6 | rs129653   | 32931536 | C | 0.36 | 0.34 | T | 1.08 | 0.98 | 1.19 | 1.29E-01 | 1.79E-01 |
| 6 | rs206783   | 32932150 | A | 0.40 | 0.40 | C | 0.99 | 0.90 | 1.09 | 7.88E-01 | 6.77E-01 |
| 6 | rs17584088 | 32935509 | C | 0.03 | 0.03 | A | 0.91 | 0.70 | 1.18 | 4.78E-01 | 5.25E-01 |
| 6 | rs3918150  | 32936435 | G | 0.03 | 0.03 | C | 0.81 | 0.61 | 1.07 | 1.34E-01 | 1.55E-01 |
| 6 | rs3129296  | 32938291 | C | 0.09 | 0.11 | G | 0.82 | 0.70 | 0.96 | 1.17E-02 | 9.97E-03 |
| 6 | rs16871262 | 32939248 | G | 0.03 | 0.03 | C | 0.91 | 0.70 | 1.19 | 5.09E-01 | 5.51E-01 |
| 6 | rs17220479 | 32940815 | T | 0.03 | 0.03 | C | 0.91 | 0.69 | 1.19 | 4.83E-01 | 4.66E-01 |
| 6 | rs3130597  | 32941191 | T | 0.07 | 0.09 | C | 0.78 | 0.66 | 0.93 | 5.41E-03 | 4.81E-03 |
| 6 | rs12196597 | 32941214 | A | 0.13 | 0.12 | C | 1.10 | 0.96 | 1.27 | 1.78E-01 | 1.68E-01 |
| 6 | rs620202   | 32941910 | T | 0.28 | 0.27 | G | 1.05 | 0.95 | 1.17 | 3.52E-01 | 3.78E-01 |
| 6 | rs3918154  | 32943752 | G | 0.03 | 0.02 | A | 1.30 | 0.98 | 1.73 | 6.60E-02 | 6.63E-02 |
| 6 | rs11908    | 32944746 | T | 0.36 | 0.37 | C | 0.98 | 0.89 | 1.08 | 6.82E-01 | 6.75E-01 |
| 6 | rs3129307  | 32944987 | T | 0.07 | 0.09 | C | 0.78 | 0.66 | 0.93 | 4.91E-03 | 4.40E-03 |
| 6 | rs17220493 | 32945097 | T | 0.01 | 0.01 | C | 0.91 | 0.60 | 1.40 | 6.78E-01 | 6.18E-01 |
| 6 | rs3097644  | 32945530 | G | 0.07 | 0.08 | C | 0.80 | 0.67 | 0.95 | 1.24E-02 | 1.17E-02 |
| 6 | rs565876   | 32950050 | T | 0.36 | 0.37 | C | 0.98 | 0.89 | 1.08 | 7.11E-01 | 7.02E-01 |
| 6 | rs16871297 | 32950217 | G | 0.03 | 0.03 | A | 0.91 | 0.70 | 1.20 | 5.11E-01 | 4.84E-01 |
| 6 | rs17617793 | 32951161 | C | 0.03 | 0.03 | T | 0.91 | 0.70 | 1.19 | 5.11E-01 | 5.53E-01 |
| 6 | rs17220500 | 32951593 | G | 0.03 | 0.03 | C | 0.91 | 0.70 | 1.19 | 5.11E-01 | 5.53E-01 |
| 6 | rs3135034  | 32951662 | C | 0.11 | 0.09 | T | 1.32 | 1.13 | 1.54 | 4.39E-04 | 3.89E-04 |
| 6 | rs206777   | 32952546 | C | 0.42 | 0.41 | T | 1.05 | 0.95 | 1.15 | 3.36E-01 | 2.96E-01 |
| 6 | rs3097645  | 32953280 | G | 0.09 | 0.11 | C | 0.82 | 0.70 | 0.96 | 1.51E-02 | 1.28E-02 |
| 6 | rs206775   | 32954634 | G | 0.37 | 0.37 | T | 0.98 | 0.89 | 1.08 | 6.86E-01 | 6.69E-01 |
| 6 | rs3097646  | 32954689 | C | 0.11 | 0.09 | A | 1.33 | 1.14 | 1.55 | 3.54E-04 | 3.16E-04 |
| 6 | rs188245   | 32955976 | C | 0.43 | 0.45 | T | 0.94 | 0.86 | 1.03 | 2.08E-01 | 2.24E-01 |
| 6 | rs206769   | 32961104 | A | 0.22 | 0.21 | G | 1.04 | 0.93 | 1.16 | 5.09E-01 | 4.43E-01 |
| 6 | rs9500927  | 32961361 | A | 0.15 | 0.15 | G | 1.00 | 0.88 | 1.13 | 9.80E-01 | 8.88E-01 |
| 6 | rs206768   | 32961387 | C | 0.37 | 0.37 | T | 0.98 | 0.89 | 1.08 | 7.21E-01 | 7.07E-01 |
| 6 | rs172275   | 32961621 | T | 0.45 | 0.45 | C | 1.03 | 0.94 | 1.13 | 4.81E-01 | 4.33E-01 |
| 6 | rs206767   | 32962420 | G | 0.48 | 0.48 | T | 1.02 | 0.93 | 1.12 | 6.98E-01 | 6.24E-01 |

|   |            |          |   |      |      |   |      |      |      |          |          |
|---|------------|----------|---|------|------|---|------|------|------|----------|----------|
| 6 | rs206765   | 32964696 | A | 0.37 | 0.37 | T | 0.97 | 0.88 | 1.07 | 5.25E-01 | 4.68E-01 |
| 6 | rs176248   | 32965942 | T | 0.29 | 0.27 | C | 1.08 | 0.98 | 1.20 | 1.23E-01 | 1.12E-01 |
| 6 | rs2395300  | 32968276 | A | 0.31 | 0.33 | G | 0.95 | 0.86 | 1.05 | 3.28E-01 | 3.01E-01 |
| 6 | rs172274   | 32969457 | A | 0.33 | 0.34 | G | 0.96 | 0.87 | 1.06 | 3.96E-01 | 3.69E-01 |
| 6 | rs12193085 | 32969696 | T | 0.13 | 0.14 | C | 0.97 | 0.85 | 1.11 | 6.88E-01 | 5.94E-01 |
| 6 | rs206762   | 32970450 | C | 0.42 | 0.43 | T | 0.95 | 0.87 | 1.04 | 2.79E-01 | 3.03E-01 |
| 6 | rs17214134 | 32971682 | A | 0.01 | 0.01 | G | 1.41 | 0.94 | 2.11 | 9.59E-02 | 7.87E-02 |
| 6 | rs3128931  | 32971708 | A | 0.26 | 0.24 | G | 1.10 | 0.99 | 1.23 | 6.96E-02 | 7.13E-02 |
| 6 | rs1044429  | 32972642 | A | 0.13 | 0.14 | G | 0.97 | 0.85 | 1.11 | 6.68E-01 | 5.79E-01 |
| 6 | rs376892   | 32972887 | T | 0.31 | 0.29 | C | 1.09 | 0.99 | 1.21 | 9.48E-02 | 1.00E-01 |
| 6 | rs35776718 | 32972903 | A | 0.15 | 0.14 | G | 1.14 | 1.00 | 1.30 | 4.53E-02 | 4.29E-02 |
| 6 | rs3129304  | 32973743 | G | 0.15 | 0.16 | A | 0.93 | 0.82 | 1.06 | 2.60E-01 | 2.76E-01 |
| 6 | rs2581     | 32974401 | A | 0.47 | 0.44 | C | 1.11 | 1.01 | 1.22 | 2.65E-02 | 2.46E-02 |
| 6 | rs6913008  | 32974843 | T | 0.18 | 0.16 | C | 1.13 | 1.00 | 1.27 | 5.47E-02 | 5.27E-02 |
| 6 | rs365066   | 32975257 | T | 0.46 | 0.43 | C | 1.11 | 1.01 | 1.21 | 2.95E-02 | 2.50E-02 |
| 6 | rs453779   | 32975381 | T | 0.41 | 0.43 | C | 0.90 | 0.82 | 0.99 | 2.74E-02 | 2.42E-02 |
| 6 | rs2267647  | 32975511 | A | 0.30 | 0.32 | G | 0.91 | 0.82 | 1.01 | 6.81E-02 | 6.04E-02 |
| 6 | rs11575906 | 32975808 | T | 0.01 | 0.01 | C | 0.95 | 0.64 | 1.40 | 7.79E-01 | 7.44E-01 |
| 6 | rs2284191  | 32976654 | A | 0.08 | 0.09 | G | 0.92 | 0.78 | 1.09 | 3.50E-01 | 3.32E-01 |
| 6 | rs86567    | 32976759 | C | 0.43 | 0.43 | A | 1.01 | 0.92 | 1.10 | 9.08E-01 | 8.46E-01 |
| 6 | rs403414   | 32977315 | C | 0.17 | 0.18 | T | 0.92 | 0.81 | 1.04 | 1.73E-01 | 1.92E-01 |
| 6 | rs381218   | 32977420 | A | 0.26 | 0.26 | C | 1.03 | 0.92 | 1.14 | 6.31E-01 | 6.08E-01 |
| 6 | rs396090   | 32977535 | C | 0.44 | 0.47 | T | 0.90 | 0.83 | 0.99 | 3.40E-02 | 3.12E-02 |
| 6 | rs6911639  | 32978178 | C | 0.24 | 0.21 | T | 1.15 | 1.03 | 1.28 | 1.28E-02 | 1.41E-02 |
| 6 | rs429916   | 32978587 | A | 0.06 | 0.07 | C | 0.83 | 0.68 | 1.00 | 4.58E-02 | 6.21E-02 |
| 6 | rs3763342  | 32978997 | A | 0.14 | 0.14 | G | 1.00 | 0.88 | 1.14 | 9.92E-01 | 8.87E-01 |
| 6 | rs3763341  | 32979020 | T | 0.11 | 0.12 | C | 0.92 | 0.79 | 1.06 | 2.41E-01 | 1.78E-01 |
| 6 | rs34354079 | 32981555 | A | 0.09 | 0.08 | G | 1.04 | 0.89 | 1.23 | 6.16E-01 | 6.06E-01 |
| 6 | rs6457699  | 32981647 | T | 0.45 | 0.44 | C | 1.02 | 0.93 | 1.11 | 7.43E-01 | 8.08E-01 |
| 6 | rs9276991  | 32981848 | G | 0.06 | 0.05 | A | 1.09 | 0.90 | 1.33 | 3.60E-01 | 4.17E-01 |
| 6 | rs9276992  | 32981937 | C | 0.06 | 0.05 | T | 1.09 | 0.90 | 1.33 | 3.66E-01 | 4.22E-01 |
| 6 | rs34570277 | 32982017 | T | 0.09 | 0.08 | C | 1.04 | 0.88 | 1.23 | 6.37E-01 | 6.24E-01 |
| 6 | rs423209   | 32983474 | A | 0.03 | 0.04 | G | 0.92 | 0.71 | 1.18 | 4.94E-01 | 5.34E-01 |
| 6 | rs6935846  | 32984011 | T | 0.45 | 0.45 | C | 1.01 | 0.92 | 1.11 | 7.74E-01 | 8.57E-01 |

|   |            |          |   |      |      |   |      |      |      |          |          |
|---|------------|----------|---|------|------|---|------|------|------|----------|----------|
| 6 | rs9276994  | 32984255 | C | 0.37 | 0.36 | T | 1.04 | 0.95 | 1.14 | 4.25E-01 | 4.67E-01 |
| 6 | rs6936620  | 32984451 | A | 0.40 | 0.42 | G | 0.95 | 0.86 | 1.04 | 2.86E-01 | 3.49E-01 |
| 6 | rs3130604  | 32985052 | G | 0.15 | 0.15 | A | 0.94 | 0.83 | 1.07 | 3.46E-01 | 3.78E-01 |
| 6 | rs1367731  | 32985199 | T | 0.18 | 0.16 | C | 1.14 | 1.01 | 1.29 | 3.42E-02 | 3.35E-02 |
| 6 | rs6457701  | 32986573 | G | 0.37 | 0.36 | A | 1.04 | 0.95 | 1.14 | 4.13E-01 | 4.56E-01 |
| 6 | rs6933994  | 32987120 | G | 0.50 | 0.49 | T | 1.02 | 0.93 | 1.12 | 6.46E-01 | 7.32E-01 |
| 6 | rs423639   | 32987774 | T | 0.09 | 0.08 | C | 1.02 | 0.87 | 1.20 | 7.86E-01 | 8.05E-01 |
| 6 | rs6457702  | 32988049 | T | 0.46 | 0.47 | G | 0.97 | 0.88 | 1.06 | 5.08E-01 | 5.64E-01 |
| 6 | rs17220695 | 32988089 | T | 0.05 | 0.05 | C | 1.11 | 0.90 | 1.36 | 3.38E-01 | 3.83E-01 |
| 6 | rs17214311 | 32988175 | A | 0.05 | 0.05 | G | 1.11 | 0.90 | 1.36 | 3.36E-01 | 3.81E-01 |
| 6 | rs9296068  | 32988695 | G | 0.33 | 0.33 | T | 0.99 | 0.90 | 1.10 | 8.74E-01 | 7.70E-01 |
| 6 | rs6930052  | 32990481 | T | 0.04 | 0.04 | A | 1.17 | 0.93 | 1.46 | 1.74E-01 | 1.79E-01 |
| 6 | rs3097648  | 32990970 | T | 0.12 | 0.12 | A | 0.98 | 0.85 | 1.13 | 8.07E-01 | 8.24E-01 |
| 6 | rs13217173 | 32991738 | T | 0.13 | 0.12 | G | 1.09 | 0.95 | 1.25 | 2.39E-01 | 2.34E-01 |
| 6 | rs7738250  | 32992424 | A | 0.09 | 0.08 | G | 1.08 | 0.92 | 1.27 | 3.64E-01 | 3.53E-01 |
| 6 | rs397576   | 32993186 | C | 0.01 | 0.01 | A | 0.96 | 0.65 | 1.42 | 8.40E-01 | 8.29E-01 |
| 6 | rs9277015  | 32993266 | A | 0.36 | 0.34 | G | 1.06 | 0.96 | 1.17 | 2.50E-01 | 3.02E-01 |
| 6 | rs6933546  | 32996014 | T | 0.35 | 0.34 | C | 1.06 | 0.96 | 1.16 | 2.60E-01 | 3.05E-01 |
| 6 | rs443623   | 32996350 | A | 0.24 | 0.24 | T | 0.99 | 0.89 | 1.10 | 8.53E-01 | 8.69E-01 |
| 6 | rs6920606  | 32997674 | C | 0.49 | 0.46 | T | 1.10 | 1.01 | 1.21 | 3.74E-02 | 4.59E-02 |
| 6 | rs9277027  | 32998238 | G | 0.27 | 0.27 | A | 1.01 | 0.91 | 1.12 | 8.03E-01 | 8.72E-01 |
| 6 | rs1431396  | 32998564 | T | 0.38 | 0.39 | C | 0.94 | 0.85 | 1.03 | 2.05E-01 | 2.30E-01 |
| 6 | rs3135195  | 32999330 | C | 0.03 | 0.03 | A | 0.93 | 0.71 | 1.22 | 6.04E-01 | 6.65E-01 |
| 6 | rs429073   | 33001735 | C | 0.17 | 0.17 | T | 0.97 | 0.86 | 1.10 | 6.47E-01 | 6.40E-01 |
| 6 | rs34493748 | 33001771 | C | 0.04 | 0.04 | T | 1.21 | 0.96 | 1.51 | 1.03E-01 | 1.14E-01 |
| 6 | rs2858458  | 33003065 | G | 0.25 | 0.25 | A | 1.01 | 0.91 | 1.12 | 9.00E-01 | 8.75E-01 |
| 6 | rs423196   | 33003562 | G | 0.17 | 0.17 | A | 1.00 | 0.88 | 1.12 | 9.41E-01 | 9.44E-01 |
| 6 | rs448733   | 33003687 | T | 0.05 | 0.05 | G | 0.92 | 0.74 | 1.14 | 4.39E-01 | 4.64E-01 |
| 6 | rs3097656  | 33003745 | T | 0.03 | 0.03 | C | 0.93 | 0.71 | 1.22 | 6.06E-01 | 6.68E-01 |
| 6 | rs763469   | 33004387 | A | 0.15 | 0.15 | G | 0.94 | 0.83 | 1.07 | 3.87E-01 | 4.23E-01 |
| 6 | rs414564   | 33004917 | C | 0.05 | 0.05 | T | 0.93 | 0.75 | 1.15 | 4.96E-01 | 5.23E-01 |
| 6 | rs444821   | 33004935 | A | 0.25 | 0.25 | G | 1.01 | 0.91 | 1.12 | 9.08E-01 | 8.83E-01 |
| 6 | rs9277052  | 33005932 | C | 0.21 | 0.20 | T | 1.03 | 0.92 | 1.15 | 6.11E-01 | 6.01E-01 |
| 6 | rs9277053  | 33006222 | A | 0.28 | 0.28 | G | 1.02 | 0.92 | 1.13 | 7.77E-01 | 8.49E-01 |



|   |            |          |   |      |      |   |      |      |      |          |          |
|---|------------|----------|---|------|------|---|------|------|------|----------|----------|
| 6 | rs410763   | 33007111 | T | 0.02 | 0.02 | C | 0.91 | 0.64 | 1.31 | 6.11E-01 | 6.06E-01 |
| 6 | rs7774158  | 33007752 | A | 0.36 | 0.36 | C | 1.03 | 0.93 | 1.13 | 6.15E-01 | 6.50E-01 |
| 6 | rs28893563 | 33011187 | A | 0.03 | 0.03 | G | 1.14 | 0.88 | 1.48 | 3.29E-01 | 4.34E-01 |
| 6 | rs652038   | 33012770 | T | 0.41 | 0.40 | C | 1.06 | 0.96 | 1.16 | 2.35E-01 | 2.61E-01 |
| 6 | rs398762   | 33014313 | G | 0.41 | 0.40 | A | 1.05 | 0.96 | 1.16 | 2.83E-01 | 3.12E-01 |
| 6 | rs3097659  | 33016033 | C | 0.15 | 0.16 | A | 0.95 | 0.84 | 1.08 | 4.31E-01 | 4.77E-01 |
| 6 | rs2567274  | 33016707 | T | 0.34 | 0.32 | C | 1.05 | 0.95 | 1.16 | 3.03E-01 | 3.50E-01 |
| 6 | rs375912   | 33016728 | C | 0.34 | 0.32 | T | 1.06 | 0.96 | 1.16 | 2.84E-01 | 3.30E-01 |
| 6 | rs2105929  | 33016887 | C | 0.29 | 0.28 | T | 1.02 | 0.92 | 1.13 | 6.93E-01 | 7.64E-01 |
| 6 | rs3128953  | 33020842 | A | 0.22 | 0.22 | G | 0.99 | 0.88 | 1.10 | 8.23E-01 | 8.18E-01 |
| 6 | rs367645   | 33024499 | A | 0.03 | 0.04 | G | 0.89 | 0.69 | 1.15 | 3.78E-01 | 3.96E-01 |
| 6 | rs376877   | 33024606 | G | 0.18 | 0.18 | C | 0.95 | 0.84 | 1.08 | 4.32E-01 | 3.79E-01 |
| 6 | rs2116263  | 33025493 | A | 0.02 | 0.03 | G | 0.80 | 0.58 | 1.09 | 1.58E-01 | 1.67E-01 |
| 6 | rs2395309  | 33026246 | G | 0.16 | 0.17 | A | 0.89 | 0.78 | 1.01 | 6.98E-02 | 7.85E-02 |
| 6 | rs9277334  | 33030112 | C | 0.13 | 0.14 | A | 0.92 | 0.81 | 1.06 | 2.58E-01 | 2.46E-01 |
| 6 | rs17214519 | 33032188 | A | 0.16 | 0.17 | G | 0.90 | 0.79 | 1.02 | 8.52E-02 | 9.38E-02 |
| 6 | rs3077     | 33033022 | C | 0.16 | 0.17 | T | 0.89 | 0.79 | 1.01 | 7.77E-02 | 8.64E-02 |
| 6 | rs2301226  | 33034596 | T | 0.13 | 0.14 | C | 0.93 | 0.81 | 1.06 | 2.70E-01 | 2.60E-01 |
| 6 | rs1367728  | 33034815 | A | 0.12 | 0.12 | G | 1.08 | 0.94 | 1.24 | 3.04E-01 | 3.19E-01 |
| 6 | rs9469341  | 33035877 | G | 0.16 | 0.17 | A | 0.90 | 0.79 | 1.02 | 9.23E-02 | 1.05E-01 |
| 6 | rs2301220  | 33038766 | A | 0.16 | 0.17 | G | 0.89 | 0.79 | 1.01 | 7.93E-02 | 8.78E-02 |
| 6 | rs9277341  | 33039625 | C | 0.29 | 0.31 | T | 0.89 | 0.81 | 0.99 | 3.16E-02 | 3.21E-02 |
| 6 | rs1431399  | 33041034 | G | 0.16 | 0.17 | A | 0.89 | 0.79 | 1.01 | 7.68E-02 | 8.57E-02 |
| 6 | rs987870   | 33042880 | C | 0.12 | 0.13 | T | 0.91 | 0.79 | 1.05 | 1.94E-01 | 2.06E-01 |
| 6 | rs2071349  | 33043520 | G | 0.13 | 0.14 | C | 0.95 | 0.83 | 1.08 | 4.26E-01 | 3.95E-01 |
| 6 | rs2071354  | 33044388 | C | 0.12 | 0.13 | T | 0.91 | 0.79 | 1.05 | 1.79E-01 | 1.89E-01 |
| 6 | rs3135021  | 33045558 | A | 0.28 | 0.29 | G | 0.97 | 0.88 | 1.07 | 5.29E-01 | 4.71E-01 |
| 6 | rs1431403  | 33047031 | C | 0.29 | 0.27 | T | 1.07 | 0.97 | 1.19 | 1.85E-01 | 1.79E-01 |
| 6 | rs9277357  | 33049979 | G | 0.30 | 0.28 | A | 1.10 | 0.99 | 1.22 | 6.49E-02 | 6.41E-02 |
| 6 | rs9277396  | 33051139 | A | 0.30 | 0.29 | G | 1.08 | 0.98 | 1.19 | 1.40E-01 | 1.39E-01 |
| 6 | rs9277464  | 33053352 | T | 0.27 | 0.24 | C | 1.14 | 1.03 | 1.27 | 1.17E-02 | 1.23E-02 |
| 6 | rs9277535  | 33054861 | G | 0.27 | 0.24 | A | 1.15 | 1.03 | 1.27 | 1.03E-02 | 1.07E-02 |
| 6 | rs9277554  | 33055538 | T | 0.30 | 0.29 | C | 1.08 | 0.97 | 1.19 | 1.57E-01 | 1.57E-01 |
| 6 | rs9277555  | 33055605 | A | 0.27 | 0.25 | G | 1.13 | 1.01 | 1.25 | 2.67E-02 | 2.66E-02 |

|   |            |          |   |      |      |   |      |      |      |          |          |
|---|------------|----------|---|------|------|---|------|------|------|----------|----------|
| 6 | rs9277565  | 33056897 | T | 0.23 | 0.20 | C | 1.21 | 1.08 | 1.35 | 7.44E-04 | 8.05E-04 |
| 6 | rs10484569 | 33058952 | A | 0.04 | 0.04 | G | 1.00 | 0.78 | 1.28 | 9.75E-01 | 9.66E-01 |
| 6 | rs2281390  | 33059669 | A | 0.19 | 0.18 | C | 1.08 | 0.96 | 1.21 | 2.04E-01 | 2.21E-01 |
| 6 | rs2281389  | 33059796 | C | 0.20 | 0.17 | T | 1.24 | 1.11 | 1.40 | 3.03E-04 | 3.34E-04 |
| 6 | rs3128917  | 33059996 | G | 0.27 | 0.25 | T | 1.13 | 1.02 | 1.25 | 2.35E-02 | 2.32E-02 |
| 6 | rs2281388  | 33060118 | T | 0.02 | 0.02 | C | 1.01 | 0.74 | 1.39 | 9.41E-01 | 8.77E-01 |
| 6 | rs3117222  | 33060949 | A | 0.27 | 0.25 | G | 1.13 | 1.02 | 1.25 | 2.45E-02 | 2.41E-02 |
| 6 | rs3128918  | 33061098 | C | 0.19 | 0.18 | T | 1.08 | 0.96 | 1.21 | 2.10E-01 | 2.27E-01 |
| 6 | rs3130192  | 33061930 | T | 0.09 | 0.09 | C | 0.97 | 0.83 | 1.14 | 7.11E-01 | 6.86E-01 |
| 6 | rs6914616  | 33063592 | A | 0.04 | 0.05 | C | 0.80 | 0.63 | 1.00 | 5.29E-02 | 5.89E-02 |
| 6 | rs3130201  | 33064916 | A | 0.43 | 0.39 | G | 1.18 | 1.07 | 1.29 | 5.14E-04 | 6.21E-04 |
| 6 | rs2179915  | 33065734 | T | 0.04 | 0.05 | G | 0.79 | 0.63 | 0.99 | 4.41E-02 | 5.00E-02 |
| 6 | rs2395319  | 33067211 | T | 0.27 | 0.25 | C | 1.13 | 1.02 | 1.25 | 2.52E-02 | 2.48E-02 |
| 6 | rs3128924  | 33071424 | G | 0.37 | 0.38 | A | 0.98 | 0.89 | 1.08 | 6.90E-01 | 6.23E-01 |
| 6 | rs2064479  | 33072240 | A | 0.26 | 0.24 | G | 1.11 | 1.00 | 1.24 | 4.54E-02 | 4.27E-02 |
| 6 | rs2064478  | 33072266 | A | 0.24 | 0.21 | G | 1.14 | 1.02 | 1.27 | 1.81E-02 | 1.82E-02 |
| 6 | rs9469357  | 33074617 | T | 0.03 | 0.04 | C | 0.89 | 0.69 | 1.15 | 3.59E-01 | 3.62E-01 |
| 6 | rs3130215  | 33074963 | A | 0.39 | 0.41 | G | 0.94 | 0.85 | 1.03 | 1.74E-01 | 2.05E-01 |
| 6 | rs3117230  | 33075635 | C | 0.24 | 0.21 | T | 1.14 | 1.02 | 1.28 | 1.68E-02 | 1.71E-02 |
| 6 | rs9296081  | 33076661 | G | 0.03 | 0.03 | C | 0.89 | 0.67 | 1.17 | 4.00E-01 | 4.09E-01 |
| 6 | rs6457713  | 33077776 | T | 0.08 | 0.09 | C | 0.87 | 0.73 | 1.03 | 1.13E-01 | 1.18E-01 |
| 6 | rs9380343  | 33079166 | T | 0.04 | 0.04 | C | 0.99 | 0.77 | 1.26 | 9.20E-01 | 8.98E-01 |
| 6 | rs11751659 | 33081632 | G | 0.14 | 0.14 | A | 1.06 | 0.93 | 1.21 | 4.01E-01 | 4.33E-01 |
| 6 | rs1810472  | 33083121 | G | 0.29 | 0.31 | A | 0.95 | 0.86 | 1.05 | 2.92E-01 | 2.61E-01 |
| 6 | rs2395349  | 33083134 | A | 0.20 | 0.21 | G | 0.93 | 0.83 | 1.04 | 1.82E-01 | 1.62E-01 |
| 6 | rs9277656  | 33084148 | T | 0.20 | 0.22 | G | 0.92 | 0.82 | 1.03 | 1.65E-01 | 1.49E-01 |
| 6 | rs3117039  | 33085851 | A | 0.44 | 0.42 | G | 1.10 | 1.00 | 1.21 | 4.51E-02 | 5.52E-02 |
| 6 | rs3117035  | 33086249 | A | 0.45 | 0.42 | G | 1.12 | 1.02 | 1.23 | 1.46E-02 | 2.00E-02 |
| 6 | rs1883414  | 33086448 | T | 0.34 | 0.30 | C | 1.21 | 1.09 | 1.33 | 1.90E-04 | 2.43E-04 |
| 6 | rs9277682  | 33087684 | C | 0.20 | 0.21 | T | 0.93 | 0.83 | 1.04 | 1.93E-01 | 1.70E-01 |
| 6 | rs9277685  | 33088084 | A | 0.17 | 0.17 | G | 0.97 | 0.86 | 1.09 | 6.11E-01 | 6.08E-01 |
| 6 | rs4713607  | 33090836 | G | 0.48 | 0.51 | A | 0.89 | 0.81 | 0.98 | 1.33E-02 | 1.82E-02 |
| 6 | rs3129274  | 33094869 | G | 0.28 | 0.31 | A | 0.85 | 0.77 | 0.94 | 1.77E-03 | 2.33E-03 |
| 6 | rs3117016  | 33095516 | T | 0.42 | 0.40 | C | 1.09 | 1.00 | 1.20 | 6.35E-02 | 8.14E-02 |

|   |            |          |   |      |      |   |      |      |      |          |          |
|---|------------|----------|---|------|------|---|------|------|------|----------|----------|
| 6 | rs3117008  | 33096274 | C | 0.48 | 0.51 | T | 0.89 | 0.81 | 0.98 | 1.44E-02 | 1.95E-02 |
| 6 | rs3117004  | 33096766 | C | 0.35 | 0.33 | T | 1.09 | 0.99 | 1.20 | 7.72E-02 | 9.44E-02 |
| 6 | rs3130237  | 33097561 | C | 0.18 | 0.16 | T | 1.18 | 1.05 | 1.33 | 7.54E-03 | 1.06E-02 |
| 6 | rs3129269  | 33097614 | T | 0.35 | 0.32 | G | 1.16 | 1.05 | 1.28 | 3.21E-03 | 4.82E-03 |
| 6 | rs6901221  | 33098276 | C | 0.18 | 0.16 | A | 1.19 | 1.05 | 1.34 | 6.32E-03 | 9.14E-03 |
| 6 | rs2294478  | 33098966 | T | 0.49 | 0.49 | G | 1.00 | 0.92 | 1.10 | 9.43E-01 | 9.55E-01 |
| 6 | rs2294472  | 33099210 | C | 0.40 | 0.41 | T | 0.97 | 0.88 | 1.07 | 5.13E-01 | 5.04E-01 |
| 6 | rs9366816  | 33104175 | C | 0.22 | 0.23 | T | 0.99 | 0.88 | 1.10 | 7.91E-01 | 7.79E-01 |
| 6 | rs13437000 | 33105064 | C | 0.19 | 0.18 | T | 1.04 | 0.92 | 1.17 | 5.09E-01 | 4.81E-01 |
| 6 | rs4713610  | 33107955 | G | 0.15 | 0.17 | T | 0.88 | 0.78 | 1.00 | 5.48E-02 | 6.00E-02 |
| 6 | rs7754200  | 33110933 | G | 0.26 | 0.22 | A | 1.23 | 1.11 | 1.37 | 1.46E-04 | 1.96E-04 |
| 6 | rs3129234  | 33111347 | A | 0.26 | 0.22 | G | 1.23 | 1.11 | 1.37 | 1.62E-04 | 2.17E-04 |
| 6 | rs3129223  | 33113197 | A | 0.26 | 0.22 | G | 1.24 | 1.11 | 1.38 | 1.04E-04 | 1.39E-04 |
| 6 | rs1003979  | 33114171 | A | 0.39 | 0.43 | G | 0.85 | 0.77 | 0.93 | 6.96E-04 | 7.17E-04 |
| 6 | rs2395365  | 33116222 | C | 0.44 | 0.40 | A | 1.19 | 1.08 | 1.30 | 3.52E-04 | 3.70E-04 |
| 6 | rs3129214  | 33117258 | A | 0.26 | 0.22 | G | 1.23 | 1.11 | 1.37 | 1.32E-04 | 1.77E-04 |
| 6 | rs721394   | 33117818 | A | 0.18 | 0.18 | G | 1.04 | 0.92 | 1.17 | 5.05E-01 | 4.70E-01 |
| 6 | rs756441   | 33122171 | C | 0.44 | 0.40 | T | 1.20 | 1.09 | 1.31 | 1.63E-04 | 1.73E-04 |
| 6 | rs756440   | 33122331 | C | 0.26 | 0.22 | T | 1.24 | 1.11 | 1.38 | 1.17E-04 | 1.56E-04 |
| 6 | rs9277912  | 33124658 | T | 0.17 | 0.17 | G | 0.97 | 0.86 | 1.10 | 6.40E-01 | 6.50E-01 |
| 6 | rs9277920  | 33125725 | A | 0.35 | 0.34 | G | 1.02 | 0.93 | 1.12 | 6.90E-01 | 7.11E-01 |
| 6 | rs4713614  | 33127987 | C | 0.44 | 0.44 | A | 0.98 | 0.89 | 1.07 | 6.39E-01 | 6.57E-01 |
| 6 | rs2235498  | 33130430 | T | 0.24 | 0.24 | C | 0.99 | 0.89 | 1.10 | 8.31E-01 | 8.01E-01 |
| 6 | rs986521   | 33136145 | C | 0.22 | 0.25 | T | 0.87 | 0.79 | 0.97 | 1.52E-02 | 1.70E-02 |
| 6 | rs2229784  | 33136310 | A | 0.03 | 0.03 | C | 1.01 | 0.78 | 1.32 | 9.32E-01 | 9.42E-01 |
| 6 | rs9368758  | 33138021 | A | 0.07 | 0.07 | G | 0.86 | 0.72 | 1.03 | 1.02E-01 | 1.13E-01 |
| 6 | rs1799910  | 33139328 | A | 0.48 | 0.45 | G | 1.14 | 1.04 | 1.24 | 6.27E-03 | 6.86E-03 |
| 6 | rs9277932  | 33141253 | T | 0.45 | 0.45 | G | 1.04 | 0.94 | 1.14 | 4.57E-01 | 4.78E-01 |
| 6 | rs2855430  | 33141280 | T | 0.16 | 0.13 | C | 1.32 | 1.16 | 1.50 | 3.29E-05 | 4.89E-05 |
| 6 | rs3762013  | 33142539 | G | 0.45 | 0.45 | A | 1.04 | 0.95 | 1.14 | 4.25E-01 | 4.49E-01 |
| 6 | rs2855425  | 33144373 | C | 0.26 | 0.29 | T | 0.87 | 0.78 | 0.96 | 7.47E-03 | 8.13E-03 |
| 6 | rs2855459  | 33154656 | T | 0.16 | 0.12 | C | 1.33 | 1.17 | 1.51 | 1.95E-05 | 2.99E-05 |
| 6 | rs2269346  | 33158898 | A | 0.07 | 0.07 | G | 0.87 | 0.73 | 1.04 | 1.32E-01 | 1.46E-01 |
| 6 | rs6531     | 33163451 | C | 0.26 | 0.29 | T | 0.87 | 0.78 | 0.96 | 7.75E-03 | 8.45E-03 |

|   |            |          |   |      |      |   |      |      |      |          |          |
|---|------------|----------|---|------|------|---|------|------|------|----------|----------|
| 6 | rs439205   | 33173842 | T | 0.26 | 0.23 | C | 1.15 | 1.04 | 1.28 | 8.14E-03 | 9.56E-03 |
| 6 | rs421446   | 33174783 | C | 0.29 | 0.27 | T | 1.11 | 1.00 | 1.23 | 4.20E-02 | 5.29E-02 |
| 6 | rs2854028  | 33179689 | A | 0.24 | 0.24 | G | 1.04 | 0.93 | 1.16 | 4.97E-01 | 5.01E-01 |
| 6 | rs1704996  | 33182895 | G | 0.05 | 0.05 | T | 1.18 | 0.96 | 1.46 | 1.15E-01 | 9.73E-02 |
| 6 | rs213213   | 33183730 | A | 0.28 | 0.31 | G | 0.86 | 0.78 | 0.95 | 3.29E-03 | 3.57E-03 |
| 6 | rs9277937  | 33184894 | C | 0.10 | 0.10 | T | 0.99 | 0.85 | 1.15 | 8.78E-01 | 8.84E-01 |
| 6 | rs1977090  | 33185578 | A | 0.13 | 0.12 | G | 1.06 | 0.92 | 1.21 | 4.26E-01 | 4.20E-01 |
| 6 | rs213212   | 33185918 | G | 0.25 | 0.28 | T | 0.87 | 0.79 | 0.97 | 1.12E-02 | 1.27E-02 |
| 6 | rs213194   | 33195604 | A | 0.25 | 0.27 | G | 0.86 | 0.78 | 0.96 | 6.36E-03 | 7.31E-03 |
| 6 | rs213220   | 33202640 | C | 0.47 | 0.45 | T | 1.06 | 0.96 | 1.16 | 2.48E-01 | 2.91E-01 |
| 6 | rs213199   | 33235755 | T | 0.34 | 0.36 | C | 0.91 | 0.83 | 1.00 | 5.46E-02 | 6.78E-02 |
| 6 | rs464921   | 33240506 | C | 0.16 | 0.16 | T | 0.98 | 0.86 | 1.11 | 7.12E-01 | 7.28E-01 |
| 6 | rs213207   | 33241169 | G | 0.47 | 0.45 | A | 1.06 | 0.96 | 1.16 | 2.41E-01 | 2.84E-01 |
| 6 | rs455567   | 33252115 | C | 0.43 | 0.46 | T | 0.90 | 0.83 | 0.99 | 3.18E-02 | 4.36E-02 |
| 6 | rs14398    | 33254665 | G | 0.15 | 0.15 | A | 0.99 | 0.87 | 1.13 | 8.98E-01 | 9.47E-01 |
| 6 | rs9277965  | 33256397 | A | 0.17 | 0.18 | G | 0.99 | 0.88 | 1.12 | 8.82E-01 | 8.95E-01 |
| 6 | rs3130257  | 33256471 | T | 0.09 | 0.10 | C | 0.91 | 0.78 | 1.06 | 2.28E-01 | 2.50E-01 |
| 6 | rs456261   | 33258443 | C | 0.46 | 0.47 | T | 0.94 | 0.85 | 1.02 | 1.50E-01 | 1.91E-01 |
| 6 | rs12664430 | 33272677 | T | 0.07 | 0.07 | C | 0.97 | 0.81 | 1.16 | 7.34E-01 | 6.55E-01 |
| 6 | rs2282851  | 33280309 | T | 0.30 | 0.30 | C | 1.02 | 0.92 | 1.13 | 6.88E-01 | 7.74E-01 |
| 6 | rs3130100  | 33283766 | T | 0.44 | 0.46 | C | 0.93 | 0.85 | 1.02 | 1.41E-01 | 1.67E-01 |
| 6 | rs2239839  | 33288075 | T | 0.30 | 0.30 | G | 1.02 | 0.92 | 1.13 | 7.31E-01 | 8.14E-01 |
| 6 | rs3130267  | 33306794 | T | 0.44 | 0.46 | G | 0.91 | 0.83 | 0.99 | 3.77E-02 | 5.04E-02 |
| 6 | rs3130014  | 33312308 | C | 0.31 | 0.32 | T | 0.92 | 0.84 | 1.02 | 1.13E-01 | 1.24E-01 |
| 6 | rs211474   | 33320613 | T | 0.30 | 0.31 | C | 0.95 | 0.86 | 1.05 | 2.88E-01 | 2.96E-01 |
| 6 | rs3106192  | 33326250 | C | 0.43 | 0.43 | T | 1.02 | 0.93 | 1.12 | 6.14E-01 | 7.43E-01 |
| 6 | rs9278019  | 33326434 | T | 0.16 | 0.15 | C | 1.13 | 0.99 | 1.28 | 6.40E-02 | 5.04E-02 |
| 6 | rs211455   | 33328518 | T | 0.29 | 0.30 | C | 0.95 | 0.86 | 1.05 | 2.88E-01 | 3.03E-01 |
| 6 | rs211452   | 33330981 | C | 0.36 | 0.36 | T | 1.00 | 0.91 | 1.11 | 9.35E-01 | 9.38E-01 |
| 6 | rs3130276  | 33336930 | T | 0.35 | 0.36 | C | 0.96 | 0.88 | 1.06 | 4.49E-01 | 3.74E-01 |
| 6 | rs461964   | 33360574 | C | 0.36 | 0.37 | A | 0.95 | 0.86 | 1.05 | 2.85E-01 | 2.24E-01 |
| 6 | rs211457   | 33365640 | T | 0.09 | 0.10 | C | 0.89 | 0.76 | 1.04 | 1.44E-01 | 1.61E-01 |
| 6 | rs442745   | 33382241 | G | 0.35 | 0.36 | A | 0.94 | 0.85 | 1.04 | 2.17E-01 | 1.71E-01 |
| 6 | rs3116713  | 33382288 | G | 0.07 | 0.08 | A | 0.85 | 0.72 | 1.01 | 7.17E-02 | 8.88E-02 |

|   |           |          |   |      |      |   |      |      |      |          |          |
|---|-----------|----------|---|------|------|---|------|------|------|----------|----------|
| 6 | rs211456  | 33389381 | A | 0.38 | 0.38 | C | 0.98 | 0.90 | 1.08 | 7.50E-01 | 7.84E-01 |
| 6 | rs2247385 | 33421577 | G | 0.39 | 0.39 | A | 1.00 | 0.91 | 1.10 | 9.35E-01 | 9.52E-01 |
| 6 | rs2772372 | 33427350 | T | 0.09 | 0.09 | C | 0.98 | 0.84 | 1.15 | 8.25E-01 | 8.76E-01 |

Results were obtained from the genotype data of 1392 generalized vitiligo cases genotyped genome-wide and 2629 public controls obtained from dbGaP. F\_A, minor allele frequency in cases; F\_U, minor allele frequency in controls. Odds ratios (OR) were calculated by conditional logistic regression. L95, lower limit of OR's 95% confidence interval; U95, upper limit of OR's 95% confidence interval. Trend p values were calculated using the Cochran-Armitage trend test implemented in PLINK;<sup>10</sup> EIGENSTRAT p values were calculated using the adjusted Cochran-Armitage trend test implemented in EIGENSTRAT.<sup>11</sup> SNP positions all refer to Genome Build GRCh37 .

**Supplementary Table 4. Second Locus Effect Tests of MHC Region SNPs Associated with Generalized Vitiligo Genome-Wide in a Forward Stepwise-Regression Procedure**

| Null Model | Alternative Model | p Value <sup>a</sup> | Null Model | Alternative Model | p Value <sup>a</sup> | Null Model | Alternative Model | p Value <sup>a</sup> | Null Model | Alternative Model | p Value <sup>a</sup> |
|------------|-------------------|----------------------|------------|-------------------|----------------------|------------|-------------------|----------------------|------------|-------------------|----------------------|
| ...        | A                 | 5.82E-9              | ...        | ...               | ...                  | E          | E+A               | 4.37E-7              | A          | A+E               | 4.65E-4              |
| A          | A+B               | NS                   | B          | B+A               | 6.75E-4              | E          | E+B               | 5.83E-5              | B          | B+E               | 2.34E-4              |
| A          | A+C               | NS                   | C          | C+A               | 4.79E-3              | E          | E+C               | 8.76E-6              | C          | C+E               | 5.04E-4              |
| A          | A+D               | NS                   | D          | D+A               | 6.75E-4              | E          | E+D               | 5.83E-5              | D          | D+E               | 2.34E-4              |
| A          | A+E               | 4.65E-4              | E          | E+A               | 4.37E-7              | ...        | E                 | 5.32E-6              | ...        | ...               | ...                  |

A, rs7758128; B, rs28362680; C, rs28362683; D, rs10947262; E, rs532098. NS, not significant (P>0.05).

<sup>a</sup> p values from linear regression analyses.
